# Supplementary material for: Contrasting response of biomass and grain yield to severe drought in Cappelle Desprez and Plainsman V wheat cultivars
Source: PeerJ. 2016 Feb 18;4:e1708. doi: 10.7717/peerj.1708 (PMC4815492; doi:10.7717/peerj.1708)
Supplement: Data S1 — Thermal images of Cappelle Desprez and Plainsman V. wheat plants were quantified by using ImageJ software by thresholding evaporative cooled area relative to the temperature of the surrounding air. The presented data were obtained from the average of thermal images taken under conditions of water stress (10% W) and well watered control (60% W) on the 20th, 27th and 34th day of drought stress. The means ±SE were calculated from 5 plants/treatment. Representative thermal images of well watered and drought stressed plants are also shown. [file peerj-04-1708-s006.xlsx]

## Sheet: thermal imaging
Thermal imaging data
Treatment conditions	10%W Cappelle	±SE	60%W Cappelle	±SE	10%W Plainsman	±SE	60%W Plainsman	±SE
20th day of drought	554.667	149.743	5740	929.469	2209	491.703	4808.67	1146.9
27th day of drought	481.333	196.045	3543.2	403.158	2025.33	599.828	4526.4	718.421
34th day of drought	446	105.836	3174	374.897	1836	294.867	3751.6	446.308
The presented data were obtained from the average of thermal images (mean, n=5 sets of images with 5 plants/treatment) taken by using a Thermo Varioscan
(Jenoptik, Laser optik, Systeme, GmbH) camera. Thermal images of wheat plants were quantified using ImageJ software by thresholding evaporative cooled
area relative to the temperature of the ambient air. Images were threshold using Hue, Saturation and Brightness (HSB) color space and converted to binary
values by defining a color scale cutoff point. Values of evaporative cooled area, represented by pixels below the ambient temperature, become black and
those in above become white.
