# Supplementary material for: Contrasting response of biomass and grain yield to severe drought in Cappelle Desprez and Plainsman V wheat cultivars
Source: PeerJ. 2016 Feb 18;4:e1708. doi: 10.7717/peerj.1708 (PMC4815492; doi:10.7717/peerj.1708)
Supplement: Supplemental Information 1 — For biomass determination digital images of seedlings were taken by using a Nikon D80 camera equipped with an AF-S DX Zoom-NIKKOR 18–135 mm objective (f/3.5-5.6G ED-IF Lens) and close-up rings. Digital images of plant replicates under various drought stress treatments were analyzed for green biomass area using ImageJ software. We used colour thresholding to select just the plant green area and exclude the stand, pot, shadows and yellowish leaves ( http://rsbweb.nih.gov/ij/). Data presented are mean (n = 5) ± se of five plants/treatment. Grain yield was determined by collecting seeds and measuring their weight at the and of the growing period. [file peerj-04-1708-s001.xlsx]

## Sheet: Figure 1 (Biomass)
Effect of drought stress on the accumulation of green biomass (pixels)
	10%W Cappelle (Green pixel area)	±SE	60%W Cappelle (Green pixel area)	±SE
14th day of drought	136982	20920	247989	32027
20th day of drought	116140	13431.8	209088	48639.1
28th day of drought	103532	15262.7	213088	39553.8
	10%W Plainsman(Green pixel area)	±SE	60%W Plainsman(Green pixel area)	±SE
14th day of drought	92366.5	9133.5	150068	17577
20th day of drought	66801.6	10257.7	116658	6801.91
28th day of drought	60542.4	8020.39	116242	13319.7
Digital images of seedlings were taken by using a Nikon D80 camera equipped with an AF-S DX Zoom-NIKKOR 18-135 mm objective (f/3.5-5.6G ED-IF
Lens) and close-up rings. Digital images of plant replicates under various drought stress treatments were analyzed for green biomass area using ImageJ
software.We used colour thresholding to select just the plant green area and exclude the stand, pot, shadows and yellowish leaves (http://rsbweb.nih.gov/ij/).
Data presented are mean (n=5) ±se of five plants/treatment.

## Sheet: Table 1 (Grainyield)
Effect of soil drought on the total yield (g) and the thousand-kernel weight (g)
Well-watered	1st grain yield/plant (g)	2nd grain yield/plant (g)	3rd grain yield/plant (g)	Total grain yield/plant**, average (g)	1000 kernel weight average* (g)
60%W Plainsman V.	1.03	0.89	1.12	1.01±0.07	32.14
60%W Cappelle	1.33	1.71	1.68	1.57±0.12	41.2
Drought stressed	1st grain yield/plant (g)	2nd grain yield/plant (g)	3rd grain yield/plant (g)	Total grain yield/plant**, average (g)	1000 kernel weight average* (g)
10%W Plainsman V.	0.68	0.76	0.88	0.77±0.06	29.1
10%W Cappelle	0.42	0, 43	0.39	0.41±0.01	19.18
	* data is average of four replications
	** extra yield comes from the yield production of side tiller(s)
