# Supplementary material for: Contrasting response of biomass and grain yield to severe drought in Cappelle Desprez and Plainsman V wheat cultivars
Source: PeerJ. 2016 Feb 18;4:e1708. doi: 10.7717/peerj.1708 (PMC4815492; doi:10.7717/peerj.1708)
Supplement: Supplemental Information 2 — Variable chlorophyll fluorescence transient from PSII and the amount of oxidized PSI primary Chl electron donor (P700+) was simultaneously measured using a DUAL PAM-100 system (WALZ, Effeltrich, Germany). F(t) and P(t) are the mean values of variable Chl fluorescence and P700+ at the indicated time points, calculated from 5 different measurements. The maximum level of P700+ is called Pm in analogy with Fm. It was determined by application of a saturation pulse (300 ms, 10,000 µmol photons m−2 s−1; 635 nm). [file peerj-04-1708-s002.xlsx]

## Sheet: 14th day of drought
Variable OJIP chlorophyll fluorescence from PSII and the amount of oxidized PSI primary Chl electron donor (P700+)
was simultaneously measured using a DUAL PAM-100 system (WALZ, Effeltrich, Germany).
The maximum level of P700+ is called Pm in analogy with Fm. It was determined by application of a saturation pulse (300 ms, 10000 μmol m-2s-1; 635nm)
after pre-illumination with far-red light.				Data presented below are mean (n=5) plants/treatment
		(A) 14th day of drought-Secondary Leaves
		10%WCappelle_OJIP Fluorescence data					60%WCappelle_OJIP Fluorescence data					10%W Plainsman OJIP Fluorescence data					60%W Plainsman OJIP Fluorescence data					10%WCappelle_P700					60%WCappelle_P700					10%W Plainsman P700					60%W Plainsman P700
	Time (s)	Mean	Mean/Fo	Mean-Fo	(Mean-Fo)/Fv		Mean	Mean/Fo	Mean-Fo	(Mean-Fo)/Fv		Mean	Mean/Fo	Mean-Fo	(Mean-Fo)/Fv		Mean	Mean/Fo	Mean-Fo	(Mean-Fo)/Fv		Mean	Mean/Po	Mean-Po	(Mean-Po)/Pv		Mean	Mean/Po	Mean-Po	(Mean-Po)/Pv		Mean	Mean/Po	Mean-Po	(Mean-Po)/Pv		Mean	Mean/Po	Mean-Po	(Mean-Po)/Pv
	0.1	0.80474	1	0	0		0.82458	1	1.11022e-16	3.17528e-17		0.6919	1	0	0		0.767375	1	0	0		0.19844	1	0	0		0.19486	1	0	0		0.1235	1	0	0		0.195575	1	0	0
	0.3	0.98706	1.22656	0.18232	0.0485987		1.01914	1.23595	0.19456	0.0556449		0.847975	1.22557	0.156075	0.0560065		0.9353	1.21883	0.167925	0.0594036		0.34174	1.72213	0.1433	0.0653896		0.34058	1.74782	0.14572	0.0703452		0.25255	2.04494	0.12905	0.0675478		0.351025	1.79484	0.15545	0.0777814
	0.6	1.38232	1.71772	0.57758	0.153958		1.41618	1.71746	0.5916	0.1692		1.16075	1.67763	0.46885	0.168244		1.28083	1.6691	0.51345	0.181633		0.65284	3.28986	0.4544	0.207348		0.6517	3.34445	0.45684	0.220536		0.5352	4.3336	0.4117	0.215493		0.665025	3.40036	0.46945	0.234895
	0.9	1.72504	2.1436	0.9203	0.245313		1.74978	2.12203	0.9252	0.26461		1.42835	2.06439	0.73645	0.26427		1.56977	2.04564	0.8024	0.28385		0.98118	4.94447	0.78274	0.357174		0.96966	4.97619	0.7748	0.374028		0.824975	6.67996	0.701475	0.367168		0.977	4.99553	0.781425	0.390996
	1.2	1.97836	2.45838	1.17362	0.312837		1.99236	2.41621	1.16778	0.333989		1.62617	2.3503	0.934275	0.335259		1.77555	2.3138	1.00818	0.356643		1.27408	6.42048	1.07564	0.490828		1.24364	6.38222	1.04878	0.50629		1.07997	8.74474	0.956475	0.500641		1.23828	6.33146	1.0427	0.521728
	1.5	2.15338	2.67587	1.34864	0.35949		2.15596	2.61462	1.33138	0.380779		1.76273	2.54766	1.07082	0.384259		1.91635	2.49728	1.14898	0.406451		1.51858	7.65259	1.32014	0.602397		1.46992	7.54347	1.27506	0.615525		1.2859	10.4121	1.1624	0.608427		1.44647	7.39601	1.2509	0.625904
	1.8	2.26862	2.81907	1.46388	0.390208		2.26408	2.74574	1.4395	0.411702		1.85367	2.67911	1.16178	0.416895		2.0075	2.61606	1.24012	0.438695		1.7138	8.63636	1.51536	0.691478		1.64658	8.45007	1.45172	0.700806		1.45055	11.7453	1.32705	0.694609		1.61255	8.24517	1.41698	0.709002
	2.1	2.34986	2.92002	1.54512	0.411863		2.33634	2.83337	1.51176	0.432369		1.91555	2.76854	1.22365	0.439099		2.06735	2.69405	1.29998	0.459867		1.86666	9.40667	1.66822	0.76123		1.78428	9.15673	1.58942	0.76728		1.57977	12.7917	1.45627	0.762248		1.74032	8.8985	1.54475	0.772935
	2.4	2.40912	2.99366	1.60438	0.427659		2.39042	2.89895	1.56584	0.447836		1.9605	2.8335	1.2686	0.455229		2.10767	2.7466	1.3403	0.474132		1.98616	10.0089	1.78772	0.815759		1.89176	9.7083	1.6969	0.819165		1.67705	13.5794	1.55355	0.813164		1.83923	9.40419	1.64365	0.822421
	2.7	2.46074	3.05781	1.656	0.441419		2.4363	2.9546	1.61172	0.460958		1.99673	2.88586	1.30482	0.468228		2.14023	2.78902	1.37285	0.485647		2.07798	10.4716	1.87954	0.857658		1.97394	10.13	1.77908	0.858837		1.75295	14.1939	1.62945	0.852892		1.91413	9.78717	1.71855	0.859898
	3	2.51264	3.1223	1.7079	0.455253		2.48106	3.00888	1.65648	0.473759		2.03155	2.93619	1.33965	0.480725		2.1675	2.82456	1.40013	0.495295		2.14798	10.8243	1.94954	0.8896		2.03698	10.4536	1.84212	0.889269		1.81113	14.665	1.68762	0.883342		1.96745	10.0598	1.77188	0.88658
	3.3	2.56522	3.18764	1.76048	0.469269		2.5283	3.06617	1.70372	0.48727		2.06615	2.9862	1.37425	0.493141		2.20167	2.8691	1.4343	0.507385		2.19862	11.0795	2.00018	0.912707		2.08238	10.6865	1.88752	0.911185		1.8561	15.0291	1.7326	0.906883		2.01425	10.2991	1.81868	0.909997
	3.6	2.62158	3.25767	1.81684	0.484292		2.57744	3.12576	1.75286	0.501324		2.10295	3.03938	1.41105	0.506346		2.23628	2.91419	1.4689	0.519624		2.23786	11.2773	2.03942	0.930613		2.1185	10.8719	1.92364	0.928622		1.8901	15.3045	1.7666	0.924679		2.04905	10.4771	1.85347	0.92741
	3.9	2.68102	3.33154	1.87628	0.500136		2.63054	3.19016	1.80596	0.516511		2.14122	3.0947	1.44932	0.520081		2.27168	2.96032	1.5043	0.532147		2.2683	11.4307	2.06986	0.944503		2.1462	11.0141	1.95134	0.941994		1.91475	15.504	1.79125	0.937582		2.0751	10.6103	1.87952	0.940444
	4.2	2.7417	3.40694	1.93696	0.516311		2.68294	3.2537	1.85836	0.531498		2.1803	3.15118	1.4884	0.534103		2.30812	3.00782	1.54075	0.545041		2.29012	11.5406	2.09168	0.95446		2.168	11.1259	1.97314	0.952517		1.93388	15.6589	1.81038	0.947592		2.09625	10.7184	1.90067	0.951027
	4.5	2.8026	3.48262	1.99786	0.532544		2.73702	3.31929	1.91244	0.546965		2.21857	3.2065	1.52668	0.547837		2.34535	3.05633	1.57797	0.55821		2.30752	11.6283	2.10908	0.9624		2.18574	11.217	1.99088	0.961081		1.94627	15.7593	1.82278	0.954083		2.11172	10.7975	1.91615	0.95877
	4.8	2.86104	3.55524	2.0563	0.548122		2.7889	3.38221	1.96432	0.561803		2.2562	3.26088	1.5643	0.561339		2.38092	3.10269	1.61355	0.570794		2.32168	11.6997	2.12324	0.968861		2.19664	11.2729	2.00178	0.966343		1.9587	15.8599	1.8352	0.960586		2.12412	10.8609	1.92855	0.964975
	5.1	2.9164	3.62403	2.11166	0.562878		2.83908	3.44306	2.0145	0.576154		2.29263	3.31352	1.60072	0.57441		2.41515	3.14729	1.64777	0.582901		2.32932	11.7382	2.13088	0.972347		2.20678	11.325	2.01192	0.971238		1.96582	15.9176	1.84232	0.964316		2.1335	10.9089	1.93792	0.969666
	5.4	2.97028	3.69098	2.16554	0.57724		2.8863	3.50033	2.06172	0.589659		2.32825	3.36501	1.63635	0.587194		2.44915	3.19159	1.68178	0.594929		2.33748	11.7793	2.13904	0.976071		2.2136	11.36	2.01874	0.974531		1.9715	15.9636	1.848	0.967286		2.14102	10.9473	1.94545	0.973431
	5.7	3.01832	3.75068	2.21358	0.590046		2.93056	3.554	2.10598	0.602318		2.35938	3.40999	1.66748	0.598363		2.47967	3.23137	1.7123	0.605727		2.3435	11.8096	2.14506	0.978818		2.22418	11.4142	2.02932	0.979638		1.978	16.0162	1.8545	0.970688		2.14573	10.9714	1.95015	0.975782
	6	3.06602	3.80995	2.26128	0.60276		2.9721	3.60438	2.14752	0.614198		2.3891	3.45296	1.6972	0.609029		2.50795	3.26822	1.74057	0.61573		2.34936	11.8391	2.15092	0.981492		2.22826	11.4352	2.0334	0.981608		1.98515	16.0741	1.86165	0.974431		2.1518	11.0024	1.95623	0.978822
	6.3	3.11032	3.865	2.30558	0.614569		3.01098	3.65153	2.1864	0.625318		2.41535	3.49089	1.72345	0.618449		2.53523	3.30376	1.76785	0.625378		2.35442	11.8646	2.15598	0.983801		2.23248	11.4568	2.03762	0.983645		1.9886	16.102	1.8651	0.976237		2.15793	11.0337	1.96235	0.981887
	6.6	3.14906	3.91314	2.34432	0.624895		3.04794	3.69635	2.22336	0.635889		2.44037	3.52706	1.74848	0.627429		2.5582	3.3337	1.79082	0.633505		2.35698	11.8775	2.15854	0.984969		2.23718	11.481	2.04232	0.985914		1.9937	16.1433	1.8702	0.978906		2.16098	11.0493	1.9654	0.983413
	6.9	3.186	3.95904	2.38126	0.634742		3.081	3.73645	2.25642	0.645344		2.46398	3.56117	1.77208	0.635898		2.5822	3.36498	1.81482	0.641996		2.35914	11.8884	2.1607	0.985955		2.2403	11.497	2.04544	0.98742		1.99838	16.1812	1.87488	0.981353		2.16383	11.0639	1.96825	0.984839
	7.2	3.22134	4.00296	2.4166	0.644162		3.1139	3.77635	2.28932	0.654754		2.48595	3.59293	1.79405	0.643783		2.6036	3.39287	1.83622	0.649566		2.36518	11.9189	2.16674	0.988711		2.24682	11.5304	2.05196	0.990567		2.00265	16.2158	1.87915	0.983591		2.16787	11.0846	1.9723	0.986865
	7.5	3.25356	4.043	2.44882	0.652751		3.14366	3.81244	2.31908	0.663265		2.50732	3.62383	1.81543	0.651453		2.62312	3.41831	1.85575	0.656473		2.3702	11.9442	2.17176	0.991002		2.24874	11.5403	2.05388	0.991494		2.00652	16.2472	1.88302	0.985619		2.17073	11.0992	1.97515	0.988292
	7.8	3.28512	4.08221	2.48038	0.661163		3.17344	3.84855	2.34886	0.671782		2.52747	3.65295	1.83557	0.658684		2.64188	3.44274	1.8745	0.663106		2.37362	11.9614	2.17518	0.992562		2.25202	11.5571	2.05716	0.993077		2.00897	16.267	1.88548	0.986901		2.1742	11.117	1.97863	0.99003
	8.1	3.31542	4.11986	2.51068	0.66924		3.2026	3.88392	2.37802	0.680122		2.5464	3.6803	1.8545	0.665475		2.65935	3.46552	1.89197	0.669287		2.3728	11.9573	2.17436	0.992188		2.25396	11.5671	2.0591	0.994014		2.00977	16.2735	1.88627	0.98732		2.17785	11.1356	1.98228	0.991857
	8.4	3.34456	4.15608	2.53982	0.677007		3.22948	3.91652	2.4049	0.68781		2.5651	3.70733	1.8732	0.672186		2.67623	3.48751	1.90885	0.675257		2.37364	11.9615	2.1752	0.992571		2.25578	11.5764	2.06092	0.994893		2.01465	16.313	1.89115	0.989872		2.17948	11.1439	1.9839	0.99267
	8.7	3.37354	4.19209	2.5688	0.684732		3.25666	3.94948	2.43208	0.695584		2.58263	3.73266	1.89072	0.678474		2.69457	3.51142	1.9272	0.681748		2.37688	11.9778	2.17844	0.99405		2.2572	11.5837	2.06234	0.995578		2.01872	16.346	1.89522	0.992005		2.18335	11.1637	1.98778	0.994609
	9	3.40302	4.22872	2.59828	0.69259		3.2832	3.98166	2.45862	0.703174		2.5993	3.75676	1.9074	0.684458		2.71145	3.53341	1.94407	0.687718		2.37866	11.9868	2.18022	0.994862		2.26064	11.6014	2.06578	0.997239		2.01952	16.3524	1.89603	0.992423		2.18538	11.1741	1.9898	0.995622
	9.3	3.42986	4.26207	2.62512	0.699745		3.30842	4.01225	2.48384	0.710387		2.61822	3.78411	1.92633	0.691249		2.7273	3.55406	1.95992	0.693325		2.38046	11.9959	2.18202	0.995683		2.2631	11.614	2.06824	0.998426		2.0226	16.3773	1.8991	0.994033		2.1866	11.1804	1.99103	0.996235
	9.6	3.45674	4.29547	2.652	0.70691		3.33352	4.04269	2.50894	0.717566		2.63453	3.80767	1.94263	0.697098		2.744	3.57583	1.97663	0.699232		2.38276	12.0075	2.18432	0.996733		2.2657	11.6273	2.07084	0.999681		2.0218	16.3709	1.8983	0.993614		2.18863	11.1907	1.99305	0.997248
	9.9	3.48246	4.32743	2.67772	0.713766		3.35938	4.07405	2.5348	0.724962		2.65163	3.83238	1.95972	0.703235		2.75985	3.59648	1.99247	0.704839		2.38536	12.0206	2.18692	0.997919		2.26636	11.6307	2.0715	1		2.0228	16.3789	1.8993	0.994138		2.18945	11.1949	1.99388	0.997661
	10.2	3.50882	4.36019	2.70408	0.720792		3.38184	4.10129	2.55726	0.731385		2.66748	3.85529	1.97558	0.708922		2.77597	3.61749	2.0086	0.710544		2.38796	12.0337	2.18952	0.999106		2.26388	11.618	2.06902	0.998803		2.02525	16.3988	1.90175	0.99542		2.1931	11.2136	1.99752	0.999487
	10.5	3.5344	4.39198	2.72966	0.727611		3.40546	4.12993	2.58088	0.738141		2.68458	3.88	1.99267	0.715059		2.792	3.63838	2.02462	0.716212		2.38992	12.0435	2.19148	1		2.26506	11.624	2.0702	0.999372		2.02727	16.4152	1.90377	0.99648		2.1907	11.2013	1.99513	0.998286
	10.8	3.5593	4.42292	2.75456	0.734248		3.4289	4.15836	2.60432	0.744845		2.70125	3.9041	2.00935	0.721042		2.8065	3.65727	2.03912	0.721342		2.38974	12.0426	2.1913	0.999918		2.26522	11.6249	2.07036	0.99945		2.02992	16.4366	1.90643	0.997867		2.18985	11.197	1.99428	0.997861
	11.1	3.5824	4.45162	2.77766	0.740405		3.4504	4.18443	2.62582	0.750994		2.71775	3.92795	2.02585	0.726963		2.82255	3.67819	2.05518	0.727019		2.38876	12.0377	2.19032	0.999471		2.26408	11.619	2.06922	0.998899		2.03275	16.4595	1.90925	0.999346		2.19068	11.2012	1.9951	0.998274
	11.4	3.60634	4.48137	2.8016	0.746787		3.47238	4.21109	2.6478	0.75728		2.73442	3.95205	2.04252	0.732947		2.838	3.69832	2.07063	0.732485		2.38876	12.0377	2.19032	0.999471		2.26568	11.6272	2.07082	0.999672		2.034	16.4696	1.9105	1		2.19232	11.2096	1.99675	0.999099
	11.7	3.62816	4.50849	2.82342	0.752603		3.49304	4.23614	2.66846	0.763189		2.74748	3.97091	2.05558	0.73763		2.85205	3.71663	2.08467	0.737455		2.38778	12.0328	2.18934	0.999023		2.26422	11.6197	2.06936	0.998967		2.03277	16.4597	1.90928	0.999359		2.1929	11.2126	1.99733	0.999387
	12	3.65044	4.53617	2.8457	0.758542		3.51274	4.26004	2.68816	0.768823		2.76455	3.99559	2.07265	0.743757		2.8665	3.73546	2.09912	0.742567		2.3868	12.0278	2.18836	0.998576		2.26228	11.6098	2.06742	0.99803		2.034	16.4696	1.9105	1		2.19413	11.2188	1.99855	1
	12.3	3.67164	4.56252	2.8669	0.764193		3.53164	4.28296	2.70706	0.774229		2.7792	4.01677	2.0873	0.749014		2.88097	3.75432	2.1136	0.747687		2.3865	12.0263	2.18806	0.998439		2.2605	11.6006	2.06564	0.997171		2.03275	16.4595	1.90925	0.999346		2.1915	11.2054	1.99592	0.998687
	12.6	3.69118	4.5868	2.88644	0.769401		3.55004	4.30527	2.72546	0.779491		2.79405	4.03823	2.10215	0.754343		2.8938	3.77104	2.12642	0.752224		2.38502	12.0188	2.18658	0.997764		2.26132	11.6048	2.06646	0.997567		2.0295	16.4332	1.906	0.997645		2.19048	11.2002	1.9949	0.998174
	12.9	3.71006	4.61026	2.90532	0.774434		3.56694	4.32577	2.74236	0.784325		2.8075	4.05767	2.1156	0.759169		2.90537	3.78612	2.138	0.756319		2.38322	12.0098	2.18478	0.996943		2.2626	11.6114	2.06774	0.998185		2.02973	16.435	1.90623	0.997762		2.18927	11.194	1.9937	0.997573
	13.2	3.7296	4.63454	2.92486	0.779642		3.58372	4.34612	2.75914	0.789124		2.82175	4.07826	2.12985	0.764283		2.92042	3.80573	2.15305	0.761643		2.38224	12.0048	2.1838	0.996496		2.26228	11.6098	2.06742	0.99803		2.0305	16.4413	1.907	0.998168		2.19128	11.2043	1.9957	0.998574
	13.5	3.74604	4.65497	2.9413	0.784025		3.59886	4.36448	2.77428	0.793454		2.83438	4.09651	2.14248	0.768813		2.93145	3.8201	2.16407	0.765543		2.3798	11.9925	2.18136	0.995382		2.26112	11.6038	2.06626	0.99747		2.0291	16.43	1.9056	0.997435		2.19068	11.2012	1.9951	0.998274
	13.8	3.7631	4.67617	2.95836	0.788572		3.61352	4.38226	2.78894	0.797647		2.84638	4.11385	2.15448	0.773119		2.94345	3.83574	2.17607	0.769788		2.37964	11.9917	2.1812	0.995309		2.25854	11.5906	2.06368	0.996225		2.02707	16.4136	1.90358	0.996375		2.19008	11.1981	1.9945	0.997974
	14.1	3.7781	4.69481	2.97336	0.792571		3.62786	4.39965	2.80328	0.801748		2.85795	4.13058	2.16605	0.777273		2.95403	3.84952	2.18665	0.773529		2.37704	11.9786	2.1786	0.994123		2.25576	11.5763	2.0609	0.994883		2.02767	16.4184	1.90417	0.996689		2.18723	11.1836	1.99165	0.996547
	14.4	3.79358	4.71404	2.98884	0.796697		3.6412	4.41582	2.81662	0.805563		2.86915	4.14677	2.17725	0.781292		2.9652	3.86408	2.19782	0.777482		2.37672	11.977	2.17828	0.993977		2.25348	11.5646	2.05862	0.993782		2.0291	16.43	1.9056	0.997435		2.18455	11.1699	1.98897	0.995209
	14.7	3.8074	4.73122	3.00266	0.800381		3.65358	4.43084	2.829	0.809104		2.87973	4.16205	2.18783	0.785087		2.97478	3.87656	2.2074	0.780869		2.37428	11.9647	2.17584	0.992863		2.25152	11.5546	2.05666	0.992836		2.0289	16.4283	1.9054	0.997331		2.18375	11.1658	1.98818	0.994809
	15	3.82256	4.75006	3.01782	0.804422		3.6653	4.44505	2.84072	0.812456		2.8893	4.17589	2.1974	0.788523		2.98473	3.88953	2.21735	0.784389		2.37072	11.9468	2.17228	0.991239		2.2476	11.5344	2.05274	0.990944		2.0281	16.4219	1.9046	0.996912		2.18193	11.1565	1.98635	0.993896
	15.3	3.8346	4.76502	3.02986	0.807631		3.67636	4.45846	2.85178	0.815619		2.89988	4.19118	2.20797	0.792318		2.9951	3.90305	2.22772	0.788059		2.36744	11.9303	2.169	0.989742		2.24436	11.5178	2.0495	0.98938		2.02767	16.4184	1.90417	0.996689		2.1809	11.1512	1.98533	0.993383
	15.6	3.8481	4.78179	3.04336	0.81123		3.6876	4.47209	2.86302	0.818834		2.90883	4.20411	2.21692	0.795529		3.00325	3.91367	2.23588	0.790942		2.36582	11.9221	2.16738	0.989003		2.24112	11.5012	2.04626	0.987816		2.02727	16.4152	1.90377	0.99648		2.17785	11.1356	1.98228	0.991857
	15.9	3.85834	4.79452	3.0536	0.813959		3.69734	4.48391	2.87276	0.82162		2.91798	4.21734	2.22607	0.798813		3.0114	3.92429	2.24403	0.793825		2.36386	11.9122	2.16542	0.988108		2.23752	11.4827	2.04266	0.986078		2.02725	16.415	1.90375	0.996467		2.17645	11.1285	1.98087	0.991156
	16.2	3.8691	4.80789	3.06436	0.816827		3.70778	4.49657	2.8832	0.824605		2.92652	4.22969	2.23462	0.801881		3.01932	3.93461	2.25195	0.796629		2.36106	11.8981	2.16262	0.986831		2.23426	11.466	2.0394	0.984504		2.02663	16.4099	1.90312	0.99614		2.17663	11.1294	1.98105	0.991244
	16.5	3.87986	4.82126	3.07512	0.819695		3.71624	4.50683	2.89166	0.827025		2.93447	4.24118	2.24257	0.804734		3.02648	3.94393	2.2591	0.799158		2.35702	11.8777	2.15858	0.984987		2.22988	11.4435	2.03502	0.98239		2.02542	16.4002	1.90193	0.995512		2.17623	11.1273	1.98065	0.991044
	16.8	3.88832	4.83177	3.08358	0.82195		3.72538	4.51791	2.9008	0.829639		2.942	4.25206	2.2501	0.807434		3.0336	3.95322	2.26622	0.801679		2.35212	11.8531	2.15368	0.982751		2.22826	11.4352	2.0334	0.981608		2.02502	16.397	1.90152	0.995302		2.17358	11.1138	1.978	0.989718
	17.1	3.89694	4.84248	3.0922	0.824248		3.73334	4.52757	2.90876	0.831916		2.94952	4.26294	2.25762	0.810134		3.04153	3.96354	2.27415	0.804482		2.34774	11.831	2.1493	0.980753		2.22466	11.4167	2.0298	0.97987		2.0234	16.3838	1.8999	0.994452		2.17338	11.1127	1.9778	0.989617
	17.4	3.90476	4.8522	3.10002	0.826333		3.74114	4.53702	2.91656	0.834147		2.95622	4.27262	2.26432	0.812538		3.0472	3.97094	2.27983	0.80649		2.34578	11.8211	2.14734	0.979858		2.22028	11.3942	2.02542	0.977755		2.0193	16.3506	1.8958	0.992306		2.17235	11.1075	1.97677	0.989105
	17.7	3.9137	4.86331	3.10896	0.828716		3.74684	4.54394	2.92226	0.835777		2.96335	4.28292	2.27145	0.815095		3.05393	3.9797	2.28655	0.808869		2.34416	11.8129	2.14572	0.979119		2.21506	11.3674	2.0202	0.975235		2.0177	16.3377	1.8942	0.991468		2.17112	11.1012	1.97555	0.988492
	18	3.9233	4.87524	3.11856	0.831275		3.75448	4.5532	2.9299	0.837962		2.9701	4.29267	2.2782	0.817517		3.05985	3.98742	2.29248	0.810965		2.34072	11.7956	2.14228	0.977549		2.21326	11.3582	2.0184	0.974366		2.0175	16.336	1.894	0.991364		2.16768	11.0836	1.9721	0.986765
	18.3	3.92788	4.88093	3.12314	0.832495		3.76084	4.56092	2.93626	0.839781		2.97518	4.30001	2.28328	0.819338		3.0651	3.99427	2.29772	0.812822		2.33244	11.7539	2.134	0.973771		2.21018	11.3424	2.01532	0.97288		2.01547	16.3196	1.89197	0.990304		2.16602	11.0752	1.97045	0.98594
	18.6	3.93358	4.88801	3.12884	0.834015		3.76558	4.56666	2.941	0.841136		2.98065	4.30792	2.28875	0.821303		3.07043	4.00121	2.30305	0.814705		2.32544	11.7186	2.127	0.970577		2.20544	11.3181	2.01058	0.970591		2.01383	16.3063	1.89033	0.98944		2.16625	11.0763	1.97067	0.986052
	18.9	3.94238	4.89895	3.13764	0.836361		3.77192	4.57435	2.94734	0.84295		2.98758	4.31793	2.29568	0.823788		3.07508	4.00727	2.3077	0.81635		2.32464	11.7146	2.1262	0.970212		2.20076	11.2941	2.0059	0.968332		2.01365	16.3049	1.89015	0.989348		2.16443	11.067	1.96885	0.985139
	19.2	3.94792	4.90583	3.14318	0.837837		3.77648	4.57988	2.9519	0.844254		2.99105	4.32295	2.29915	0.825035		3.07958	4.01313	2.3122	0.817942		2.3217	11.6998	2.12326	0.96887		2.19536	11.2663	2.0005	0.965725		2.0118	16.2899	1.8883	0.98838		2.16197	11.0545	1.9664	0.983913
	19.5	3.9528	4.9119	3.14806	0.839138		3.78216	4.58677	2.95758	0.845878		2.99797	4.33296	2.30607	0.82752		3.08445	4.01948	2.31707	0.819667		2.31504	11.6662	2.1166	0.965831		2.19	11.2388	1.99514	0.963138		2.01118	16.2848	1.88767	0.988053		2.15995	11.0441	1.96437	0.9829
	19.8	3.95964	4.9204	3.1549	0.840961		3.78788	4.59371	2.9633	0.847514		3.00183	4.33852	2.30992	0.828902		3.08873	4.02505	2.32135	0.821179		2.31178	11.6498	2.11334	0.964344		2.18508	11.2136	1.99022	0.960763		2.00895	16.2668	1.88545	0.986888		2.15955	11.0421	1.96398	0.9827
	20.1	3.9624	4.92383	3.15766	0.841697		3.7921	4.59883	2.96752	0.848721		3.00592	4.34445	2.31402	0.830373		3.09178	4.02903	2.3244	0.822258		2.30508	11.616	2.10664	0.961286		2.18104	11.1929	1.98618	0.958812		2.00365	16.2239	1.88015	0.984114		2.1561	11.0244	1.96053	0.980974
	20.4	3.96874	4.9317	3.164	0.843387		3.79666	4.60436	2.97208	0.850025		3.01078	4.35146	2.31887	0.832113		3.09642	4.03509	2.32905	0.823903		2.30102	11.5955	2.10258	0.959434		2.17646	11.1694	1.9816	0.956601		1.9996	16.1911	1.8761	0.981994		2.15388	11.013	1.9583	0.97986
	20.7	3.97396	4.93819	3.16922	0.844778		3.80008	4.6085	2.9755	0.851004		3.01587	4.35883	2.32397	0.833943		3.0995	4.03909	2.33213	0.824991		2.29694	11.575	2.0985	0.957572		2.17142	11.1435	1.97656	0.954168		1.99838	16.1812	1.87488	0.981353		2.151	10.9983	1.95542	0.978422
	21	3.97786	4.94304	3.17312	0.845818		3.80366	4.61285	2.97908	0.852027		3.01912	4.36353	2.32722	0.83511		3.1036	4.04444	2.33623	0.826441		2.29026	11.5413	2.09182	0.954524		2.16526	11.1119	1.9704	0.951195		1.99695	16.1696	1.87345	0.980607		2.14895	10.9879	1.95338	0.977396
	21.3	3.98274	4.9491	3.178	0.847119		3.80774	4.61779	2.98316	0.853194		3.0232	4.36942	2.3313	0.836572		3.10767	4.04975	2.3403	0.827883		2.28606	11.5202	2.08762	0.952607		2.16134	11.0918	1.96648	0.949302		1.99775	16.1761	1.87425	0.981026		2.14838	10.9849	1.9528	0.977108
	21.6	3.98744	4.95494	3.1827	0.848372		3.81182	4.62274	2.98724	0.854361		3.0285	4.37708	2.3366	0.838474		3.10968	4.05235	2.3423	0.82859		2.27902	11.4847	2.08058	0.949395		2.15922	11.0809	1.96436	0.948279		1.99612	16.163	1.87262	0.980175		2.1463	10.9743	1.95073	0.97607
	21.9	3.98942	4.9574	3.18468	0.848899		3.81508	4.62669	2.9905	0.855294		3.0285	4.37708	2.3366	0.838474		3.11212	4.05555	2.34475	0.829457		2.27136	11.4461	2.07292	0.9459		2.15676	11.0683	1.9619	0.947091		1.99065	16.1186	1.86715	0.97731		2.14633	10.9744	1.95075	0.976083
	22.2	3.9948	4.96409	3.19006	0.850333		3.8191	4.63157	2.99452	0.856443		3.03255	4.38293	2.34065	0.839927		3.1162	4.06086	2.34883	0.830898		2.26518	11.4149	2.06674	0.94308		2.15304	11.0492	1.95818	0.945296		1.98863	16.1022	1.86512	0.97625		2.14345	10.9597	1.94788	0.974644
	22.5	3.99788	4.96792	3.19314	0.851154		3.8219	4.63497	2.99732	0.857244		3.0352	4.38676	2.3433	0.840878		3.11863	4.06402	2.35125	0.831756		2.25916	11.3846	2.06072	0.940333		2.14864	11.0266	1.95378	0.943172		1.98677	16.0872	1.86328	0.975281		2.1406	10.9452	1.94503	0.973218
	22.8	4.00112	4.97194	3.19638	0.852018		3.8253	4.63909	3.00072	0.858217		3.03825	4.39117	2.34635	0.841972		3.12173	4.06806	2.35435	0.832853		2.25234	11.3502	2.0539	0.937221		2.14356	11.0005	1.9487	0.940719		1.98515	16.0741	1.86165	0.974431		2.13877	10.9358	1.9432	0.972305
	23.1	4.00552	4.97741	3.20078	0.853191		3.82792	4.64227	3.00334	0.858966		3.0415	4.39587	2.3496	0.843139		3.12475	4.072	2.35738	0.833923		2.24598	11.3182	2.04754	0.934318		2.13726	10.9682	1.9424	0.937678		1.98188	16.0476	1.85838	0.972717		2.13837	10.9338	1.9428	0.972105
	23.4	4.00928	4.98208	3.20454	0.854193		3.83134	4.64641	3.00676	0.859944		3.0429	4.39789	2.351	0.843641		3.1268	4.07467	2.35942	0.834648		2.23916	11.2838	2.04072	0.931206		2.13122	10.9372	1.93636	0.934762		1.97845	16.0198	1.85495	0.970924		2.13632	10.9233	1.94075	0.971079
	23.7	4.01106	4.98429	3.20632	0.854668		3.83392	4.64954	3.00934	0.860682		3.0464	4.40295	2.3545	0.844897		3.12982	4.07861	2.36245	0.835718		2.23378	11.2567	2.03534	0.928751		2.125	10.9053	1.93014	0.93176		1.97618	16.0014	1.85268	0.969733		2.13675	10.9255	1.94118	0.971292
	24	4.01352	4.98735	3.20878	0.855323		3.83656	4.65274	3.01198	0.861437		3.04882	4.40645	2.35692	0.845767		3.13148	4.08076	2.3641	0.836302		2.22564	11.2157	2.0272	0.925037		2.1211	10.8853	1.92624	0.929877		1.97663	16.0051	1.85312	0.969969		2.13492	10.9161	1.93935	0.970379
	24.3	4.01772	4.99257	3.21298	0.856443		3.839	4.6557	3.01442	0.862135		3.0515	4.41032	2.3596	0.846727		3.1335	4.0834	2.36612	0.837018		2.21832	11.1788	2.01988	0.921697		2.11608	10.8595	1.92122	0.927454		1.97558	15.9966	1.85207	0.969419		2.13207	10.9016	1.9365	0.968952
	24.6	4.01808	4.99302	3.21334	0.856539		3.84176	4.65905	3.01718	0.862924		3.05353	4.41325	2.36163	0.847454		3.13635	4.08712	2.36897	0.838026		2.21114	11.1426	2.0127	0.91842		2.10974	10.827	1.91488	0.924393		1.9715	15.9636	1.848	0.967286		2.13108	10.8965	1.9355	0.968452
	24.9	4.02214	4.99806	3.2174	0.857621		3.84436	4.6622	3.01978	0.863668		3.05572	4.41643	2.36382	0.848243		3.13735	4.08842	2.36998	0.83838		2.20596	11.1165	2.00752	0.916057		2.10208	10.7876	1.90722	0.920695		1.9654	15.9142	1.8419	0.964093		2.1288	10.8848	1.93322	0.967314
	25.2	4.0241	5.0005	3.21936	0.858144		3.84664	4.66497	3.02206	0.86432		3.058	4.41971	2.3661	0.84906		3.1404	4.09239	2.37303	0.839459		2.19974	11.0852	2.0013	0.913218		2.0954	10.7534	1.90054	0.91747		1.96093	15.8779	1.83743	0.961751		2.12843	10.8829	1.93285	0.967126
	25.5	4.02688	5.00395	3.22214	0.858885		3.84972	4.6687	3.02514	0.865201		3.05963	4.42206	2.36773	0.849643		3.14285	4.09559	2.37547	0.840326		2.19374	11.0549	1.9953	0.910481		2.08988	10.725	1.89502	0.914806		1.95972	15.8682	1.83622	0.961123		2.12597	10.8704	1.9304	0.9659
	25.8	4.03044	5.00838	3.2257	0.859834		3.85134	4.67067	3.02676	0.865664		3.06208	4.4256	2.37018	0.850522		3.1447	4.098	2.37732	0.84098		2.1882	11.027	1.98976	0.907953		2.08464	10.6981	1.88978	0.912276		1.95625	15.8401	1.83275	0.959304		2.12332	10.8568	1.92775	0.964574
	26.1	4.03174	5.00999	3.227	0.86018		3.85446	4.67445	3.02988	0.866556		3.06288	4.42676	2.37098	0.850809		3.1461	4.09982	2.37873	0.841475		2.17876	10.9794	1.98032	0.903645		2.07912	10.6698	1.88426	0.909611		1.95338	15.8168	1.82987	0.957799		2.1225	10.8526	1.92692	0.964162
	26.4	4.0345	5.01342	3.22976	0.860916		3.85574	4.676	3.03116	0.866923		3.06575	4.43091	2.37385	0.851841		3.14815	4.10249	2.38077	0.842201		2.17176	10.9442	1.97332	0.900451		2.07116	10.629	1.8763	0.905769		1.95217	15.8071	1.82868	0.957171		2.1203	10.8414	1.92473	0.963061
	26.7	4.0363	5.01566	3.23156	0.861396		3.85786	4.67858	3.03328	0.867529		3.06775	4.43381	2.37585	0.852558		3.14958	4.10435	2.3822	0.842705		2.16476	10.9089	1.96632	0.897257		2.06464	10.5955	1.86978	0.902621		1.94995	15.7891	1.82645	0.956006		2.11965	10.838	1.92407	0.962735
	27	4.03824	5.01807	3.2335	0.861913		3.86032	4.68156	3.03574	0.868232		3.06858	4.435	2.37668	0.852854		3.1522	4.10777	2.38483	0.843633		2.1597	10.8834	1.96126	0.894948		2.05862	10.5646	1.86376	0.899715		1.94423	15.7427	1.82072	0.95301		2.11943	10.8369	1.92385	0.962623
	27.3	4.04054	5.02093	3.2358	0.862526		3.8629	4.68469	3.03832	0.86897		3.0702	4.43735	2.3783	0.853438		3.15388	4.10995	2.3865	0.844226		2.15188	10.844	1.95344	0.891379		2.05404	10.5411	1.85918	0.897504		1.9418	15.7231	1.8183	0.95174		2.1166	10.8224	1.92102	0.961209
	27.6	4.0443	5.0256	3.23956	0.863528		3.86488	4.68709	3.0403	0.869537		3.07285	4.44118	2.38095	0.854388		3.1549	4.11129	2.38753	0.844588		2.14454	10.807	1.9461	0.88803		2.0487	10.5137	1.85384	0.894926		1.94077	15.7148	1.81727	0.951204		2.11517	10.8152	1.9196	0.960496
	27.9	4.04544	5.02701	3.2407	0.863832		3.86716	4.68985	3.04258	0.870189		3.07527	4.44468	2.38338	0.855259		3.1571	4.11416	2.38972	0.845367		2.1361	10.7645	1.93766	0.884179		2.04232	10.481	1.84746	0.891846		1.93772	15.6901	1.81422	0.949607		2.11435	10.8109	1.91877	0.960084
	28.2	4.04736	5.0294	3.24262	0.864344		3.86926	4.6924	3.04468	0.870789		3.07693	4.44707	2.38503	0.855851		3.15773	4.11497	2.39035	0.845588		2.1281	10.7241	1.92966	0.880528		2.03482	10.4425	1.83996	0.888226		1.93487	15.667	1.81137	0.948116		2.11253	10.8016	1.91695	0.95917
	28.5	4.04916	5.03164	3.24442	0.864824		3.87106	4.69458	3.04648	0.871304		3.07855	4.44941	2.38665	0.856434		3.15932	4.11705	2.39195	0.846154		2.1203	10.6848	1.92186	0.876969		2.0264	10.3993	1.83154	0.884161		1.93203	15.6439	1.80852	0.946624		2.10988	10.7881	1.9143	0.957844
	28.8	4.05322	5.03668	3.24848	0.865906		3.87284	4.69674	3.04826	0.871813		3.07998	4.45147	2.38808	0.856945		3.16138	4.11973	2.394	0.846879		2.11558	10.6611	1.91714	0.874815		2.02002	10.3665	1.82516	0.881081		1.92817	15.6128	1.80468	0.944609		2.10887	10.7829	1.9133	0.957344
	29.1	4.05388	5.0375	3.24914	0.866082		3.87612	4.70072	3.05154	0.872751		3.0806	4.45238	2.3887	0.85717		3.16222	4.12083	2.39485	0.84718		2.1081	10.6234	1.90966	0.871402		2.01368	10.334	1.81882	0.878021		1.9243	15.5814	1.8008	0.94258		2.10542	10.7653	1.90985	0.955618
	29.4	4.05422	5.03793	3.24948	0.866172		3.87772	4.70266	3.05314	0.873209		3.0818	4.45411	2.3899	0.8576		3.16502	4.12448	2.39765	0.84817		2.09754	10.5701	1.8991	0.866583		2.00538	10.2914	1.81052	0.874014		1.9196	15.5433	1.7961	0.94012		2.10418	10.7589	1.9086	0.954992
	29.7	4.05698	5.04135	3.25224	0.866908		3.88034	4.70584	3.05576	0.873958		3.08323	4.45617	2.39133	0.858111		3.16665	4.1266	2.39927	0.848745		2.0889	10.5266	1.89046	0.862641		1.99756	10.2513	1.8027	0.870239		1.91433	15.5006	1.79082	0.937359		2.09892	10.7321	1.90335	0.952365
	30	4.05896	5.04382	3.25422	0.867436		3.8797	4.70506	3.05512	0.873775		3.08525	4.4591	2.39335	0.858838		3.1681	4.12849	2.40072	0.849258		2.08154	10.4895	1.8831	0.859282		1.98716	10.1979	1.7923	0.865218		1.90942	15.4609	1.78592	0.934795		2.09642	10.7193	1.90085	0.951115
	30.3	4.05992	5.04501	3.25518	0.867692		3.8828	4.70882	3.05822	0.874662		3.08628	4.46058	2.39438	0.859206		3.1691	4.12979	2.40172	0.849612		2.07212	10.442	1.87368	0.854984		1.98128	10.1677	1.78642	0.86238		1.9068	15.4397	1.7833	0.933421		2.0934	10.7038	1.89783	0.949601
	30.6	4.06168	5.0472	3.25694	0.868161		3.88506	4.71156	3.06048	0.875308		3.0881	4.46322	2.3962	0.859861		3.16973	4.13061	2.40235	0.849833		2.06136	10.3878	1.86292	0.850074		1.97248	10.1225	1.77762	0.858132		1.90173	15.3986	1.77822	0.930764		2.08993	10.6861	1.89435	0.947862
	30.9	4.06428	5.05043	3.25954	0.868854		3.88734	4.71433	3.06276	0.87596		3.0891	4.46466	2.3972	0.86022		3.17092	4.13217	2.40355	0.850257		2.05274	10.3444	1.8543	0.846141		1.96188	10.0682	1.76702	0.853015		1.89785	15.3672	1.77435	0.928736		2.08625	10.6673	1.89068	0.946023
	31.2	4.06676	5.05351	3.26202	0.869515		3.88928	4.71668	3.0647	0.876515		3.09158	4.46824	2.39967	0.861108		3.17218	4.1338	2.4048	0.8507		2.04626	10.3117	1.84782	0.843184		1.95312	10.0232	1.75826	0.848786		1.8956	15.349	1.7721	0.927558		2.08343	10.6528	1.88785	0.94461
	31.5	4.0679	5.05492	3.26316	0.869819		3.89044	4.71809	3.06586	0.876847		3.0922	4.46914	2.4003	0.861332		3.17278	4.13458	2.4054	0.850912		2.0381	10.2706	1.83966	0.83946		1.94562	9.98471	1.75076	0.845165		1.89075	15.3097	1.76725	0.92502		2.07895	10.6299	1.88338	0.942371
	31.8	4.07064	5.05833	3.2659	0.870549		3.89272	4.72085	3.06814	0.877499		3.0942	4.47203	2.4023	0.86205		3.175	4.13748	2.40762	0.851699		2.0295	10.2273	1.83106	0.835536		1.9365	9.9379	1.74164	0.840763		1.88645	15.2749	1.76295	0.922769		2.0759	10.6143	1.88033	0.940845
	32.1	4.07046	5.05811	3.26572	0.870501		3.8945	4.72301	3.06992	0.878008		3.09545	4.47384	2.40355	0.862498		3.17747	4.14071	2.4101	0.852574		2.01726	10.1656	1.81882	0.829951		1.92802	9.89439	1.73316	0.836669		1.88585	15.27	1.76235	0.922455		2.07527	10.6111	1.8797	0.940532
	32.4	4.07344	5.06181	3.2687	0.871296		3.89692	4.72595	3.07234	0.8787		3.09727	4.47648	2.40537	0.863153		3.1783	4.14178	2.41093	0.852866		2.00618	10.1098	1.80774	0.824895		1.92072	9.85692	1.72586	0.833145		1.8828	15.2453	1.7593	0.920858		2.06917	10.58	1.8736	0.93748
	32.7	4.07536	5.06419	3.27062	0.871807		3.89776	4.72696	3.07318	0.87894		3.09828	4.47792	2.40638	0.863512		3.1797	4.14361	2.41233	0.853362		1.99772	10.0671	1.79928	0.821034		1.91274	9.81597	1.71788	0.829293		1.8773	15.2008	1.7538	0.91798		2.06493	10.5582	1.86935	0.935353
	33	4.07666	5.06581	3.27192	0.872154		3.90006	4.72975	3.07548	0.879598		3.09908	4.47908	2.40718	0.863799		3.18133	4.14572	2.41395	0.853936		1.9873	10.0146	1.78886	0.816279		1.90544	9.77851	1.71058	0.825769		1.8712	15.1514	1.7477	0.914787		2.06122	10.5393	1.86565	0.933502
	33.3	4.07844	5.06802	3.2737	0.872628		3.9025	4.73271	3.07792	0.880296		3.09972	4.48002	2.40782	0.864032		3.18215	4.1468	2.41478	0.854228		1.9777	9.96624	1.77926	0.811899		1.89826	9.74166	1.7034	0.822303		1.86488	15.1002	1.74137	0.911476		2.05883	10.527	1.86325	0.932301
	33.6	4.07894	5.06864	3.2742	0.872762		3.90376	4.73424	3.07918	0.880656		3.10073	4.48146	2.40883	0.864391		3.1846	4.14999	2.41723	0.855095		1.96646	9.90959	1.76802	0.80677		1.89076	9.70317	1.6959	0.818682		1.85977	15.0589	1.73628	0.908807		2.05555	10.5103	1.85997	0.930662
	33.9	4.08238	5.07292	3.27764	0.873679		3.90624	4.73725	3.08166	0.881366		3.10155	4.48266	2.40965	0.864687		3.18315	4.1481	2.41578	0.854582		1.95718	9.86283	1.75874	0.802535		1.88262	9.6614	1.68776	0.814753		1.85593	15.0277	1.73243	0.906791		2.04988	10.4813	1.8543	0.927823
	34.2	4.08418	5.07515	3.27944	0.874158		3.90882	4.74038	3.08424	0.882104		3.10235	4.48381	2.41045	0.864974		3.18617	4.15204	2.4188	0.855652		1.94806	9.81687	1.74962	0.798374		1.87236	9.60874	1.6775	0.8098		1.85227	14.9982	1.72877	0.904881		2.04765	10.4699	1.85207	0.926709
	34.5	4.08548	5.07677	3.28074	0.874505		3.91012	4.74195	3.08554	0.882475		3.10235	4.48381	2.41045	0.864974		3.18843	4.15498	2.42105	0.856448		1.9383	9.76769	1.73986	0.79392		1.86472	9.56954	1.66986	0.806112		1.84922	14.9735	1.72572	0.903284		2.04272	10.4447	1.84715	0.924245
	34.8	4.08872	5.0808	3.28398	0.875369		3.91178	4.74397	3.0872	0.88295		3.10625	4.48945	2.41435	0.866374		3.18987	4.15687	2.4225	0.856961		1.92902	9.72092	1.73058	0.789686		1.85444	9.51678	1.65958	0.801149		1.84635	14.9502	1.72285	0.90178		2.03705	10.4157	1.84147	0.921406
	35.1	4.0897	5.08201	3.28496	0.87563		3.91354	4.7461	3.08896	0.883454		3.10665	4.49003	2.41475	0.866517		3.19068	4.15791	2.4233	0.857244		1.91908	9.67083	1.72064	0.78515		1.84662	9.47665	1.65176	0.797374		1.84455	14.9356	1.72105	0.900837		2.03215	10.3906	1.83658	0.918954
	35.4	4.09182	5.08465	3.28708	0.876195		3.91534	4.74828	3.09076	0.883968		3.10785	4.49176	2.41595	0.866948		3.1917	4.15924	2.42433	0.857607		1.90784	9.61419	1.7094	0.780021		1.8393	9.43908	1.64444	0.79384		1.84228	14.9172	1.71877	0.899647		2.0297	10.3781	1.83413	0.917728
	35.7	4.09408	5.08746	3.28934	0.876797		3.91732	4.75069	3.09274	0.884535		3.10988	4.49469	2.41798	0.867675		3.19292	4.16084	2.42555	0.85804		1.90004	9.57488	1.7016	0.776462		1.83102	9.39659	1.63616	0.789843		1.83803	14.8828	1.71453	0.897422		2.02422	10.3501	1.82865	0.914988
	36	4.09408	5.08746	3.28934	0.876797		3.9217	4.756	3.09712	0.885787		3.11008	4.49498	2.41818	0.867746		3.19313	4.1611	2.42575	0.858111		1.88818	9.51512	1.68974	0.77105		1.82466	9.36395	1.6298	0.786773		1.83255	14.8385	1.70905	0.894556		2.02035	10.3303	1.82478	0.913049
	36.3	4.09588	5.08969	3.29114	0.877277		3.92136	4.75558	3.09678	0.88569		3.1107	4.49588	2.4188	0.867971		3.19515	4.16374	2.42778	0.858827		1.87788	9.46321	1.67944	0.76635		1.81488	9.31376	1.62002	0.782052		1.82662	14.7905	1.70312	0.891455		2.01852	10.321	1.82295	0.912136
	36.6	4.09852	5.09297	3.29378	0.877981		3.92316	4.75777	3.09858	0.886205		3.11278	4.49888	2.42088	0.868715		3.19655	4.16556	2.42917	0.859322		1.86798	9.41332	1.66954	0.761832		1.80692	9.27291	1.61206	0.778209		1.8195	14.7328	1.696	0.887726		2.01565	10.3063	1.82008	0.910698
	36.9	4.10012	5.09496	3.29538	0.878407		3.92432	4.75917	3.09974	0.886537		3.11275	4.49884	2.42085	0.868706		3.19845	4.16804	2.43107	0.859994		1.85756	9.36081	1.65912	0.757077		1.79812	9.22775	1.60326	0.773961		1.81135	14.6668	1.68785	0.88346		2.01322	10.2939	1.81765	0.909484
	37.2	4.10356	5.09924	3.29882	0.879324		3.92626	4.76153	3.10168	0.887092		3.11578	4.50322	2.42387	0.869792		3.19925	4.16908	2.43187	0.860277		1.84796	9.31244	1.64952	0.752697		1.79016	9.1869	1.5953	0.770118		1.8063	14.6259	1.6828	0.880817		2.00588	10.2563	1.8103	0.905807
	37.5	4.10436	5.10023	3.29962	0.879537		3.92804	4.76369	3.10346	0.887601		3.1158	4.50325	2.4239	0.869801		3.20005	4.17013	2.43268	0.86056		1.83638	9.25408	1.63794	0.747413		1.78154	9.14267	1.58668	0.765957		1.8018	14.5895	1.6783	0.878461		1.99838	10.2179	1.8028	0.902054
	37.8	4.10482	5.1008	3.30008	0.87966		3.92952	4.76548	3.10494	0.888024		3.11825	4.50679	2.42635	0.87068		3.20167	4.17224	2.4343	0.861135		1.82758	9.20974	1.62914	0.743397		1.77142	9.09073	1.57656	0.761072		1.79872	14.5646	1.67522	0.876852		1.99307	10.1908	1.7975	0.899402
	38.1	4.10728	5.10386	3.30254	0.880316		3.93196	4.76844	3.10738	0.888722		3.11865	4.50737	2.42675	0.870824		3.2029	4.17384	2.43553	0.861569		1.81768	9.15985	1.61924	0.73888		1.76116	9.03808	1.5663	0.756119		1.7912	14.5036	1.6677	0.872913		1.98677	10.1586	1.7912	0.89625
	38.4	4.10892	5.1059	3.30418	0.880753		3.93406	4.77099	3.10948	0.889322		3.11903	4.50791	2.42713	0.870958		3.20472	4.17622	2.43735	0.862214		1.80562	9.09907	1.60718	0.733377		1.75188	8.99045	1.55702	0.751639		1.78777	14.4759	1.66427	0.87112		1.98107	10.1295	1.7855	0.893398
	38.7	4.11022	5.10751	3.30548	0.881099		3.93666	4.77414	3.11208	0.890066		3.12107	4.51088	2.42917	0.871694		3.20615	4.17807	2.43878	0.862718		1.79438	9.04243	1.59594	0.728248		1.74212	8.94037	1.54726	0.746927		1.78165	14.4263	1.65815	0.867914		1.9762	10.1046	1.78062	0.890958
	39	4.11298	5.11094	3.30824	0.881835		3.93892	4.77688	3.11434	0.890712		3.1209	4.51062	2.429	0.871631		3.20615	4.17807	2.43878	0.862718		1.78446	8.99244	1.58602	0.723721		1.73234	8.89018	1.53748	0.742206		1.77313	14.3573	1.64962	0.863452		1.96907	10.0681	1.7735	0.887393
	39.3	4.1138	5.11196	3.30906	0.882054		3.93994	4.77812	3.11536	0.891004		3.1221	4.51236	2.4302	0.872062		3.20715	4.17938	2.43978	0.863072		1.77338	8.93661	1.57494	0.718665		1.71898	8.82162	1.52412	0.735757		1.7678	14.3142	1.6443	0.860665		1.96152	10.0295	1.76595	0.883616
	39.6	4.11528	5.1138	3.31054	0.882448		3.94188	4.78047	3.1173	0.891559		3.12352	4.51442	2.43162	0.872573		3.2098	4.18283	2.44243	0.864009		1.76102	8.87432	1.56258	0.713025		1.70698	8.76003	1.51212	0.729964		1.76107	14.2597	1.63758	0.857145		1.95423	9.9922	1.75865	0.879963
	39.9	4.119	5.11842	3.31426	0.88344		3.9435	4.78243	3.11892	0.892022		3.12473	4.51615	2.43282	0.873003		3.2094	4.18231	2.44203	0.863868		1.75206	8.82917	1.55362	0.708936		1.69686	8.7081	1.502	0.725078		1.75517	14.2119	1.63167	0.854057		1.9479	9.95986	1.75232	0.876798
	40.2	4.11996	5.11962	3.31522	0.883696		3.94466	4.78384	3.12008	0.892354		3.12493	4.51644	2.43303	0.873075		3.21223	4.18599	2.44485	0.864867		1.73984	8.76759	1.5414	0.70336		1.68808	8.66304	1.49322	0.72084		1.7499	14.1692	1.6264	0.851295		1.94322	9.93596	1.74765	0.874459
	40.5	4.12094	5.12083	3.3162	0.883957		3.94772	4.78755	3.12314	0.893229		3.1274	4.52002	2.4355	0.873963		3.21265	4.18655	2.44528	0.865018		1.72878	8.71185	1.53034	0.698313		1.67846	8.61367	1.4836	0.716196		1.7436	14.1182	1.6201	0.847998		1.93792	9.90886	1.74235	0.871807
	40.8	4.12308	5.12349	3.31834	0.884527		3.94952	4.78974	3.12494	0.893744		3.12763	4.52034	2.43573	0.874044		3.2139	4.18817	2.44652	0.86546		1.71558	8.64533	1.51714	0.69229		1.66868	8.56348	1.47382	0.711475		1.73647	14.0605	1.61298	0.844269		1.93203	9.87869	1.73645	0.868855
	41.1	4.12376	5.12434	3.31902	0.884709		3.951	4.79153	3.12642	0.894167		3.12922	4.52266	2.43732	0.874618		3.21572	4.19055	2.44835	0.866105		1.7032	8.58295	1.50476	0.686641		1.66072	8.52263	1.46586	0.707632		1.73035	14.0109	1.60685	0.841063		1.9255	9.84533	1.72992	0.86559
	41.4	4.12716	5.12856	3.32242	0.885615		3.95296	4.79391	3.12838	0.894728		3.13002	4.52381	2.43812	0.874905		3.21692	4.19212	2.44955	0.86653		1.6946	8.53961	1.49616	0.682717		1.65046	8.46998	1.4556	0.702679		1.72445	13.9632	1.60095	0.837974		1.9192	9.81312	1.72362	0.862438
	41.7	4.12926	5.13117	3.32452	0.886175		3.95522	4.79665	3.13064	0.895374		3.13042	4.52439	2.43852	0.875049		3.21733	4.19264	2.44995	0.866671		1.68252	8.47873	1.48408	0.677204		1.64182	8.42564	1.44696	0.698508		1.7196	13.9239	1.5961	0.835436		1.91207	9.77668	1.7165	0.858873
	42	4.13056	5.13279	3.32582	0.886521		3.957	4.79881	3.13242	0.895883		3.13227	4.52706	2.44037	0.875713		3.21975	4.1958	2.45237	0.867529		1.6697	8.41413	1.47126	0.671355		1.63176	8.37401	1.4369	0.693652		1.71267	13.8678	1.58918	0.831811		1.90823	9.757	1.71265	0.856946
	42.3	4.13284	5.13562	3.3281	0.887129		3.95798	4.8	3.1334	0.896164		3.13512	4.53118	2.44322	0.876735		3.22142	4.19798	2.45405	0.868122		1.65714	8.35084	1.4587	0.665623		1.62148	8.32126	1.42662	0.688689		1.70535	13.8085	1.58185	0.827977		1.89825	9.706	1.70267	0.851955
	42.6	4.13494	5.13823	3.3302	0.887689		3.9603	4.80281	3.13572	0.896827		3.1337	4.52912	2.4418	0.876224		3.2222	4.19899	2.45483	0.868396		1.6451	8.29016	1.44666	0.660129		1.61368	8.28123	1.41882	0.684924		1.69555	13.7291	1.57205	0.822847		1.89092	9.66854	1.69535	0.84829
	42.9	4.13658	5.14027	3.33184	0.888126		3.96208	4.80497	3.1375	0.897336		3.13615	4.53266	2.44425	0.877103		3.22365	4.20088	2.45628	0.868909		1.63516	8.24007	1.43672	0.655593		1.6044	8.2336	1.40954	0.680444		1.6907	13.6899	1.5672	0.820309		1.88563	9.64144	1.69005	0.845638
	43.2	4.13792	5.14193	3.33318	0.888483		3.96452	4.80793	3.13994	0.898034		3.13715	4.53411	2.44525	0.877462		3.22465	4.20218	2.45728	0.869263		1.62456	8.18666	1.42612	0.650757		1.59446	8.18259	1.3996	0.675646		1.68495	13.6433	1.56145	0.817299		1.88015	9.61345	1.68457	0.842899
	43.5	4.14114	5.14594	3.3364	0.889341		3.96628	4.81006	3.1417	0.898537		3.1378	4.53505	2.4459	0.877695		3.2267	4.20485	2.45933	0.869988		1.61562	8.1416	1.41718	0.646677		1.5847	8.13251	1.38984	0.670934		1.67502	13.563	1.55153	0.812104		1.87258	9.57472	1.677	0.839108
	43.8	4.14114	5.14594	3.3364	0.889341		3.96812	4.81229	3.14354	0.899064		3.1396	4.53765	2.4477	0.878341		3.22832	4.20697	2.46095	0.870563		1.60278	8.0769	1.40434	0.640818		1.57426	8.07893	1.3794	0.665894		1.66768	13.5034	1.54418	0.808257		1.8675	9.54877	1.67193	0.836569
	44.1	4.14458	5.15021	3.33984	0.890258		3.97022	4.81484	3.14564	0.899664		3.14062	4.53913	2.44873	0.878709		3.22812	4.20671	2.46075	0.870492		1.59106	8.01784	1.39262	0.63547		1.56336	8.02299	1.3685	0.660632		1.65892	13.4326	1.53543	0.803677		1.85815	9.50096	1.66257	0.831891
	44.4	4.14652	5.15262	3.34178	0.890776		3.9718	4.81676	3.14722	0.900116		3.1449	4.54531	2.453	0.880243		3.2314	4.21098	2.46402	0.87165		1.57836	7.95384	1.37992	0.629675		1.55248	7.96716	1.35762	0.65538		1.65243	13.38	1.52893	0.800275		1.85185	9.46875	1.65627	0.828738
	44.7	4.14832	5.15486	3.34358	0.891255		3.97478	4.82037	3.1502	0.900968		3.1437	4.54358	2.4518	0.879813		3.23117	4.21069	2.4638	0.871571		1.56744	7.89881	1.369	0.624692		1.54286	7.91779	1.348	0.650736		1.6449	13.319	1.5214	0.796336		1.8433	9.42503	1.64773	0.82446
	45	4.14928	5.15605	3.34454	0.891511		3.97592	4.82175	3.15134	0.901294		3.14348	4.54325	2.45158	0.879732		3.23382	4.21414	2.46645	0.872508		1.55524	7.83733	1.3568	0.619125		1.5331	7.8677	1.33824	0.646025		1.63837	13.2662	1.51487	0.792921		1.837	9.39282	1.64142	0.821308
	45.3	4.15174	5.15911	3.347	0.892167		3.97752	4.82369	3.15294	0.901752		3.14387	4.54383	2.45198	0.879875		3.23462	4.21518	2.46725	0.872791		1.5448	7.78472	1.34636	0.614361		1.52056	7.80335	1.3257	0.639971		1.63268	13.22	1.50917	0.789937		1.8313	9.36367	1.63573	0.818456
	45.6	4.15336	5.16112	3.34862	0.892599		3.97966	4.82629	3.15508	0.902364		3.1461	4.54704	2.4542	0.880674		3.23647	4.21759	2.4691	0.873446		1.53148	7.7176	1.33304	0.608283		1.51324	7.76578	1.31838	0.636437		1.62532	13.1605	1.50182	0.78609		1.82258	9.31906	1.627	0.81409
	45.9	4.15548	5.16375	3.35074	0.893164		3.98192	4.82903	3.15734	0.90301		3.14732	4.54881	2.45542	0.881113		3.23687	4.21811	2.4695	0.873587		1.52022	7.66085	1.32178	0.603145		1.50376	7.71713	1.3089	0.631861		1.616	13.085	1.4925	0.781209		1.8142	9.27624	1.61862	0.8099
	46.2	4.15774	5.16656	3.353	0.893766		3.98374	4.83124	3.15916	0.903531		3.14955	4.55203	2.45765	0.881912		3.2389	4.22075	2.47153	0.874304		1.50948	7.60673	1.31104	0.598244		1.49386	7.66632	1.299	0.627082		1.60848	13.0241	1.48497	0.77727		1.80563	9.23239	1.61005	0.805609
	46.5	4.15872	5.16778	3.35398	0.894028		3.986	4.83398	3.16142	0.904177		3.1504	4.55326	2.4585	0.882217		3.23992	4.22209	2.47255	0.874666		1.49728	7.54525	1.29884	0.592677		1.4851	7.62137	1.29024	0.622853		1.60155	12.968	1.47805	0.773646		1.7977	9.19187	1.60213	0.801644
	46.8	4.16036	5.16982	3.35562	0.894465		3.98796	4.83635	3.16338	0.904738		3.15225	4.55593	2.46035	0.882881		3.24153	4.22417	2.47415	0.875232		1.48442	7.48045	1.28598	0.586809		1.47642	7.57682	1.28156	0.618663		1.59482	12.9136	1.47132	0.770126		1.78957	9.15033	1.594	0.797578
	47.1	4.16196	5.17181	3.35722	0.894891		3.98876	4.83732	3.16418	0.904967		3.15203	4.55561	2.46013	0.8828		3.24403	4.22743	2.47665	0.876117		1.46958	7.40566	1.27114	0.580037		1.4657	7.52181	1.27084	0.613488		1.58547	12.8379	1.46198	0.765232		1.78248	9.11402	1.5869	0.794026
	47.4	4.1659	5.1767	3.36116	0.895941		3.99136	4.84048	3.16678	0.90571		3.15203	4.55561	2.46013	0.8828		3.2438	4.22714	2.47642	0.876037		1.45868	7.35074	1.26024	0.575063		1.4564	7.47408	1.26154	0.608998		1.57573	12.7589	1.45223	0.760128		1.77495	9.07555	1.57937	0.79026
	47.7	4.16768	5.17891	3.36294	0.896416		3.99284	4.84227	3.16826	0.906134		3.1528	4.55673	2.4609	0.883078		3.24565	4.22955	2.47828	0.876691		1.44646	7.28916	1.24802	0.569487		1.44602	7.42081	1.25116	0.603987		1.56777	12.6945	1.44427	0.755967		1.768	9.04001	1.57242	0.786783
	48	4.16996	5.18175	3.36522	0.897024		3.99414	4.84385	3.16956	0.906505		3.15548	4.56059	2.46358	0.884038		3.24665	4.23085	2.47927	0.877045		1.4375	7.244	1.23906	0.565399		1.43688	7.37391	1.24202	0.599575		1.56025	12.6336	1.43675	0.752028		1.7615	9.00677	1.56593	0.783531
	48.3	4.17256	5.18498	3.36782	0.897717		3.99642	4.84661	3.17184	0.907158		3.1563	4.56179	2.4644	0.884334		3.24825	4.23294	2.48088	0.877611		1.4271	7.19159	1.22866	0.560653		1.42744	7.32546	1.23258	0.595018		1.5525	12.5709	1.429	0.747972		1.75358	8.96625	1.558	0.779565
	48.6	4.17224	5.18458	3.3675	0.897631		3.9987	4.84938	3.17412	0.90781		3.15773	4.56385	2.46583	0.884845		3.25033	4.23564	2.48295	0.878345		1.41634	7.13737	1.2179	0.555743		1.41636	7.2686	1.2215	0.589669		1.54743	12.5298	1.42393	0.745315		1.74543	8.92458	1.54985	0.775487
	48.9	4.17516	5.18821	3.37042	0.89841		4.00018	4.85117	3.1756	0.908233		3.15873	4.56529	2.46683	0.885204		3.2503	4.23561	2.48292	0.878336		1.4074	7.09232	1.20896	0.551664		1.40772	7.22426	1.21286	0.585498		1.5397	12.4672	1.4162	0.741272		1.73608	8.87677	1.5405	0.770809
	49.2	4.17826	5.19206	3.37352	0.899236		4.00226	4.8537	3.17768	0.908828		3.15972	4.56674	2.46782	0.885563		3.25252	4.23851	2.48515	0.879123		1.39552	7.03245	1.19708	0.546243		1.3991	7.18003	1.20424	0.581337		1.5303	12.3911	1.4068	0.736352		1.7265	8.82782	1.53093	0.766018
	49.5	4.18004	5.19427	3.3753	0.899711		4.00328	4.85493	3.1787	0.90912		3.16055	4.56793	2.46865	0.885859		3.25415	4.24063	2.48678	0.879698		1.38382	6.97349	1.18538	0.540904		1.38772	7.12163	1.19286	0.575844		1.52198	12.3237	1.39847	0.731994		1.71653	8.77681	1.52095	0.761027
	49.8	4.18168	5.19631	3.37694	0.900148		4.00588	4.85809	3.1813	0.909863		3.16507	4.57447	2.47317	0.887483		3.25563	4.24255	2.48825	0.88022		1.3711	6.90939	1.17266	0.5351		1.37876	7.07564	1.1839	0.571518		1.51547	12.2711	1.39197	0.728592		1.70655	8.72581	1.51097	0.756036
	50.1	4.18316	5.19815	3.37842	0.900542		4.007	4.85944	3.18242	0.910183		3.16345	4.57212	2.47155	0.8869		3.25663	4.24385	2.48925	0.880574		1.3576	6.84136	1.15916	0.528939		1.36898	7.02545	1.17412	0.566797		1.5053	12.1887	1.3818	0.723266		1.69758	8.67992	1.502	0.751545
	50.4	4.18494	5.20036	3.3802	0.901017		4.00928	4.86221	3.1847	0.910836		3.16425	4.57328	2.47235	0.887187		3.25842	4.2462	2.49105	0.881211		1.34506	6.77817	1.14662	0.523217		1.3589	6.97372	1.16404	0.561931		1.49737	12.1245	1.37387	0.719118		1.68765	8.62917	1.49208	0.746579
	50.7	4.18772	5.20382	3.38298	0.901758		4.01106	4.86437	3.18648	0.911345		3.16628	4.5762	2.47438	0.887913		3.25945	4.24753	2.49207	0.881573		1.33236	6.71417	1.13392	0.517422		1.34878	6.92179	1.15392	0.557046		1.49045	12.0684	1.36695	0.715493		1.6803	8.59159	1.48473	0.742901
	51	4.19048	5.20725	3.38574	0.902493		4.01252	4.86614	3.18794	0.911762		3.16688	4.57707	2.47498	0.888129		3.26107	4.24965	2.4937	0.882148		1.3221	6.66247	1.12366	0.51274		1.33838	6.86842	1.14352	0.552025		1.48148	11.9957	1.35797	0.710796		1.67215	8.54992	1.47657	0.738823
	51.3	4.1921	5.20926	3.38736	0.902925		4.01498	4.86912	3.1904	0.912466		3.1691	4.58029	2.4772	0.888927		3.26275	4.25183	2.49538	0.882741		1.30976	6.60028	1.11132	0.507109		1.32942	6.82244	1.13456	0.5477		1.47172	11.9168	1.34823	0.705692		1.66197	8.49789	1.4664	0.733732
	51.6	4.19408	5.21172	3.38934	0.903453		4.01678	4.8713	3.1922	0.912981		3.16913	4.58032	2.47722	0.888936		3.26295	4.25209	2.49558	0.882811		1.30108	6.55654	1.10264	0.503149		1.31966	6.77235	1.1248	0.542988		1.46152	11.8342	1.33803	0.700353		1.6522	8.44791	1.45663	0.728841
	51.9	4.19714	5.21552	3.3924	0.904269		4.01856	4.87346	3.19398	0.91349		3.1677	4.57826	2.4758	0.888425		3.26578	4.25577	2.4984	0.883811		1.29084	6.50494	1.0924	0.498476		1.3086	6.71559	1.11374	0.537649		1.45158	11.7536	1.32807	0.695145		1.64308	8.40125	1.4475	0.724275
	52.2	4.19862	5.21736	3.39388	0.904663		4.01954	4.87465	3.19496	0.91377		3.17135	4.58354	2.47945	0.889735		3.26742	4.25792	2.50005	0.884394		1.277	6.43519	1.07856	0.492161		1.29768	6.65955	1.10282	0.532378		1.44525	11.7024	1.32175	0.691835		1.63207	8.34501	1.4365	0.718771
	52.5	4.1991	5.21796	3.39436	0.904791		4.02248	4.87822	3.1979	0.914611		3.17155	4.58383	2.47965	0.889806		3.26823	4.25897	2.50085	0.884677		1.26332	6.36626	1.06488	0.485918		1.28742	6.6069	1.09256	0.527425		1.43775	11.6417	1.31425	0.687909		1.62353	8.30129	1.42795	0.714493
	52.8	4.20222	5.22184	3.39748	0.905623		4.0241	4.88018	3.19952	0.915074		3.17198	4.58444	2.48007	0.889959		3.27005	4.26135	2.50267	0.885323		1.25372	6.31788	1.05528	0.481538		1.2801	6.56933	1.08524	0.523891		1.43	11.5789	1.3065	0.683852		1.61377	8.25144	1.4182	0.709614
	53.1	4.20464	5.22484	3.3999	0.906268		4.0262	4.88273	3.20162	0.915675		3.1752	4.5891	2.4833	0.891116		3.2723	4.26428	2.50493	0.886119		1.2425	6.26134	1.04406	0.476418		1.27082	6.52171	1.07596	0.519411		1.42348	11.5261	1.29998	0.680437		1.60702	8.21692	1.41145	0.706237
	53.4	4.20886	5.23009	3.40412	0.907393		4.02816	4.88511	3.20358	0.916235		3.17543	4.58943	2.48353	0.891197		3.2737	4.2661	2.50632	0.886614		1.22994	6.19804	1.0315	0.470686		1.2607	6.46977	1.06584	0.514526		1.4135	11.4453	1.29	0.675216		1.59807	8.17116	1.4025	0.701759
	53.7	4.20822	5.22929	3.40348	0.907222		4.02916	4.88632	3.20458	0.916521		3.17725	4.59207	2.48535	0.891852		3.2745	4.26714	2.50712	0.886897		1.2184	6.13989	1.01996	0.465421		1.24966	6.41312	1.0548	0.509196		1.4064	11.3879	1.2829	0.6715		1.58747	8.11696	1.3919	0.696455
	54	4.2113	5.23312	3.40656	0.908043		4.0314	4.88903	3.20682	0.917162		3.17888	4.59441	2.48698	0.892435		3.27617	4.26933	2.5088	0.88749		1.20928	6.09393	1.01084	0.461259		1.24022	6.36467	1.04536	0.504639		1.39908	11.3285	1.27557	0.667666		1.57955	8.07644	1.38397	0.69249
	54.3	4.21326	5.23555	3.40852	0.908566		4.0332	4.89122	3.20862	0.917677		3.17985	4.59582	2.48795	0.892785		3.27798	4.27167	2.5106	0.888126		1.1995	6.04465	1.00106	0.456796		1.2311	6.31787	1.03624	0.500237		1.3903	11.2575	1.2668	0.663072		1.57123	8.03387	1.37565	0.688324
	54.6	4.21488	5.23757	3.41014	0.908997		4.035	4.8934	3.21042	0.918192		3.18133	4.59795	2.48943	0.893314		3.2796	4.27379	2.51222	0.888701		1.18714	5.98236	0.9887	0.451156		1.2223	6.27271	1.02744	0.495988		1.38095	11.1818	1.25745	0.658178		1.56025	7.97776	1.36468	0.682833
	54.9	4.21668	5.2398	3.41194	0.909477		4.03728	4.89617	3.2127	0.918844		3.18337	4.60092	2.49147	0.89405		3.28125	4.27594	2.51388	0.889285		1.1756	5.92421	0.97716	0.44589		1.2145	6.23268	1.01964	0.492223		1.37177	11.1075	1.24828	0.653376		1.55412	7.94644	1.35855	0.679768
	55.2	4.22026	5.24425	3.41552	0.910431		4.03794	4.89697	3.21336	0.919032		3.18395	4.60175	2.49205	0.894256		3.28285	4.27803	2.51547	0.889851		1.1658	5.87482	0.96736	0.441419		1.2052	6.18495	1.01034	0.487734		1.36183	11.0269	1.23832	0.648168		1.54375	7.89339	1.34817	0.674577
	55.5	4.22078	5.2449	3.41604	0.91057		4.0402	4.89971	3.21562	0.919679		3.18438	4.60236	2.49248	0.894409		3.2845	4.28018	2.51713	0.890435		1.15654	5.82816	0.9581	0.437193		1.1969	6.14236	1.00204	0.483727		1.35165	10.9445	1.22815	0.642842		1.53398	7.84341	1.3384	0.669686
	55.8	4.22334	5.24808	3.4186	0.911252		4.04232	4.90228	3.21774	0.920285		3.18518	4.60352	2.49328	0.894696		3.28552	4.28151	2.51815	0.890797		1.14676	5.77888	0.94832	0.43273		1.18926	6.10315	0.9944	0.480039		1.34147	10.8621	1.21798	0.637516		1.52405	7.79266	1.32848	0.664719
	56.1	4.22566	5.25096	3.42092	0.911871		4.04344	4.90364	3.21886	0.920605		3.187	4.60616	2.4951	0.89535		3.2857	4.28174	2.51832	0.890859		1.1362	5.72566	0.93776	0.427912		1.18064	6.05891	0.98578	0.475877		1.33335	10.7964	1.20985	0.633264		1.51465	7.7446	1.31907	0.660016
	56.4	4.23004	5.25641	3.4253	0.913038		4.04606	4.90681	3.22148	0.921355		3.18498	4.60323	2.49308	0.894624		3.28898	4.28601	2.5216	0.892018		1.1282	5.68535	0.92976	0.424261		1.17182	6.01365	0.97696	0.47162		1.3201	10.6891	1.1966	0.626328		1.5061	7.70088	1.31052	0.655738
	56.7	4.23134	5.25802	3.4266	0.913385		4.04868	4.90999	3.2241	0.922104		3.18783	4.60735	2.49593	0.895647		3.2894	4.28656	2.52203	0.892168		1.11582	5.62296	0.91738	0.418612		1.16258	5.96623	0.96772	0.467159		1.31357	10.6362	1.19007	0.622913		1.49307	7.63428	1.2975	0.649221
	57	4.23296	5.26003	3.42822	0.913817		4.0487	4.91001	3.22412	0.92211		3.18985	4.61028	2.49795	0.896373		3.291	4.28865	2.52363	0.892734		1.1025	5.55584	0.90406	0.412534		1.15278	5.91594	0.95792	0.462428		1.3028	10.549	1.1793	0.617273		1.48208	7.57804	1.2865	0.643717
	57.3	4.23414	5.2615	3.4294	0.914131		4.05194	4.91394	3.22736	0.923036		3.19068	4.61147	2.49878	0.896669		3.29325	4.29158	2.52588	0.89353		1.09402	5.5131	0.89558	0.408664		1.14382	5.86996	0.94896	0.458103		1.2926	10.4664	1.1691	0.611934		1.47192	7.52614	1.27635	0.638638
	57.6	4.23622	5.26409	3.43148	0.914686		4.05342	4.91574	3.22884	0.92346		3.19188	4.6132	2.49998	0.8971		3.29387	4.29239	2.5265	0.893751		1.0841	5.46311	0.88566	0.404138		1.13392	5.81915	0.93906	0.453324		1.2843	10.3992	1.1608	0.60759		1.4605	7.46772	1.26493	0.632921
	57.9	4.23736	5.2655	3.43262	0.91499		4.05504	4.9177	3.23046	0.923923		3.19517	4.61797	2.50327	0.898284		3.29648	4.29578	2.5291	0.894671		1.0714	5.39911	0.87296	0.398343		1.1256	5.77645	0.93074	0.449307		1.27737	10.3431	1.15387	0.603965		1.45237	7.42618	1.2568	0.628856
	58.2	4.2408	5.26978	3.43606	0.915907		4.05602	4.91889	3.23144	0.924203		3.19517	4.61797	2.50327	0.898284		3.29752	4.29715	2.53015	0.895042		1.06472	5.36545	0.86628	0.395295		1.1176	5.7354	0.92274	0.445445		1.26517	10.2443	1.14167	0.597579		1.44118	7.36891	1.2456	0.623252
	58.5	4.24274	5.27219	3.438	0.916424		4.0581	4.92141	3.23352	0.924798		3.19597	4.61913	2.50407	0.898571		3.29913	4.29923	2.53175	0.895608		1.05412	5.31203	0.85568	0.390458		1.10884	5.69044	0.91398	0.441217		1.25642	10.1735	1.13292	0.592999		1.43345	7.32941	1.23788	0.619387
	58.8	4.24516	5.27519	3.44042	0.917069		4.06088	4.92479	3.2363	0.925593		3.1984	4.62263	2.5065	0.899441		3.3008	4.30142	2.53342	0.896201		1.04128	5.24733	0.84284	0.384599		1.10104	5.65042	0.90618	0.437451		1.24768	10.1026	1.12417	0.588419		1.42532	7.28787	1.22975	0.615321
	59.1	4.24876	5.27967	3.44402	0.918028		4.06316	4.92755	3.23858	0.926245		3.1978	4.62177	2.5059	0.899226		3.302	4.30298	2.53463	0.896625		1.03086	5.19482	0.83242	0.379844		1.09304	5.60936	0.89818	0.433589		1.2371	10.017	1.1136	0.582884		1.41473	7.23367	1.21915	0.610017
	59.4	4.24974	5.28089	3.445	0.91829		4.06448	4.92915	3.2399	0.926623		3.1994	4.62408	2.5075	0.8998		3.30342	4.30484	2.53605	0.897129		1.01816	5.13082	0.81972	0.374049		1.08408	5.56338	0.88922	0.429264		1.22568	9.92449	1.10217	0.576904		1.40515	7.18471	1.20958	0.605226
	59.7	4.25234	5.28412	3.4476	0.918983		4.06578	4.93073	3.2412	0.926995		3.1994	4.62408	2.5075	0.8998		3.30527	4.30725	2.5379	0.897784		1.00758	5.0775	0.80914	0.369221		1.07626	5.52325	0.8814	0.425489		1.2143	9.83239	1.0908	0.57095		1.39298	7.12246	1.1974	0.599134
	60	4.25414	5.28635	3.4494	0.919462		4.06612	4.93114	3.24154	0.927092		3.2023	4.62827	2.5104	0.900841		3.30667	4.30907	2.5393	0.898279		0.9996	5.03729	0.80116	0.365579		1.0696	5.48907	0.87474	0.422274		1.20513	9.7581	1.08163	0.566148		1.38318	7.07235	1.1876	0.594231
	60.3	4.25462	5.28695	3.44988	0.91959		4.0674	4.93269	3.24282	0.927458		3.20308	4.62939	2.51118	0.901119		3.30808	4.3109	2.5407	0.898774		0.99016	4.98972	0.79172	0.361272		1.06096	5.44473	0.8661	0.418103		1.19718	9.69372	1.07367	0.561986		1.37465	7.02876	1.17908	0.589965
	60.6	4.2577	5.29078	3.45296	0.920411		4.0708	4.93682	3.24622	0.92843		3.2043	4.63116	2.5124	0.901558		3.31053	4.31409	2.54315	0.899641		0.98282	4.95273	0.78438	0.357922		1.053	5.40388	0.85814	0.41426		1.19007	9.63623	1.06658	0.55827		1.36365	6.97252	1.16807	0.584461
	60.9	4.26096	5.29483	3.45622	0.92128		4.07146	4.93762	3.24688	0.928619		3.20575	4.63326	2.51385	0.902079		3.31093	4.31461	2.54355	0.899782		0.97368	4.90667	0.77524	0.353752		1.0434	5.35461	0.84854	0.409626		1.18215	9.57206	1.05865	0.554122		1.35308	6.91845	1.1575	0.57917
	61.2	4.26242	5.29664	3.45768	0.92167		4.07328	4.93982	3.2487	0.92914		3.20735	4.63557	2.51545	0.902653		3.3132	4.31758	2.54582	0.900587		0.96232	4.84943	0.76388	0.348568		1.03494	5.3112	0.84008	0.405542		1.17275	9.49595	1.04925	0.549202		1.3437	6.87051	1.14813	0.574479
	61.5	4.26536	5.3003	3.46062	0.922453		4.0762	4.94337	3.25162	0.929975		3.2086	4.63738	2.5167	0.903101		3.31482	4.31969	2.54745	0.901162		0.95318	4.80337	0.75474	0.344397		1.02858	5.27856	0.83372	0.402472		1.16322	9.41883	1.03973	0.544216		1.33475	6.82475	1.13918	0.570001
	61.8	4.26584	5.30089	3.4611	0.922581		4.07752	4.94497	3.25294	0.930352		3.2086	4.63738	2.5167	0.903101		3.31542	4.32048	2.54805	0.901374		0.9426	4.75005	0.74416	0.33957		1.01948	5.23186	0.82462	0.398079		1.1553	9.35466	1.0318	0.540068		1.32743	6.78729	1.13185	0.566336
	62.1	4.26864	5.30437	3.4639	0.923327		4.07864	4.94632	3.25406	0.930673		3.21185	4.64207	2.51995	0.904268		3.31827	4.32419	2.5509	0.902383		0.93398	4.70661	0.73554	0.335636		1.01066	5.1866	0.8158	0.393821		1.1502	9.31336	1.0267	0.537399		1.31888	6.74358	1.1233	0.562057
	62.4	4.27024	5.30636	3.4655	0.923754		4.07994	4.9479	3.25536	0.931045		3.21267	4.64326	2.52077	0.904564		3.3195	4.32579	2.55213	0.902816		0.9226	4.64926	0.72416	0.330443		1.00172	5.14072	0.80686	0.389505		1.14105	9.23927	1.01755	0.532609		1.30953	6.69577	1.11395	0.557379
	62.7	4.27318	5.31001	3.46844	0.924538		4.08154	4.94984	3.25696	0.931502		3.21385	4.64496	2.52195	0.904985		3.32008	4.32654	2.5527	0.903019		0.9117	4.59434	0.71326	0.32547		0.99096	5.0855	0.7961	0.384311		1.13145	9.16154	1.00795	0.527584		1.29893	6.64157	1.10335	0.552075
	63	4.27432	5.31143	3.46958	0.924842		4.08368	4.95244	3.2591	0.932114		3.2147	4.64619	2.5228	0.90529		3.32215	4.32924	2.55477	0.903753		0.90126	4.54173	0.70282	0.320706		0.98298	5.04454	0.78812	0.380459		1.12108	9.07753	0.997575	0.522154		1.28878	6.58967	1.0932	0.546997
	63.3	4.27644	5.31406	3.4717	0.925407		4.08548	4.95462	3.2609	0.932629		3.21592	4.64796	2.52402	0.90573		3.32278	4.33005	2.5554	0.903974		0.89166	4.49335	0.69322	0.316325		0.97484	5.00277	0.77998	0.376529		1.1105	8.9919	0.987	0.516619		1.2796	6.54276	1.08403	0.542406
	63.6	4.2784	5.3165	3.47366	0.925929		4.08758	4.95717	3.263	0.93323		3.21652	4.64883	2.52462	0.905945		3.32457	4.3324	2.5572	0.904611		0.8809	4.43913	0.68246	0.311415		0.96754	4.96531	0.77268	0.373005		1.10298	8.93097	0.979475	0.51268		1.27168	6.50224	1.0761	0.53844
	63.9	4.28032	5.31889	3.47558	0.926441		4.08986	4.95993	3.26528	0.933882		3.21815	4.65118	2.52625	0.906528		3.32642	4.33481	2.55905	0.905266		0.87146	4.39155	0.67302	0.307108		0.96118	4.93267	0.76632	0.369935		1.09767	8.88806	0.974175	0.509906		1.2609	6.44714	1.06533	0.533049
	64.2	4.28296	5.32217	3.47822	0.927145		4.09116	4.96151	3.26658	0.934254		3.21957	4.65324	2.52767	0.90704		3.32825	4.33719	2.56087	0.905911		0.86494	4.3587	0.6665	0.304132		0.95436	4.89767	0.7595	0.366643		1.08852	8.81397	0.965025	0.505116		1.25212	6.40228	1.05655	0.528658
	64.5	4.28278	5.32194	3.47804	0.927097		4.09216	4.96272	3.26758	0.93454		3.2198	4.65356	2.5279	0.907121		3.33027	4.33983	2.5629	0.906628		0.85648	4.31607	0.65804	0.300272		0.94376	4.84327	0.7489	0.361525		1.07835	8.73158	0.95485	0.499791		1.2436	6.35869	1.04802	0.524393
	64.8	4.28638	5.32642	3.48164	0.928056		4.09424	4.96524	3.26966	0.935134		3.22205	4.65681	2.53015	0.907928		3.3319	4.34194	2.56453	0.907202		0.849	4.27837	0.65056	0.296859		0.93788	4.8131	0.74302	0.358687		1.06797	8.64757	0.944475	0.49436		1.23445	6.3119	1.03887	0.519814
	65.1	4.28914	5.32985	3.4844	0.928792		4.09524	4.96646	3.27066	0.93542		3.22262	4.65765	2.53072	0.908134		3.3321	4.34221	2.56473	0.907273		0.84068	4.23644	0.64224	0.293062		0.93056	4.77553	0.7357	0.355153		1.05783	8.56538	0.934325	0.489047		1.22303	6.25348	1.02745	0.514098
	65.4	4.29108	5.33226	3.48634	0.929309		4.09718	4.96881	3.2726	0.935975		3.22567	4.66205	2.53377	0.909229		3.33435	4.34514	2.56697	0.908069		0.8319	4.1922	0.63346	0.289056		0.92372	4.74043	0.72886	0.351851		1.05107	8.51073	0.927575	0.485514		1.21388	6.2067	1.0183	0.509519
	65.7	4.29338	5.33511	3.48864	0.929922		4.09962	4.97177	3.27504	0.936673		3.2265	4.66325	2.5346	0.909525		3.33475	4.34566	2.56738	0.908211		0.8228	4.14634	0.62436	0.284903		0.91656	4.70368	0.7217	0.348395		1.0399	8.42024	0.9164	0.479665		1.2031	6.1516	1.00753	0.504128
	66	4.29516	5.33733	3.49042	0.930397		4.10062	4.97298	3.27604	0.936959		3.22713	4.66415	2.53523	0.909749		3.33677	4.3483	2.5694	0.908927		0.81434	4.10371	0.6159	0.281043		0.9073	4.65616	0.71244	0.343925		1.0297	8.33765	0.9062	0.474326		1.1937	6.10354	0.998125	0.499425
	66.3	4.29712	5.33976	3.49238	0.930919		4.10288	4.97572	3.2783	0.937605		3.22832	4.66588	2.53642	0.91018		3.33925	4.35152	2.57187	0.909802		0.80668	4.06511	0.60824	0.277548		0.89852	4.61111	0.70366	0.339686		1.02055	8.26356	0.89705	0.469537		1.18475	6.05778	0.989175	0.494946
	66.6	4.30022	5.34361	3.49548	0.931745		4.105	4.97829	3.28042	0.938212		3.2318	4.67091	2.5399	0.911427		3.34068	4.35338	2.5733	0.910307		0.7987	4.02489	0.60026	0.273906		0.88874	4.56092	0.69388	0.334965		1.01285	8.20121	0.88935	0.465506		1.1738	6.00179	0.978225	0.489467
	66.9	4.3023	5.3462	3.49756	0.9323		4.10598	4.97948	3.2814	0.938492		3.2318	4.67091	2.5399	0.911427		3.34267	4.35599	2.5753	0.911014		0.79072	3.98468	0.59228	0.270265		0.8809	4.52068	0.68604	0.33118		1.00285	8.12024	0.87935	0.460272		1.16383	5.95079	0.96825	0.484476
	67.2	4.30412	5.34846	3.49938	0.932785		4.10794	4.98186	3.28336	0.939053		3.2332	4.67293	2.5413	0.911929		3.34413	4.35788	2.57675	0.911527		0.78098	3.9356	0.58254	0.26582		0.87506	4.49071	0.6802	0.328361		0.992675	8.03785	0.869175	0.454946		1.15465	5.90387	0.959075	0.479885
	67.5	4.3072	5.35229	3.50246	0.933606		4.1091	4.98326	3.28452	0.939384		3.233	4.67264	2.5411	0.911857		3.34552	4.3597	2.57815	0.912022		0.772	3.89034	0.57356	0.261723		0.86756	4.45222	0.6727	0.324741		0.9831	7.96032	0.8596	0.449935		1.14672	5.86335	0.95115	0.47592
	67.8	4.30818	5.35351	3.50344	0.933867		4.11022	4.98462	3.28564	0.939705		3.23522	4.67586	2.54332	0.912656		3.3478	4.36266	2.58042	0.912827		0.76126	3.83622	0.56282	0.256822		0.85974	4.41209	0.66488	0.320965		0.975575	7.89939	0.852075	0.445996		1.13715	5.81439	0.941575	0.471129
	68.1	4.31028	5.35612	3.50554	0.934427		4.1125	4.98739	3.28792	0.940357		3.23605	4.67705	2.54415	0.912952		3.34943	4.36478	2.58205	0.913402		0.75262	3.79268	0.55418	0.252879		0.85192	4.37196	0.65706	0.31719		0.966825	7.82854	0.843325	0.441416		1.1278	5.76659	0.932225	0.466451
	68.4	4.31224	5.35855	3.5075	0.934949		4.11284	4.9878	3.28826	0.940454		3.23565	4.67647	2.54375	0.912808		3.3496	4.36501	2.58223	0.913464		0.74204	3.73937	0.5436	0.248052		0.84426	4.33265	0.6494	0.313493		0.957875	7.75607	0.834375	0.436731		1.1174	5.71341	0.921825	0.461247
	68.7	4.31372	5.36039	3.50898	0.935344		4.1143	4.98957	3.28972	0.940872		3.2377	4.67943	2.5458	0.913544		3.35142	4.36739	2.58405	0.914109		0.73454	3.70157	0.5361	0.244629		0.83844	4.30278	0.64358	0.310683		0.949125	7.68522	0.825625	0.432151		1.1097	5.67404	0.914125	0.457394
	69	4.31534	5.3624	3.5106	0.935776		4.1164	4.99212	3.29182	0.941472		3.23873	4.68091	2.54683	0.913912		3.35268	4.36902	2.5853	0.914552		0.72708	3.66398	0.52864	0.241225		0.8332	4.27589	0.63834	0.308154		0.941425	7.62287	0.817925	0.428121		1.09787	5.61358	0.9023	0.451477
	69.3	4.3178	5.36546	3.51306	0.936431		4.11754	4.9935	3.29296	0.941798		3.24052	4.68352	2.54862	0.914558		3.3543	4.37114	2.58692	0.915126		0.72038	3.63022	0.52194	0.238168		0.82606	4.23925	0.6312	0.304707		0.93325	7.55668	0.80975	0.423842		1.09015	5.57408	0.894575	0.447612
	69.6	4.32038	5.36867	3.51564	0.937119		4.119	4.99527	3.29442	0.942216		3.2426	4.68652	2.5507	0.915302		3.35652	4.37403	2.58915	0.915913		0.71192	3.58758	0.51348	0.234307		0.81886	4.2023	0.624	0.301231		0.9255	7.49393	0.802	0.419785		1.082	5.5324	0.886425	0.443534
	69.9	4.32284	5.37172	3.5181	0.937775		4.12096	4.99765	3.29638	0.942776		3.24397	4.6885	2.55207	0.915796		3.35652	4.37403	2.58915	0.915913		0.70328	3.54404	0.50484	0.230365		0.81172	4.16566	0.61686	0.297784		0.91455	7.40526	0.79105	0.414054		1.07327	5.48779	0.8777	0.439168
	70.2	4.32384	5.37297	3.5191	0.938041		4.12292	5.00002	3.29834	0.943337		3.245	4.68998	2.5531	0.916163		3.35957	4.37801	2.5922	0.916992		0.69562	3.50544	0.49718	0.22687		0.8065	4.13887	0.61164	0.295264		0.905975	7.33583	0.782475	0.409566		1.06553	5.44817	0.86995	0.435291
	70.5	4.32674	5.37657	3.522	0.938814		4.12454	5.00199	3.29996	0.9438		3.24602	4.69147	2.55412	0.916531		3.36163	4.38068	2.59425	0.917718		0.68914	3.47279	0.4907	0.223913		0.8026	4.11885	0.60774	0.293382		0.896625	7.26012	0.773125	0.404672		1.05638	5.40138	0.8608	0.430712
	70.8	4.32772	5.37779	3.52298	0.939076		4.12652	5.00439	3.30194	0.944367		3.24805	4.69439	2.55615	0.917258		3.36163	4.38068	2.59425	0.917718		0.68244	3.43902	0.484	0.220855		0.79466	4.07811	0.5998	0.289549		0.890125	7.20749	0.766625	0.401269		1.04822	5.35971	0.85265	0.426634
	71.1	4.33018	5.38084	3.52544	0.939731		4.12748	5.00555	3.3029	0.944641		3.24788	4.69414	2.55598	0.917195		3.36365	4.38332	2.59627	0.918434		0.67758	3.41453	0.47914	0.218638		0.78746	4.04116	0.5926	0.286073		0.8842	7.15951	0.7607	0.398168		1.0401	5.31816	0.844525	0.422569
	71.4	4.33326	5.38467	3.52852	0.940552		4.12908	5.00749	3.3045	0.945099		3.2513	4.69909	2.5594	0.918424		3.3649	4.38495	2.59753	0.918876		0.6709	3.38087	0.47246	0.215589		0.78308	4.01868	0.58822	0.283958		0.8763	7.09555	0.7528	0.394033		1.03215	5.27752	0.836575	0.418591
	71.7	4.33406	5.38566	3.52932	0.940766		4.13058	5.00931	3.306	0.945528		3.2505	4.69793	2.5586	0.918137		3.3657	4.38599	2.59832	0.919159		0.6626	3.33904	0.46416	0.211802		0.7772	3.9885	0.58234	0.28112		0.86855	7.03279	0.74505	0.389976		1.02543	5.24313	0.82985	0.415226
	72	4.33568	5.38768	3.53094	0.941197		4.13136	5.01026	3.30678	0.945751		3.2515	4.69938	2.5596	0.918496		3.36895	4.39023	2.60157	0.920309		0.65526	3.30206	0.45682	0.208453		0.7717	3.96028	0.57684	0.278465		0.86265	6.98502	0.73915	0.386888		1.0187	5.20874	0.823125	0.411861
	72.3	4.33814	5.39073	3.5334	0.941853		4.13334	5.01266	3.30876	0.946317		3.25235	4.70061	2.56045	0.918801		3.36955	4.39101	2.60217	0.920521		0.65056	3.27837	0.45212	0.206308		0.76582	3.9301	0.57096	0.275626		0.853475	6.91073	0.729975	0.382086		1.00998	5.16413	0.8144	0.407495
	72.6	4.33958	5.39252	3.53484	0.942237		4.13512	5.01482	3.31054	0.946826		3.25415	4.70321	2.56225	0.919447		3.36998	4.39156	2.6026	0.920671		0.64354	3.243	0.4451	0.203105		0.7593	3.89664	0.56444	0.272479		0.847575	6.86296	0.724075	0.378998		1.0006	5.1162	0.805025	0.402805
	72.9	4.34122	5.39456	3.53648	0.942674		4.13692	5.017	3.31234	0.947341		3.25603	4.70592	2.56413	0.92012		3.3728	4.39524	2.60542	0.921671		0.63656	3.20782	0.43812	0.19992		0.75278	3.86318	0.55792	0.269331		0.84065	6.80688	0.71715	0.375373		0.991825	5.07133	0.79625	0.398414
	73.2	4.3453	5.39963	3.54056	0.943762		4.13774	5.018	3.31316	0.947576		3.2548	4.70415	2.5629	0.91968		3.37425	4.39713	2.60688	0.922184		0.62986	3.17406	0.43142	0.196862		0.74662	3.83157	0.55176	0.266358		0.832725	6.74271	0.709225	0.371225		0.983125	5.02684	0.78755	0.394061
	73.5	4.34546	5.39983	3.54072	0.943804		4.13936	5.01996	3.31478	0.948039		3.25743	4.70794	2.56553	0.920622		3.37545	4.3987	2.60807	0.922608		0.62026	3.12568	0.42182	0.192482		0.7386	3.79041	0.54374	0.262486		0.8248	6.67854	0.7013	0.367077		0.97435	4.98198	0.778775	0.38967
	73.8	4.3474	5.40224	3.54266	0.944322		4.14082	5.02173	3.31624	0.948456		3.26085	4.71289	2.56895	0.921851		3.3769	4.40059	2.60953	0.923121		0.61458	3.09706	0.41614	0.18989		0.73176	3.75531	0.5369	0.259184		0.81645	6.61093	0.69295	0.362706		0.967225	4.94555	0.77165	0.386105
	74.1	4.34986	5.4053	3.54512	0.944977		4.14198	5.02314	3.3174	0.948788		3.2613	4.71354	2.5694	0.922013		3.3779	4.40189	2.61052	0.923475		0.6082	3.06491	0.40976	0.186979		0.72416	3.71631	0.5293	0.255515		0.806075	6.52692	0.682575	0.357276		0.95645	4.89045	0.760875	0.380714
	74.4	4.35132	5.40711	3.54658	0.945366		4.14342	5.02489	3.31884	0.9492		3.26273	4.7156	2.57083	0.922524		3.37913	4.40349	2.61175	0.923908		0.60074	3.02731	0.4023	0.183575		0.71814	3.68542	0.52328	0.252609		0.7965	6.44939	0.673	0.352264		0.9491	4.85287	0.753525	0.377036
	74.7	4.35328	5.40955	3.54854	0.945889		4.14474	5.02649	3.32016	0.949578		3.26435	4.71795	2.57245	0.923107		3.38135	4.40639	2.61397	0.924695		0.59356	2.99113	0.39512	0.180298		0.7139	3.66366	0.51904	0.250562		0.78835	6.3834	0.66485	0.347998		0.940575	4.80928	0.745	0.37277
	75	4.35656	5.41362	3.55182	0.946763		4.14602	5.02804	3.32144	0.949944		3.26415	4.71766	2.57225	0.923035		3.38338	4.40902	2.616	0.925412		0.58542	2.95011	0.38698	0.176584		0.70868	3.63687	0.51382	0.248042		0.7796	6.31255	0.6561	0.343418		0.93465	4.77899	0.739075	0.369806
	75.3	4.35766	5.41499	3.55292	0.947056		4.147	5.02923	3.32242	0.950224		3.26638	4.72088	2.57448	0.923834		3.3846	4.41062	2.61722	0.925845		0.57942	2.91988	0.38098	0.173846		0.70298	3.60762	0.50812	0.245291		0.77105	6.24332	0.64755	0.338943		0.9286	4.74805	0.733025	0.366778
	75.6	4.35928	5.417	3.55454	0.947488		4.14912	5.0318	3.32454	0.95083		3.26843	4.72384	2.57653	0.924569		3.38585	4.41225	2.61848	0.926287		0.57532	2.89921	0.37688	0.171975		0.6958	3.57077	0.50094	0.241825		0.7623	6.17247	0.6388	0.334363		0.918625	4.69705	0.72305	0.361787
	75.9	4.36092	5.41904	3.55618	0.947925		4.14962	5.0324	3.32504	0.950973		3.26885	4.72445	2.57695	0.924722		3.38685	4.41355	2.61947	0.926641		0.57158	2.88037	0.37314	0.170268		0.68832	3.53238	0.49346	0.238214		0.755	6.11336	0.6315	0.330542		0.9113	4.65959	0.715725	0.358122
	76.2	4.36206	5.42046	3.55732	0.948229		4.15222	5.03556	3.32764	0.951717		3.27208	4.72912	2.58018	0.925879		3.3889	4.41622	2.62153	0.927366		0.56606	2.85255	0.36762	0.16775		0.68148	3.49728	0.48662	0.234912		0.749075	6.06538	0.625575	0.32744		0.90335	4.61894	0.707775	0.354144
	76.5	4.36468	5.42371	3.55994	0.948928		4.15336	5.03694	3.32878	0.952043		3.27168	4.72854	2.57978	0.925736		3.3897	4.41727	2.62233	0.927649		0.55876	2.81576	0.36032	0.164419		0.67514	3.46474	0.48028	0.231851		0.7397	5.98947	0.6162	0.322533		0.894175	4.57203	0.6986	0.349553
	76.8	4.3663	5.42573	3.56156	0.949359		4.15418	5.03793	3.3296	0.952277		3.27188	4.72883	2.57998	0.925807		3.39135	4.41942	2.62398	0.928233		0.5519	2.78119	0.35346	0.161288		0.67058	3.44134	0.47572	0.22965		0.733825	5.9419	0.610325	0.319458		0.88765	4.53867	0.692075	0.346289
	77.1	4.36858	5.42856	3.56384	0.949967		4.15562	5.03968	3.33104	0.952689		3.27493	4.73323	2.58303	0.926902		3.39337	4.42206	2.626	0.928949		0.54864	2.76477	0.3502	0.159801		0.66504	3.41291	0.47018	0.226976		0.728925	5.90223	0.605425	0.316893		0.881575	4.50761	0.686	0.343249
	77.4	4.3717	5.43244	3.56696	0.950799		4.15808	5.04266	3.3335	0.953393		3.27493	4.73323	2.58303	0.926902		3.39498	4.42414	2.6276	0.929515		0.54374	2.74007	0.3453	0.157565		0.66062	3.39023	0.46576	0.224842		0.7216	5.84291	0.5981	0.313059		0.874025	4.469	0.67845	0.339471
	77.7	4.3707	5.4312	3.56596	0.950532		4.15904	5.04383	3.33446	0.953667		3.27718	4.73649	2.58528	0.927709		3.39703	4.42681	2.62965	0.93024		0.53448	2.69341	0.33604	0.153339		0.65558	3.36436	0.46072	0.222409		0.7151	5.79028	0.5916	0.309657		0.865875	4.42733	0.6703	0.335393
	78	4.37348	5.43465	3.56874	0.951273		4.16152	5.04684	3.33694	0.954377		3.2784	4.73826	2.5865	0.928149		3.39865	4.42893	2.63128	0.930815		0.5291	2.6663	0.33066	0.150884		0.65072	3.33942	0.45586	0.220063		0.70655	5.72105	0.58305	0.305182		0.85835	4.38885	0.662775	0.331628
	78.3	4.37492	5.43644	3.57018	0.951657		4.16312	5.04878	3.33854	0.954834		3.27778	4.73735	2.58588	0.927924		3.39947	4.43	2.6321	0.931107		0.5216	2.6285	0.32316	0.147462		0.64386	3.30422	0.449	0.216751		0.6994	5.66316	0.5759	0.301439		0.850225	4.34731	0.65465	0.327562
	78.6	4.37656	5.43848	3.57182	0.952094		4.16378	5.04958	3.3392	0.955023		3.2798	4.74028	2.5879	0.928651		3.4013	4.43238	2.63393	0.931753		0.51624	2.60149	0.3178	0.145016		0.63736	3.27086	0.4425	0.213613		0.6925	5.60729	0.569	0.297828		0.841675	4.30359	0.6461	0.323284
	78.9	4.37868	5.44111	3.57394	0.952659		4.16508	5.05115	3.3405	0.955395		3.28105	4.74209	2.58915	0.9291		3.40313	4.43476	2.63575	0.932398		0.51054	2.57277	0.3121	0.142415		0.63262	3.24654	0.43776	0.211325		0.686625	5.55972	0.563125	0.294753		0.83375	4.26307	0.638175	0.319319
	79.2	4.37982	5.44253	3.57508	0.952963		4.16706	5.05355	3.34248	0.955961		3.28165	4.74295	2.58975	0.929315		3.40375	4.43558	2.63638	0.932619		0.5058	2.54888	0.30736	0.140252		0.62712	3.21831	0.43226	0.20867		0.680925	5.51356	0.557425	0.291769		0.825375	4.22025	0.6298	0.315128
	79.5	4.38194	5.44516	3.5772	0.953528		4.1677	5.05433	3.34312	0.956144		3.28265	4.7444	2.59075	0.929674		3.40557	4.43795	2.6382	0.933265		0.4998	2.51865	0.30136	0.137514		0.6219	3.19152	0.42704	0.20615		0.674425	5.46093	0.550925	0.288367		0.8207	4.19634	0.625125	0.312789
	79.8	4.3842	5.44797	3.57946	0.954131		4.16852	5.05533	3.34394	0.956379		3.28468	4.74733	2.59278	0.930401		3.407	4.43981	2.63963	0.933769		0.49506	2.49476	0.29662	0.135351		0.61686	3.16566	0.422	0.203717		0.670525	5.42935	0.547025	0.286326		0.8156	4.17027	0.620025	0.310237
	80.1	4.38534	5.44939	3.5806	0.954435		4.1693	5.05627	3.34472	0.956602		3.28507	4.7479	2.59318	0.930544		3.40782	4.44089	2.64045	0.934061		0.49016	2.47007	0.29172	0.133116		0.61196	3.14051	0.4171	0.201352		0.6636	5.37328	0.5401	0.282701		0.809325	4.13818	0.61375	0.307098
	80.4	4.38794	5.45262	3.5832	0.955128		4.1716	5.05906	3.34702	0.95726		3.28735	4.75119	2.59545	0.93136		3.41005	4.44379	2.64268	0.934848		0.48498	2.44396	0.28654	0.130752		0.60968	3.12881	0.41482	0.200251		0.655275	5.30587	0.531775	0.278343		0.804425	4.11313	0.60885	0.304646
	80.7	4.39006	5.45525	3.58532	0.955693		4.17292	5.06066	3.34834	0.957637		3.28857	4.75296	2.59667	0.9318		3.41005	4.44379	2.64268	0.934848		0.47716	2.40456	0.27872	0.127183		0.60642	3.11208	0.41156	0.198677		0.645725	5.22854	0.522225	0.273345		0.797125	4.0758	0.60155	0.300993
	81	4.39074	5.4561	3.586	0.955874		4.17436	5.06241	3.34978	0.958049		3.28998	4.75499	2.59808	0.932302		3.41125	4.44535	2.64387	0.935272		0.47324	2.3848	0.2748	0.125395		0.60024	3.08037	0.40538	0.195694		0.639	5.17409	0.5155	0.269825		0.7912	4.04551	0.595625	0.298029
	81.3	4.39218	5.45789	3.58744	0.956258		4.17502	5.06321	3.35044	0.958238		3.29203	4.75795	2.60012	0.933038		3.41352	4.44831	2.64615	0.936077		0.47	2.36847	0.27156	0.123916		0.59632	3.06025	0.40146	0.193802		0.63145	5.11296	0.50795	0.265873		0.78575	4.01764	0.590175	0.295302
	81.6	4.3948	5.46114	3.59006	0.956956		4.17682	5.06539	3.35224	0.958753		3.29285	4.75914	2.60095	0.933334		3.41435	4.44939	2.64697	0.936369		0.46852	2.36102	0.27008	0.123241		0.59146	3.03531	0.3966	0.191455		0.62475	5.0587	0.50125	0.262366		0.7792	3.98415	0.583625	0.292024
	81.9	4.39594	5.46256	3.5912	0.95726		4.1778	5.06658	3.35322	0.959033		3.29323	4.75968	2.60133	0.933469		3.41615	4.45173	2.64878	0.937006		0.46268	2.33159	0.26424	0.120576		0.58624	3.00852	0.39138	0.188936		0.61965	5.01741	0.49615	0.259696		0.7723	3.94887	0.576725	0.288572
	82.2	4.39788	5.46497	3.59314	0.957777		4.17876	5.06774	3.35418	0.959307		3.2969	4.76499	2.605	0.934787		3.41883	4.45522	2.65145	0.937952		0.45488	2.29228	0.25644	0.117017		0.58282	2.99097	0.38796	0.187285		0.613975	4.97146	0.490475	0.256726		0.76515	3.91231	0.569575	0.284994
	82.5	4.40082	5.46862	3.59608	0.958561		4.17958	5.06874	3.355	0.959542		3.2965	4.76442	2.6046	0.934644		3.4188	4.45519	2.65143	0.937943		0.44818	2.25852	0.24974	0.11396		0.5768	2.96007	0.38194	0.184378		0.60725	4.917	0.48375	0.253206		0.75985	3.88521	0.564275	0.282342
	82.8	4.40112	5.469	3.59638	0.958641		4.1815	5.07107	3.35692	0.960091		3.29915	4.76825	2.60725	0.935595		3.42045	4.45734	2.65307	0.938527		0.44218	2.22828	0.24374	0.111222		0.57192	2.93503	0.37706	0.182023		0.60195	4.87409	0.47845	0.250432		0.751925	3.84469	0.55635	0.278377
	83.1	4.40344	5.47188	3.5987	0.959259		4.18266	5.07247	3.35808	0.960423		3.30017	4.76973	2.60827	0.935963		3.42185	4.45916	2.65448	0.939022		0.4381	2.20772	0.23966	0.10936		0.56736	2.91163	0.3725	0.179821		0.596475	4.82976	0.472975	0.247566		0.742975	3.79893	0.5474	0.273899
	83.4	4.40504	5.47387	3.6003	0.959686		4.18444	5.07463	3.35986	0.960932		3.3016	4.77179	2.6097	0.936474		3.42287	4.4605	2.6555	0.939385		0.43384	2.18625	0.2354	0.107416		0.5623	2.88566	0.36744	0.177379		0.59075	4.7834	0.46725	0.244569		0.733425	3.7501	0.53785	0.26912
	83.7	4.4039	5.47245	3.59916	0.959382		4.18526	5.07563	3.36068	0.961166		3.30365	4.77475	2.61175	0.93721		3.42592	4.46447	2.65855	0.940464		0.42736	2.1536	0.22892	0.104459		0.55534	2.84994	0.36048	0.174019		0.583025	4.72085	0.459525	0.240526		0.7269	3.71673	0.531325	0.265855
	84	4.40878	5.47851	3.60404	0.960683		4.18674	5.07742	3.36216	0.96159		3.30425	4.77562	2.61235	0.937425		3.42635	4.46503	2.65897	0.940614		0.42572	2.14533	0.22728	0.103711		0.5514	2.82972	0.35654	0.172117		0.577925	4.67955	0.454425	0.237857		0.71935	3.67813	0.523775	0.262078
	84.3	4.40896	5.47874	3.60422	0.960731		4.18788	5.0788	3.3633	0.961916		3.30425	4.77562	2.61235	0.937425		3.42755	4.46659	2.66018	0.941039		0.41904	2.11167	0.2206	0.100663		0.54506	2.79719	0.3502	0.169056		0.571625	4.62854	0.448125	0.234559		0.7145	3.65333	0.518925	0.259651
	84.6	4.41106	5.48135	3.60632	0.961291		4.18932	5.08055	3.36474	0.962328		3.30605	4.77822	2.61415	0.938071		3.4296	4.46926	2.66222	0.941764		0.41644	2.09857	0.218	0.0994762		0.5413	2.77789	0.34644	0.167241		0.567975	4.59899	0.444475	0.232649		0.7098	3.6293	0.514225	0.257299
	84.9	4.41222	5.48279	3.60748	0.9616		4.18884	5.07997	3.36426	0.96219		3.30708	4.7797	2.61517	0.938439		3.4296	4.46926	2.66222	0.941764		0.41172	2.07478	0.21328	0.0973224		0.53788	2.76034	0.34302	0.16559		0.562875	4.55769	0.439375	0.229979		0.704325	3.6013	0.50875	0.25456
	85.2	4.41366	5.48458	3.60892	0.961984		4.19062	5.08213	3.36604	0.962699		3.3083	4.78147	2.6164	0.938878		3.43202	4.47242	2.66465	0.942622		0.40714	2.0517	0.2087	0.0952324		0.5343	2.74197	0.33944	0.163862		0.559025	4.52652	0.435525	0.227964		0.698425	3.57114	0.50285	0.251607
	85.5	4.41416	5.4852	3.60942	0.962117		4.19226	5.08412	3.36768	0.963168		3.3091	4.78263	2.6172	0.939165		3.43245	4.47298	2.66507	0.942772		0.40312	2.03145	0.20468	0.0933981		0.52976	2.71867	0.3349	0.16167		0.552325	4.47227	0.428825	0.224457		0.6921	3.5388	0.496525	0.248443
	85.8	4.41724	5.48903	3.6125	0.962938		4.1939	5.0861	3.36932	0.963638		3.31055	4.78472	2.61865	0.939686		3.43427	4.47535	2.6669	0.943418		0.39788	2.00504	0.19944	0.091007		0.5255	2.69681	0.33064	0.159614		0.545575	4.41761	0.422075	0.220924		0.687025	3.51285	0.49145	0.245903
	86.1	4.4197	5.49208	3.61496	0.963594		4.19472	5.0871	3.37014	0.963872		3.31053	4.78469	2.61863	0.939677		3.4351	4.47643	2.66772	0.943709		0.3927	1.97894	0.19426	0.0886433		0.51918	2.66437	0.32432	0.156563		0.5405	4.37652	0.417	0.218267		0.682125	3.48779	0.48655	0.243452
	86.4	4.42068	5.4933	3.61594	0.963855		4.19732	5.09025	3.37274	0.964616		3.31197	4.78678	2.62007	0.940197		3.4373	4.4793	2.66993	0.944488		0.38844	1.95747	0.19	0.0866994		0.51624	2.64929	0.32138	0.155144		0.5346	4.32874	0.4111	0.215179		0.67765	3.46491	0.482075	0.241212
	86.7	4.4236	5.49693	3.61886	0.964633		4.196	5.08865	3.37142	0.964238		3.3136	4.78913	2.6217	0.94078		3.43815	4.4804	2.67077	0.944788		0.38616	1.94598	0.18772	0.085659		0.51006	2.61757	0.3152	0.15216		0.5283	4.27773	0.4048	0.211882		0.67155	3.43372	0.475975	0.23816
	87	4.42312	5.49633	3.61838	0.964505		4.19848	5.09166	3.3739	0.964947		3.31502	4.79119	2.62312	0.941291		3.44037	4.4833	2.673	0.945575		0.37998	1.91484	0.18154	0.082839		0.505	2.5916	0.31014	0.149718		0.520975	4.21842	0.397475	0.208048		0.667075	3.41084	0.4715	0.235921
	87.3	4.42588	5.49976	3.62114	0.965241		4.20042	5.09401	3.37584	0.965502		3.31665	4.79354	2.62475	0.941875		3.4416	4.4849	2.67422	0.946009		0.37886	1.90919	0.18042	0.0823279		0.49946	2.56317	0.3046	0.147043		0.51585	4.17692	0.39235	0.205365		0.662	3.38489	0.466425	0.233382
	87.6	4.42604	5.49996	3.6213	0.965284		4.20156	5.09539	3.37698	0.965828		3.31645	4.79325	2.62455	0.941803		3.44223	4.48571	2.67485	0.94623		0.37282	1.87875	0.17438	0.0795718		0.4941	2.53567	0.29924	0.144456		0.50775	4.11134	0.38425	0.201125		0.656925	3.35894	0.46135	0.230842
	87.9	4.42832	5.5028	3.62358	0.965891		4.20204	5.09598	3.37746	0.965966		3.3193	4.79737	2.6274	0.942825		3.44425	4.48835	2.67687	0.946946		0.3691	1.86001	0.17066	0.0778743		0.49004	2.51483	0.29518	0.142496		0.504275	4.0832	0.380775	0.199306		0.652	3.33376	0.456425	0.228378
	88.2	4.42994	5.50481	3.6252	0.966323		4.20318	5.09736	3.3786	0.966292		3.3183	4.79592	2.6264	0.942467		3.44508	4.48943	2.6777	0.947238		0.36792	1.85406	0.16948	0.0773359		0.48644	2.49636	0.29158	0.140758		0.497725	4.03016	0.374225	0.195878		0.6451	3.29848	0.449525	0.224926
	88.5	4.43028	5.50523	3.62554	0.966414		4.2043	5.09872	3.37972	0.966612		3.3203	4.79881	2.6284	0.943184		3.4467	4.49155	2.67932	0.947813		0.36402	1.83441	0.16558	0.0755562		0.4819	2.47306	0.28704	0.138566		0.493275	3.99413	0.369775	0.193549		0.6378	3.26115	0.442225	0.221273
	88.8	4.4321	5.50749	3.62736	0.966899		4.2058	5.10054	3.38122	0.967041		3.32238	4.80181	2.63048	0.943929		3.4485	4.49389	2.68113	0.94845		0.35962	1.81224	0.16118	0.0735485		0.47832	2.45469	0.28346	0.136838		0.487775	3.9496	0.364275	0.19067		0.633925	3.24134	0.43835	0.219334
	89.1	4.4337	5.50948	3.62896	0.967325		4.2071	5.10211	3.38252	0.967413		3.32357	4.80355	2.63167	0.94436		3.44873	4.49418	2.68135	0.948529		0.35668	1.79742	0.15824	0.0722069		0.47536	2.4395	0.2805	0.135409		0.4819	3.90202	0.3584	0.187595		0.6276	3.209	0.432025	0.216169
	89.4	4.43402	5.50988	3.62928	0.967411		4.20758	5.10269	3.383	0.96755		3.3254	4.80619	2.6335	0.945014		3.45055	4.49656	2.68317	0.949175		0.3523	1.77535	0.15386	0.0702083		0.47178	2.42112	0.27692	0.133681		0.477225	3.86417	0.353725	0.185148		0.6221	3.18088	0.426525	0.213417
	89.7	4.4363	5.51271	3.63156	0.968018		4.20938	5.10488	3.3848	0.968065		3.32662	4.80796	2.63472	0.945454		3.4522	4.49871	2.68483	0.949759		0.35036	1.76557	0.15192	0.069323		0.46936	2.4087	0.2745	0.132513		0.47415	3.83927	0.35065	0.183538		0.616775	3.15365	0.4212	0.210753
	90	4.43762	5.51435	3.63288	0.96837		4.21082	5.10662	3.38624	0.968477		3.32725	4.80886	2.63535	0.945678		3.45277	4.49946	2.6854	0.949962		0.34742	1.75076	0.14898	0.0679815		0.46286	2.37535	0.268	0.129375		0.46885	3.79636	0.34535	0.180764		0.6107	3.12259	0.415125	0.207713
	90.3	4.4381	5.51495	3.63336	0.968498		4.21082	5.10662	3.38624	0.968477		3.32885	4.81117	2.63695	0.946252		3.454	4.50106	2.68662	0.950395		0.34058	1.71629	0.14214	0.0648603		0.45828	2.35184	0.26342	0.127164		0.462575	3.74555	0.339075	0.17748		0.606825	3.10277	0.41125	0.205774
	90.6	4.44054	5.51798	3.6358	0.969149		4.2126	5.10878	3.38802	0.968986		3.33027	4.81323	2.63837	0.946764		3.45645	4.50425	2.68907	0.951262		0.33684	1.69744	0.1384	0.0631537		0.45374	2.32854	0.25888	0.124972		0.457675	3.70587	0.334175	0.174915		0.599525	3.06545	0.40395	0.202122
	90.9	4.44102	5.51858	3.63628	0.969277		4.21394	5.11041	3.38936	0.969369		3.3311	4.81442	2.6392	0.94706		3.45705	4.50503	2.68967	0.951474		0.33148	1.67043	0.13304	0.0607078		0.44836	2.30093	0.2535	0.122375		0.452175	3.66134	0.328675	0.172036		0.593625	3.03528	0.39805	0.199169
	91.2	4.44232	5.52019	3.63758	0.969623		4.21488	5.11155	3.3903	0.969638		3.33375	4.81825	2.64185	0.948011		3.46172	4.51113	2.69435	0.953128		0.32644	1.64503	0.128	0.058408		0.44394	2.27825	0.24908	0.120241		0.449325	3.63826	0.325825	0.170544		0.59055	3.01956	0.394975	0.197631
	91.5	4.44444	5.52283	3.6397	0.970188		4.21506	5.11177	3.39048	0.969689		3.33438	4.81916	2.64248	0.948235		3.45973	4.50852	2.69235	0.952421		0.3235	1.63022	0.12506	0.0570665		0.43972	2.25659	0.24486	0.118204		0.444825	3.60182	0.321325	0.168189		0.5808	2.9697	0.385225	0.192752
	91.8	4.44526	5.52385	3.64052	0.970407		4.21636	5.11334	3.39178	0.970061		3.33438	4.81916	2.64248	0.948235		3.46195	4.51142	2.69457	0.953208		0.31778	1.60139	0.11934	0.0544563		0.43646	2.23986	0.2416	0.11663		0.441	3.57085	0.3175	0.166187		0.5755	2.94261	0.379925	0.1901
	92.1	4.44804	5.5273	3.6433	0.971148		4.21752	5.11475	3.39294	0.970393		3.33597	4.82147	2.64407	0.948809		3.46235	4.51194	2.69497	0.953349		0.3147	1.58587	0.11626	0.0530509		0.4327	2.22057	0.23784	0.114815		0.4361	3.53117	0.3126	0.163622		0.569425	2.91154	0.37385	0.187061
	92.4	4.4472	5.52626	3.64246	0.970924		4.21896	5.1165	3.39438	0.970805		3.337	4.82295	2.6451	0.949177		3.46298	4.51275	2.6956	0.95357		0.3098	1.56118	0.11136	0.050815		0.43028	2.20815	0.23542	0.113647		0.432625	3.50304	0.309125	0.161803		0.5645	2.88636	0.368925	0.184596
	92.7	4.4493	5.52887	3.64456	0.971484		4.21928	5.11688	3.3947	0.970896		3.3423	4.83061	2.6504	0.951079		3.4646	4.51487	2.69722	0.954145		0.30606	1.54233	0.10762	0.0491084		0.4262	2.18721	0.23134	0.111678		0.43325	3.5081	0.30975	0.16213		0.5621	2.87409	0.366525	0.183395
	93	4.45064	5.53053	3.6459	0.971841		4.2206	5.11848	3.39602	0.971274		3.33922	4.82617	2.64732	0.949975		3.4656	4.51618	2.69822	0.954499		0.3033	1.52842	0.10486	0.0478489		0.42132	2.16217	0.22646	0.109322		0.425725	3.44717	0.302225	0.158192		0.557375	2.84993	0.3618	0.181031
	93.3	4.45178	5.53195	3.64704	0.972145		4.22206	5.12026	3.39748	0.971691		3.34043	4.8279	2.64852	0.950406		3.4658	4.51644	2.69842	0.95457		0.30118	1.51774	0.10274	0.0468816		0.41792	2.14472	0.22306	0.10768		0.42165	3.41417	0.29815	0.156059		0.5521	2.82296	0.356525	0.178392
	93.6	4.45308	5.53356	3.64834	0.972491		4.22256	5.12086	3.39798	0.971834		3.3423	4.83061	2.6504	0.951079		3.46685	4.5178	2.69948	0.954941		0.29824	1.50292	0.0998	0.04554		0.41318	2.12039	0.21832	0.105392		0.41575	3.3664	0.29225	0.15297		0.54865	2.80532	0.353075	0.176666
	93.9	4.45452	5.53535	3.64978	0.972875		4.22436	5.12304	3.39978	0.972349		3.34413	4.83325	2.65223	0.951734		3.46825	4.51963	2.70087	0.955436		0.29598	1.49153	0.09754	0.0445087		0.41026	2.10541	0.2154	0.103983		0.412475	3.33988	0.288975	0.151256		0.54375	2.78026	0.348175	0.174214
	94.2	4.45682	5.53821	3.65208	0.973488		4.22548	5.1244	3.4009	0.97267		3.34495	4.83444	2.65305	0.95203		3.46825	4.51963	2.70087	0.955436		0.29404	1.48176	0.0956	0.0436235		0.40618	2.08447	0.21132	0.102013		0.4064	3.29069	0.2829	0.148076		0.540075	2.76147	0.3445	0.172375
	94.5	4.45682	5.53821	3.65208	0.973488		4.2263	5.1254	3.40172	0.972904		3.34638	4.8365	2.65448	0.952541		3.47107	4.52331	2.7037	0.956436		0.29092	1.46604	0.09248	0.0421998		0.40372	2.07185	0.20886	0.100825		0.4005	3.24291	0.277	0.144988		0.536225	2.74179	0.34065	0.170449
	94.8	4.4596	5.54167	3.65486	0.974229		4.22776	5.12717	3.40318	0.973322		3.34698	4.83737	2.65508	0.952756		3.47213	4.52468	2.70475	0.956807		0.28732	1.44789	0.08888	0.0405571		0.39952	2.05029	0.20466	0.098798		0.3966	3.21134	0.2731	0.142947		0.530525	2.71264	0.33495	0.167597
	95.1	4.45892	5.54082	3.65418	0.974048		4.22794	5.12739	3.40336	0.973373		3.34698	4.83737	2.65508	0.952756		3.47332	4.52624	2.70595	0.957232		0.28212	1.42169	0.08368	0.0381842		0.39366	2.02022	0.1988	0.0959691		0.39235	3.17692	0.26885	0.140722		0.52725	2.6959	0.331675	0.165958
	95.4	4.46056	5.54286	3.65582	0.974485		4.22906	5.12874	3.40448	0.973693		3.35003	4.84178	2.65813	0.953851		3.4752	4.52869	2.70783	0.957895		0.27968	1.40939	0.08124	0.0370708		0.39184	2.01088	0.19698	0.0950905		0.389475	3.15364	0.265975	0.139217		0.5236	2.67723	0.328025	0.164131
	95.7	4.46266	5.54547	3.65792	0.975045		4.22972	5.12954	3.40514	0.973882		3.35127	4.84358	2.65937	0.954299		3.47518	4.52865	2.7078	0.957886		0.27694	1.39559	0.0785	0.0358205		0.38908	1.99672	0.19422	0.0937581		0.384825	3.11599	0.261325	0.136784		0.516675	2.64183	0.3211	0.160666
	96	4.46284	5.54569	3.6581	0.975093		4.23084	5.1309	3.40626	0.974202		3.35145	4.84384	2.65955	0.954362		3.4762	4.52999	2.70883	0.958249		0.27236	1.37251	0.07392	0.0337306		0.38406	1.97095	0.1892	0.0913348		0.38015	3.07814	0.25665	0.134337		0.51525	2.63454	0.319675	0.159953
	96.3	4.46446	5.5477	3.65972	0.975525		4.23134	5.13151	3.40676	0.974345		3.35248	4.84532	2.66058	0.95473		3.47843	4.53289	2.71105	0.959036		0.26976	1.3594	0.07132	0.0325442		0.37964	1.94827	0.18478	0.0892011		0.37665	3.0498	0.25315	0.132505		0.5124	2.61997	0.316825	0.158527
	96.6	4.46642	5.55014	3.66168	0.976047		4.23184	5.13212	3.40726	0.974488		3.35308	4.84618	2.66118	0.954945		3.47985	4.53475	2.71247	0.95954		0.26634	1.34217	0.0679	0.0309836		0.37642	1.93175	0.18156	0.0876466		0.37405	3.02874	0.25055	0.131144		0.506125	2.58788	0.31055	0.155388
	96.9	4.46694	5.55079	3.6622	0.976186		4.23346	5.13408	3.40888	0.974952		3.3551	4.84911	2.6632	0.955672		3.4813	4.53663	2.71393	0.960053		0.26376	1.32917	0.06532	0.0298063		0.3733	1.91573	0.17844	0.0861405		0.370375	2.99899	0.246875	0.12922		0.504475	2.57945	0.3089	0.154562
	97.2	4.46758	5.55158	3.66284	0.976356		4.23492	5.13585	3.41034	0.975369		3.35672	4.85146	2.66482	0.956255		3.48353	4.53953	2.71615	0.96084		0.26146	1.31758	0.06302	0.0287568		0.37282	1.91327	0.17796	0.0859088		0.3663	2.96599	0.2428	0.127087		0.5014	2.56372	0.305825	0.153023
	97.5	4.46984	5.55439	3.6651	0.976959		4.2354	5.13643	3.41082	0.975507		3.35672	4.85146	2.66482	0.956255		3.48393	4.54006	2.71655	0.960981		0.2597	1.30871	0.06126	0.0279537		0.37088	1.90332	0.17602	0.0849722		0.36245	2.93482	0.23895	0.125072		0.49795	2.54608	0.302375	0.151297
	97.8	4.46918	5.55357	3.66444	0.976783		4.23588	5.13702	3.4113	0.975644		3.35878	4.85442	2.66688	0.956991		3.48555	4.54217	2.71818	0.961556		0.25706	1.2954	0.05862	0.026749		0.36776	1.8873	0.1729	0.0834661		0.358775	2.90506	0.235275	0.123148		0.494725	2.52959	0.29915	0.149684
	98.1	4.47082	5.55561	3.66608	0.97722		4.23786	5.13942	3.41328	0.97621		3.35918	4.855	2.66728	0.957134		3.48637	4.54325	2.719	0.961848		0.25268	1.27333	0.05424	0.0247504		0.36386	1.86729	0.169	0.0815834		0.3549	2.87368	0.2314	0.12112		0.4884	2.49725	0.292825	0.146519
	98.4	4.47162	5.5566	3.66688	0.977433		4.23868	5.14041	3.4141	0.976445		3.36043	4.85681	2.66852	0.957583		3.48637	4.54325	2.719	0.961848		0.24908	1.25519	0.05064	0.0231077		0.36012	1.8481	0.16526	0.0797779		0.351675	2.84757	0.228175	0.119432		0.484525	2.47744	0.28895	0.14458
	98.7	4.47326	5.55864	3.66852	0.97787		4.23964	5.14158	3.41506	0.976719		3.36302	4.86057	2.67112	0.958516		3.48838	4.54585	2.721	0.962555		0.24582	1.23876	0.04738	0.0216201		0.35784	1.8364	0.16298	0.0786773		0.3492	2.82753	0.2257	0.118137		0.48045	2.4566	0.284875	0.142541
	99	4.47538	5.56127	3.67064	0.978436		4.24044	5.14255	3.41586	0.976948		3.36305	4.8606	2.67115	0.958525		3.48882	4.54644	2.72145	0.962715		0.2424	1.22153	0.04396	0.0200595		0.3559	1.82644	0.16104	0.0777408		0.34455	2.78988	0.22105	0.115703		0.47355	2.42132	0.277975	0.139088
	99.3	4.47538	5.56127	3.67064	0.978436		4.2403	5.14238	3.41572	0.976908		3.36345	4.86118	2.67155	0.958668		3.49063	4.54879	2.72325	0.963351		0.23964	1.20762	0.0412	0.0188001		0.35314	1.81228	0.15828	0.0764084		0.3382	2.73846	0.2147	0.112379		0.468275	2.39435	0.2727	0.136449
	99.6	4.47814	5.5647	3.6734	0.979171		4.24162	5.14398	3.41704	0.977286		3.36468	4.86295	2.67278	0.959108		3.49207	4.55068	2.7247	0.963864		0.2403	1.21095	0.04186	0.0191012		0.35052	1.79883	0.15566	0.0751436		0.33495	2.71215	0.21145	0.110678		0.463575	2.37032	0.268	0.134097
	99.9	4.47878	5.5655	3.67404	0.979342		4.24144	5.14376	3.41686	0.977234		3.3661	4.86501	2.6742	0.959619		3.49185	4.55038	2.72447	0.963785		0.23444	1.18142	0.036	0.0164273		0.34644	1.77789	0.15158	0.073174		0.3321	2.68907	0.2086	0.109186		0.460525	2.35472	0.26495	0.132571
	100.2	4.47846	5.5651	3.67372	0.979257		4.24322	5.14592	3.41864	0.977743		3.3669	4.86617	2.675	0.959906		3.49452	4.55387	2.72715	0.964731		0.23102	1.16418	0.03258	0.0148667		0.34432	1.76701	0.14946	0.0721506		0.32845	2.65951	0.20495	0.107276		0.456875	2.33606	0.2613	0.130745
	100.5	4.48042	5.56754	3.67568	0.979779		4.24436	5.1473	3.41978	0.978069		3.3669	4.86617	2.675	0.959906		3.49553	4.55517	2.72815	0.965085		0.22972	1.15763	0.03128	0.0142735		0.34074	1.74864	0.14588	0.0704224		0.3238	2.62186	0.2003	0.104842		0.4538	2.32034	0.258225	0.129206
	100.8	4.4806	5.56776	3.67586	0.979827		4.24502	5.1481	3.42044	0.978258		3.36833	4.86823	2.67643	0.960418		3.49593	4.55569	2.72855	0.965226		0.22644	1.1411	0.028	0.0127768		0.33782	1.73365	0.14296	0.0690128		0.32155	2.60364	0.19805	0.103664		0.4489	2.29528	0.253325	0.126754
	101.1	4.48126	5.56858	3.67652	0.980003		4.24484	5.14788	3.42026	0.978207		3.36912	4.86938	2.67722	0.960705		3.49693	4.557	2.72955	0.96558		0.22532	1.13546	0.02688	0.0122657		0.33568	1.72267	0.14082	0.0679797		0.3189	2.58219	0.1954	0.102277		0.446475	2.28288	0.2509	0.125541
	101.4	4.48288	5.57059	3.67814	0.980435		4.24664	5.15006	3.42206	0.978721		3.37078	4.87177	2.67888	0.961297		3.49835	4.55885	2.73097	0.966084		0.2219	1.11822	0.02346	0.0107051		0.33244	1.70605	0.13758	0.0664156		0.316225	2.56053	0.192725	0.100877		0.446475	2.28288	0.2509	0.125541
	101.7	4.48352	5.57139	3.67878	0.980605		4.24616	5.14948	3.42158	0.978584		3.37018	4.8709	2.67828	0.961082		3.49858	4.55915	2.7312	0.966164		0.22076	1.11248	0.02232	0.0101849		0.3287	1.68685	0.13384	0.0646102		0.309725	2.50789	0.186225	0.0974745		0.441825	2.25911	0.24625	0.123214
	102	4.48352	5.57139	3.67878	0.980605		4.24776	5.15142	3.42318	0.979042		3.372	4.87354	2.6801	0.961737		3.50082	4.56208	2.73345	0.96696		0.22026	1.10996	0.02182	0.00995674		0.32658	1.67597	0.13172	0.0635868		0.305075	2.47024	0.181575	0.0950406		0.4402	2.2508	0.244625	0.122401
	102.3	4.48612	5.57462	3.68138	0.981298		4.24924	5.15322	3.42466	0.979465		3.37365	4.87592	2.68175	0.962329		3.5014	4.56283	2.73402	0.967163		0.22044	1.11086	0.022	0.0100389		0.32218	1.65339	0.12732	0.0614627		0.302	2.44534	0.1785	0.093431		0.435925	2.22894	0.24035	0.120262
	102.6	4.4871	5.57584	3.68236	0.98156		4.2499	5.15402	3.42532	0.979654		3.37545	4.87852	2.68355	0.962975		3.50163	4.56312	2.73425	0.967243		0.21782	1.09766	0.01938	0.00884334		0.32008	1.64262	0.12522	0.060449		0.297525	2.40911	0.174025	0.0910887		0.429175	2.19443	0.2336	0.116885
	102.9	4.48744	5.57626	3.6827	0.98165		4.24972	5.1538	3.42514	0.979602		3.37545	4.87852	2.68355	0.962975		3.50347	4.56553	2.7361	0.967897		0.21424	1.07962	0.0158	0.00720974		0.31696	1.6266	0.1221	0.0589428		0.29365	2.37773	0.17015	0.0890605		0.425725	2.17679	0.23015	0.115158
	103.2	4.48922	5.57847	3.68448	0.982125		4.25088	5.15521	3.4263	0.979934		3.37688	4.88058	2.68498	0.963486		3.50367	4.56579	2.7363	0.967968		0.21262	1.07146	0.01418	0.00647051		0.31374	1.61008	0.11888	0.0573884		0.291625	2.36134	0.168125	0.0880005		0.4237	2.16643	0.228125	0.114145
	103.5	4.48954	5.57887	3.6848	0.98221		4.2512	5.15559	3.42662	0.980026		3.3779	4.88206	2.686	0.963854		3.50407	4.56631	2.7367	0.968109		0.20936	1.05503	0.01092	0.00498293		0.31258	1.60413	0.11772	0.0568284		0.28775	2.32996	0.16425	0.0859723		0.420225	2.14866	0.22465	0.112406
	103.8	4.49116	5.58088	3.68642	0.982642		4.25314	5.15795	3.42856	0.98058		3.37913	4.88383	2.68723	0.964293		3.5061	4.56895	2.73873	0.968826		0.20758	1.04606	0.00914	0.0041707		0.31176	1.59992	0.1169	0.0564325		0.284275	2.30182	0.160775	0.0841534		0.41715	2.13294	0.221575	0.110868
	104.1	4.49148	5.58128	3.68674	0.982727		4.25364	5.15855	3.42906	0.980723		3.3785	4.88293	2.6866	0.964069		3.50652	4.56951	2.73915	0.968976		0.20564	1.03628	0.0072	0.00328545		0.30882	1.58483	0.11396	0.0550133		0.281825	2.28198	0.158325	0.082871		0.413325	2.11338	0.21775	0.108954
	104.4	4.49164	5.58148	3.6869	0.98277		4.25494	5.16013	3.43036	0.981095		3.38015	4.88532	2.68825	0.964661		3.50752	4.57081	2.74015	0.96933		0.20496	1.03286	0.00652	0.00297516		0.30542	1.56738	0.11056	0.053372		0.279425	2.26255	0.155925	0.0816148		0.4086	2.08922	0.213025	0.10659
	104.7	4.49198	5.5819	3.68724	0.98286		4.2566	5.16214	3.43202	0.98157		3.38055	4.88589	2.68865	0.964805		3.50835	4.57188	2.74098	0.969622		0.20254	1.02066	0.0041	0.00187088		0.30394	1.55979	0.10908	0.0526575		0.27635	2.23765	0.15285	0.0800052		0.4023	2.05701	0.206725	0.103437
	105	4.4941	5.58454	3.68936	0.983425		4.25756	5.16331	3.43298	0.981844		3.38218	4.88824	2.69028	0.965388		3.50937	4.57322	2.742	0.969984		0.19748	0.995162	-0.00096	-0.00043806		0.30086	1.54398	0.106	0.0511706		0.2727	2.2081	0.1492	0.0780947		0.399475	2.04257	0.2039	0.102024
	105.3	4.49476	5.58536	3.69002	0.983601		4.25788	5.1637	3.4333	0.981936		3.38357	4.89027	2.69168	0.96589		3.51078	4.57504	2.7434	0.97048		0.19552	0.985285	-0.00292	-0.00133243		0.29792	1.52889	0.10306	0.0497514		0.271875	2.20142	0.148375	0.0776629		0.3958	2.02378	0.200225	0.100185
	105.6	4.4959	5.58677	3.69116	0.983905		4.25932	5.16544	3.43474	0.982348		3.38442	4.89149	2.69252	0.966195		3.5114	4.57586	2.74403	0.970701		0.1934	0.974602	-0.00504	-0.00229982		0.2942	1.5098	0.09934	0.0479556		0.271675	2.1998	0.148175	0.0775582		0.3903	1.99565	0.194725	0.0974331
	105.9	4.49558	5.58638	3.69084	0.98382		4.26	5.16627	3.43542	0.982542		3.38463	4.89178	2.69272	0.966267		3.51098	4.57531	2.7436	0.97055		0.18918	0.953336	-0.00926	-0.00422545		0.29304	1.50385	0.09818	0.0473956		0.2676	2.1668	0.1441	0.0754253		0.387475	1.98121	0.1919	0.0960196
	106.2	4.49686	5.58797	3.69212	0.984161		4.25984	5.16607	3.43526	0.982497		3.38605	4.89384	2.69415	0.966778		3.51403	4.57928	2.74665	0.971629		0.18788	0.946785	-0.01056	-0.00481866		0.29126	1.49471	0.0964	0.0465363		0.2664	2.15709	0.1429	0.0747972		0.387875	1.98325	0.1923	0.0962198
	106.5	4.498	5.58938	3.69326	0.984465		4.26064	5.16704	3.43606	0.982725		3.38747	4.8959	2.69557	0.96729		3.51363	4.57876	2.74625	0.971488		0.18838	0.949305	-0.01006	-0.00459051		0.2901	1.48876	0.09524	0.0459763		0.265775	2.15202	0.142275	0.07447		0.38545	1.97086	0.189875	0.0950064
	106.8	4.49702	5.58817	3.69228	0.984204		4.26064	5.16704	3.43606	0.982725		3.38828	4.89706	2.69638	0.967577		3.51423	4.57954	2.74685	0.9717		0.18542	0.934388	-0.01302	-0.00594119		0.2906	1.49133	0.09574	0.0462177		0.26415	2.13887	0.14065	0.0736195		0.3838	1.96242	0.188225	0.0941808
	107.1	4.49928	5.59097	3.69454	0.984806		4.26096	5.16743	3.43638	0.982817		3.3893	4.89854	2.6974	0.967945		3.5163	4.58224	2.74892	0.972434		0.1848	0.931264	-0.01364	-0.0062241		0.28912	1.48373	0.09426	0.0455033		0.25865	2.09433	0.13515	0.0707406		0.382775	1.95718	0.1872	0.0936679
	107.4	4.49978	5.59159	3.69504	0.98494		4.26212	5.16884	3.43754	0.983149		3.3899	4.89941	2.698	0.96816		3.5165	4.58251	2.74912	0.972505		0.1825	0.919673	-0.01594	-0.00727362		0.28654	1.47049	0.09168	0.0442578		0.25745	2.08462	0.13395	0.0701125		0.38035	1.94478	0.184775	0.0924545
	107.7	4.50352	5.59624	3.69878	0.985936		4.26228	5.16903	3.4377	0.983194		3.3899	4.89941	2.698	0.96816		3.51772	4.5841	2.75035	0.972938		0.18346	0.924511	-0.01498	-0.00683556		0.28182	1.44627	0.08696	0.0419792		0.2552	2.0664	0.1317	0.0689348		0.3789	1.93736	0.183325	0.091729
	108	4.50206	5.59443	3.69732	0.985547		4.26308	5.17	3.4385	0.983423		3.39213	4.90262	2.70023	0.968958		3.51892	4.58567	2.75155	0.973363		0.1799	0.906571	-0.01854	-0.00846004		0.27934	1.43354	0.08448	0.040782		0.250925	2.03178	0.127425	0.0666972		0.3783	1.9343	0.182725	0.0914288
	108.3	4.50224	5.59465	3.6975	0.985595		4.26438	5.17158	3.4398	0.983795		3.39213	4.90262	2.70023	0.968958		3.51975	4.58674	2.75237	0.973654		0.1776	0.894981	-0.02084	-0.00950956		0.2761	1.41691	0.08124	0.039218		0.2495	2.02024	0.126	0.0659513		0.3781	1.93327	0.182525	0.0913287
	108.6	4.50418	5.59706	3.69944	0.986112		4.26488	5.17218	3.4403	0.983938		3.39398	4.9053	2.70207	0.969622		3.51973	4.58671	2.75235	0.973646		0.17566	0.885205	-0.02278	-0.0103948		0.274	1.40614	0.07914	0.0382042		0.248275	2.01032	0.124775	0.0653101		0.373825	1.91142	0.17825	0.0891897
	108.9	4.50534	5.5985	3.7006	0.986422		4.26604	5.17359	3.44146	0.98427		3.395	4.90678	2.7031	0.96999		3.522	4.58967	2.75462	0.97445		0.175	0.881879	-0.02344	-0.010696		0.27332	1.40265	0.07846	0.0378759		0.2458	1.99028	0.1223	0.0640147		0.372625	1.90528	0.17705	0.0885892
	109.2	4.50614	5.5995	3.7014	0.986635		4.26732	5.17514	3.44274	0.984636		3.3954	4.90736	2.7035	0.970133		3.52177	4.58938	2.7544	0.974371		0.1755	0.884398	-0.02294	-0.0104678		0.2735	1.40357	0.07864	0.0379628		0.24195	1.95911	0.11845	0.0619995		0.36835	1.88342	0.172775	0.0864502
	109.5	4.50632	5.59972	3.70158	0.986683		4.26716	5.17495	3.44258	0.98459		3.39703	4.90971	2.70512	0.970717		3.52462	4.59309	2.75725	0.975379		0.17356	0.874622	-0.02488	-0.0113531		0.27104	1.39095	0.07618	0.0367753		0.240525	1.94757	0.117025	0.0612536		0.366325	1.87307	0.17075	0.0854369
	109.8	4.50746	5.60114	3.70272	0.986987		4.26844	5.1765	3.44386	0.984956		3.39725	4.91003	2.70535	0.970797		3.52502	4.59361	2.75765	0.97552		0.16994	0.85638	-0.0285	-0.0130049		0.26892	1.38007	0.07406	0.0357519		0.237675	1.92449	0.114175	0.0597618		0.361625	1.84903	0.16605	0.0830852
	110.1	4.5068	5.60032	3.70206	0.986811		4.26862	5.17672	3.44404	0.985008		3.39785	4.9109	2.70595	0.971013		3.52565	4.59443	2.75827	0.975742		0.16768	0.844991	-0.03076	-0.0140362		0.26556	1.36282	0.0707	0.0341299		0.23565	1.9081	0.11215	0.0587019		0.35815	1.83127	0.162575	0.0813465
	110.4	4.50826	5.60213	3.70352	0.9872		4.26908	5.17728	3.4445	0.985139		3.39905	4.91263	2.70715	0.971443		3.52687	4.59603	2.7595	0.976175		0.16344	0.823624	-0.035	-0.0159709		0.26226	1.34589	0.0674	0.0325368		0.2316	1.8753	0.1081	0.056582		0.358375	1.83242	0.1628	0.0814591
	110.7	4.50956	5.60375	3.70482	0.987546		4.26992	5.1783	3.44534	0.985379		3.39988	4.91382	2.70797	0.971739		3.52687	4.59603	2.7595	0.976175		0.162	0.816368	-0.03644	-0.016628		0.2598	1.33326	0.06494	0.0313493		0.227725	1.84393	0.104225	0.0545538		0.353475	1.80736	0.1579	0.0790073
	111	4.50924	5.60335	3.7045	0.987461		4.27024	5.17868	3.44566	0.985471		3.40172	4.9165	2.70982	0.972403		3.5281	4.59762	2.76072	0.976608		0.15742	0.793288	-0.04102	-0.0187179		0.2569	1.31838	0.06204	0.0299493		0.227725	1.84393	0.104225	0.0545538		0.351825	1.79893	0.15625	0.0781817
	111.3	4.50892	5.60295	3.70418	0.987376		4.27074	5.17929	3.44616	0.985614		3.40232	4.91737	2.71042	0.972618		3.5287	4.5984	2.76132	0.97682		0.15742	0.793288	-0.04102	-0.0187179		0.25494	1.30832	0.06008	0.0290031		0.225475	1.82571	0.101975	0.0533761		0.3492	1.7855	0.153625	0.0768682
	111.6	4.51102	5.60556	3.70628	0.987936		4.27252	5.18145	3.44794	0.986123		3.40373	4.91939	2.71183	0.973121		3.5299	4.59997	2.76253	0.977245		0.15906	0.801552	-0.03938	-0.0179696		0.25574	1.31243	0.06088	0.0293893		0.223475	1.80951	0.099975	0.0523292		0.347775	1.77822	0.1522	0.0761552
	111.9	4.51234	5.6072	3.7076	0.988287		4.27284	5.18184	3.44826	0.986215		3.40477	4.92091	2.71287	0.973498		3.53152	4.60209	2.76415	0.97782		0.15794	0.795908	-0.0405	-0.0184807		0.2546	1.30658	0.05974	0.028839		0.222625	1.80263	0.099125	0.0518843		0.344325	1.76058	0.14875	0.074429
	112.2	4.513	5.60802	3.70826	0.988463		4.27302	5.18206	3.44844	0.986266		3.40435	4.92029	2.71245	0.973345		3.53092	4.6013	2.76355	0.977608		0.15728	0.792582	-0.04116	-0.0187818		0.25284	1.29755	0.05798	0.0279894		0.21915	1.77449	0.09565	0.0500654		0.3431	1.75431	0.147525	0.073816
	112.5	4.513	5.60802	3.70826	0.988463		4.27448	5.18383	3.4499	0.986684		3.405	4.92123	2.7131	0.973578		3.53238	4.60319	2.765	0.978121		0.15548	0.783511	-0.04296	-0.0196032		0.2515	1.29067	0.05664	0.0273425		0.213675	1.73016	0.090175	0.0471997		0.342275	1.7501	0.1467	0.0734032
	112.8	4.51364	5.60882	3.7089	0.988634		4.274	5.18324	3.44942	0.986546		3.4064	4.92325	2.7145	0.974081		3.53377	4.60502	2.7664	0.978616		0.15546	0.783411	-0.04298	-0.0196123		0.24992	1.28256	0.05506	0.0265798		0.21165	1.71377	0.08815	0.0461398		0.34005	1.73872	0.144475	0.0722899
	113.1	4.51462	5.61004	3.70988	0.988895		4.27578	5.1854	3.4512	0.987055		3.4072	4.92441	2.7153	0.974368		3.53498	4.60658	2.7676	0.97904		0.15384	0.775247	-0.0446	-0.0203515		0.24858	1.27569	0.05372	0.0259329		0.2096	1.69717	0.0861	0.0450667		0.338425	1.73041	0.14285	0.0714768
	113.4	4.5161	5.61187	3.71136	0.98929		4.27626	5.18599	3.45168	0.987193		3.407	4.92412	2.7151	0.974296		3.53498	4.60658	2.7676	0.97904		0.15222	0.767083	-0.04622	-0.0210908		0.24762	1.27076	0.05276	0.0254695		0.206975	1.67591	0.083475	0.0436928		0.33455	1.7106	0.138975	0.0695379
	113.7	4.5159	5.61163	3.71116	0.989236		4.27514	5.18463	3.45056	0.986872		3.40802	4.9256	2.71612	0.974664		3.53642	4.60847	2.76905	0.979553		0.15256	0.768797	-0.04588	-0.0209356		0.24728	1.26901	0.05242	0.0253053		0.20555	1.66437	0.08205	0.0429469		0.331325	1.69411	0.13575	0.0679242
	114	4.51772	5.61389	3.71298	0.989722		4.27676	5.18659	3.45218	0.987336		3.40903	4.92705	2.71712	0.975023		3.53705	4.60928	2.76967	0.979774		0.15334	0.772727	-0.0451	-0.0205797		0.24534	1.25906	0.05048	0.0243688		0.202475	1.63947	0.078975	0.0413373		0.32745	1.67429	0.131875	0.0659853
	114.3	4.51772	5.61389	3.71298	0.989722		4.27726	5.1872	3.45268	0.987479		3.41005	4.92853	2.71815	0.975391		3.53742	4.60977	2.77005	0.979907		0.15224	0.767184	-0.0462	-0.0210816		0.2429	1.24654	0.04804	0.0231909		0.201275	1.62976	0.077775	0.0407092		0.32705	1.67225	0.131475	0.0657852
	114.6	4.51836	5.61468	3.71362	0.989892		4.27838	5.18856	3.4538	0.987799		3.4117	4.93091	2.7198	0.975983		3.53788	4.61036	2.7705	0.980066		0.15402	0.776154	-0.04442	-0.0202694		0.23916	1.22734	0.0443	0.0213855		0.201875	1.63462	0.078375	0.0410233		0.32255	1.64924	0.126975	0.0635336
	114.9	4.5195	5.6161	3.71476	0.990196		4.27856	5.18877	3.45398	0.987851		3.4121	4.93149	2.7202	0.976126		3.53682	4.60899	2.76945	0.979695		0.15172	0.764564	-0.04672	-0.0213189		0.23704	1.21646	0.04218	0.0203621		0.201875	1.63462	0.078375	0.0410233		0.32175	1.64515	0.126175	0.0631333
	115.2	4.51916	5.61568	3.71442	0.990105		4.27886	5.18914	3.45428	0.987936		3.4131	4.93294	2.7212	0.976485		3.53845	4.61111	2.77108	0.98027		0.1506	0.75892	-0.04784	-0.02183		0.23508	1.2064	0.04022	0.0194159		0.1974	1.59838	0.0739	0.038681		0.3191	1.6316	0.123525	0.0618073
	115.5	4.51998	5.6167	3.71524	0.990324		4.27904	5.18936	3.45446	0.987988		3.41392	4.93413	2.72202	0.976781		3.5405	4.61378	2.77312	0.980995		0.14816	0.746624	-0.05028	-0.0229434		0.23296	1.19552	0.0381	0.0183925		0.19495	1.57854	0.07145	0.0373986		0.31685	1.62009	0.121275	0.0606815
	115.8	4.52016	5.61692	3.71542	0.990372		4.27954	5.18996	3.45496	0.988131		3.41455	4.93503	2.72265	0.977005		3.5403	4.61352	2.77292	0.980924		0.14588	0.735134	-0.05256	-0.0239838		0.23118	1.18639	0.03632	0.0175332		0.192525	1.55891	0.069025	0.0361293		0.314425	1.6077	0.11885	0.0594681
	116.1	4.5205	5.61734	3.71576	0.990463		4.28018	5.19074	3.4556	0.988314		3.41595	4.93706	2.72405	0.977508		3.53987	4.61297	2.7725	0.980774		0.14552	0.73332	-0.05292	-0.0241481		0.23184	1.18978	0.03698	0.0178518		0.193525	1.567	0.070025	0.0366527		0.312775	1.59926	0.1172	0.0586425
	116.4	4.52194	5.61913	3.7172	0.990846		4.28082	5.19152	3.45624	0.988497		3.41775	4.93966	2.72585	0.978154		3.54173	4.61538	2.77435	0.981428		0.14442	0.727777	-0.05402	-0.02465		0.22972	1.1789	0.03486	0.0168284		0.194375	1.57389	0.070875	0.0370976		0.312375	1.59721	0.1168	0.0584424
	116.7	4.52162	5.61873	3.71688	0.990761		4.28196	5.1929	3.45738	0.988823		3.41737	4.93912	2.72547	0.978019		3.54093	4.61433	2.77355	0.981145		0.14246	0.7179	-0.05598	-0.0255444		0.22632	1.16145	0.03146	0.0151871		0.190875	1.54555	0.067375	0.0352656		0.310525	1.58775	0.11495	0.0575167
	117	4.52258	5.61993	3.71784	0.991017		4.28164	5.19251	3.45706	0.988731		3.4182	4.94031	2.7263	0.978315		3.54438	4.61883	2.777	0.982366		0.13936	0.702278	-0.05908	-0.026959		0.22304	1.14462	0.02818	0.0136037		0.18905	1.53077	0.06555	0.0343104		0.312175	1.59619	0.1166	0.0583423
	117.3	4.52308	5.62055	3.71834	0.99115		4.28212	5.19309	3.45754	0.988869		3.4184	4.9406	2.7265	0.978387		3.54395	4.61828	2.77657	0.982215		0.1361	0.68585	-0.06234	-0.0284465		0.22208	1.13969	0.02722	0.0131402		0.1854	1.50121	0.0619	0.0323999		0.310575	1.58801	0.115	0.0575417
	117.6	4.52324	5.62075	3.7185	0.991193		4.28344	5.19469	3.45886	0.989246		3.419	4.94147	2.7271	0.978602		3.54395	4.61828	2.77657	0.982215		0.13446	0.677585	-0.06398	-0.0291949		0.22092	1.13374	0.02606	0.0125803		0.182125	1.4747	0.058625	0.0306857		0.309525	1.58264	0.11395	0.0570163
	117.9	4.52422	5.62196	3.71948	0.991454		4.28344	5.19469	3.45886	0.989246		3.4194	4.94204	2.7275	0.978746		3.546	4.62095	2.77862	0.98294		0.13186	0.664483	-0.06658	-0.0303813		0.22208	1.13969	0.02722	0.0131402		0.1803	1.45992	0.0568	0.0297304		0.309925	1.58469	0.11435	0.0572165
	118.2	4.52568	5.62378	3.72094	0.991843		4.28394	5.1953	3.45936	0.989389		3.41902	4.9415	2.72713	0.978611		3.546	4.62095	2.77862	0.98294		0.13188	0.664584	-0.06656	-0.0303722		0.22174	1.13795	0.02688	0.0129761		0.1789	1.44858	0.0554	0.0289976		0.307875	1.5742	0.1123	0.0561907
	118.5	4.5252	5.62318	3.72046	0.991715		4.28426	5.19569	3.45968	0.989481		3.42022	4.94324	2.72832	0.979042		3.54577	4.62065	2.7784	0.982861		0.13254	0.66791	-0.0659	-0.030071		0.21962	1.12707	0.02476	0.0119527		0.17825	1.44332	0.05475	0.0286574		0.3067	1.5682	0.111125	0.0556028
	118.8	4.52616	5.62438	3.72142	0.991971		4.28474	5.19627	3.46016	0.989618		3.42225	4.94616	2.73035	0.979768		3.547	4.62225	2.77962	0.983294		0.1322	0.666196	-0.06624	-0.0302261		0.21636	1.11034	0.0215	0.010379		0.1756	1.42186	0.0521	0.0272703		0.30525	1.56078	0.109675	0.0548773
	119.1	4.5257	5.6238	3.72096	0.991849		4.2857	5.19743	3.46112	0.989893		3.42347	4.94793	2.73157	0.980208		3.54763	4.62307	2.78025	0.983515		0.13058	0.658033	-0.06786	-0.0309654		0.21444	1.10048	0.01958	0.00945209		0.172975	1.40061	0.049475	0.0258964		0.30405	1.55465	0.108475	0.0542769
	119.4	4.52554	5.62361	3.7208	0.991806		4.28666	5.1986	3.46208	0.990167		3.4235	4.94797	2.7316	0.980217		3.54785	4.62336	2.78048	0.983595		0.1301	0.655614	-0.06834	-0.0311844		0.21408	1.09863	0.01922	0.0092783		0.169325	1.37105	0.045825	0.0239859		0.29975	1.53266	0.104175	0.0521253
	119.7	4.527	5.62542	3.72226	0.992195		4.28572	5.19746	3.46114	0.989898		3.4249	4.94999	2.733	0.980719		3.54802	4.62359	2.78065	0.983657		0.13042	0.657226	-0.06802	-0.0310384		0.21344	1.09535	0.01858	0.00896935		0.1683	1.36275	0.0448	0.0234494		0.2973	1.52013	0.101725	0.0508994
	120	4.52746	5.62599	3.72272	0.992318		4.28638	5.19826	3.4618	0.990087		3.42428	4.94909	2.73238	0.980495		3.54842	4.62411	2.78105	0.983798		0.12894	0.649768	-0.0695	-0.0317137		0.21212	1.08858	0.01726	0.00833213		0.16505	1.33644	0.04155	0.0217482		0.29365	1.50147	0.098075	0.0490731
	120.3	4.52812	5.62681	3.72338	0.992494		4.28652	5.19843	3.46194	0.990127		3.4249	4.94999	2.733	0.980719		3.54945	4.62544	2.78207	0.984161		0.12942	0.652187	-0.06902	-0.0314947		0.21	1.0777	0.01514	0.00730871		0.164	1.32794	0.0405	0.0211986		0.292425	1.49521	0.09685	0.0484601
	120.6	4.52714	5.62559	3.7224	0.992233		4.28718	5.19923	3.4626	0.990316		3.4251	4.95028	2.7332	0.980791		3.55127	4.62782	2.7839	0.984806		0.1286	0.648055	-0.06984	-0.0318689		0.20872	1.07113	0.01386	0.0066908		0.161975	1.31154	0.038475	0.0201387		0.29325	1.49942	0.097675	0.0488729
	120.9	4.52944	5.62845	3.7247	0.992846		4.28798	5.2002	3.4634	0.990545		3.4259	4.95144	2.734	0.981078		3.55147	4.62808	2.7841	0.984877		0.12746	0.64231	-0.07098	-0.0323891		0.2082	1.06846	0.01334	0.00643978		0.158525	1.2836	0.035025	0.0183329		0.293675	1.5016	0.0981	0.0490856
	121.2	4.5304	5.62964	3.72566	0.993101		4.28846	5.20078	3.46388	0.990682		3.42632	4.95205	2.73442	0.981231		3.55393	4.63128	2.78655	0.985744		0.12634	0.636666	-0.0721	-0.0329001		0.20822	1.06856	0.01336	0.00644943		0.1571	1.27206	0.0336	0.017587		0.291825	1.49214	0.09625	0.0481599
	121.5	4.52974	5.62882	3.725	0.992926		4.28914	5.20161	3.46456	0.990876		3.42713	4.95321	2.73522	0.981518		3.55313	4.63023	2.78575	0.985461		0.12244	0.617013	-0.076	-0.0346798		0.20822	1.06856	0.01336	0.00644943		0.155875	1.26215	0.032375	0.0169458		0.286325	1.46402	0.09075	0.0454079
	121.8	4.53022	5.62942	3.72548	0.993054		4.28996	5.2026	3.46538	0.991111		3.42733	4.9535	2.73543	0.98159		3.5525	4.62942	2.78512	0.98524		0.1203	0.606229	-0.07814	-0.0356563		0.2053	1.05358	0.01044	0.00503983		0.15405	1.24737	0.03055	0.0159906		0.28225	1.44318	0.086675	0.0433689
	122.1	4.53072	5.63004	3.72598	0.993187		4.29076	5.20357	3.46618	0.99134		3.42998	4.95733	2.73807	0.98254		3.55452	4.63206	2.78715	0.985956		0.11786	0.593933	-0.08058	-0.0367697		0.20154	1.03428	0.00668	0.00322472		0.1569	1.27045	0.0334	0.0174823		0.278	1.42145	0.082425	0.0412424
	122.4	4.5312	5.63064	3.72646	0.993315		4.29126	5.20418	3.46668	0.991483		3.4304	4.95794	2.7385	0.982693		3.55373	4.63101	2.78635	0.985673		0.1185	0.597158	-0.07994	-0.0364776		0.1996	1.02433	0.00474	0.0022882		0.1559	1.26235	0.0324	0.0169589		0.27535	1.4079	0.079775	0.0399164
	122.7	4.53056	5.62984	3.72582	0.993144		4.29108	5.20396	3.4665	0.991431		3.4304	4.95794	2.7385	0.982693		3.55475	4.63235	2.78737	0.986036		0.11738	0.591514	-0.08106	-0.0369887		0.19926	1.02258	0.0044	0.00212406		0.15385	1.24575	0.03035	0.0158859		0.274525	1.40368	0.07895	0.0395036
	123	4.53184	5.63143	3.7271	0.993485		4.29044	5.20318	3.46586	0.991248		3.4314	4.95939	2.7395	0.983052		3.557	4.63528	2.78963	0.986832		0.11706	0.589901	-0.08138	-0.0371347		0.19652	1.00852	0.00166	0.000801352		0.15385	1.24575	0.03035	0.0158859		0.273925	1.40061	0.07835	0.0392034
	123.3	4.53154	5.63106	3.7268	0.993405		4.29224	5.20537	3.46766	0.991763		3.43182	4.96	2.73992	0.983204		3.55675	4.63496	2.78938	0.986743		0.11394	0.574179	-0.0845	-0.0385584		0.19584	1.00503	0.00098	0.000473087		0.152825	1.23745	0.029325	0.0153494		0.272875	1.39524	0.0773	0.038678
	123.6	4.53332	5.63327	3.72858	0.99388		4.29226	5.20539	3.46768	0.991769		3.43222	4.96058	2.74032	0.983348		3.5566	4.63476	2.78923	0.98669		0.11544	0.581738	-0.083	-0.0378739		0.1949	1.00021	4e-05	1.93097e-05		0.15305	1.23927	0.02955	0.0154672		0.271275	1.38706	0.0757	0.0378775
	123.9	4.53282	5.63265	3.72808	0.993747		4.29304	5.20634	3.46846	0.991992		3.43345	4.96235	2.74155	0.983787		3.55757	4.63603	2.7902	0.987035		0.11202	0.564503	-0.08642	-0.0394345		0.19096	0.979986	-0.0039	-0.00188269		0.152	1.23077	0.0285	0.0149176		0.268625	1.37351	0.07305	0.0365515
	124.2	4.53366	5.6337	3.72892	0.99397		4.29322	5.20655	3.46864	0.992043		3.43305	4.96177	2.74115	0.983644		3.5574	4.6358	2.79002	0.986973		0.11282	0.568535	-0.08562	-0.0390695		0.18984	0.974238	-0.00502	-0.00242336		0.150175	1.21599	0.026675	0.0139623		0.266175	1.36099	0.0706	0.0353256
	124.5	4.53318	5.6331	3.72844	0.993843		4.29288	5.20614	3.4683	0.991946		3.43388	4.96296	2.74198	0.98394		3.559	4.63789	2.79162	0.987539		0.1089	0.54878	-0.08954	-0.0408582		0.18934	0.971672	-0.00552	-0.00266474		0.14735	1.19312	0.02385	0.0124836		0.26555	1.35779	0.069975	0.0350129
	124.8	4.534	5.63412	3.72926	0.994061		4.2937	5.20714	3.46912	0.992181		3.43447	4.96383	2.74257	0.984155		3.5582	4.63685	2.79082	0.987256		0.10794	0.543943	-0.0905	-0.0412963		0.18916	0.970748	-0.0057	-0.00275163		0.1461	1.183	0.0226	0.0118294		0.26435	1.35166	0.068775	0.0344124
	125.1	4.53334	5.6333	3.7286	0.993885		4.29384	5.20731	3.46926	0.992221		3.43427	4.96354	2.74238	0.984083		3.56042	4.63975	2.79305	0.988043		0.10584	0.53336	-0.0926	-0.0422545		0.18886	0.969209	-0.006	-0.00289645		0.142275	1.15202	0.018775	0.00982727		0.26375	1.34859	0.068175	0.0341122
	125.4	4.53432	5.63452	3.72958	0.994146		4.2945	5.20811	3.46992	0.992409		3.4353	4.96502	2.7434	0.984451		3.56105	4.64056	2.79367	0.988264		0.10842	0.546362	-0.09002	-0.0410773		0.1882	0.965822	-0.00666	-0.00321506		0.141625	1.14676	0.018125	0.00948705		0.2613	1.33606	0.065725	0.0328863
	125.7	4.5348	5.63511	3.73006	0.994274		4.29402	5.20752	3.46944	0.992272		3.43633	4.96651	2.74443	0.984819		3.55963	4.6387	2.79225	0.98776		0.1076	0.542229	-0.09084	-0.0414514		0.18722	0.960792	-0.00764	-0.00368815		0.14325	1.15992	0.01975	0.0103376		0.25705	1.31433	0.061475	0.0307598
	126	4.53564	5.63616	3.7309	0.994498		4.29514	5.20888	3.47056	0.992593		3.4367	4.96705	2.7448	0.984954		3.56105	4.64056	2.79367	0.988264		0.10532	0.53074	-0.09312	-0.0424918		0.18624	0.955763	-0.00862	-0.00416124		0.14165	1.14696	0.01815	0.00950013		0.255575	1.30679	0.06	0.0300218
	126.3	4.53542	5.63588	3.73068	0.99444		4.29564	5.20949	3.47106	0.992736		3.43752	4.96824	2.74562	0.98525		3.56205	4.64186	2.79467	0.988618		0.10728	0.540617	-0.09116	-0.0415975		0.18592	0.954121	-0.00894	-0.00431571		0.1392	1.12713	0.0157	0.00821774		0.255175	1.30474	0.0596	0.0298216
	126.6	4.53662	5.63737	3.73188	0.994759		4.29562	5.20946	3.47104	0.99273		3.43855	4.96972	2.74665	0.985618		3.56148	4.64111	2.7941	0.988415		0.10484	0.528321	-0.0936	-0.0427109		0.1848	0.948373	-0.01006	-0.00485638		0.13755	1.11377	0.01405	0.0073541		0.25395	1.29848	0.058375	0.0292087
	126.9	4.5374	5.63834	3.73266	0.994967		4.29612	5.21007	3.47154	0.992873		3.43752	4.96824	2.74562	0.98525		3.5625	4.64245	2.79513	0.988777		0.10304	0.51925	-0.0954	-0.0435322		0.18346	0.941496	-0.0114	-0.00550326		0.13555	1.09757	0.01205	0.00630725		0.253975	1.29861	0.0584	0.0292212
	127.2	4.53872	5.63998	3.73398	0.995319		4.29646	5.21048	3.47188	0.99297		3.43955	4.97117	2.74765	0.985976		3.56268	4.64268	2.7953	0.988839		0.1024	0.516025	-0.09604	-0.0438243		0.18102	0.928975	-0.01384	-0.00668115		0.134125	1.08603	0.010625	0.00556137		0.2554	1.30589	0.059825	0.0299342
	127.5	4.53838	5.63956	3.73364	0.995229		4.29726	5.21145	3.47268	0.993199		3.4404	4.97239	2.7485	0.986281		3.56288	4.64294	2.7955	0.98891		0.10012	0.504535	-0.09832	-0.0448647		0.1794	0.920661	-0.01546	-0.00746319		0.1337	1.08259	0.0102	0.00533892		0.2562	1.30998	0.060625	0.0303345
	127.8	4.53774	5.63877	3.733	0.995058		4.29694	5.21107	3.47236	0.993107		3.44035	4.97232	2.74845	0.986263		3.56473	4.64535	2.79735	0.989564		0.09604	0.483975	-0.1024	-0.0467264		0.17956	0.921482	-0.0153	-0.00738595		0.133075	1.07753	0.009575	0.00501178		0.2556	1.30692	0.060025	0.0300343
	128.1	4.5379	5.63896	3.73316	0.995101		4.29808	5.21245	3.4735	0.993433		3.44143	4.97388	2.74953	0.986649		3.56533	4.64613	2.79795	0.989777		0.09638	0.485688	-0.10206	-0.0465713		0.17926	0.919943	-0.0156	-0.00753077		0.133075	1.07753	0.009575	0.00501178		0.2542	1.29976	0.058625	0.0293338
	128.4	4.53872	5.63998	3.73398	0.995319		4.29762	5.21189	3.47304	0.993302		3.442	4.97471	2.7501	0.986856		3.56453	4.64509	2.79715	0.989494		0.09588	0.483169	-0.10256	-0.0467994		0.17844	0.915734	-0.01642	-0.00792662		0.13125	1.06275	0.00775	0.00405653		0.251525	1.28608	0.05595	0.0279953
	128.7	4.5384	5.63959	3.73366	0.995234		4.29776	5.21206	3.47318	0.993342		3.442	4.97471	2.7501	0.986856		3.56612	4.64717	2.79875	0.99006		0.09262	0.466741	-0.10582	-0.048287		0.17908	0.919019	-0.01578	-0.00761767		0.129825	1.05121	0.006325	0.00331065		0.251925	1.28812	0.05635	0.0281954
	129	4.53886	5.64016	3.73412	0.995357		4.2989	5.21344	3.47432	0.993668		3.442	4.97471	2.7501	0.986856		3.56553	4.64639	2.79815	0.989847		0.09148	0.460996	-0.10696	-0.0488072		0.18008	0.924151	-0.01478	-0.00713493		0.127175	1.02976	0.003675	0.00192358		0.248875	1.27253	0.0533	0.0266693
	129.3	4.53774	5.63877	3.733	0.995058		4.29842	5.21286	3.47384	0.993531		3.4426	4.97557	2.7507	0.987071		3.56513	4.64587	2.79775	0.989706		0.0915	0.461097	-0.10694	-0.0487981		0.17714	0.909063	-0.01772	-0.00855419		0.126175	1.02166	0.002675	0.00140016		0.245425	1.25489	0.04985	0.0249431
	129.6	4.53968	5.64118	3.73494	0.995575		4.29874	5.21325	3.47416	0.993622		3.44342	4.97677	2.75152	0.987367		3.56755	4.64903	2.80017	0.990564		0.09198	0.463515	-0.10646	-0.048579		0.17598	0.90311	-0.01888	-0.00911417		0.127775	1.03462	0.004275	0.00223763		0.246225	1.25898	0.05065	0.0253434
	129.9	4.54016	5.64177	3.73542	0.995703		4.29986	5.21461	3.47528	0.993942		3.44402	4.97763	2.75212	0.987582		3.56715	4.64851	2.79977	0.990422		0.09152	0.461197	-0.10692	-0.0487889		0.17568	0.90157	-0.01918	-0.00925899		0.1278	1.03482	0.0043	0.00225072		0.2462	1.25885	0.050625	0.0253309
	130.2	4.53954	5.641	3.7348	0.995538		4.2997	5.21441	3.47512	0.993897		3.44422	4.97792	2.75232	0.987654		3.5692	4.65118	2.80183	0.991147		0.0913	0.460089	-0.10714	-0.0488893		0.17664	0.906497	-0.01822	-0.00879556		0.1268	1.02672	0.0033	0.0017273		0.246425	1.26	0.05085	0.0254434
	130.5	4.54068	5.64242	3.73594	0.995842		4.30006	5.21485	3.47548	0.994		3.44525	4.9794	2.75335	0.988022		3.56858	4.65037	2.8012	0.990926		0.0902	0.454545	-0.10824	-0.0493913		0.1763	0.904752	-0.01856	-0.00895969		0.12435	1.00688	0.00085	0.00044491		0.2432	1.24351	0.047625	0.0238298
	130.8	4.54262	5.64483	3.73788	0.996359		4.30084	5.21579	3.47626	0.994223		3.44548	4.97973	2.75358	0.988103		3.56942	4.65147	2.80205	0.991227		0.09134	0.46029	-0.1071	-0.0488711		0.17712	0.90896	-0.01774	-0.00856384		0.1237	1.00162	0.0002	0.000104685		0.241375	1.23418	0.0458	0.0229166
	131.1	4.54066	5.64239	3.73592	0.995836		4.30086	5.21582	3.47628	0.994228		3.4463	4.98092	2.7544	0.988399		3.57023	4.65252	2.80285	0.99151		0.0884	0.445475	-0.11004	-0.0502126		0.17616	0.904034	-0.0187	-0.00902727		0.123125	0.996964	-0.000375	-0.000196284		0.24155	1.23508	0.045975	0.0230042
	131.4	4.541	5.64282	3.73626	0.995927		4.30086	5.21582	3.47628	0.994228		3.4463	4.98092	2.7544	0.988399		3.57002	4.65226	2.80265	0.991439		0.08954	0.45122	-0.1089	-0.0496924		0.17484	0.89726	-0.02002	-0.00966449		0.1229	0.995142	-0.0006	-0.000314054		0.24075	1.23099	0.045175	0.0226039
	131.7	4.54246	5.64463	3.73772	0.996316		4.302	5.2172	3.47742	0.994554		3.44565	4.97998	2.75375	0.988165		3.5696	4.6517	2.80222	0.991289		0.08872	0.447087	-0.10972	-0.0500666		0.17324	0.889049	-0.02162	-0.0104369		0.120275	0.973887	-0.003225	-0.00168804		0.2389	1.22153	0.043325	0.0216782
	132	4.54262	5.64483	3.73788	0.996359		4.30266	5.218	3.47808	0.994743		3.44707	4.98204	2.75517	0.988677		3.57043	4.65278	2.80305	0.991581		0.08972	0.452127	-0.10872	-0.0496103		0.17322	0.888946	-0.02164	-0.0104465		0.120875	0.978745	-0.002625	-0.00137399		0.2373	1.21335	0.041725	0.0208776
	132.3	4.54342	5.64582	3.73868	0.996572		4.30346	5.21897	3.47888	0.994972		3.44667	4.98146	2.75477	0.988533		3.57103	4.65356	2.80365	0.991793		0.08972	0.452127	-0.10872	-0.0496103		0.17112	0.878169	-0.02374	-0.0114603		0.11825	0.95749	-0.00525	-0.00274797		0.2381	1.21744	0.042525	0.0212779
	132.6	4.54262	5.64483	3.73788	0.996359		4.30298	5.21839	3.4784	0.994835		3.44753	4.98269	2.75563	0.988838		3.57063	4.65304	2.80325	0.991651		0.08906	0.448801	-0.10938	-0.0499115		0.1685	0.864723	-0.02636	-0.0127251		0.1168	0.945749	-0.0067	-0.00350694		0.23645	1.209	0.040875	0.0204523
	132.9	4.5457	5.64866	3.74096	0.99718		4.30282	5.2182	3.47824	0.994789		3.4485	4.9841	2.7566	0.989188		3.57262	4.65564	2.80525	0.992359		0.08954	0.45122	-0.1089	-0.0496924		0.16736	0.858873	-0.0275	-0.0132754		0.116825	0.945951	-0.006675	-0.00349385		0.23585	1.20593	0.040275	0.0201521
	133.2	4.54358	5.64602	3.73884	0.996615		4.30394	5.21955	3.47936	0.995109		3.4483	4.98381	2.7564	0.989116		3.57103	4.65356	2.80365	0.991793		0.08662	0.436505	-0.11182	-0.0510249		0.16736	0.858873	-0.0275	-0.0132754		0.1148	0.929555	-0.0087	-0.00455378		0.2324	1.18829	0.036825	0.0184259
	133.5	4.5431	5.64543	3.73836	0.996487		4.30426	5.21994	3.47968	0.995201		3.44932	4.98529	2.75743	0.989484		3.57203	4.65486	2.80465	0.992147		0.08548	0.43076	-0.11296	-0.0515451		0.16542	0.848917	-0.02944	-0.0142119		0.11355	0.919433	-0.00995	-0.00520806		0.231575	1.18407	0.036	0.0180131
	133.8	4.54084	5.64262	3.7361	0.995884		4.30392	5.21953	3.47934	0.995104		3.45015	4.98649	2.75825	0.98978		3.57325	4.65646	2.80587	0.99258		0.08272	0.416851	-0.11572	-0.0528045		0.16606	0.852202	-0.0288	-0.013903		0.11395	0.922672	-0.00955	-0.00499869		0.230375	1.17794	0.0348	0.0174126
	134.1	4.54358	5.64602	3.73884	0.996615		4.30394	5.21955	3.47936	0.995109		3.45075	4.98735	2.75885	0.989995		3.57245	4.65542	2.80507	0.992297		0.08532	0.429954	-0.11312	-0.0516181		0.16638	0.853844	-0.02848	-0.0137485		0.1107	0.896356	-0.0128	-0.00669982		0.226925	1.1603	0.03135	0.0156864
	134.4	4.54424	5.64684	3.7395	0.996791		4.3046	5.22035	3.48002	0.995298		3.45118	4.98797	2.75928	0.990148		3.57325	4.65646	2.80587	0.99258		0.08354	0.420984	-0.1149	-0.0524303		0.16622	0.853023	-0.02864	-0.0138257		0.1097	0.888259	-0.0138	-0.00722324		0.2273	1.16221	0.031725	0.015874
	134.7	4.54524	5.64809	3.7405	0.997057		4.30426	5.21994	3.47968	0.995201		3.44972	4.98587	2.75782	0.989628		3.57345	4.65672	2.80607	0.992651		0.08154	0.410905	-0.1169	-0.0533429		0.1644	0.843683	-0.03046	-0.0147043		0.1056	0.855061	-0.0179	-0.00936928		0.22365	1.14355	0.028075	0.0140477
	135	4.54556	5.64848	3.74082	0.997143		4.30478	5.22057	3.4802	0.99535		3.45135	4.98822	2.75945	0.990211		3.57385	4.65724	2.80647	0.992792		0.0806	0.406168	-0.11784	-0.0537719		0.16312	0.837114	-0.03174	-0.0153222		0.1056	0.855061	-0.0179	-0.00936928		0.22365	1.14355	0.028075	0.0140477
	135.3	4.54572	5.64868	3.74098	0.997185		4.30428	5.21997	3.4797	0.995207		3.45135	4.98822	2.75945	0.990211		3.57428	4.65779	2.8069	0.992943		0.07978	0.402036	-0.11866	-0.0541461		0.16052	0.823771	-0.03434	-0.0165774		0.10295	0.833603	-0.02055	-0.0107563		0.225475	1.15288	0.0299	0.0149608
	135.6	4.54636	5.64948	3.74162	0.997356		4.30494	5.22077	3.48036	0.995395		3.4536	4.99147	2.7617	0.991018		3.57468	4.65832	2.8073	0.993084		0.07962	0.40123	-0.11882	-0.0542191		0.15922	0.817099	-0.03564	-0.0172049		0.1052	0.851822	-0.0183	-0.00957864		0.22485	1.14969	0.029275	0.0146481
	135.9	4.54556	5.64848	3.74082	0.997143		4.30542	5.22135	3.48084	0.995533		3.45178	4.98884	2.75988	0.990363		3.57448	4.65806	2.8071	0.993013		0.07782	0.392159	-0.12062	-0.0550404		0.15742	0.807862	-0.03744	-0.0180739		0.104	0.842105	-0.0195	-0.0102068		0.224075	1.14572	0.0285	0.0142603
	136.2	4.54506	5.64786	3.74032	0.997009		4.3056	5.22157	3.48102	0.995584		3.4526	4.99003	2.7607	0.990659		3.57527	4.6591	2.8079	0.993296		0.07864	0.396291	-0.1198	-0.0546663		0.15582	0.799651	-0.03904	-0.0188462		0.106425	0.861741	-0.017075	-0.00893745		0.2261	1.15608	0.030525	0.0152736
	136.5	4.54586	5.64886	3.74112	0.997222		4.30686	5.2231	3.48228	0.995944		3.4532	4.99089	2.7613	0.990875		3.57468	4.65832	2.8073	0.993084		0.07814	0.393771	-0.1203	-0.0548944		0.15516	0.796264	-0.0397	-0.0191649		0.106	0.8583	-0.0175	-0.00915991		0.224275	1.14675	0.0287	0.0143604
	136.8	4.5454	5.64828	3.74066	0.9971		4.30672	5.22293	3.48214	0.995904		3.4534	4.99118	2.7615	0.990946		3.5757	4.65965	2.80832	0.993447		0.07666	0.386313	-0.12178	-0.0555698		0.15466	0.793698	-0.0402	-0.0194062		0.105	0.850202	-0.0185	-0.00968333		0.22505	1.15071	0.029475	0.0147482
	137.1	4.54474	5.64746	3.74	0.996924		4.30704	5.22331	3.48246	0.995996		3.45503	4.99353	2.76313	0.991529		3.5761	4.66017	2.80872	0.993588		0.07552	0.380568	-0.12292	-0.0560899		0.15352	0.787848	-0.04134	-0.0199566		0.105225	0.852024	-0.018275	-0.00956556		0.225275	1.15186	0.0297	0.0148608
	137.4	4.54686	5.6501	3.74212	0.997489		4.30704	5.22331	3.48246	0.995996		3.455	4.9935	2.7631	0.991521		3.5765	4.66069	2.80912	0.99373		0.078	0.393066	-0.12044	-0.0549583		0.15288	0.784563	-0.04198	-0.0202655		0.1044	0.845344	-0.0191	-0.00999738		0.223675	1.14368	0.0281	0.0140602
	137.7	4.54654	5.6497	3.7418	0.997404		4.30704	5.22331	3.48246	0.995996		3.4548	4.99321	2.7629	0.991449		3.57753	4.66203	2.81015	0.994092		0.07684	0.38722	-0.1216	-0.0554876		0.15284	0.784358	-0.04202	-0.0202848		0.1042	0.843725	-0.0193	-0.0101021		0.22305	1.14048	0.027475	0.0137475
	138	4.54718	5.6505	3.74244	0.997574		4.30784	5.22428	3.48326	0.996225		3.45605	4.99501	2.76415	0.991897		3.57755	4.66206	2.81018	0.994101		0.07978	0.402036	-0.11866	-0.0541461		0.154	0.790311	-0.04086	-0.0197248		0.1044	0.845344	-0.0191	-0.00999738		0.224075	1.14572	0.0285	0.0142603
	138.3	4.54702	5.6503	3.74228	0.997532		4.30738	5.22373	3.4828	0.996093		3.45602	4.99498	2.76412	0.991888		3.57775	4.66232	2.81038	0.994172		0.07912	0.39871	-0.11932	-0.0544472		0.15256	0.782921	-0.0423	-0.02042		0.101925	0.825304	-0.021575	-0.0112929		0.222025	1.13524	0.02645	0.0132346
	138.6	4.54996	5.65395	3.74522	0.998315		4.30818	5.2247	3.4836	0.996322		3.45642	4.99556	2.76452	0.992032		3.57793	4.66255	2.81055	0.994234		0.0822	0.414231	-0.11624	-0.0530418		0.15286	0.784461	-0.042	-0.0202752		0.10195	0.825506	-0.02155	-0.0112798		0.218975	1.11965	0.0234	0.0117085
	138.9	4.54978	5.65373	3.74504	0.998267		4.30818	5.2247	3.4836	0.996322		3.45463	4.99295	2.76273	0.991386		3.57832	4.66307	2.81095	0.994375		0.0817	0.411711	-0.11674	-0.0532699		0.15206	0.780355	-0.0428	-0.0206614		0.0995	0.805668	-0.024	-0.0125622		0.21815	1.11543	0.022575	0.0112957
	139.2	4.5475	5.65089	3.74276	0.99766		4.30898	5.22567	3.4844	0.996551		3.45628	4.99534	2.76437	0.991978		3.57815	4.66284	2.81078	0.994313		0.07682	0.38712	-0.12162	-0.0554967		0.1501	0.770297	-0.04476	-0.0216075		0.10115	0.819028	-0.02235	-0.0116985		0.21735	1.11134	0.021775	0.0108954
	139.5	4.54734	5.65069	3.7426	0.997617		4.3085	5.22508	3.48392	0.996414		3.45728	4.99678	2.76538	0.992337		3.57877	4.66366	2.8114	0.994535		0.07636	0.384801	-0.12208	-0.0557066		0.1496	0.767731	-0.04526	-0.0218489		0.1001	0.810526	-0.0234	-0.0122481		0.21855	1.11747	0.022975	0.0114958
	139.8	4.54784	5.65132	3.7431	0.99775		4.30914	5.22586	3.48456	0.996597		3.45748	4.99707	2.76558	0.992409		3.57897	4.66392	2.8116	0.994605		0.07586	0.382282	-0.12258	-0.0559348		0.14864	0.762804	-0.04622	-0.0223123		0.100125	0.810729	-0.023375	-0.012235		0.21995	1.12463	0.024375	0.0121963
	140.1	4.54848	5.65211	3.74374	0.997921		4.30946	5.22625	3.48488	0.996688		3.45788	4.99765	2.76598	0.992552		3.57815	4.66284	2.81078	0.994313		0.0757	0.381476	-0.12274	-0.0560078		0.14798	0.759417	-0.04688	-0.0226309		0.098525	0.797773	-0.024975	-0.0130725		0.218125	1.1153	0.02255	0.0112832
	140.4	4.54766	5.65109	3.74292	0.997702		4.30946	5.22625	3.48488	0.996688		3.4595	5	2.7676	0.993135		3.57998	4.66522	2.8126	0.994959		0.07668	0.386414	-0.12176	-0.0555606		0.1506	0.772863	-0.04426	-0.0213662		0.098525	0.797773	-0.024975	-0.0130725		0.217325	1.11121	0.02175	0.0108829
	140.7	4.54894	5.65268	3.7442	0.998043		4.31044	5.22744	3.48586	0.996968		3.45808	4.99794	2.76618	0.992624		3.57958	4.6647	2.8122	0.994818		0.07784	0.39226	-0.1206	-0.0550313		0.15206	0.780355	-0.0428	-0.0206614		0.0995	0.805668	-0.024	-0.0125622		0.216325	1.1061	0.02075	0.0103825
	141	4.54864	5.65231	3.7439	0.997964		4.31044	5.22744	3.48586	0.996968		3.4595	5	2.7676	0.993135		3.58058	4.666	2.8132	0.995171		0.07604	0.383189	-0.1224	-0.0558527		0.154	0.790311	-0.04086	-0.0197248		0.0995	0.805668	-0.024	-0.0125622		0.214275	1.09562	0.0187	0.00935678
	141.3	4.54898	5.65273	3.74424	0.998054		4.30996	5.22685	3.48538	0.996831		3.45953	5.00004	2.76762	0.993144		3.57978	4.66496	2.8124	0.994888		0.07652	0.385608	-0.12192	-0.0556336		0.1553	0.796982	-0.03956	-0.0190973		0.097675	0.790891	-0.025825	-0.0135174		0.210625	1.07695	0.01505	0.00753046
	141.6	4.55012	5.65415	3.74538	0.998358		4.31062	5.22766	3.48604	0.99702		3.45993	5.00061	2.76803	0.993288		3.57975	4.66493	2.81237	0.994879		0.07476	0.376739	-0.12368	-0.0564367		0.15384	0.78949	-0.04102	-0.0198021		0.096675	0.782794	-0.026825	-0.0140408		0.2098	1.07273	0.014225	0.00711766
	141.9	4.54928	5.65311	3.74454	0.998134		4.31046	5.22746	3.48588	0.996974		3.45927	4.99967	2.76737	0.993055		3.57998	4.66522	2.8126	0.994959		0.0752	0.378956	-0.12324	-0.056236		0.15302	0.785282	-0.04184	-0.0201979		0.092775	0.751215	-0.030725	-0.0160822		0.209625	1.07184	0.01405	0.0070301
	142.2	4.5488	5.65251	3.74406	0.998006		4.31044	5.22744	3.48586	0.996968		3.46073	5.00177	2.76883	0.993575		3.581	4.66656	2.81363	0.995322		0.0744	0.374924	-0.12404	-0.056601		0.14996	0.769578	-0.0449	-0.0216751		0.09055	0.733198	-0.03295	-0.0172468		0.210625	1.07695	0.01505	0.00753046
	142.5	4.55028	5.65435	3.74554	0.998401		4.31126	5.22843	3.48668	0.997203		3.45993	5.00061	2.76803	0.993288		3.58223	4.66815	2.81485	0.995755		0.07276	0.36666	-0.12568	-0.0573494		0.14688	0.753772	-0.04798	-0.023162		0.0877	0.710121	-0.0358	-0.0187386		0.2088	1.06762	0.013225	0.0066173
	142.8	4.54978	5.65373	3.74504	0.998267		4.31112	5.22826	3.48654	0.997163		3.46113	5.00235	2.76923	0.993718		3.5816	4.66734	2.81422	0.995534		0.07228	0.364241	-0.12616	-0.0575684		0.14442	0.741147	-0.05044	-0.0243495		0.08995	0.72834	-0.03355	-0.0175608		0.205925	1.05292	0.01035	0.00517875
	143.1	4.55074	5.65492	3.746	0.998523		4.31142	5.22863	3.48684	0.997249		3.46113	5.00235	2.76923	0.993718		3.5816	4.66734	2.81422	0.995534		0.07262	0.365954	-0.12582	-0.0574133		0.14424	0.740224	-0.05062	-0.0244364		0.092575	0.749595	-0.030925	-0.0161869		0.20675	1.05714	0.011175	0.00559155
	143.4	4.5496	5.6535	3.74486	0.998219		4.3111	5.22824	3.48652	0.997157		3.46033	5.00119	2.76843	0.993431		3.5814	4.66708	2.81402	0.995463		0.07294	0.367567	-0.1255	-0.0572672		0.14522	0.745253	-0.04964	-0.0239633		0.0922	0.746559	-0.0313	-0.0163831		0.20615	1.05407	0.010575	0.00529134
	143.7	4.55014	5.65417	3.7454	0.998363		4.31094	5.22804	3.48636	0.997111		3.45967	5.00025	2.76777	0.993198		3.58345	4.66975	2.81608	0.996188		0.07162	0.360915	-0.12682	-0.0578696		0.1462	0.750282	-0.04866	-0.0234902		0.091575	0.741498	-0.031925	-0.0167103		0.20615	1.05407	0.010575	0.00529134
	144	4.55192	5.65639	3.74718	0.998838		4.31238	5.22979	3.4878	0.997523		3.46155	5.00296	2.76965	0.993871		3.58263	4.66868	2.81525	0.995896		0.06822	0.343781	-0.13022	-0.059421		0.14586	0.748537	-0.049	-0.0236544		0.09055	0.733198	-0.03295	-0.0172468		0.205725	1.0519	0.01015	0.00507868
	144.3	4.55076	5.65494	3.74602	0.998529		4.31174	5.22901	3.48716	0.99734		3.46155	5.00296	2.76965	0.993871		3.58263	4.66868	2.81525	0.995896		0.06642	0.334711	-0.13202	-0.0602424		0.14554	0.746895	-0.04932	-0.0238088		0.088925	0.72004	-0.034575	-0.0180974		0.2039	1.04257	0.008325	0.00416552
	144.6	4.55206	5.65656	3.74732	0.998875		4.31174	5.22901	3.48716	0.99734		3.46335	5.00556	2.77145	0.994517		3.58425	4.67079	2.81688	0.996471		0.06904	0.347914	-0.1294	-0.0590469		0.14554	0.746895	-0.04932	-0.0238088		0.09095	0.736437	-0.03255	-0.0170374		0.202475	1.03528	0.0069	0.0034525
	144.9	4.55156	5.65594	3.74682	0.998742		4.31176	5.22904	3.48718	0.997346		3.46255	5.00441	2.77065	0.99423		3.58263	4.66868	2.81525	0.995896		0.06724	0.338843	-0.1312	-0.0598682		0.1444	0.741045	-0.05046	-0.0243592		0.0887	0.718219	-0.0348	-0.0182151		0.20125	1.02902	0.005675	0.00283956
	145.2	4.5519	5.65636	3.74716	0.998832		4.3129	5.23042	3.48832	0.997672		3.46255	5.00441	2.77065	0.99423		3.58303	4.6692	2.81565	0.996038		0.06872	0.346301	-0.12972	-0.0591929		0.1444	0.741045	-0.05046	-0.0243592		0.088325	0.715182	-0.035175	-0.0184114		0.202725	1.03656	0.00715	0.00357759
	145.5	4.55156	5.65594	3.74682	0.998742		4.31258	5.23003	3.488	0.99758		3.46275	5.0047	2.77085	0.994302		3.58345	4.66975	2.81608	0.996188		0.06852	0.345293	-0.12992	-0.0592841		0.1452	0.74515	-0.04966	-0.023973		0.0893	0.723077	-0.0342	-0.0179011		0.203925	1.04269	0.00835	0.00417803
	145.8	4.55126	5.65557	3.74652	0.998662		4.31258	5.23003	3.488	0.99758		3.46375	5.00614	2.77185	0.99466		3.58303	4.6692	2.81565	0.996038		0.06936	0.349526	-0.12908	-0.0589008		0.14408	0.739403	-0.05078	-0.0245136		0.0869	0.703644	-0.0366	-0.0191573		0.20165	1.03106	0.006075	0.0030397
	146.1	4.55158	5.65596	3.74684	0.998747		4.31256	5.23001	3.48798	0.997575		3.46338	5.0056	2.77148	0.994526		3.58425	4.67079	2.81688	0.996471		0.0713	0.359303	-0.12714	-0.0580156		0.14114	0.724315	-0.05372	-0.0259329		0.084225	0.681984	-0.039275	-0.0205574		0.20025	1.0239	0.004675	0.0023392
	146.4	4.55236	5.65693	3.74762	0.998955		4.31324	5.23083	3.48866	0.997769		3.4654	5.00853	2.7735	0.995253		3.58507	4.67187	2.8177	0.996763		0.06998	0.352651	-0.12846	-0.0586179		0.14198	0.728626	-0.05288	-0.0255274		0.085275	0.690486	-0.038225	-0.0200079		0.199225	1.01866	0.00365	0.00182632
	146.7	4.55156	5.65594	3.74682	0.998742		4.31388	5.23161	3.4893	0.997952		3.46477	5.00762	2.77287	0.995028		3.58465	4.67131	2.81727	0.996613		0.07082	0.356884	-0.12762	-0.0582346		0.14424	0.740224	-0.05062	-0.0244364		0.082825	0.670648	-0.040675	-0.0212902		0.19555	0.999872	-2.5e-05	-1.25091e-05
	147	4.55156	5.65594	3.74682	0.998742		4.31404	5.2318	3.48946	0.997998		3.46477	5.00762	2.77287	0.995028		3.58565	4.67262	2.81827	0.996967		0.07116	0.358597	-0.12728	-0.0580795		0.14214	0.729447	-0.05272	-0.0254502		0.0808	0.654251	-0.0427	-0.0223502		0.19415	0.992714	-0.001425	-0.000713017
	147.3	4.55288	5.65758	3.74814	0.999094		4.31404	5.2318	3.48946	0.997998		3.46437	5.00705	2.77248	0.994885		3.58588	4.67291	2.8185	0.997046		0.07132	0.359403	-0.12712	-0.0580065		0.14066	0.721852	-0.0542	-0.0261646		0.07955	0.64413	-0.04395	-0.0230044		0.19435	0.993736	-0.001225	-0.000612944
	147.6	4.55158	5.65596	3.74684	0.998747		4.31388	5.23161	3.4893	0.997952		3.46335	5.00556	2.77145	0.994517		3.58525	4.6721	2.81787	0.996825		0.07114	0.358496	-0.1273	-0.0580886		0.14098	0.723494	-0.05388	-0.0260101		0.079775	0.645951	-0.043725	-0.0228867		0.19415	0.992714	-0.001425	-0.000713017
	147.9	4.55142	5.65576	3.74668	0.998705		4.31404	5.2318	3.48946	0.997998		3.4656	5.00882	2.7737	0.995324		3.58548	4.67239	2.8181	0.996905		0.07	0.352751	-0.12844	-0.0586088		0.14084	0.722775	-0.05402	-0.0260777		0.082	0.663968	-0.0415	-0.0217221		0.193125	0.987473	-0.00245	-0.00122589
	148.2	4.5527	5.65736	3.74796	0.999046		4.31404	5.2318	3.48946	0.997998		3.46537	5.00849	2.77347	0.995244		3.58568	4.67265	2.8183	0.996975		0.07066	0.356077	-0.12778	-0.0583076		0.13902	0.713435	-0.05584	-0.0269563		0.08325	0.674089	-0.04025	-0.0210678		0.192325	0.983382	-0.00325	-0.00162618
	148.5	4.5514	5.65574	3.74666	0.998699		4.31436	5.23219	3.48978	0.998089		3.4662	5.00968	2.7743	0.99554		3.5867	4.67399	2.81933	0.997338		0.06968	0.351139	-0.12876	-0.0587548		0.13872	0.711896	-0.05614	-0.0271011		0.082225	0.665789	-0.041275	-0.0216043		0.1915	0.979164	-0.004075	-0.00203898
	148.8	4.55222	5.65676	3.74748	0.998918		4.31436	5.23219	3.48978	0.998089		3.46705	5.01091	2.77515	0.995845		3.5863	4.67346	2.81893	0.997197		0.07016	0.353558	-0.12828	-0.0585358		0.13888	0.712717	-0.05598	-0.0270239		0.083	0.672065	-0.0405	-0.0211986		0.189875	0.970855	-0.0057	-0.00285207
	149.1	4.55318	5.65795	3.74844	0.999174		4.3155	5.23357	3.49092	0.998416		3.46663	5.0103	2.77473	0.995692		3.58568	4.67265	2.8183	0.996975		0.07032	0.354364	-0.12812	-0.0584628		0.1379	0.707688	-0.05696	-0.027497		0.082425	0.667409	-0.041075	-0.0214996		0.18885	0.965614	-0.006725	-0.00336494
	149.4	4.55418	5.65919	3.74944	0.99944		4.315	5.23297	3.49042	0.998273		3.46663	5.0103	2.77473	0.995692		3.58588	4.67291	2.8185	0.997046		0.07002	0.352852	-0.12842	-0.0585997		0.13856	0.711075	-0.0563	-0.0271784		0.082225	0.665789	-0.041275	-0.0216043		0.18825	0.962546	-0.007325	-0.00366516
	149.7	4.55172	5.65614	3.74698	0.998784		4.3147	5.2326	3.49012	0.998187		3.4658	5.00911	2.7739	0.995396		3.58688	4.67421	2.8195	0.9974		0.06476	0.326345	-0.13368	-0.0609999		0.13688	0.702453	-0.05798	-0.0279894		0.079775	0.645951	-0.043725	-0.0228867		0.187625	0.959351	-0.00795	-0.00397788
	150	4.55222	5.65676	3.74748	0.998918		4.315	5.23297	3.49042	0.998273		3.46683	5.01059	2.77493	0.995764		3.58568	4.67265	2.8183	0.996975		0.0643	0.324027	-0.13414	-0.0612098		0.13674	0.701735	-0.05812	-0.028057		0.081	0.65587	-0.0425	-0.0222455		0.1862	0.952064	-0.009375	-0.0046909
	150.3	4.55092	5.65514	3.74618	0.998571		4.3142	5.232	3.48962	0.998044		3.46762	5.01174	2.77572	0.996051		3.58727	4.67474	2.8199	0.997541		0.06446	0.324834	-0.13398	-0.0611368		0.13674	0.701735	-0.05812	-0.028057		0.0814	0.659109	-0.0421	-0.0220361		0.18845	0.963569	-0.007125	-0.00356508
	150.6	4.55336	5.65818	3.74862	0.999222		4.31502	5.23299	3.49044	0.998278		3.46865	5.01322	2.77675	0.996419		3.5871	4.67451	2.81973	0.99748		0.06596	0.332393	-0.13248	-0.0604523		0.1366	0.701016	-0.05826	-0.0281245		0.080975	0.655668	-0.042525	-0.0222586		0.189475	0.96881	-0.0061	-0.00305221
	150.9	4.5527	5.65736	3.74796	0.999046		4.31518	5.23319	3.4906	0.998324		3.46822	5.01261	2.77632	0.996266		3.5865	4.67373	2.81913	0.997267		0.06544	0.329772	-0.133	-0.0606896		0.13708	0.703479	-0.05778	-0.0278928		0.080575	0.652429	-0.042925	-0.0224679		0.186825	0.95526	-0.00875	-0.00437817
	151.2	4.55254	5.65716	3.7478	0.999003		4.3147	5.2326	3.49012	0.998187		3.46885	5.01351	2.77695	0.996491		3.58792	4.67558	2.82055	0.997771		0.06496	0.327353	-0.13348	-0.0609086		0.13626	0.699271	-0.0586	-0.0282887		0.079175	0.641093	-0.044325	-0.0232007		0.188425	0.963441	-0.00715	-0.00357759
	151.5	4.55318	5.65795	3.74844	0.999174		4.31582	5.23396	3.49124	0.998507		3.46765	5.01178	2.77575	0.99606		3.58853	4.67636	2.82115	0.997984		0.06512	0.32816	-0.13332	-0.0608356		0.13626	0.699271	-0.0586	-0.0282887		0.074675	0.604656	-0.048825	-0.0255561		0.187625	0.959351	-0.00795	-0.00397788
	151.8	4.55384	5.65877	3.7491	0.99935		4.31616	5.23437	3.49158	0.998604		3.46745	5.01149	2.77555	0.995988		3.5869	4.67425	2.81953	0.997409		0.06314	0.318182	-0.1353	-0.0617391		0.1343	0.689213	-0.06056	-0.0292349		0.075875	0.614372	-0.047625	-0.024928		0.18825	0.962546	-0.007325	-0.00366516
	152.1	4.55238	5.65696	3.74764	0.99896		4.31648	5.23476	3.4919	0.998696		3.46868	5.01326	2.77678	0.996428		3.58853	4.67636	2.82115	0.997984		0.06188	0.311832	-0.13656	-0.0623141		0.13496	0.6926	-0.0599	-0.0289162		0.07815	0.632794	-0.04535	-0.0237372		0.1909	0.976096	-0.004675	-0.0023392
	152.4	4.5527	5.65736	3.74796	0.999046		4.31582	5.23396	3.49124	0.998507		3.46825	5.01265	2.77635	0.996275		3.58752	4.67506	2.82015	0.99763		0.06316	0.318283	-0.13528	-0.06173		0.13318	0.683465	-0.06168	-0.0297755		0.076125	0.616397	-0.047375	-0.0247972		0.190075	0.971878	-0.0055	-0.002752
	152.7	4.55174	5.65616	3.747	0.99879		4.31534	5.23338	3.49076	0.99837		3.46925	5.01409	2.77735	0.996634		3.58893	4.67689	2.82155	0.998125		0.06366	0.320802	-0.13478	-0.0615018		0.13384	0.686852	-0.06102	-0.0294569		0.0755	0.611336	-0.048	-0.0251243		0.192325	0.983382	-0.00325	-0.00162618
	153	4.55352	5.65837	3.74878	0.999264		4.31614	5.23435	3.49156	0.998599		3.46928	5.01413	2.77738	0.996643		3.58873	4.67662	2.82135	0.998054		0.0661	0.333098	-0.13234	-0.0603884		0.13334	0.684286	-0.06152	-0.0296983		0.0747	0.604858	-0.0488	-0.0255431		0.191675	0.980059	-0.0039	-0.00195141
	153.3	4.554	5.65897	3.74926	0.999392		4.31662	5.23493	3.49204	0.998736		3.46868	5.01326	2.77678	0.996428		3.5881	4.67581	2.82072	0.997833		0.06676	0.336424	-0.13168	-0.0600872		0.13398	0.687571	-0.06088	-0.0293893		0.07245	0.58664	-0.05105	-0.0267208		0.189475	0.96881	-0.0061	-0.00305221
	153.6	4.5532	5.65798	3.74846	0.999179		4.31648	5.23476	3.4919	0.998696		3.46828	5.01268	2.77637	0.996284		3.58955	4.6777	2.82218	0.998346		0.06384	0.321709	-0.1346	-0.0614197		0.1332	0.683568	-0.06166	-0.0297659		0.068575	0.555263	-0.054925	-0.028749		0.187825	0.960373	-0.00775	-0.00387781
	153.9	4.55288	5.65758	3.74814	0.999094		4.31614	5.23435	3.49156	0.998599		3.4693	5.01416	2.7774	0.996652		3.58893	4.67689	2.82155	0.998125		0.0638	0.321508	-0.13464	-0.0614379		0.1322	0.678436	-0.06266	-0.0302486		0.0692	0.560324	-0.0543	-0.0284219		0.188425	0.963441	-0.00715	-0.00357759
	154.2	4.55334	5.65815	3.7486	0.999216		4.3168	5.23515	3.49222	0.998787		3.4697	5.01474	2.7778	0.996796		3.58853	4.67636	2.82115	0.997984		0.063	0.317476	-0.13544	-0.061803		0.1304	0.669198	-0.06446	-0.0311175		0.067775	0.548785	-0.055725	-0.0291678		0.187025	0.956283	-0.00855	-0.0042781
	154.5	4.5545	5.65959	3.74976	0.999526		4.31696	5.23534	3.49238	0.998833		3.4701	5.01532	2.7782	0.996939		3.58893	4.67689	2.82155	0.998125		0.06268	0.315864	-0.13576	-0.061949		0.13008	0.667556	-0.06478	-0.031272		0.0696	0.563563	-0.0539	-0.0282125		0.18395	0.94056	-0.011625	-0.00581672
	154.8	4.55402	5.659	3.74928	0.999398		4.31682	5.23517	3.49224	0.998793		3.47008	5.01528	2.77818	0.99693		3.58935	4.67744	2.82198	0.998275		0.06218	0.313344	-0.13626	-0.0621772		0.13088	0.671662	-0.06398	-0.0308858		0.070025	0.567004	-0.053475	-0.0279901		0.182925	0.935319	-0.01265	-0.00632959
	155.1	4.55304	5.65778	3.7483	0.999136		4.3163	5.23454	3.49172	0.998644		3.46905	5.0138	2.77715	0.996562		3.5873	4.67477	2.81993	0.99755		0.06202	0.312538	-0.13642	-0.0622502		0.13268	0.680899	-0.06218	-0.0300169		0.07125	0.576923	-0.05225	-0.0273489		0.1807	0.923942	-0.014875	-0.0074429
	155.4	4.5532	5.65798	3.74846	0.999179		4.31662	5.23493	3.49204	0.998736		3.47313	5.01969	2.78123	0.998025		3.58895	4.67692	2.82158	0.998134		0.06546	0.329873	-0.13298	-0.0606805		0.13202	0.677512	-0.06284	-0.0303355		0.0741	0.6	-0.0494	-0.0258571		0.181125	0.926115	-0.01445	-0.00723024
	155.7	4.55468	5.65982	3.74994	0.999574		4.31696	5.23534	3.49238	0.998833		3.46948	5.01442	2.77758	0.996715		3.5879	4.67555	2.82052	0.997763		0.06544	0.329772	-0.133	-0.0606896		0.13284	0.68172	-0.06202	-0.0299397		0.0704	0.57004	-0.0531	-0.0277938		0.1795	0.917806	-0.016075	-0.00804333
	156	4.5532	5.65798	3.74846	0.999179		4.31632	5.23457	3.49174	0.99865		3.46988	5.01499	2.77798	0.996858		3.5879	4.67555	2.82052	0.997763		0.06398	0.322415	-0.13446	-0.0613558		0.13218	0.678333	-0.06268	-0.0302583		0.069175	0.560121	-0.054325	-0.028435		0.179075	0.915633	-0.0165	-0.00825599
	156.3	4.55484	5.66001	3.7501	0.999616		4.31728	5.23573	3.4927	0.998925		3.46948	5.01442	2.77758	0.996715		3.58973	4.67793	2.82235	0.998408		0.06674	0.336323	-0.1317	-0.0600964		0.13286	0.681823	-0.062	-0.02993		0.06835	0.553441	-0.05515	-0.0288668		0.178675	0.913588	-0.0169	-0.00845613
	156.6	4.55418	5.65919	3.74944	0.99944		4.31744	5.23593	3.49286	0.99897		3.46928	5.01413	2.77738	0.996643		3.58875	4.67666	2.82138	0.998063		0.06644	0.334812	-0.132	-0.0602333		0.1327	0.681002	-0.06216	-0.0300072		0.069175	0.560121	-0.054325	-0.028435		0.17605	0.900166	-0.019525	-0.00976958
	156.9	4.55286	5.65755	3.74812	0.999088		4.3173	5.23576	3.49272	0.99893		3.46968	5.01471	2.77778	0.996787		3.58995	4.67822	2.82258	0.998488		0.06724	0.338843	-0.1312	-0.0598682		0.1288	0.660987	-0.06606	-0.0318899		0.0702	0.568421	-0.0533	-0.0278985		0.17585	0.899144	-0.019725	-0.00986966
	157.2	4.55402	5.659	3.74928	0.999398		4.31746	5.23595	3.49288	0.998976		3.46988	5.01499	2.77798	0.996858		3.59013	4.67845	2.82275	0.99855		0.06724	0.338843	-0.1312	-0.0598682		0.12696	0.651545	-0.0679	-0.0327782		0.066975	0.542308	-0.056525	-0.0295865		0.174625	0.89288	-0.02095	-0.0104826
	157.5	4.55354	5.6584	3.7488	0.99927		4.31698	5.23537	3.4924	0.998839		3.47008	5.01528	2.77818	0.99693		3.58955	4.6777	2.82218	0.998346		0.06708	0.338037	-0.13136	-0.0599412		0.12782	0.655958	-0.06704	-0.032363		0.06675	0.540486	-0.05675	-0.0297043		0.173775	0.888534	-0.0218	-0.0109079
	157.8	4.55368	5.65857	3.74894	0.999307		4.3178	5.23636	3.49322	0.999073		3.46988	5.01499	2.77798	0.996858		3.58975	4.67796	2.82238	0.998417		0.06722	0.338742	-0.13122	-0.0598773		0.12826	0.658216	-0.0666	-0.0321506		0.067375	0.545547	-0.056125	-0.0293771		0.173575	0.887511	-0.022	-0.011008
	158.1	4.55304	5.65778	3.7483	0.999136		4.31828	5.23694	3.4937	0.999211		3.47133	5.01709	2.77942	0.997379		3.58995	4.67822	2.82258	0.998488		0.06658	0.335517	-0.13186	-0.0601694		0.13042	0.669301	-0.06444	-0.0311079		0.067775	0.548785	-0.055725	-0.0291678		0.17685	0.904257	-0.018725	-0.00936929
	158.4	4.55564	5.66101	3.7509	0.999829		4.3181	5.23673	3.49352	0.999159		3.4711	5.01677	2.7792	0.997298		3.58895	4.67692	2.82158	0.998134		0.06758	0.340556	-0.13086	-0.0597131		0.1312	0.673304	-0.06366	-0.0307314		0.069175	0.560121	-0.054325	-0.028435		0.1791	0.915761	-0.016475	-0.00824348
	158.7	4.55372	5.65862	3.74898	0.999318		4.31778	5.23634	3.4932	0.999068		3.4713	5.01705	2.7794	0.99737		3.58955	4.6777	2.82218	0.998346		0.06398	0.322415	-0.13446	-0.0613558		0.12828	0.658319	-0.06658	-0.032141		0.070425	0.570243	-0.053075	-0.0277807		0.180325	0.922025	-0.01525	-0.00763053
	159	4.55402	5.659	3.74928	0.999398		4.31794	5.23653	3.49336	0.999113		3.4723	5.0185	2.7804	0.997729		3.58975	4.67796	2.82238	0.998417		0.06446	0.324834	-0.13398	-0.0611368		0.12812	0.657498	-0.06674	-0.0322182		0.0688	0.557085	-0.0547	-0.0286312		0.1809	0.924965	-0.014675	-0.00734282
	159.3	4.55404	5.65902	3.7493	0.999403		4.31844	5.23714	3.49386	0.999256		3.4717	5.01763	2.7798	0.997513		3.58973	4.67793	2.82235	0.998408		0.06448	0.324934	-0.13396	-0.0611276		0.12734	0.653495	-0.06752	-0.0325947		0.066575	0.539069	-0.056925	-0.0297959		0.181125	0.926115	-0.01445	-0.00723024
	159.6	4.55288	5.65758	3.74814	0.999094		4.31812	5.23675	3.49354	0.999165		3.4715	5.01734	2.7796	0.997441		3.5916	4.68037	2.82423	0.999071		0.0617	0.310925	-0.13674	-0.0623962		0.12586	0.6459	-0.069	-0.0333092		0.0637	0.515789	-0.0598	-0.0313007		0.1823	0.932123	-0.013275	-0.00664232
	159.9	4.55386	5.6588	3.74912	0.999355		4.3186	5.23733	3.49402	0.999302		3.4711	5.01677	2.7792	0.997298		3.58913	4.67715	2.82175	0.998196		0.0617	0.310925	-0.13674	-0.0623962		0.1252	0.642513	-0.06966	-0.0336278		0.064725	0.524089	-0.058775	-0.0307642		0.1801	0.920874	-0.015475	-0.00774311
	160.2	4.55434	5.65939	3.7496	0.999483		4.31874	5.2375	3.49416	0.999342		3.4717	5.01763	2.7798	0.997513		3.59035	4.67874	2.82298	0.998629		0.06186	0.311732	-0.13658	-0.0623232		0.12716	0.652571	-0.0677	-0.0326816		0.0627	0.507692	-0.0608	-0.0318241		0.183575	0.938642	-0.012	-0.00600435
	160.5	4.55484	5.66001	3.7501	0.999616		4.31892	5.23772	3.49434	0.999394		3.4719	5.01792	2.78	0.997585		3.5912	4.67985	2.82382	0.99893		0.06334	0.31919	-0.1351	-0.0616478		0.12762	0.654932	-0.06724	-0.0324596		0.060425	0.489271	-0.063075	-0.0330149		0.184175	0.94171	-0.0114	-0.00570414
	160.8	4.55466	5.65979	3.74992	0.999568		4.3186	5.23733	3.49402	0.999302		3.47213	5.01825	2.78023	0.997666		3.59035	4.67874	2.82298	0.998629		0.0619	0.311933	-0.13654	-0.0623049		0.12764	0.655034	-0.06722	-0.0324499		0.062075	0.502632	-0.061425	-0.0321513		0.18295	0.935447	-0.012625	-0.00631708
	161.1	4.5527	5.65736	3.74796	0.999046		4.31776	5.23631	3.49318	0.999062		3.47273	5.01911	2.78083	0.997881		3.59097	4.67956	2.8236	0.99885		0.06168	0.310824	-0.13676	-0.0624053		0.12764	0.655034	-0.06722	-0.0324499		0.06165	0.49919	-0.06185	-0.0323737		0.183575	0.938642	-0.012	-0.00600435
	161.4	4.55566	5.66103	3.75092	0.999835		4.31744	5.23593	3.49286	0.99897		3.47253	5.01882	2.78063	0.997809		3.59238	4.68138	2.825	0.999346		0.06544	0.329772	-0.133	-0.0606896		0.12666	0.650005	-0.0682	-0.032923		0.059425	0.481174	-0.064075	-0.0335383		0.185575	0.948869	-0.01	-0.00500363
	161.7	4.55044	5.65455	3.7457	0.998443		4.31826	5.23692	3.49368	0.999205		3.47295	5.01944	2.78105	0.997962		3.59138	4.68008	2.824	0.998992		0.06398	0.322415	-0.13446	-0.0613558		0.12732	0.653392	-0.06754	-0.0326044		0.059625	0.482794	-0.063875	-0.0334337		0.18475	0.94465	-0.010825	-0.00541643
	162	4.5542	5.65922	3.74946	0.999446		4.31826	5.23692	3.49368	0.999205		3.47253	5.01882	2.78063	0.997809		3.59302	4.68223	2.82565	0.999575		0.0656	0.330579	-0.13284	-0.0606166		0.12698	0.651647	-0.06788	-0.0327685		0.06045	0.489474	-0.06305	-0.0330018		0.185175	0.946823	-0.0104	-0.00520377
	162.3	4.55272	5.65738	3.74798	0.999051		4.31876	5.23753	3.49418	0.999348		3.47295	5.01944	2.78105	0.997962		3.592	4.68089	2.82463	0.999213		0.06396	0.322314	-0.13448	-0.0613649		0.12828	0.658319	-0.06658	-0.032141		0.060625	0.490891	-0.062875	-0.0329102		0.182125	0.931228	-0.01345	-0.00672988
	162.6	4.55532	5.66061	3.75058	0.999744		4.31892	5.23772	3.49434	0.999394		3.4707	5.01619	2.7788	0.997154		3.59178	4.6806	2.8244	0.999133		0.06414	0.323221	-0.1343	-0.0612828		0.12716	0.652571	-0.0677	-0.0326816		0.062275	0.504251	-0.061225	-0.0320466		0.178875	0.914611	-0.0167	-0.00835606
	162.9	4.55468	5.65982	3.74994	0.999574		4.31874	5.2375	3.49416	0.999342		3.4729	5.01937	2.781	0.997944		3.5932	4.68246	2.82583	0.999637		0.06284	0.31667	-0.1356	-0.061876		0.12714	0.652468	-0.06772	-0.0326913		0.065125	0.527328	-0.058375	-0.0305548		0.180725	0.92407	-0.01485	-0.00743039
	163.2	4.55452	5.65962	3.74978	0.999531		4.31892	5.23772	3.49434	0.999394		3.4731	5.01966	2.7812	0.998016		3.59178	4.6806	2.8244	0.999133		0.06056	0.30518	-0.13788	-0.0629164		0.12832	0.658524	-0.06654	-0.0321217		0.0651	0.527126	-0.0584	-0.0305679		0.179875	0.919724	-0.0157	-0.0078557
	163.5	4.5545	5.65959	3.74976	0.999526		4.31842	5.23711	3.49384	0.999251		3.47352	5.02027	2.78163	0.998168		3.59198	4.68086	2.8246	0.999204		0.06024	0.303568	-0.1382	-0.0630624		0.12796	0.656677	-0.0669	-0.0322954		0.06595	0.534008	-0.05755	-0.030123		0.18135	0.927266	-0.014225	-0.00711766
	163.8	4.55566	5.66103	3.75092	0.999835		4.3217	5.24109	3.49712	1.00019		3.47273	5.01911	2.78083	0.997881		3.5922	4.68115	2.82483	0.999284		0.062	0.312437	-0.13644	-0.0622593		0.12828	0.658319	-0.06658	-0.032141		0.0645	0.522267	-0.059	-0.030882		0.18155	0.928288	-0.014025	-0.00701759
	164.1	4.55518	5.66044	3.75044	0.999707		4.31908	5.23792	3.4945	0.999439		3.47293	5.0194	2.78103	0.997953		3.59117	4.67982	2.8238	0.998921		0.06058	0.305281	-0.13786	-0.0629073		0.12748	0.654213	-0.06738	-0.0325272		0.062475	0.50587	-0.061025	-0.0319419		0.1791	0.915761	-0.016475	-0.00824348
	164.4	4.55368	5.65857	3.74894	0.999307		4.31876	5.23753	3.49418	0.999348		3.4727	5.01908	2.7808	0.997872		3.5918	4.68063	2.82443	0.999142		0.05748	0.289659	-0.14096	-0.0643218		0.12712	0.652366	-0.06774	-0.0327009		0.060825	0.49251	-0.062675	-0.0328055		0.1789	0.914739	-0.016675	-0.00834355
	164.7	4.5545	5.65959	3.74976	0.999526		4.31842	5.23711	3.49384	0.999251		3.4723	5.0185	2.7804	0.997729		3.59218	4.68112	2.8248	0.999275		0.05698	0.28714	-0.14146	-0.06455		0.1252	0.642513	-0.06966	-0.0336278		0.06065	0.491093	-0.06285	-0.0328971		0.17805	0.910392	-0.017525	-0.00876886
	165	4.55434	5.65939	3.7496	0.999483		4.31894	5.23775	3.49436	0.999399		3.47372	5.02056	2.78182	0.99824		3.592	4.68089	2.82463	0.999213		0.05698	0.28714	-0.14146	-0.06455		0.12568	0.644976	-0.06918	-0.0333961		0.06105	0.494332	-0.06245	-0.0326878		0.176225	0.901061	-0.01935	-0.00968202
	165.3	4.55418	5.65919	3.74944	0.99944		4.31842	5.23711	3.49384	0.999251		3.47253	5.01882	2.78063	0.997809		3.5914	4.68011	2.82402	0.999001		0.05632	0.283814	-0.14212	-0.0648512		0.12486	0.640768	-0.07	-0.0337919		0.059425	0.481174	-0.064075	-0.0335383		0.174575	0.892624	-0.021	-0.0105076
	165.6	4.55518	5.66044	3.75044	0.999707		4.31828	5.23694	3.4937	0.999211		3.47478	5.02208	2.78288	0.998617		3.59258	4.68164	2.8252	0.999416		0.05602	0.282302	-0.14242	-0.064988		0.12486	0.640768	-0.07	-0.0337919		0.06085	0.492713	-0.06265	-0.0327925		0.174625	0.89288	-0.02095	-0.0104826
	165.9	4.553	5.65773	3.74826	0.999126		4.31876	5.23753	3.49418	0.999348		3.47273	5.01911	2.78083	0.997881		3.59138	4.68008	2.824	0.998992		0.0547	0.27565	-0.14374	-0.0655904		0.1239	0.635841	-0.07096	-0.0342554		0.06065	0.491093	-0.06285	-0.0328971		0.173	0.884571	-0.022575	-0.0112957
	166.2	4.5545	5.65959	3.74976	0.999526		4.31828	5.23694	3.4937	0.999211		3.47355	5.02031	2.78165	0.998177		3.593	4.6822	2.82563	0.999567		0.05568	0.280589	-0.14276	-0.0651432		0.12454	0.639126	-0.07032	-0.0339464		0.060025	0.486032	-0.063475	-0.0332243		0.173375	0.886489	-0.0222	-0.0111081
	166.5	4.55402	5.659	3.74928	0.999398		4.31842	5.23711	3.49384	0.999251		3.47355	5.02031	2.78165	0.998177		3.5922	4.68115	2.82483	0.999284		0.05714	0.287946	-0.1413	-0.064477		0.1234	0.633275	-0.07146	-0.0344967		0.06125	0.495951	-0.06225	-0.0325831		0.17095	0.874089	-0.024625	-0.0123214
	166.8	4.55318	5.65795	3.74844	0.999174		4.31826	5.23692	3.49368	0.999205		3.47293	5.0194	2.78103	0.997953		3.5916	4.68037	2.82423	0.999071		0.05566	0.280488	-0.14278	-0.0651523		0.12488	0.64087	-0.06998	-0.0337823		0.059425	0.481174	-0.064075	-0.0335383		0.173	0.884571	-0.022575	-0.0112957
	167.1	4.5545	5.65959	3.74976	0.999526		4.31942	5.23833	3.49484	0.999537		3.47417	5.02121	2.78227	0.998401		3.59342	4.68275	2.82605	0.999717		0.0562	0.283209	-0.14224	-0.0649059		0.12502	0.641589	-0.06984	-0.0337147		0.06125	0.495951	-0.06225	-0.0325831		0.175025	0.894925	-0.02055	-0.0102825
	167.4	4.55418	5.65919	3.74944	0.99944		4.31988	5.23889	3.4953	0.999668		3.47415	5.02117	2.78225	0.998392		3.5918	4.68063	2.82443	0.999142		0.05618	0.283108	-0.14226	-0.064915		0.12566	0.644873	-0.0692	-0.0334057		0.059025	0.477935	-0.064475	-0.0337477		0.173175	0.885466	-0.0224	-0.0112081
	167.7	4.55322	5.658	3.74848	0.999184		4.31976	5.23874	3.49518	0.999634		3.4758	5.02356	2.7839	0.998984		3.592	4.68089	2.82463	0.999213		0.05454	0.274844	-0.1439	-0.0656634		0.12484	0.640665	-0.07002	-0.0338016		0.059625	0.482794	-0.063875	-0.0334337		0.173775	0.888534	-0.0218	-0.0109079
	168	4.55418	5.65919	3.74944	0.99944		4.31974	5.23872	3.49516	0.999628		3.47372	5.02056	2.78182	0.99824		3.59077	4.6793	2.8234	0.99878		0.05666	0.285527	-0.14178	-0.064696		0.1252	0.642513	-0.06966	-0.0336278		0.058825	0.476316	-0.064675	-0.0338524		0.17235	0.881248	-0.023225	-0.0116209
	168.3	4.55464	5.65977	3.7499	0.999563		4.31988	5.23889	3.4953	0.999668		3.47518	5.02266	2.78328	0.99876		3.59117	4.67982	2.8238	0.998921		0.05798	0.292179	-0.14046	-0.0640937		0.1247	0.639947	-0.07016	-0.0338692		0.0572	0.463158	-0.0663	-0.034703		0.17175	0.87818	-0.023825	-0.0119211
	168.6	4.55468	5.65982	3.74994	0.999574		4.32024	5.23932	3.49566	0.999771		3.4748	5.02211	2.7829	0.998626		3.5918	4.68063	2.82443	0.999142		0.05812	0.292884	-0.14032	-0.0640298		0.12618	0.647542	-0.06868	-0.0331547		0.057175	0.462955	-0.066325	-0.034716		0.170725	0.872939	-0.02485	-0.012434
	168.9	4.55502	5.66024	3.75028	0.999664		4.31942	5.23833	3.49484	0.999537		3.476	5.02385	2.7841	0.999056		3.59158	4.68034	2.8242	0.999063		0.0565	0.284721	-0.14194	-0.064769		0.12554	0.644257	-0.06932	-0.0334637		0.061875	0.501012	-0.061625	-0.032256		0.1746	0.892752	-0.020975	-0.0104951
	169.2	4.55514	5.66039	3.7504	0.999696		4.31972	5.23869	3.49514	0.999622		3.47435	5.02146	2.78245	0.998464		3.59138	4.68008	2.824	0.998992		0.05504	0.277363	-0.1434	-0.0654352		0.12714	0.652468	-0.06772	-0.0326913		0.06145	0.497571	-0.06205	-0.0324784		0.173975	0.889556	-0.0216	-0.0108078
	169.5	4.55238	5.65696	3.74764	0.99896		4.31926	5.23813	3.49468	0.999491		3.47375	5.0206	2.78185	0.998249		3.59097	4.67956	2.8236	0.99885		0.0547	0.27565	-0.14374	-0.0655904		0.1278	0.655855	-0.06706	-0.0323727		0.05925	0.479757	-0.06425	-0.0336299		0.1742	0.890707	-0.021375	-0.0106953
	169.8	4.55402	5.659	3.74928	0.999398		4.31988	5.23889	3.4953	0.999668		3.4756	5.02327	2.7837	0.998913		3.5922	4.68115	2.82483	0.999284		0.05714	0.287946	-0.1413	-0.064477		0.13026	0.66848	-0.0646	-0.0311851		0.05965	0.482996	-0.06385	-0.0334206		0.174625	0.89288	-0.02095	-0.0104826
	170.1	4.5545	5.65959	3.74976	0.999526		4.31924	5.23811	3.49466	0.999485		3.4752	5.02269	2.7833	0.998769		3.592	4.68089	2.82463	0.999213		0.05778	0.291171	-0.14066	-0.0641849		0.1291	0.662527	-0.06576	-0.0317451		0.0586	0.474494	-0.0649	-0.0339702		0.1762	0.900933	-0.019375	-0.00969453
	170.4	4.5545	5.65959	3.74976	0.999526		4.32006	5.2391	3.49548	0.99972		3.47618	5.0241	2.78428	0.999119		3.5928	4.68194	2.82543	0.999496		0.05828	0.293691	-0.14016	-0.0639568		0.12796	0.656677	-0.0669	-0.0322954		0.05925	0.479757	-0.06425	-0.0336299		0.1746	0.892752	-0.020975	-0.0104951
	170.7	4.55336	5.65818	3.74862	0.999222		4.32006	5.2391	3.49548	0.99972		3.47495	5.02233	2.78305	0.998679		3.592	4.68089	2.82463	0.999213		0.05666	0.285527	-0.14178	-0.064696		0.1265	0.649184	-0.06836	-0.0330002		0.058625	0.474696	-0.064875	-0.0339571		0.170325	0.870894	-0.02525	-0.0126342
	171	4.55418	5.65919	3.74944	0.99944		4.31974	5.23872	3.49516	0.999628		3.47478	5.02208	2.78288	0.998617		3.59198	4.68086	2.8246	0.999204		0.05828	0.293691	-0.14016	-0.0639568		0.12632	0.64826	-0.06854	-0.0330871		0.06125	0.495951	-0.06225	-0.0325831		0.1687	0.862585	-0.026875	-0.0134472
	171.3	4.55448	5.65957	3.74974	0.99952		4.3191	5.23794	3.49452	0.999445		3.47475	5.02204	2.78285	0.998608		3.59238	4.68138	2.825	0.999346		0.0591	0.297823	-0.13934	-0.0635826		0.12682	0.650826	-0.06804	-0.0328458		0.0588	0.476113	-0.0647	-0.0338655		0.166875	0.853253	-0.0287	-0.0143604
	171.6	4.55418	5.65919	3.74944	0.99944		4.31894	5.23775	3.49436	0.999399		3.47452	5.02172	2.78262	0.998527		3.59117	4.67982	2.8238	0.998921		0.05878	0.29621	-0.13966	-0.0637286		0.127	0.65175	-0.06786	-0.0327589		0.055575	0.45	-0.067925	-0.0355535		0.165625	0.846862	-0.02995	-0.0149859
	171.9	4.55336	5.65818	3.74862	0.999222		4.31926	5.23813	3.49468	0.999491		3.47455	5.02175	2.78265	0.998536		3.59158	4.68034	2.8242	0.999063		0.0573	0.288752	-0.14114	-0.064404		0.1278	0.655855	-0.06706	-0.0323727		0.056175	0.454858	-0.067325	-0.0352395		0.16585	0.848012	-0.029725	-0.0148733
	172.2	4.55386	5.6588	3.74912	0.999355		4.31974	5.23872	3.49516	0.999628		3.47475	5.02204	2.78285	0.998608		3.59158	4.68034	2.8242	0.999063		0.05796	0.292078	-0.14048	-0.0641028		0.12714	0.652468	-0.06772	-0.0326913		0.056375	0.456478	-0.067125	-0.0351348		0.167475	0.856321	-0.0281	-0.0140602
	172.5	4.5532	5.65798	3.74846	0.999179		4.31926	5.23813	3.49468	0.999491		3.47392	5.02085	2.78202	0.998312		3.59178	4.6806	2.8244	0.999133		0.05614	0.282907	-0.1423	-0.0649333		0.12666	0.650005	-0.0682	-0.032923		0.058625	0.474696	-0.064875	-0.0339571		0.168075	0.859389	-0.0275	-0.01376
	172.8	4.55466	5.65979	3.74992	0.999568		4.3186	5.23733	3.49402	0.999302		3.47452	5.02172	2.78262	0.998527		3.59075	4.67926	2.82337	0.998771		0.05616	0.283007	-0.14228	-0.0649242		0.12586	0.6459	-0.069	-0.0333092		0.059625	0.482794	-0.063875	-0.0334337		0.167875	0.858366	-0.0277	-0.01386
	173.1	4.55336	5.65818	3.74862	0.999222		4.31974	5.23872	3.49516	0.999628		3.4756	5.02327	2.7837	0.998913		3.5918	4.68063	2.82443	0.999142		0.0573	0.288752	-0.14114	-0.064404		0.126	0.646618	-0.06886	-0.0332416		0.059825	0.484413	-0.063675	-0.033329		0.166875	0.853253	-0.0287	-0.0143604
	173.4	4.5545	5.65959	3.74976	0.999526		4.3204	5.23952	3.49582	0.999817		3.47372	5.02056	2.78182	0.99824		3.59198	4.68086	2.8246	0.999204		0.0568	0.286233	-0.14164	-0.0646321		0.12586	0.6459	-0.069	-0.0333092		0.05985	0.484615	-0.06365	-0.0333159		0.1661	0.849291	-0.029475	-0.0147482
	173.7	4.55482	5.65999	3.75008	0.999611		4.32024	5.23932	3.49566	0.999771		3.47538	5.02294	2.78348	0.998832		3.5926	4.68167	2.82523	0.999425		0.0581	0.292784	-0.14034	-0.0640389		0.1275	0.654316	-0.06736	-0.0325175		0.062275	0.504251	-0.061225	-0.0320466		0.16565	0.84699	-0.029925	-0.0149734
	174	4.55418	5.65919	3.74944	0.99944		4.31976	5.23874	3.49518	0.999634		3.47498	5.02237	2.78308	0.998688		3.5922	4.68115	2.82483	0.999284		0.05828	0.293691	-0.14016	-0.0639568		0.12356	0.634096	-0.0713	-0.0344195		0.062475	0.50587	-0.061025	-0.0319419		0.16525	0.844944	-0.030325	-0.0151735
	174.3	4.55402	5.659	3.74928	0.999398		4.31976	5.23874	3.49518	0.999634		3.47498	5.02237	2.78308	0.998688		3.59178	4.6806	2.8244	0.999133		0.0557	0.280689	-0.14274	-0.0651341		0.12308	0.631633	-0.07178	-0.0346512		0.06205	0.502429	-0.06145	-0.0321644		0.16525	0.844944	-0.030325	-0.0151735
	174.6	4.55432	5.65937	3.74958	0.999478		4.32072	5.2399	3.49614	0.999908		3.47518	5.02266	2.78328	0.99876		3.59278	4.6819	2.8254	0.999487		0.05502	0.277263	-0.14342	-0.0654444		0.12486	0.640768	-0.07	-0.0337919		0.06225	0.504049	-0.06125	-0.0320597		0.164425	0.840726	-0.03115	-0.0155863
	174.9	4.55548	5.66081	3.75074	0.999787		4.31942	5.23833	3.49484	0.999537		3.47475	5.02204	2.78285	0.998608		3.59117	4.67982	2.8238	0.998921		0.05618	0.283108	-0.14226	-0.064915		0.12326	0.632557	-0.0716	-0.0345643		0.062275	0.504251	-0.061225	-0.0320466		0.16585	0.848012	-0.029725	-0.0148733
	175.2	4.55338	5.6582	3.74864	0.999227		4.31974	5.23872	3.49516	0.999628		3.47498	5.02237	2.78308	0.998688		3.593	4.6822	2.82563	0.999567		0.05354	0.269804	-0.1449	-0.0661197		0.12128	0.622396	-0.07358	-0.0355202		0.062275	0.504251	-0.061225	-0.0320466		0.1685	0.861562	-0.027075	-0.0135473
	175.5	4.5553	5.66059	3.75056	0.999739		4.31944	5.23835	3.49486	0.999542		3.47372	5.02056	2.78182	0.99824		3.5932	4.68246	2.82583	0.999637		0.05436	0.273937	-0.14408	-0.0657455		0.12162	0.62414	-0.07324	-0.035356		0.063075	0.510729	-0.060425	-0.0316278		0.168075	0.859389	-0.0275	-0.01376
	175.8	4.55336	5.65818	3.74862	0.999222		4.32072	5.2399	3.49614	0.999908		3.47498	5.02237	2.78308	0.998688		3.5936	4.68298	2.82622	0.999779		0.05292	0.26668	-0.14552	-0.0664026		0.11998	0.615724	-0.07488	-0.0361477		0.06285	0.508907	-0.06065	-0.0317456		0.165825	0.847884	-0.02975	-0.0148858
	176.1	4.55368	5.65857	3.74894	0.999307		4.31976	5.23874	3.49518	0.999634		3.47518	5.02266	2.78328	0.99876		3.5934	4.68272	2.82603	0.999708		0.05356	0.269905	-0.14488	-0.0661106		0.11984	0.615006	-0.07502	-0.0362153		0.062675	0.50749	-0.060825	-0.0318372		0.164225	0.839703	-0.03135	-0.0156864
	176.4	4.55418	5.65919	3.74944	0.99944		4.31992	5.23893	3.49534	0.99968		3.47602	5.02388	2.78412	0.999065		3.5932	4.68246	2.82583	0.999637		0.0539	0.271619	-0.14454	-0.0659554		0.11838	0.607513	-0.07648	-0.0369201		0.0639	0.517409	-0.0596	-0.031196		0.1628	0.832417	-0.032775	-0.0163994
	176.7	4.55368	5.65857	3.74894	0.999307		4.32022	5.2393	3.49564	0.999765		3.47863	5.02764	2.78673	0.999998		3.5934	4.68272	2.82603	0.999708		0.05374	0.270812	-0.1447	-0.0660284		0.11884	0.609874	-0.07602	-0.036698		0.06495	0.525911	-0.05855	-0.0306464		0.161175	0.824108	-0.0344	-0.0172125
	177	4.5545	5.65959	3.74976	0.999526		4.31912	5.23796	3.49454	0.999451		3.47515	5.02262	2.78325	0.998751		3.5932	4.68246	2.82583	0.999637		0.0552	0.27817	-0.14324	-0.0653622		0.11706	0.600739	-0.0778	-0.0375573		0.061675	0.499393	-0.061825	-0.0323606		0.1626	0.831395	-0.032975	-0.0164995
	177.3	4.55288	5.65758	3.74814	0.999094		4.31912	5.23796	3.49454	0.999451		3.47558	5.02323	2.78368	0.998904		3.59422	4.68379	2.82685	1		0.05422	0.273231	-0.14422	-0.0658094		0.11788	0.604947	-0.07698	-0.0371615		0.06165	0.49919	-0.06185	-0.0323737		0.1628	0.832417	-0.032775	-0.0163994
	177.6	4.55336	5.65818	3.74862	0.999222		4.31944	5.23835	3.49486	0.999542		3.47455	5.02175	2.78265	0.998536		3.5928	4.68194	2.82543	0.999496		0.05534	0.278875	-0.1431	-0.0652983		0.11786	0.604845	-0.077	-0.0371711		0.06125	0.495951	-0.06225	-0.0325831		0.16115	0.823981	-0.034425	-0.017225
	177.9	4.55322	5.658	3.74848	0.999184		4.3191	5.23794	3.49452	0.999445		3.47475	5.02204	2.78285	0.998608		3.5936	4.68298	2.82622	0.999779		0.0552	0.27817	-0.14324	-0.0653622		0.11704	0.600636	-0.07782	-0.037567		0.064725	0.524089	-0.058775	-0.0307642		0.159975	0.817973	-0.0356	-0.0178129
	178.2	4.55318	5.65795	3.74844	0.999174		4.32024	5.23932	3.49566	0.999771		3.47458	5.02179	2.78267	0.998545		3.5934	4.68272	2.82603	0.999708		0.05552	0.279782	-0.14292	-0.0652162		0.11754	0.603202	-0.07732	-0.0373256		0.063075	0.510729	-0.060425	-0.0316278		0.160975	0.823086	-0.0346	-0.0173126
	178.5	4.55402	5.659	3.74928	0.999398		4.31944	5.23835	3.49486	0.999542		3.47432	5.02143	2.78242	0.998455		3.5924	4.68141	2.82503	0.999354		0.05896	0.297118	-0.13948	-0.0636465		0.11558	0.593144	-0.07928	-0.0382718		0.059625	0.482794	-0.063875	-0.0334337		0.160375	0.820018	-0.0352	-0.0176128
	178.8	4.5537	5.6586	3.74896	0.999312		4.32008	5.23913	3.4955	0.999725		3.47455	5.02175	2.78265	0.998536		3.5934	4.68272	2.82603	0.999708		0.05698	0.28714	-0.14146	-0.06455		0.11674	0.599097	-0.07812	-0.0377118		0.058425	0.473077	-0.065075	-0.0340618		0.16035	0.81989	-0.035225	-0.0176253
	179.1	4.55628	5.6618	3.75154	1		4.32008	5.23913	3.4955	0.999725		3.47475	5.02204	2.78285	0.998608		3.5924	4.68141	2.82503	0.999354		0.05844	0.294497	-0.14	-0.0638838		0.11658	0.598276	-0.07828	-0.037789		0.0574	0.464777	-0.0661	-0.0345983		0.159525	0.815672	-0.03605	-0.0180381
	179.4	4.554	5.65897	3.74926	0.999392		4.31942	5.23833	3.49484	0.999537		3.47498	5.02237	2.78308	0.998688		3.5926	4.68167	2.82523	0.999425		0.05828	0.293691	-0.14016	-0.0639568		0.11982	0.614903	-0.07504	-0.036225		0.058	0.469636	-0.0655	-0.0342842		0.16015	0.818867	-0.035425	-0.0177254
	179.7	4.55236	5.65693	3.74762	0.998955		4.32008	5.23913	3.4955	0.999725		3.47538	5.02294	2.78348	0.998832		3.5928	4.68194	2.82543	0.999496		0.05634	0.283915	-0.1421	-0.064842		0.12242	0.628246	-0.07244	-0.0349698		0.05925	0.479757	-0.06425	-0.0336299		0.159525	0.815672	-0.03605	-0.0180381
	180	4.55334	5.65815	3.7486	0.999216		4.31992	5.23893	3.49534	0.99968		3.47602	5.02388	2.78412	0.999065		3.593	4.6822	2.82563	0.999567		0.05858	0.295203	-0.13986	-0.0638199		0.12112	0.621574	-0.07374	-0.0355974		0.059025	0.477935	-0.064475	-0.0337477		0.1618	0.827304	-0.033775	-0.0168998
	180.3	4.55432	5.65937	3.74958	0.999478		4.32024	5.23932	3.49566	0.999771		3.4758	5.02356	2.7839	0.998984		3.5922	4.68115	2.82483	0.999284		0.05958	0.300242	-0.13886	-0.0633636		0.1229	0.630709	-0.07196	-0.0347381		0.057425	0.46498	-0.066075	-0.0345852		0.161575	0.826154	-0.034	-0.0170123
	180.6	4.554	5.65897	3.74926	0.999392		4.3204	5.23952	3.49582	0.999817		3.47273	5.01911	2.78083	0.997881		3.5924	4.68141	2.82503	0.999354		0.05876	0.29611	-0.13968	-0.0637377		0.12438	0.638304	-0.07048	-0.0340237		0.054525	0.441498	-0.068975	-0.0361031		0.1624	0.830372	-0.033175	-0.0165995
	180.9	4.5527	5.65736	3.74796	0.999046		4.32168	5.24107	3.4971	1.00018		3.47455	5.02175	2.78265	0.998536		3.5922	4.68115	2.82483	0.999284		0.05926	0.298629	-0.13918	-0.0635096		0.12324	0.632454	-0.07162	-0.034574		0.056775	0.459717	-0.066725	-0.0349254		0.163225	0.83459	-0.03235	-0.0161867
	181.2	4.5527	5.65736	3.74796	0.999046		4.3204	5.23952	3.49582	0.999817		3.47475	5.02204	2.78285	0.998608		3.5924	4.68141	2.82503	0.999354		0.0609	0.306894	-0.13754	-0.0627612		0.12372	0.634917	-0.07114	-0.0343423		0.058225	0.471457	-0.065275	-0.0341664		0.165425	0.845839	-0.03015	-0.0150859
	181.5	4.5545	5.65959	3.74976	0.999526		4.32024	5.23932	3.49566	0.999771		3.47435	5.02146	2.78245	0.998464		3.592	4.68089	2.82463	0.999213		0.06138	0.309313	-0.13706	-0.0625422		0.1257	0.645079	-0.06916	-0.0333864		0.059425	0.481174	-0.064075	-0.0335383		0.16545	0.845967	-0.030125	-0.0150734
	181.8	4.55336	5.65818	3.74862	0.999222		4.32008	5.23913	3.4955	0.999725		3.47455	5.02175	2.78265	0.998536		3.59218	4.68112	2.8248	0.999275		0.05924	0.298529	-0.1392	-0.0635187		0.12406	0.636662	-0.0708	-0.0341781		0.062875	0.509109	-0.060625	-0.0317325		0.164825	0.842771	-0.03075	-0.0153862
	182.1	4.55286	5.65755	3.74812	0.999088		4.31992	5.23893	3.49534	0.99968		3.47518	5.02266	2.78328	0.99876		3.5932	4.68246	2.82583	0.999637		0.0599	0.301854	-0.13854	-0.0632176		0.12568	0.644976	-0.06918	-0.0333961		0.06205	0.502429	-0.06145	-0.0321644		0.165625	0.846862	-0.02995	-0.0149859
	182.4	4.5527	5.65736	3.74796	0.999046		4.3204	5.23952	3.49582	0.999817		3.47495	5.02233	2.78305	0.998679		3.592	4.68089	2.82463	0.999213		0.06042	0.304475	-0.13802	-0.0629803		0.12746	0.654111	-0.0674	-0.0325368		0.058225	0.471457	-0.065275	-0.0341664		0.164625	0.841749	-0.03095	-0.0154862
	182.7	4.55384	5.65877	3.7491	0.99935		4.32072	5.2399	3.49614	0.999908		3.47518	5.02266	2.78328	0.99876		3.5926	4.68167	2.82523	0.999425		0.06204	0.312639	-0.1364	-0.062241		0.12942	0.664169	-0.06544	-0.0315906		0.059025	0.477935	-0.064475	-0.0337477		0.163825	0.837658	-0.03175	-0.0158865
	183	4.55386	5.6588	3.74912	0.999355		4.3204	5.23952	3.49582	0.999817		3.4762	5.02414	2.7843	0.999128		3.5932	4.68246	2.82583	0.999637		0.06186	0.311732	-0.13658	-0.0623232		0.12796	0.656677	-0.0669	-0.0322954		0.055975	0.453239	-0.067525	-0.0353442		0.163825	0.837658	-0.03175	-0.0158865
	183.3	4.554	5.65897	3.74926	0.999392		4.3204	5.23952	3.49582	0.999817		3.4752	5.02269	2.7833	0.998769		3.5932	4.68246	2.82583	0.999637		0.06072	0.305987	-0.13772	-0.0628434		0.12682	0.650826	-0.06804	-0.0328458		0.05415	0.438462	-0.06935	-0.0362994		0.1628	0.832417	-0.032775	-0.0163994
	183.6	4.5532	5.65798	3.74846	0.999179		4.32104	5.24029	3.49646	1		3.47662	5.02475	2.78472	0.999281		3.593	4.6822	2.82563	0.999567		0.06058	0.305281	-0.13786	-0.0629073		0.1255	0.644052	-0.06936	-0.033483		0.05495	0.444939	-0.06855	-0.0358807		0.163	0.83344	-0.032575	-0.0162993
	183.9	4.55434	5.65939	3.7496	0.999483		4.31992	5.23893	3.49534	0.99968		3.4762	5.02414	2.7843	0.999128		3.592	4.68089	2.82463	0.999213		0.06058	0.305281	-0.13786	-0.0629073		0.12422	0.637483	-0.07064	-0.0341009		0.05475	0.44332	-0.06875	-0.0359853		0.162775	0.832289	-0.0328	-0.0164119
	184.2	4.55156	5.65594	3.74682	0.998742		4.3199	5.23891	3.49532	0.999674		3.47455	5.02175	2.78265	0.998536		3.593	4.6822	2.82563	0.999567		0.05812	0.292884	-0.14032	-0.0640298		0.12374	0.63502	-0.07112	-0.0343326		0.05475	0.44332	-0.06875	-0.0359853		0.162825	0.832545	-0.03275	-0.0163869
	184.5	4.55288	5.65758	3.74814	0.999094		4.3204	5.23952	3.49582	0.999817		3.47618	5.0241	2.78428	0.999119		3.5922	4.68115	2.82483	0.999284		0.05878	0.29621	-0.13966	-0.0637286		0.12292	0.630812	-0.07194	-0.0347285		0.05415	0.438462	-0.06935	-0.0362994		0.161375	0.825131	-0.0342	-0.0171124
	184.8	4.55368	5.65857	3.74894	0.999307		4.31992	5.23893	3.49534	0.99968		3.47538	5.02294	2.78348	0.998832		3.593	4.6822	2.82563	0.999567		0.0596	0.300343	-0.13884	-0.0633544		0.12148	0.623422	-0.07338	-0.0354236		0.05355	0.433603	-0.06995	-0.0366135		0.1626	0.831395	-0.032975	-0.0164995
	185.1	4.55288	5.65758	3.74814	0.999094		4.32056	5.23971	3.49598	0.999863		3.47395	5.02088	2.78205	0.998321		3.5928	4.68194	2.82543	0.999496		0.05714	0.287946	-0.1413	-0.064477		0.12258	0.629067	-0.07228	-0.0348926		0.0523	0.423482	-0.0712	-0.0372677		0.162825	0.832545	-0.03275	-0.0163869
	185.4	4.55432	5.65937	3.74958	0.999478		4.32006	5.2391	3.49548	0.99972		3.476	5.02385	2.7841	0.999056		3.5928	4.68194	2.82543	0.999496		0.05712	0.287845	-0.14132	-0.0644861		0.12162	0.62414	-0.07324	-0.035356		0.052275	0.423279	-0.071225	-0.0372808		0.16525	0.844944	-0.030325	-0.0151735
	185.7	4.55352	5.65837	3.74878	0.999264		4.32008	5.23913	3.4955	0.999725		3.47372	5.02056	2.78182	0.99824		3.5918	4.68063	2.82443	0.999142		0.05552	0.279782	-0.14292	-0.0652162		0.12032	0.617469	-0.07454	-0.0359836		0.049675	0.402227	-0.073825	-0.0386417		0.165875	0.84814	-0.0297	-0.0148608
	186	4.55416	5.65917	3.74942	0.999435		4.31942	5.23833	3.49484	0.999537		3.47432	5.02143	2.78242	0.998455		3.592	4.68089	2.82463	0.999213		0.05666	0.285527	-0.14178	-0.064696		0.1195	0.613261	-0.07536	-0.0363794		0.050675	0.410324	-0.072825	-0.0381183		0.164625	0.841749	-0.03095	-0.0154862
	186.3	4.55304	5.65778	3.7483	0.999136		4.32008	5.23913	3.4955	0.999725		3.47578	5.02352	2.78388	0.998976		3.5916	4.68037	2.82423	0.999071		0.05844	0.294497	-0.14	-0.0638838		0.12016	0.616648	-0.0747	-0.0360608		0.051275	0.415182	-0.072225	-0.0378042		0.16665	0.852103	-0.028925	-0.014473
	186.6	4.55254	5.65716	3.7478	0.999003		4.31944	5.23835	3.49486	0.999542		3.47478	5.02208	2.78288	0.998617		3.5922	4.68115	2.82483	0.999284		0.06072	0.305987	-0.13772	-0.0628434		0.12	0.615827	-0.07486	-0.0361381		0.049275	0.398988	-0.074225	-0.0388511		0.165025	0.843794	-0.03055	-0.0152861
	186.9	4.55368	5.65857	3.74894	0.999307		4.32008	5.23913	3.4955	0.999725		3.47475	5.02204	2.78285	0.998608		3.5926	4.68167	2.82523	0.999425		0.06314	0.318182	-0.1353	-0.0617391		0.12196	0.625885	-0.0729	-0.0351919		0.052925	0.428543	-0.070575	-0.0369406		0.162	0.828327	-0.033575	-0.0167997
	187.2	4.55352	5.65837	3.74878	0.999264		4.3191	5.23794	3.49452	0.999445		3.47478	5.02208	2.78288	0.998617		3.5922	4.68115	2.82483	0.999284		0.06412	0.32312	-0.13432	-0.0612919		0.12308	0.631633	-0.07178	-0.0346512		0.05475	0.44332	-0.06875	-0.0359853		0.161575	0.826154	-0.034	-0.0170123
	187.5	4.55338	5.6582	3.74864	0.999227		4.3191	5.23794	3.49452	0.999445		3.47435	5.02146	2.78245	0.998464		3.5916	4.68037	2.82423	0.999071		0.06138	0.309313	-0.13706	-0.0625422		0.12342	0.633378	-0.07144	-0.0344871		0.052725	0.426923	-0.070775	-0.0370453		0.15995	0.817845	-0.035625	-0.0178254
	187.8	4.55288	5.65758	3.74814	0.999094		4.31958	5.23852	3.495	0.999582		3.47392	5.02085	2.78202	0.998312		3.5918	4.68063	2.82443	0.999142		0.0604	0.304374	-0.13804	-0.0629894		0.12162	0.62414	-0.07324	-0.035356		0.0509	0.412146	-0.0726	-0.0380005		0.159725	0.816694	-0.03585	-0.017938
	188.1	4.55256	5.65718	3.74782	0.999008		4.31956	5.2385	3.49498	0.999577		3.47538	5.02294	2.78348	0.998832		3.5926	4.68167	2.82523	0.999425		0.05944	0.299536	-0.139	-0.0634275		0.12114	0.621677	-0.07372	-0.0355877		0.053725	0.43502	-0.069775	-0.0365219		0.15995	0.817845	-0.035625	-0.0178254
	188.4	4.55304	5.65778	3.7483	0.999136		4.3194	5.2383	3.49482	0.999531		3.47415	5.02117	2.78225	0.998392		3.5924	4.68141	2.82503	0.999354		0.05974	0.301048	-0.1387	-0.0632906		0.1234	0.633275	-0.07146	-0.0344967		0.054325	0.439879	-0.069175	-0.0362078		0.157925	0.807491	-0.03765	-0.0188387
	188.7	4.5535	5.65835	3.74876	0.999259		4.3194	5.2383	3.49482	0.999531		3.47452	5.02172	2.78262	0.998527		3.5926	4.68167	2.82523	0.999425		0.06156	0.31022	-0.13688	-0.0624601		0.1234	0.633275	-0.07146	-0.0344967		0.05555	0.449798	-0.06795	-0.0355666		0.157725	0.806468	-0.03785	-0.0189387
	189	4.55628	5.6618	3.75154	1		4.31974	5.23872	3.49516	0.999628		3.47518	5.02266	2.78328	0.99876		3.5922	4.68115	2.82483	0.999284		0.06266	0.315763	-0.13578	-0.0619581		0.12356	0.634096	-0.0713	-0.0344195		0.0578	0.468016	-0.0657	-0.0343889		0.158925	0.812604	-0.03665	-0.0183383
	189.3	4.5532	5.65798	3.74846	0.999179		4.31908	5.23792	3.4945	0.999439		3.47452	5.02172	2.78262	0.998527		3.59117	4.67982	2.8238	0.998921		0.05958	0.300242	-0.13886	-0.0633636		0.12242	0.628246	-0.07244	-0.0349698		0.0521	0.421862	-0.0714	-0.0373724		0.16055	0.820913	-0.035025	-0.0175252
	189.6	4.55352	5.65837	3.74878	0.999264		4.31874	5.2375	3.49416	0.999342		3.476	5.02385	2.7841	0.999056		3.593	4.6822	2.82563	0.999567		0.06136	0.309212	-0.13708	-0.0625513		0.12178	0.624962	-0.07308	-0.0352788		0.04865	0.393927	-0.07485	-0.0391782		0.1624	0.830372	-0.033175	-0.0165995
	189.9	4.554	5.65897	3.74926	0.999392		4.3181	5.23673	3.49352	0.999159		3.47498	5.02237	2.78308	0.998688		3.59178	4.6806	2.8244	0.999133		0.06154	0.310119	-0.1369	-0.0624692		0.12196	0.625885	-0.0729	-0.0351919		0.047225	0.382389	-0.076275	-0.0399241		0.162825	0.832545	-0.03275	-0.0163869
	190.2	4.55126	5.65557	3.74652	0.998662		4.31924	5.23811	3.49466	0.999485		3.47803	5.02677	2.78613	0.999783		3.5924	4.68141	2.82503	0.999354		0.05912	0.297924	-0.13932	-0.0635735		0.1234	0.633275	-0.07146	-0.0344967		0.04905	0.397166	-0.07445	-0.0389689		0.163625	0.836636	-0.03195	-0.0159866
	190.5	4.5532	5.65798	3.74846	0.999179		4.31846	5.23716	3.49388	0.999262		3.47498	5.02237	2.78308	0.998688		3.5924	4.68141	2.82503	0.999354		0.05894	0.297017	-0.1395	-0.0636556		0.12308	0.631633	-0.07178	-0.0346512		0.046975	0.380364	-0.076525	-0.040055		0.163175	0.834335	-0.0324	-0.0162118
	190.8	4.55174	5.65616	3.747	0.99879		4.31958	5.23852	3.495	0.999582		3.47415	5.02117	2.78225	0.998392		3.5918	4.68063	2.82443	0.999142		0.05746	0.289559	-0.14098	-0.064331		0.12098	0.620856	-0.07388	-0.035665		0.047025	0.380769	-0.076475	-0.0400288		0.163625	0.836636	-0.03195	-0.0159866
	191.1	4.55028	5.65435	3.74554	0.998401		4.31956	5.2385	3.49498	0.999577		3.47372	5.02056	2.78182	0.99824		3.592	4.68089	2.82463	0.999213		0.05568	0.280589	-0.14276	-0.0651432		0.11982	0.614903	-0.07504	-0.036225		0.04905	0.397166	-0.07445	-0.0389689		0.1612	0.824236	-0.034375	-0.0172
	191.4	4.55142	5.65576	3.74668	0.998705		4.31942	5.23833	3.49484	0.999537		3.47455	5.02175	2.78265	0.998536		3.5928	4.68194	2.82543	0.999496		0.05584	0.281395	-0.1426	-0.0650702		0.12064	0.619111	-0.07422	-0.0358291		0.049475	0.400607	-0.074025	-0.0387464		0.16075	0.821935	-0.034825	-0.0174251
	191.7	4.55108	5.65534	3.74634	0.998614		4.31926	5.23813	3.49468	0.999491		3.47375	5.0206	2.78185	0.998249		3.5918	4.68063	2.82443	0.999142		0.05746	0.289559	-0.14098	-0.064331		0.1221	0.626604	-0.07276	-0.0351243		0.04845	0.392308	-0.07505	-0.0392829		0.161575	0.826154	-0.034	-0.0170123
	192	4.55254	5.65716	3.7478	0.999003		4.31954	5.23847	3.49496	0.999571		3.47355	5.02031	2.78165	0.998177		3.5922	4.68115	2.82483	0.999284		0.05682	0.286333	-0.14162	-0.064623		0.12178	0.624962	-0.07308	-0.0352788		0.050875	0.411943	-0.072625	-0.0380136		0.1628	0.832417	-0.032775	-0.0163994
	192.3	4.55172	5.65614	3.74698	0.998784		4.31958	5.23852	3.495	0.999582		3.47578	5.02352	2.78388	0.998976		3.5918	4.68063	2.82443	0.999142		0.0555	0.279682	-0.14294	-0.0652253		0.12424	0.637586	-0.07062	-0.0340912		0.054525	0.441498	-0.068975	-0.0361031		0.1646	0.841621	-0.030975	-0.0154987
	192.6	4.5519	5.65636	3.74716	0.998832		4.31956	5.2385	3.49498	0.999577		3.47415	5.02117	2.78225	0.998392		3.59057	4.67904	2.8232	0.998709		0.05518	0.278069	-0.14326	-0.0653713		0.1247	0.639947	-0.07016	-0.0338692		0.05535	0.448178	-0.06815	-0.0356713		0.164825	0.842771	-0.03075	-0.0153862
	192.9	4.55156	5.65594	3.74682	0.998742		4.31956	5.2385	3.49498	0.999577		3.47415	5.02117	2.78225	0.998392		3.5914	4.68011	2.82402	0.999001		0.05484	0.276356	-0.1436	-0.0655265		0.12358	0.634199	-0.07128	-0.0344098		0.054925	0.444737	-0.068575	-0.0358937		0.165225	0.844817	-0.03035	-0.015186
	193.2	4.55074	5.65492	3.746	0.998523		4.3199	5.23891	3.49532	0.999674		3.47375	5.0206	2.78185	0.998249		3.59037	4.67878	2.823	0.998638		0.05226	0.263354	-0.14618	-0.0667038		0.12308	0.631633	-0.07178	-0.0346512		0.0519	0.420243	-0.0716	-0.0374771		0.1638	0.83753	-0.031775	-0.015899
	193.5	4.5514	5.65574	3.74666	0.998699		4.31874	5.2375	3.49416	0.999342		3.47415	5.02117	2.78225	0.998392		3.59158	4.68034	2.8242	0.999063		0.05406	0.272425	-0.14438	-0.0658824		0.1229	0.630709	-0.07196	-0.0347381		0.051075	0.413563	-0.072425	-0.0379089		0.163825	0.837658	-0.03175	-0.0158865
	193.8	4.55254	5.65716	3.7478	0.999003		4.3196	5.23855	3.49502	0.999588		3.47417	5.02121	2.78227	0.998401		3.592	4.68089	2.82463	0.999213		0.05538	0.279077	-0.14306	-0.0652801		0.12422	0.637483	-0.07064	-0.0341009		0.05085	0.411741	-0.07265	-0.0380267		0.164225	0.839703	-0.03135	-0.0156864
	194.1	4.55238	5.65696	3.74764	0.99896		4.31894	5.23775	3.49436	0.999399		3.47375	5.0206	2.78185	0.998249		3.5918	4.68063	2.82443	0.999142		0.0552	0.27817	-0.14324	-0.0653622		0.12258	0.629067	-0.07228	-0.0348926		0.04905	0.397166	-0.07445	-0.0389689		0.164625	0.841749	-0.03095	-0.0154862
	194.4	4.55158	5.65596	3.74684	0.998747		4.31842	5.23711	3.49384	0.999251		3.47412	5.02114	2.78222	0.998383		3.5914	4.68011	2.82402	0.999001		0.055	0.277162	-0.14344	-0.0654535		0.12226	0.627425	-0.0726	-0.0350471		0.04985	0.403644	-0.07365	-0.0385501		0.166475	0.851208	-0.0291	-0.0145606
	194.7	4.55256	5.65718	3.74782	0.999008		4.31876	5.23753	3.49418	0.999348		3.47375	5.0206	2.78185	0.998249		3.5912	4.67985	2.82382	0.99893		0.0568	0.286233	-0.14164	-0.0646321		0.1226	0.62917	-0.07226	-0.0348829		0.049225	0.398583	-0.074275	-0.0388773		0.16465	0.841877	-0.030925	-0.0154737
	195	4.55092	5.65514	3.74618	0.998571		4.31926	5.23813	3.49468	0.999491		3.47417	5.02121	2.78227	0.998401		3.59057	4.67904	2.8232	0.998709		0.05764	0.290466	-0.1408	-0.0642488		0.12358	0.634199	-0.07128	-0.0344098		0.049225	0.398583	-0.074275	-0.0388773		0.164025	0.838681	-0.03155	-0.0157864
	195.3	4.5514	5.65574	3.74666	0.998699		4.31974	5.23872	3.49516	0.999628		3.47355	5.02031	2.78165	0.998177		3.59117	4.67982	2.8238	0.998921		0.05926	0.298629	-0.13918	-0.0635096		0.12374	0.63502	-0.07112	-0.0343326		0.048875	0.395749	-0.074625	-0.0390605		0.164025	0.838681	-0.03155	-0.0157864
	195.6	4.55126	5.65557	3.74652	0.998662		4.31762	5.23614	3.49304	0.999022		3.47518	5.02266	2.78328	0.99876		3.59075	4.67926	2.82337	0.998771		0.0594	0.299335	-0.13904	-0.0634457		0.12372	0.634917	-0.07114	-0.0343423		0.048875	0.395749	-0.074625	-0.0390605		0.16565	0.84699	-0.029925	-0.0149734
	195.9	4.5524	5.65698	3.74766	0.998966		4.3186	5.23733	3.49402	0.999302		3.47455	5.02175	2.78265	0.998536		3.59077	4.6793	2.8234	0.99878		0.06074	0.306087	-0.1377	-0.0628342		0.1242	0.637381	-0.07066	-0.0341105		0.050875	0.411943	-0.072625	-0.0380136		0.164225	0.839703	-0.03135	-0.0156864
	196.2	4.55224	5.65678	3.7475	0.998923		4.3186	5.23733	3.49402	0.999302		3.47455	5.02175	2.78265	0.998536		3.5914	4.68011	2.82402	0.999001		0.0604	0.304374	-0.13804	-0.0629894		0.12388	0.635738	-0.07098	-0.034265		0.0523	0.423482	-0.0712	-0.0372677		0.1691	0.86463	-0.026475	-0.0132471
	196.5	4.5509	5.65512	3.74616	0.998566		4.31858	5.23731	3.494	0.999296		3.47293	5.0194	2.78103	0.997953		3.58993	4.67819	2.82255	0.998479		0.06022	0.303467	-0.13822	-0.0630715		0.12392	0.635944	-0.07094	-0.0342457		0.04945	0.400405	-0.07405	-0.0387595		0.1687	0.862585	-0.026875	-0.0134472
	196.8	4.55172	5.65614	3.74698	0.998784		4.3191	5.23794	3.49452	0.999445		3.47293	5.0194	2.78103	0.997953		3.58997	4.67825	2.8226	0.998497		0.06138	0.309313	-0.13706	-0.0625422		0.12228	0.627527	-0.07258	-0.0350374		0.04925	0.398785	-0.07425	-0.0388642		0.170325	0.870894	-0.02525	-0.0126342
	197.1	4.55074	5.65492	3.746	0.998523		4.31812	5.23675	3.49354	0.999165		3.47458	5.02179	2.78267	0.998545		3.5916	4.68037	2.82423	0.999071		0.05908	0.297722	-0.13936	-0.0635917		0.1213	0.622498	-0.07356	-0.0355105		0.050475	0.408704	-0.073025	-0.038223		0.17155	0.877157	-0.024025	-0.0120212
	197.4	4.55158	5.65596	3.74684	0.998747		4.3178	5.23636	3.49322	0.999073		3.47315	5.01973	2.78125	0.998034		3.58973	4.67793	2.82235	0.998408		0.05892	0.296916	-0.13952	-0.0636647		0.12082	0.620035	-0.07404	-0.0357422		0.0468	0.378947	-0.0767	-0.0401466		0.170125	0.869871	-0.02545	-0.0127342
	197.7	4.5514	5.65574	3.74666	0.998699		4.3178	5.23636	3.49322	0.999073		3.47415	5.02117	2.78225	0.998392		3.59017	4.67851	2.8228	0.998567		0.0604	0.304374	-0.13804	-0.0629894		0.12244	0.628349	-0.07242	-0.0349602		0.048425	0.392105	-0.075075	-0.039296		0.169125	0.864758	-0.02645	-0.0132346
	198	4.55058	5.65472	3.74584	0.998481		4.31842	5.23711	3.49384	0.999251		3.47395	5.02088	2.78205	0.998321		3.59158	4.68034	2.8242	0.999063		0.05794	0.291977	-0.1405	-0.0641119		0.12242	0.628246	-0.07244	-0.0349698		0.050875	0.411943	-0.072625	-0.0380136		0.167675	0.857344	-0.0279	-0.0139601
	198.3	4.55158	5.65596	3.74684	0.998747		4.31826	5.23692	3.49368	0.999205		3.47375	5.0206	2.78185	0.998249		3.59097	4.67956	2.8236	0.99885		0.0578	0.291272	-0.14064	-0.0641758		0.12144	0.623217	-0.07342	-0.0354429		0.0529	0.42834	-0.0706	-0.0369537		0.16645	0.85108	-0.029125	-0.0145731
	198.6	4.55222	5.65676	3.74748	0.998918		4.31954	5.23847	3.49496	0.999571		3.47415	5.02117	2.78225	0.998392		3.59077	4.6793	2.8234	0.99878		0.05876	0.29611	-0.13968	-0.0637377		0.1229	0.630709	-0.07196	-0.0347381		0.053725	0.43502	-0.069775	-0.0365219		0.16665	0.852103	-0.028925	-0.014473
	198.9	4.55208	5.65658	3.74734	0.99888		4.31924	5.23811	3.49466	0.999485		3.47355	5.02031	2.78165	0.998177		3.59117	4.67982	2.8238	0.998921		0.06006	0.302661	-0.13838	-0.0631445		0.1239	0.635841	-0.07096	-0.0342554		0.0537	0.434818	-0.0698	-0.0365349		0.16685	0.853125	-0.028725	-0.0143729
	199.2	4.55074	5.65492	3.746	0.998523		4.3189	5.2377	3.49432	0.999388		3.47332	5.01998	2.78143	0.998096		3.59138	4.68008	2.824	0.998992		0.0609	0.306894	-0.13754	-0.0627612		0.12504	0.641691	-0.06982	-0.033705		0.053725	0.43502	-0.069775	-0.0365219		0.167075	0.854276	-0.0285	-0.0142603
	199.5	4.55106	5.65532	3.74632	0.998609		4.31778	5.23634	3.4932	0.999068		3.47392	5.02085	2.78202	0.998312		3.59138	4.68008	2.824	0.998992		0.0591	0.297823	-0.13934	-0.0635826		0.12424	0.637586	-0.07062	-0.0340912		0.056575	0.458097	-0.066925	-0.0350301		0.1693	0.865653	-0.026275	-0.013147
	199.8	4.5506	5.65475	3.74586	0.998486		4.31846	5.23716	3.49388	0.999262		3.47415	5.02117	2.78225	0.998392		3.59097	4.67956	2.8236	0.99885		0.05876	0.29611	-0.13968	-0.0637377		0.12358	0.634199	-0.07128	-0.0344098		0.056575	0.458097	-0.066925	-0.0350301		0.1673	0.855426	-0.028275	-0.0141478
	200.1	4.54848	5.65211	3.74374	0.997921		4.31828	5.23694	3.4937	0.999211		3.47375	5.0206	2.78185	0.998249		3.58975	4.67796	2.82238	0.998417		0.056	0.282201	-0.14244	-0.0649972		0.12258	0.629067	-0.07228	-0.0348926		0.05675	0.459514	-0.06675	-0.0349385		0.166275	0.850185	-0.0293	-0.0146606
	200.4	4.55108	5.65534	3.74634	0.998614		4.31844	5.23714	3.49386	0.999256		3.47415	5.02117	2.78225	0.998392		3.59158	4.68034	2.8242	0.999063		0.05746	0.289559	-0.14098	-0.064331		0.12276	0.629991	-0.0721	-0.0348057		0.05435	0.440081	-0.06915	-0.0361947		0.1675	0.856449	-0.028075	-0.0140477
	200.7	4.5506	5.65475	3.74586	0.998486		4.31794	5.23653	3.49336	0.999113		3.47253	5.01882	2.78063	0.997809		3.59055	4.679	2.82317	0.9987		0.0555	0.279682	-0.14294	-0.0652253		0.12342	0.633378	-0.07144	-0.0344871		0.0513	0.415385	-0.0722	-0.0377912		0.165875	0.84814	-0.0297	-0.0148608
	201	4.55208	5.65658	3.74734	0.99888		4.31778	5.23634	3.4932	0.999068		3.47233	5.01854	2.78043	0.997737		3.59138	4.68008	2.824	0.998992		0.05664	0.285426	-0.1418	-0.0647051		0.12294	0.630915	-0.07192	-0.0347188		0.050475	0.408704	-0.073025	-0.038223		0.16625	0.850058	-0.029325	-0.0146731
	201.3	4.55188	5.65634	3.74714	0.998827		4.31778	5.23634	3.4932	0.999068		3.47255	5.01886	2.78065	0.997818		3.5924	4.68141	2.82503	0.999354		0.05518	0.278069	-0.14326	-0.0653713		0.12242	0.628246	-0.07244	-0.0349698		0.050875	0.411943	-0.072625	-0.0380136		0.16625	0.850058	-0.029325	-0.0146731
	201.6	4.55142	5.65576	3.74668	0.998705		4.3178	5.23636	3.49322	0.999073		3.4719	5.01792	2.78	0.997585		3.59077	4.6793	2.8234	0.99878		0.05584	0.281395	-0.1426	-0.0650702		0.12128	0.622396	-0.07358	-0.0355202		0.049675	0.402227	-0.073825	-0.0386417		0.167675	0.857344	-0.0279	-0.0139601
	201.9	4.55238	5.65696	3.74764	0.99896		4.31812	5.23675	3.49354	0.999165		3.47233	5.01854	2.78043	0.997737		3.5912	4.67985	2.82382	0.99893		0.05746	0.289559	-0.14098	-0.064331		0.11984	0.615006	-0.07502	-0.0362153		0.0513	0.415385	-0.0722	-0.0377912		0.17075	0.873067	-0.024825	-0.0124215
	202.2	4.5514	5.65574	3.74666	0.998699		4.31746	5.23595	3.49288	0.998976		3.47335	5.02002	2.78145	0.998105		3.5912	4.67985	2.82382	0.99893		0.05892	0.296916	-0.13952	-0.0636647		0.11932	0.612337	-0.07554	-0.0364663		0.052325	0.423684	-0.071175	-0.0372546		0.17035	0.871021	-0.025225	-0.0126217
	202.5	4.5501	5.65412	3.74536	0.998353		4.31746	5.23595	3.49288	0.998976		3.47255	5.01886	2.78065	0.997818		3.59035	4.67874	2.82298	0.998629		0.0591	0.297823	-0.13934	-0.0635826		0.12046	0.618187	-0.0744	-0.035916		0.0505	0.408907	-0.073	-0.0382099		0.168925	0.863735	-0.02665	-0.0133347
	202.8	4.55024	5.6543	3.7455	0.99839		4.3173	5.23576	3.49272	0.99893		3.47293	5.0194	2.78103	0.997953		3.59015	4.67848	2.82278	0.998558		0.06042	0.304475	-0.13802	-0.0629803		0.1203	0.617366	-0.07456	-0.0359932		0.051675	0.418421	-0.071825	-0.0375949		0.168475	0.861434	-0.0271	-0.0135598
	203.1	4.5501	5.65412	3.74536	0.998353		4.3168	5.23515	3.49222	0.998787		3.47375	5.0206	2.78185	0.998249		3.59097	4.67956	2.8236	0.99885		0.05924	0.298529	-0.1392	-0.0635187		0.11916	0.611516	-0.0757	-0.0365436		0.051675	0.418421	-0.071825	-0.0375949		0.1679	0.858494	-0.027675	-0.0138475
	203.4	4.5496	5.6535	3.74486	0.998219		4.3181	5.23673	3.49352	0.999159		3.47335	5.02002	2.78145	0.998105		3.59057	4.67904	2.8232	0.998709		0.05924	0.298529	-0.1392	-0.0635187		0.11934	0.61244	-0.07552	-0.0364567		0.050675	0.410324	-0.072825	-0.0381183		0.168675	0.862457	-0.0269	-0.0134598
	203.7	4.55042	5.65452	3.74568	0.998438		4.31714	5.23556	3.49256	0.998885		3.47435	5.02146	2.78245	0.998464		3.59138	4.68008	2.824	0.998992		0.06022	0.303467	-0.13822	-0.0630715		0.11886	0.609976	-0.076	-0.0366884		0.0521	0.421862	-0.0714	-0.0373724		0.1683	0.860539	-0.027275	-0.0136474
	204	4.5501	5.65412	3.74536	0.998353		4.31666	5.23498	3.49208	0.998747		3.47415	5.02117	2.78225	0.998392		3.58995	4.67822	2.82258	0.998488		0.05912	0.297924	-0.13932	-0.0635735		0.11706	0.600739	-0.0778	-0.0375573		0.0513	0.415385	-0.0722	-0.0377912		0.16565	0.84699	-0.029925	-0.0149734
	204.3	4.55024	5.6543	3.7455	0.99839		4.31648	5.23476	3.4919	0.998696		3.47337	5.02005	2.78147	0.998114		3.58995	4.67822	2.82258	0.998488		0.05846	0.294598	-0.13998	-0.0638746		0.11754	0.603202	-0.07732	-0.0373256		0.04965	0.402024	-0.07385	-0.0386548		0.168475	0.861434	-0.0271	-0.0135598
	204.6	4.54914	5.65293	3.7444	0.998097		4.31648	5.23476	3.4919	0.998696		3.47417	5.02121	2.78227	0.998401		3.58975	4.67796	2.82238	0.998417		0.05666	0.285527	-0.14178	-0.064696		0.11902	0.610797	-0.07584	-0.0366112		0.04965	0.402024	-0.07385	-0.0386548		0.1685	0.861562	-0.027075	-0.0135473
	204.9	4.54976	5.6537	3.74502	0.998262		4.31762	5.23614	3.49304	0.999022		3.47273	5.01911	2.78083	0.997881		3.59015	4.67848	2.82278	0.998558		0.05942	0.299436	-0.13902	-0.0634366		0.1205	0.618393	-0.07436	-0.0358967		0.04865	0.393927	-0.07485	-0.0391782		0.1679	0.858494	-0.027675	-0.0138475
	205.2	4.54894	5.65268	3.7442	0.998043		4.31778	5.23634	3.4932	0.999068		3.47352	5.02027	2.78163	0.998168		3.58995	4.67822	2.82258	0.998488		0.05878	0.29621	-0.13966	-0.0637286		0.12128	0.622396	-0.07358	-0.0355202		0.047625	0.385628	-0.075875	-0.0397147		0.16955	0.866931	-0.026025	-0.0130219
	205.5	4.54978	5.65373	3.74504	0.998267		4.31684	5.2352	3.49226	0.998799		3.47273	5.01911	2.78083	0.997881		3.58955	4.6777	2.82218	0.998346		0.0612	0.308406	-0.13724	-0.0626243		0.12064	0.619111	-0.07422	-0.0358291		0.048225	0.390486	-0.075275	-0.0394007		0.17135	0.876134	-0.024225	-0.0121213
	205.8	4.54832	5.65191	3.74358	0.997878		4.31616	5.23437	3.49158	0.998604		3.47295	5.01944	2.78105	0.997962		3.58855	4.6764	2.82118	0.997992		0.06122	0.308506	-0.13722	-0.0626152		0.12112	0.621574	-0.07374	-0.0355974		0.04985	0.403644	-0.07365	-0.0385501		0.17135	0.876134	-0.024225	-0.0121213
	206.1	4.55076	5.65494	3.74602	0.998529		4.31682	5.23517	3.49224	0.998793		3.47395	5.02088	2.78205	0.998321		3.58975	4.67796	2.82238	0.998417		0.06382	0.321609	-0.13462	-0.0614288		0.1211	0.621472	-0.07376	-0.035607		0.051475	0.416802	-0.072025	-0.0376996		0.17215	0.880225	-0.023425	-0.011721
	206.4	4.54928	5.65311	3.74454	0.998134		4.31714	5.23556	3.49256	0.998885		3.47293	5.0194	2.78103	0.997953		3.58975	4.67796	2.82238	0.998417		0.0614	0.309413	-0.13704	-0.0625331		0.12032	0.617469	-0.07454	-0.0359836		0.052475	0.424899	-0.071025	-0.0371761		0.17195	0.879202	-0.023625	-0.0118211
	206.7	4.5501	5.65412	3.74536	0.998353		4.31586	5.23401	3.49128	0.998519		3.47295	5.01944	2.78105	0.997962		3.59075	4.67926	2.82337	0.998771		0.05894	0.297017	-0.1395	-0.0636556		0.1213	0.622498	-0.07356	-0.0355105		0.051475	0.416802	-0.072025	-0.0376996		0.171975	0.87933	-0.0236	-0.0118086
	207	4.54962	5.65353	3.74488	0.998225		4.31616	5.23437	3.49158	0.998604		3.47255	5.01886	2.78065	0.997818		3.59035	4.67874	2.82298	0.998629		0.05696	0.287039	-0.14148	-0.0645591		0.1231	0.631736	-0.07176	-0.0346416		0.05005	0.405263	-0.07345	-0.0384454		0.169925	0.868848	-0.02565	-0.0128343
	207.3	4.54962	5.65353	3.74488	0.998225		4.31664	5.23496	3.49206	0.998742		3.47315	5.01973	2.78125	0.998034		3.58975	4.67796	2.82238	0.998417		0.0565	0.284721	-0.14194	-0.064769		0.12242	0.628246	-0.07244	-0.0349698		0.0521	0.421862	-0.0714	-0.0373724		0.17155	0.877157	-0.024025	-0.0120212
	207.6	4.55252	5.65713	3.74778	0.998998		4.31648	5.23476	3.4919	0.998696		3.47273	5.01911	2.78083	0.997881		3.58933	4.67741	2.82195	0.998267		0.05956	0.300141	-0.13888	-0.0633727		0.11902	0.610797	-0.07584	-0.0366112		0.0519	0.420243	-0.0716	-0.0374771		0.172175	0.880353	-0.0234	-0.0117085
	207.9	4.54912	5.65291	3.74438	0.998091		4.31712	5.23554	3.49254	0.998879		3.47375	5.0206	2.78185	0.998249		3.58975	4.67796	2.82238	0.998417		0.05778	0.291171	-0.14066	-0.0641849		0.12162	0.62414	-0.07324	-0.035356		0.0529	0.42834	-0.0706	-0.0369537		0.1742	0.890707	-0.021375	-0.0106953
	208.2	4.55026	5.65432	3.74552	0.998395		4.31666	5.23498	3.49208	0.998747		3.47233	5.01854	2.78043	0.997737		3.58893	4.67689	2.82155	0.998125		0.05892	0.296916	-0.13952	-0.0636647		0.12262	0.629272	-0.07224	-0.0348733		0.04965	0.402024	-0.07385	-0.0386548		0.173975	0.889556	-0.0216	-0.0108078
	208.5	4.54848	5.65211	3.74374	0.997921		4.31696	5.23534	3.49238	0.998833		3.4729	5.01937	2.781	0.997944		3.58993	4.67819	2.82255	0.998479		0.05894	0.297017	-0.1395	-0.0636556		0.1224	0.628143	-0.07246	-0.0349795		0.050275	0.407085	-0.073225	-0.0383277		0.175225	0.895948	-0.02035	-0.0101824
	208.8	4.54978	5.65373	3.74504	0.998267		4.31648	5.23476	3.4919	0.998696		3.47315	5.01973	2.78125	0.998034		3.58973	4.67793	2.82235	0.998408		0.06054	0.30508	-0.1379	-0.0629255		0.11966	0.614082	-0.0752	-0.0363022		0.051075	0.413563	-0.072425	-0.0379089		0.175	0.894797	-0.020575	-0.010295
	209.1	4.54798	5.65149	3.74324	0.997788		4.31616	5.23437	3.49158	0.998604		3.47173	5.01767	2.77983	0.997522		3.58973	4.67793	2.82235	0.998408		0.05924	0.298529	-0.1392	-0.0635187		0.11984	0.615006	-0.07502	-0.0362153		0.050275	0.407085	-0.073225	-0.0383277		0.176225	0.901061	-0.01935	-0.00968202
	209.4	4.54864	5.65231	3.7439	0.997964		4.3168	5.23515	3.49222	0.998787		3.47253	5.01882	2.78063	0.997809		3.58933	4.67741	2.82195	0.998267		0.05992	0.301955	-0.13852	-0.0632084		0.12194	0.625783	-0.07292	-0.0352015		0.0521	0.421862	-0.0714	-0.0373724		0.17665	0.903234	-0.018925	-0.00946937
	209.7	4.54896	5.65271	3.74422	0.998049		4.31516	5.23316	3.49058	0.998318		3.47235	5.01857	2.78045	0.997746		3.58873	4.67662	2.82135	0.998054		0.05958	0.300242	-0.13886	-0.0633636		0.12176	0.624859	-0.0731	-0.0352884		0.0521	0.421862	-0.0714	-0.0373724		0.175	0.894797	-0.020575	-0.010295
	210	4.5488	5.65251	3.74406	0.998006		4.31566	5.23377	3.49108	0.998461		3.47253	5.01882	2.78063	0.997809		3.58752	4.67506	2.82015	0.99763		0.06022	0.303467	-0.13822	-0.0630715		0.1213	0.622498	-0.07356	-0.0355105		0.051275	0.415182	-0.072225	-0.0378042		0.174975	0.89467	-0.0206	-0.0103075
	210.3	4.54814	5.65169	3.7434	0.99783		4.31696	5.23534	3.49238	0.998833		3.47293	5.0194	2.78103	0.997953		3.5887	4.67659	2.82132	0.998046		0.0599	0.301854	-0.13854	-0.0632176		0.1213	0.622498	-0.07356	-0.0355105		0.0513	0.415385	-0.0722	-0.0377912		0.176225	0.901061	-0.01935	-0.00968202
	210.6	4.54896	5.65271	3.74422	0.998049		4.31648	5.23476	3.4919	0.998696		3.47233	5.01854	2.78043	0.997737		3.58953	4.67767	2.82215	0.998337		0.05864	0.295505	-0.1398	-0.0637925		0.11986	0.615108	-0.075	-0.0362056		0.04885	0.395547	-0.07465	-0.0390735		0.17625	0.901189	-0.019325	-0.00966951
	210.9	4.54962	5.65353	3.74488	0.998225		4.31714	5.23556	3.49256	0.998885		3.47153	5.01738	2.77962	0.99745		3.58893	4.67689	2.82155	0.998125		0.05746	0.289559	-0.14098	-0.064331		0.12048	0.61829	-0.07438	-0.0359063		0.047	0.380567	-0.0765	-0.0400419		0.173375	0.886489	-0.0222	-0.0111081
	211.2	4.54912	5.65291	3.74438	0.998091		4.31632	5.23457	3.49174	0.99865		3.47087	5.01644	2.77897	0.997217		3.58955	4.6777	2.82218	0.998346		0.05666	0.285527	-0.14178	-0.064696		0.12016	0.616648	-0.0747	-0.0360608		0.0466	0.377328	-0.0769	-0.0402512		0.171375	0.876262	-0.0242	-0.0121088
	211.5	4.55058	5.65472	3.74584	0.998481		4.31666	5.23498	3.49208	0.998747		3.47173	5.01767	2.77983	0.997522		3.58873	4.67662	2.82135	0.998054		0.05568	0.280589	-0.14276	-0.0651432		0.11998	0.615724	-0.07488	-0.0361477		0.0478	0.387045	-0.0757	-0.0396231		0.17035	0.871021	-0.025225	-0.0126217
	211.8	4.54976	5.6537	3.74502	0.998262		4.31568	5.23379	3.4911	0.998467		3.47087	5.01644	2.77897	0.997217		3.58873	4.67662	2.82135	0.998054		0.05484	0.276356	-0.1436	-0.0655265		0.12046	0.618187	-0.0744	-0.035916		0.047625	0.385628	-0.075875	-0.0397147		0.170525	0.871916	-0.02505	-0.0125341
	212.1	4.54928	5.65311	3.74454	0.998134		4.31598	5.23416	3.4914	0.998553		3.47233	5.01854	2.78043	0.997737		3.58833	4.6761	2.82095	0.997913		0.05438	0.274037	-0.14406	-0.0657364		0.1195	0.613261	-0.07536	-0.0363794		0.048225	0.390486	-0.075275	-0.0394007		0.169925	0.868848	-0.02565	-0.0128343
	212.4	4.5488	5.65251	3.74406	0.998006		4.31566	5.23377	3.49108	0.998461		3.4709	5.01648	2.779	0.997226		3.5879	4.67555	2.82052	0.997763		0.05472	0.275751	-0.14372	-0.0655813		0.11886	0.609976	-0.076	-0.0366884		0.050475	0.408704	-0.073025	-0.038223		0.169125	0.864758	-0.02645	-0.0132346
	212.7	4.54878	5.65248	3.74404	0.998001		4.31532	5.23336	3.49074	0.998364		3.47235	5.01857	2.78045	0.997746		3.5883	4.67607	2.82092	0.997904		0.0547	0.27565	-0.14374	-0.0655904		0.1192	0.611721	-0.07566	-0.0365243		0.0515	0.417004	-0.072	-0.0376865		0.170325	0.870894	-0.02525	-0.0126342
	213	4.54798	5.65149	3.74324	0.997788		4.31534	5.23338	3.49076	0.99837		3.47213	5.01825	2.78023	0.997666		3.58853	4.67636	2.82115	0.997984		0.05454	0.274844	-0.1439	-0.0656634		0.1205	0.618393	-0.07436	-0.0358967		0.050475	0.408704	-0.073025	-0.038223		0.170325	0.870894	-0.02525	-0.0126342
	213.3	4.54878	5.65248	3.74404	0.998001		4.31516	5.23316	3.49058	0.998318		3.47147	5.01731	2.77957	0.997432		3.58913	4.67715	2.82175	0.998196		0.05534	0.278875	-0.1431	-0.0652983		0.12098	0.620856	-0.07388	-0.035665		0.0509	0.412146	-0.0726	-0.0380005		0.17115	0.875112	-0.024425	-0.0122214
	213.6	4.5488	5.65251	3.74406	0.998006		4.31502	5.23299	3.49044	0.998278		3.4715	5.01734	2.7796	0.997441		3.58853	4.67636	2.82115	0.997984		0.05438	0.274037	-0.14406	-0.0657364		0.1231	0.631736	-0.07176	-0.0346416		0.05105	0.41336	-0.07245	-0.037922		0.168725	0.862713	-0.02685	-0.0134347
	213.9	4.54846	5.65209	3.74372	0.997916		4.31486	5.2328	3.49028	0.998232		3.4709	5.01648	2.779	0.997226		3.58853	4.67636	2.82115	0.997984		0.05308	0.267486	-0.14536	-0.0663296		0.12308	0.631633	-0.07178	-0.0346512		0.050675	0.410324	-0.072825	-0.0381183		0.1691	0.86463	-0.026475	-0.0132471
	214.2	4.54944	5.6533	3.7447	0.998177		4.31502	5.23299	3.49044	0.998278		3.47173	5.01767	2.77983	0.997522		3.5865	4.67373	2.81913	0.997267		0.05326	0.268393	-0.14518	-0.0662475		0.12422	0.637483	-0.07064	-0.0341009		0.053525	0.433401	-0.069975	-0.0366265		0.16645	0.85108	-0.029125	-0.0145731
	214.5	4.54604	5.64908	3.7413	0.99727		4.31536	5.2334	3.49078	0.998375		3.47233	5.01854	2.78043	0.997737		3.58933	4.67741	2.82195	0.998267		0.05112	0.257609	-0.14732	-0.067224		0.12356	0.634096	-0.0713	-0.0344195		0.0531	0.42996	-0.0704	-0.036849		0.17095	0.874089	-0.024625	-0.0123214
	214.8	4.54798	5.65149	3.74324	0.997788		4.31454	5.23241	3.48996	0.998141		3.47332	5.01998	2.78143	0.998096		3.58893	4.67689	2.82155	0.998125		0.05404	0.272324	-0.1444	-0.0658915		0.12276	0.629991	-0.0721	-0.0348057		0.0523	0.423482	-0.0712	-0.0372677		0.17215	0.880225	-0.023425	-0.011721
	215.1	4.54864	5.65231	3.7439	0.997964		4.31486	5.2328	3.49028	0.998232		3.47087	5.01644	2.77897	0.997217		3.58853	4.67636	2.82115	0.997984		0.05634	0.283915	-0.1421	-0.064842		0.12294	0.630915	-0.07192	-0.0347188		0.051275	0.415182	-0.072225	-0.0378042		0.172375	0.881375	-0.0232	-0.0116084
	215.4	4.54718	5.6505	3.74244	0.997574		4.31388	5.23161	3.4893	0.997952		3.4711	5.01677	2.7792	0.997298		3.58835	4.67614	2.82097	0.997922		0.05614	0.282907	-0.1423	-0.0649333		0.12212	0.626706	-0.07274	-0.0351147		0.0517	0.418623	-0.0718	-0.0375818		0.174225	0.890835	-0.02135	-0.0106827
	215.7	4.54768	5.65112	3.74294	0.997708		4.3142	5.232	3.48962	0.998044		3.47173	5.01767	2.77983	0.997522		3.5871	4.67451	2.81973	0.99748		0.05682	0.286333	-0.14162	-0.064623		0.12048	0.61829	-0.07438	-0.0359063		0.053125	0.430162	-0.070375	-0.0368359		0.172375	0.881375	-0.0232	-0.0116084
	216	4.54964	5.65355	3.7449	0.99823		4.31404	5.2318	3.48946	0.997998		3.4709	5.01648	2.779	0.997226		3.5863	4.67346	2.81893	0.997197		0.05878	0.29621	-0.13966	-0.0637286		0.11902	0.610797	-0.07584	-0.0366112		0.0515	0.417004	-0.072	-0.0376865		0.16955	0.866931	-0.026025	-0.0130219
	216.3	4.54848	5.65211	3.74374	0.997921		4.3139	5.23163	3.48932	0.997958		3.47127	5.01702	2.77937	0.997361		3.58628	4.67343	2.8189	0.997188		0.05878	0.29621	-0.13966	-0.0637286		0.12016	0.616648	-0.0747	-0.0360608		0.051275	0.415182	-0.072225	-0.0378042		0.17075	0.873067	-0.024825	-0.0124215
	216.6	4.5475	5.65089	3.74276	0.99766		4.31356	5.23122	3.48898	0.997861		3.4713	5.01705	2.7794	0.99737		3.58648	4.67369	2.8191	0.997258		0.05858	0.295203	-0.13986	-0.0638199		0.1216	0.624038	-0.07326	-0.0353657		0.0511	0.413765	-0.0724	-0.0378958		0.170125	0.869871	-0.02545	-0.0127342
	216.9	4.54818	5.65174	3.74344	0.997841		4.31404	5.2318	3.48946	0.997998		3.4711	5.01677	2.7792	0.997298		3.5873	4.67477	2.81993	0.99755		0.05764	0.290466	-0.1408	-0.0642488		0.12274	0.629888	-0.07212	-0.0348154		0.04945	0.400405	-0.07405	-0.0387595		0.1695	0.866675	-0.026075	-0.013047
	217.2	4.54766	5.65109	3.74292	0.997702		4.31372	5.23141	3.48914	0.997906		3.4707	5.01619	2.7788	0.997154		3.5869	4.67425	2.81953	0.997409		0.0578	0.291272	-0.14064	-0.0641758		0.12326	0.632557	-0.0716	-0.0345643		0.04925	0.398785	-0.07425	-0.0388642		0.1683	0.860539	-0.027275	-0.0136474
	217.5	4.54752	5.65092	3.74278	0.997665		4.31452	5.23238	3.48994	0.998135		3.46865	5.01322	2.77675	0.996419		3.58628	4.67343	2.8189	0.997188		0.0578	0.291272	-0.14064	-0.0641758		0.12374	0.63502	-0.07112	-0.0343326		0.047425	0.384008	-0.076075	-0.0398194		0.167675	0.857344	-0.0279	-0.0139601
	217.8	4.54802	5.65154	3.74328	0.997798		4.31454	5.23241	3.48996	0.998141		3.47027	5.01557	2.77838	0.997002		3.5879	4.67555	2.82052	0.997763		0.05732	0.288853	-0.14112	-0.0643948		0.1234	0.633275	-0.07146	-0.0344967		0.049275	0.398988	-0.074225	-0.0388511		0.166875	0.853253	-0.0287	-0.0143604
	218.1	4.5459	5.64891	3.74116	0.997233		4.31452	5.23238	3.48994	0.998135		3.47127	5.01702	2.77937	0.997361		3.58548	4.67239	2.8181	0.996905		0.05584	0.281395	-0.1426	-0.0650702		0.12112	0.621574	-0.07374	-0.0355974		0.04865	0.393927	-0.07485	-0.0391782		0.165275	0.845072	-0.0303	-0.015161
	218.4	4.54914	5.65293	3.7444	0.998097		4.3147	5.2326	3.49012	0.998187		3.4707	5.01619	2.7788	0.997154		3.5875	4.67503	2.82012	0.997621		0.05912	0.297924	-0.13932	-0.0635735		0.12242	0.628246	-0.07244	-0.0349698		0.04965	0.402024	-0.07385	-0.0386548		0.1685	0.861562	-0.027075	-0.0135473
	218.7	4.5475	5.65089	3.74276	0.99766		4.31436	5.23219	3.48978	0.998089		3.4717	5.01763	2.7798	0.997513		3.5879	4.67555	2.82052	0.997763		0.0591	0.297823	-0.13934	-0.0635826		0.12192	0.62568	-0.07294	-0.0352112		0.049675	0.402227	-0.073825	-0.0386417		0.169725	0.867826	-0.02585	-0.0129344
	219	4.54586	5.64886	3.74112	0.997222		4.31454	5.23241	3.48996	0.998141		3.4717	5.01763	2.7798	0.997513		3.58812	4.67584	2.82075	0.997842		0.05732	0.288853	-0.14112	-0.0643948		0.12146	0.623319	-0.0734	-0.0354333		0.0505	0.408907	-0.073	-0.0382099		0.169925	0.868848	-0.02565	-0.0128343
	219.3	4.54684	5.65007	3.7421	0.997484		4.31452	5.23238	3.48994	0.998135		3.4717	5.01763	2.7798	0.997513		3.5875	4.67503	2.82012	0.997621		0.0573	0.288752	-0.14114	-0.064404		0.12256	0.628964	-0.0723	-0.0349022		0.04985	0.403644	-0.07365	-0.0385501		0.17055	0.872044	-0.025025	-0.0125216
	219.6	4.5472	5.65052	3.74246	0.99758		4.31436	5.23219	3.48978	0.998089		3.47193	5.01796	2.78003	0.997594		3.58812	4.67584	2.82075	0.997842		0.05698	0.28714	-0.14146	-0.06455		0.12292	0.630812	-0.07194	-0.0347285		0.0525	0.425101	-0.071	-0.037163		0.17075	0.873067	-0.024825	-0.0124215
	219.9	4.54718	5.6505	3.74244	0.997574		4.31436	5.23219	3.48978	0.998089		3.47253	5.01882	2.78063	0.997809		3.58608	4.67317	2.8187	0.997117		0.05712	0.287845	-0.14132	-0.0644861		0.12292	0.630812	-0.07194	-0.0347285		0.05395	0.436842	-0.06955	-0.0364041		0.172375	0.881375	-0.0232	-0.0116084
	220.2	4.54766	5.65109	3.74292	0.997702		4.31338	5.231	3.4888	0.997809		3.47193	5.01796	2.78003	0.997594		3.5867	4.67399	2.81933	0.997338		0.05778	0.291171	-0.14066	-0.0641849		0.12292	0.630812	-0.07194	-0.0347285		0.053725	0.43502	-0.069775	-0.0365219		0.175025	0.894925	-0.02055	-0.0102825
	220.5	4.54668	5.64987	3.74194	0.997441		4.31452	5.23238	3.48994	0.998135		3.47355	5.02031	2.78165	0.998177		3.58688	4.67421	2.8195	0.9974		0.05796	0.292078	-0.14048	-0.0641028		0.12094	0.620651	-0.07392	-0.0356843		0.05535	0.448178	-0.06815	-0.0356713		0.174175	0.890579	-0.0214	-0.0107078
	220.8	4.54622	5.6493	3.74148	0.997318		4.31372	5.23141	3.48914	0.997906		3.47112	5.0168	2.77922	0.997307		3.5873	4.67477	2.81993	0.99755		0.05826	0.29359	-0.14018	-0.0639659		0.12146	0.623319	-0.0734	-0.0354333		0.053325	0.431781	-0.070175	-0.0367312		0.1744	0.89173	-0.021175	-0.0105952
	221.1	4.54766	5.65109	3.74292	0.997702		4.31306	5.23061	3.48848	0.997718		3.47067	5.01615	2.77877	0.997145		3.5873	4.67477	2.81993	0.99755		0.05746	0.289559	-0.14098	-0.064331		0.12196	0.625885	-0.0729	-0.0351919		0.0521	0.421862	-0.0714	-0.0373724		0.176025	0.900038	-0.01955	-0.00978209
	221.4	4.54554	5.64846	3.7408	0.997137		4.31338	5.231	3.4888	0.997809		3.4709	5.01648	2.779	0.997226		3.58752	4.67506	2.82015	0.99763		0.05454	0.274844	-0.1439	-0.0656634		0.12226	0.627425	-0.0726	-0.0350471		0.0525	0.425101	-0.071	-0.037163		0.175025	0.894925	-0.02055	-0.0102825
	221.7	4.54848	5.65211	3.74374	0.997921		4.31372	5.23141	3.48914	0.997906		3.46988	5.01499	2.77798	0.996858		3.58648	4.67369	2.8191	0.997258		0.05404	0.272324	-0.1444	-0.0658915		0.12114	0.621677	-0.07372	-0.0355877		0.051275	0.415182	-0.072225	-0.0378042		0.174	0.889684	-0.021575	-0.0107953
	222	4.5452	5.64804	3.74046	0.997047		4.3142	5.232	3.48962	0.998044		3.47047	5.01586	2.77858	0.997074		3.58688	4.67421	2.8195	0.9974		0.05094	0.256702	-0.1475	-0.0673061		0.1239	0.635841	-0.07096	-0.0342554		0.051275	0.415182	-0.072225	-0.0378042		0.174775	0.893647	-0.0208	-0.0104075
	222.3	4.54602	5.64905	3.74128	0.997265		4.31388	5.23161	3.4893	0.997952		3.47047	5.01586	2.77858	0.997074		3.58668	4.67395	2.8193	0.997329		0.05062	0.25509	-0.14782	-0.0674521		0.12438	0.638304	-0.07048	-0.0340237		0.048625	0.393725	-0.074875	-0.0391913		0.172975	0.884443	-0.0226	-0.0113082
	222.6	4.5457	5.64866	3.74096	0.99718		4.3134	5.23103	3.48882	0.997815		3.47027	5.01557	2.77838	0.997002		3.58568	4.67265	2.8183	0.996975		0.05062	0.25509	-0.14782	-0.0674521		0.12456	0.639228	-0.0703	-0.0339368		0.04905	0.397166	-0.07445	-0.0389689		0.17115	0.875112	-0.024425	-0.0122214
	222.9	4.54618	5.64925	3.74144	0.997308		4.31358	5.23124	3.489	0.997866		3.46945	5.01438	2.77755	0.996706		3.58585	4.67288	2.81847	0.997037		0.05142	0.259121	-0.14702	-0.0670871		0.12504	0.641691	-0.06982	-0.033705		0.04945	0.400405	-0.07405	-0.0387595		0.170325	0.870894	-0.02525	-0.0126342
	223.2	4.54604	5.64908	3.7413	0.99727		4.31242	5.22984	3.48784	0.997535		3.46948	5.01442	2.77758	0.996715		3.58545	4.67236	2.81807	0.996896		0.05014	0.252671	-0.1483	-0.0676712		0.12586	0.6459	-0.069	-0.0333092		0.0521	0.421862	-0.0714	-0.0373724		0.1703	0.870766	-0.025275	-0.0126467
	223.5	4.54636	5.64948	3.74162	0.997356		4.31256	5.23001	3.48798	0.997575		3.46928	5.01413	2.77738	0.996643		3.58585	4.67288	2.81847	0.997037		0.04916	0.247732	-0.14928	-0.0681183		0.1265	0.649184	-0.06836	-0.0330002		0.050875	0.411943	-0.072625	-0.0380136		0.17195	0.879202	-0.023625	-0.0118211
	223.8	4.5459	5.64891	3.74116	0.997233		4.3129	5.23042	3.48832	0.997672		3.4709	5.01648	2.779	0.997226		3.58648	4.67369	2.8191	0.997258		0.04836	0.243701	-0.15008	-0.0684834		0.12764	0.655034	-0.06722	-0.0324499		0.04965	0.402024	-0.07385	-0.0386548		0.174	0.889684	-0.021575	-0.0107953
	224.1	4.54586	5.64886	3.74112	0.997222		4.31176	5.22904	3.48718	0.997346		3.46845	5.01294	2.77655	0.996347		3.58588	4.67291	2.8185	0.997046		0.04948	0.249345	-0.14896	-0.0679723		0.12762	0.654932	-0.06724	-0.0324596		0.04845	0.392308	-0.07505	-0.0392829		0.173575	0.887511	-0.022	-0.011008
	224.4	4.54604	5.64908	3.7413	0.99727		4.31274	5.23023	3.48816	0.997626		3.47027	5.01557	2.77838	0.997002		3.58565	4.67262	2.81827	0.996967		0.05048	0.254384	-0.14796	-0.067516		0.12712	0.652366	-0.06774	-0.0327009		0.0529	0.42834	-0.0706	-0.0369537		0.175025	0.894925	-0.02055	-0.0102825
	224.7	4.54356	5.646	3.73882	0.996609		4.3124	5.22981	3.48782	0.997529		3.47008	5.01528	2.77818	0.99693		3.58548	4.67239	2.8181	0.996905		0.049	0.246926	-0.14944	-0.0681914		0.12586	0.6459	-0.069	-0.0333092		0.052525	0.425304	-0.070975	-0.03715		0.17685	0.904257	-0.018725	-0.00936929
	225	4.5452	5.64804	3.74046	0.997047		4.31292	5.23044	3.48834	0.997678		3.46948	5.01442	2.77758	0.996715		3.58507	4.67187	2.8177	0.996763		0.0508	0.255997	-0.14764	-0.06737		0.12682	0.650826	-0.06804	-0.0328458		0.05535	0.448178	-0.06815	-0.0356713		0.176425	0.902084	-0.01915	-0.00958195
	225.3	4.54538	5.64826	3.74064	0.997095		4.31322	5.23081	3.48864	0.997763		3.46885	5.01351	2.77695	0.996491		3.58568	4.67265	2.8183	0.996975		0.05324	0.268293	-0.1452	-0.0662566		0.12536	0.643334	-0.0695	-0.0335506		0.05655	0.457895	-0.06695	-0.0350432		0.176025	0.900038	-0.01955	-0.00978209
	225.6	4.54472	5.64744	3.73998	0.996919		4.31306	5.23061	3.48848	0.997718		3.46945	5.01438	2.77755	0.996706		3.58568	4.67265	2.8183	0.996975		0.05436	0.273937	-0.14408	-0.0657455		0.1247	0.639947	-0.07016	-0.0338692		0.0574	0.464777	-0.0661	-0.0345983		0.175225	0.895948	-0.02035	-0.0101824
	225.9	4.54666	5.64985	3.74192	0.997436		4.31308	5.23064	3.4885	0.997723		3.46825	5.01265	2.77635	0.996275		3.58487	4.67161	2.8175	0.996692		0.05326	0.268393	-0.14518	-0.0662475		0.12422	0.637483	-0.07064	-0.0341009		0.056975	0.461336	-0.066525	-0.0348207		0.1742	0.890707	-0.021375	-0.0106953
	226.2	4.54734	5.65069	3.7426	0.997617		4.31226	5.22964	3.48768	0.997489		3.46948	5.01442	2.77758	0.996715		3.58585	4.67288	2.81847	0.997037		0.0529	0.266579	-0.14554	-0.0664117		0.12228	0.627527	-0.07258	-0.0350374		0.057375	0.464575	-0.066125	-0.0346114		0.173575	0.887511	-0.022	-0.011008
	226.5	4.5452	5.64804	3.74046	0.997047		4.31272	5.2302	3.48814	0.99762		3.47008	5.01528	2.77818	0.99693		3.58628	4.67343	2.8189	0.997188		0.05276	0.265874	-0.14568	-0.0664756		0.12584	0.645797	-0.06902	-0.0333189		0.059225	0.479555	-0.064275	-0.033643		0.1742	0.890707	-0.021375	-0.0106953
	226.8	4.5457	5.64866	3.74096	0.99718		4.31208	5.22943	3.4875	0.997437		3.46928	5.01413	2.77738	0.996643		3.58668	4.67395	2.8193	0.997329		0.05274	0.265773	-0.1457	-0.0664848		0.125	0.641486	-0.06986	-0.0337244		0.056775	0.459717	-0.066725	-0.0349254		0.1724	0.881503	-0.023175	-0.0115959
	227.1	4.5465	5.64965	3.74176	0.997393		4.31176	5.22904	3.48718	0.997346		3.46948	5.01442	2.77758	0.996715		3.58628	4.67343	2.8189	0.997188		0.0511	0.257509	-0.14734	-0.0672331		0.1234	0.633275	-0.07146	-0.0344967		0.0576	0.466397	-0.0659	-0.0344936		0.172175	0.880353	-0.0234	-0.0117085
	227.4	4.54504	5.64784	3.7403	0.997004		4.31258	5.23003	3.488	0.99758		3.4699	5.01503	2.778	0.996867		3.58668	4.67395	2.8193	0.997329		0.0495	0.249446	-0.14894	-0.0679632		0.12422	0.637483	-0.07064	-0.0341009		0.0584	0.472874	-0.0651	-0.0340748		0.1742	0.890707	-0.021375	-0.0106953
	227.7	4.5457	5.64866	3.74096	0.99718		4.3126	5.23006	3.48802	0.997586		3.46928	5.01413	2.77738	0.996643		3.58625	4.6734	2.81887	0.997179		0.04868	0.245313	-0.14976	-0.0683374		0.12194	0.625783	-0.07292	-0.0352015		0.0576	0.466397	-0.0659	-0.0344936		0.174175	0.890579	-0.0214	-0.0107078
	228	4.54522	5.64806	3.74048	0.997052		4.31276	5.23025	3.48818	0.997632		3.46948	5.01442	2.77758	0.996715		3.58568	4.67265	2.8183	0.996975		0.0505	0.254485	-0.14794	-0.0675069		0.12262	0.629272	-0.07224	-0.0348733		0.057175	0.462955	-0.066325	-0.034716		0.1754	0.896843	-0.020175	-0.0100948
	228.3	4.54798	5.65149	3.74324	0.997788		4.31258	5.23003	3.488	0.99758		3.46968	5.01471	2.77778	0.996787		3.58648	4.67369	2.8191	0.997258		0.05454	0.274844	-0.1439	-0.0656634		0.12472	0.640049	-0.07014	-0.0338595		0.057575	0.466194	-0.065925	-0.0345067		0.17605	0.900166	-0.019525	-0.00976958
	228.6	4.5457	5.64866	3.74096	0.99718		4.31208	5.22943	3.4875	0.997437		3.46825	5.01265	2.77635	0.996275		3.5865	4.67373	2.81913	0.997267		0.05504	0.277363	-0.1434	-0.0654352		0.12666	0.650005	-0.0682	-0.032923		0.058825	0.476316	-0.064675	-0.0338524		0.17805	0.910392	-0.017525	-0.00876886
	228.9	4.54536	5.64823	3.74062	0.997089		4.31146	5.22867	3.48688	0.99726		3.46825	5.01265	2.77635	0.996275		3.58585	4.67288	2.81847	0.997037		0.05584	0.281395	-0.1426	-0.0650702		0.1291	0.662527	-0.06576	-0.0317451		0.059	0.477733	-0.0645	-0.0337608		0.17785	0.90937	-0.017725	-0.00886893
	229.2	4.5452	5.64804	3.74046	0.997047		4.3121	5.22945	3.48752	0.997443		3.4699	5.01503	2.778	0.996867		3.58505	4.67184	2.81767	0.996754		0.05682	0.286333	-0.14162	-0.064623		0.12976	0.665914	-0.0651	-0.0314265		0.057175	0.462955	-0.066325	-0.034716		0.17725	0.906302	-0.018325	-0.00916915
	229.5	4.54538	5.64826	3.74064	0.997095		4.31226	5.22964	3.48768	0.997489		3.46885	5.01351	2.77695	0.996491		3.58545	4.67236	2.81807	0.996896		0.0568	0.286233	-0.14164	-0.0646321		0.1304	0.669198	-0.06446	-0.0311175		0.0568	0.459919	-0.0667	-0.0349123		0.17825	0.911415	-0.017325	-0.00866878
	229.8	4.54472	5.64744	3.73998	0.996919		4.3108	5.22787	3.48622	0.997071		3.46988	5.01499	2.77798	0.996858		3.58525	4.6721	2.81787	0.996825		0.057	0.28724	-0.14144	-0.0645409		0.1301	0.667659	-0.06476	-0.0312624		0.055375	0.448381	-0.068125	-0.0356582		0.178875	0.914611	-0.0167	-0.00835606
	230.1	4.54424	5.64684	3.7395	0.996791		4.3108	5.22787	3.48622	0.997071		3.4697	5.01474	2.7778	0.996796		3.58505	4.67184	2.81767	0.996754		0.05764	0.290466	-0.1408	-0.0642488		0.13122	0.673407	-0.06364	-0.0307217		0.0523	0.423482	-0.0712	-0.0372677		0.17725	0.906302	-0.018325	-0.00916915
	230.4	4.54278	5.64503	3.73804	0.996401		4.31096	5.22807	3.48638	0.997117		3.47052	5.01593	2.77862	0.997092		3.58545	4.67236	2.81807	0.996896		0.05666	0.285527	-0.14178	-0.064696		0.13058	0.670122	-0.06428	-0.0310307		0.0525	0.425101	-0.071	-0.037163		0.175825	0.899016	-0.01975	-0.00988216
	230.7	4.5444	5.64704	3.73966	0.996833		4.3111	5.22824	3.48652	0.997157		3.46925	5.01409	2.77735	0.996634		3.58465	4.67131	2.81727	0.996613		0.06006	0.302661	-0.13838	-0.0631445		0.12944	0.664272	-0.06542	-0.031581		0.04885	0.395547	-0.07465	-0.0390735		0.174575	0.892624	-0.021	-0.0105076
	231	4.54378	5.64627	3.73904	0.996668		4.3121	5.22945	3.48752	0.997443		3.46905	5.0138	2.77715	0.996562		3.58485	4.67158	2.81747	0.996684		0.0604	0.304374	-0.13804	-0.0629894		0.12828	0.658319	-0.06658	-0.032141		0.05005	0.405263	-0.07345	-0.0384454		0.1754	0.896843	-0.020175	-0.0100948
	231.3	4.54472	5.64744	3.73998	0.996919		4.31144	5.22865	3.48686	0.997254		3.46868	5.01326	2.77678	0.996428		3.58565	4.67262	2.81827	0.996967		0.06186	0.311732	-0.13658	-0.0623232		0.1278	0.655855	-0.06706	-0.0323727		0.0517	0.418623	-0.0718	-0.0375818		0.1742	0.890707	-0.021375	-0.0106953
	231.6	4.54422	5.64682	3.73948	0.996785		4.31112	5.22826	3.48654	0.997163		3.46663	5.0103	2.77473	0.995692		3.58485	4.67158	2.81747	0.996684		0.06236	0.314251	-0.13608	-0.062095		0.12684	0.650929	-0.06802	-0.0328361		0.050675	0.410324	-0.072825	-0.0381183		0.172775	0.883421	-0.0228	-0.0114083
	231.9	4.5444	5.64704	3.73966	0.996833		4.31112	5.22826	3.48654	0.997163		3.46905	5.0138	2.77715	0.996562		3.58445	4.67105	2.81707	0.996542		0.0617	0.310925	-0.13674	-0.0623962		0.12668	0.650108	-0.06818	-0.0329133		0.055975	0.453239	-0.067525	-0.0353442		0.1752	0.89582	-0.020375	-0.0101949
	232.2	4.5436	5.64605	3.73886	0.99662		4.3108	5.22787	3.48622	0.997071		3.46888	5.01355	2.77698	0.996499		3.58405	4.67053	2.81668	0.996401		0.06186	0.311732	-0.13658	-0.0623232		0.12746	0.654111	-0.0674	-0.0325368		0.05495	0.444939	-0.06855	-0.0358807		0.176425	0.902084	-0.01915	-0.00958195
	232.5	4.54408	5.64664	3.73934	0.996748		4.31144	5.22865	3.48686	0.997254		3.46745	5.01149	2.77555	0.995988		3.58305	4.66923	2.81568	0.996047		0.06266	0.315763	-0.13578	-0.0619581		0.12878	0.660885	-0.06608	-0.0318996		0.052925	0.428543	-0.070575	-0.0369406		0.174575	0.892624	-0.021	-0.0105076
	232.8	4.5452	5.64804	3.74046	0.997047		4.31112	5.22826	3.48654	0.997163		3.46845	5.01294	2.77655	0.996347		3.58305	4.66923	2.81568	0.996047		0.06416	0.323322	-0.13428	-0.0612737		0.12958	0.66499	-0.06528	-0.0315134		0.05455	0.4417	-0.06895	-0.03609		0.1746	0.892752	-0.020975	-0.0104951
	233.1	4.54424	5.64684	3.7395	0.996791		4.31076	5.22783	3.48618	0.99706		3.46865	5.01322	2.77675	0.996419		3.58427	4.67083	2.8169	0.99648		0.06268	0.315864	-0.13576	-0.061949		0.12908	0.662424	-0.06578	-0.0317548		0.055575	0.45	-0.067925	-0.0355535		0.177025	0.905151	-0.01855	-0.00928173
	233.4	4.54556	5.64848	3.74082	0.997143		4.31062	5.22766	3.48604	0.99702		3.46782	5.01203	2.77592	0.996123		3.58263	4.66868	2.81525	0.995896		0.06384	0.321709	-0.1346	-0.0614197		0.13088	0.671662	-0.06398	-0.0308858		0.05515	0.446559	-0.06835	-0.035776		0.17785	0.90937	-0.017725	-0.00886893
	233.7	4.54392	5.64644	3.73918	0.996705		4.31062	5.22766	3.48604	0.99702		3.46825	5.01265	2.77635	0.996275		3.58305	4.66923	2.81568	0.996047		0.06432	0.324128	-0.13412	-0.0612006		0.13022	0.668275	-0.06464	-0.0312044		0.054975	0.445142	-0.068525	-0.0358676		0.17805	0.910392	-0.017525	-0.00876886
	234	4.54488	5.64764	3.74014	0.996961		4.31046	5.22746	3.48588	0.996974		3.46865	5.01322	2.77675	0.996419		3.58323	4.66946	2.81585	0.996109		0.06626	0.333904	-0.13218	-0.0603154		0.13058	0.670122	-0.06428	-0.0310307		0.05455	0.4417	-0.06895	-0.03609		0.17805	0.910392	-0.017525	-0.00876886
	234.3	4.5457	5.64866	3.74096	0.99718		4.31046	5.22746	3.48588	0.996974		3.46802	5.01232	2.77612	0.996194		3.58345	4.66975	2.81608	0.996188		0.06788	0.342068	-0.13056	-0.0595762		0.13042	0.669301	-0.06444	-0.0311079		0.05535	0.448178	-0.06815	-0.0356713		0.178075	0.91052	-0.0175	-0.00875635
	234.6	4.5444	5.64704	3.73966	0.996833		4.31012	5.22705	3.48554	0.996877		3.46885	5.01351	2.77695	0.996491		3.58425	4.67079	2.81688	0.996471		0.06772	0.341262	-0.13072	-0.0596492		0.12944	0.664272	-0.06542	-0.031581		0.0568	0.459919	-0.0667	-0.0349123		0.177225	0.906174	-0.01835	-0.00918166
	234.9	4.54408	5.64664	3.73934	0.996748		4.30948	5.22627	3.4849	0.996694		3.46703	5.01088	2.77513	0.995836		3.58343	4.66972	2.81605	0.996179		0.07018	0.353659	-0.12826	-0.0585267		0.12894	0.661706	-0.06592	-0.0318224		0.05435	0.440081	-0.06915	-0.0361947		0.176225	0.901061	-0.01935	-0.00968202
	235.2	4.54344	5.64585	3.7387	0.996577		4.30932	5.22608	3.48474	0.996648		3.46762	5.01174	2.77572	0.996051		3.58305	4.66923	2.81568	0.996047		0.07116	0.358597	-0.12728	-0.0580795		0.12944	0.664272	-0.06542	-0.031581		0.0527	0.426721	-0.0708	-0.0370584		0.17745	0.907325	-0.018125	-0.00906908
	235.5	4.54246	5.64463	3.73772	0.996316		4.31012	5.22705	3.48554	0.996877		3.46825	5.01265	2.77635	0.996275		3.58365	4.67001	2.81628	0.996259		0.0705	0.355271	-0.12794	-0.0583806		0.12828	0.658319	-0.06658	-0.032141		0.05455	0.4417	-0.06895	-0.03609		0.174825	0.893903	-0.02075	-0.0103825
	235.8	4.5444	5.64704	3.73966	0.996833		4.31028	5.22724	3.4857	0.996923		3.46765	5.01178	2.77575	0.99606		3.58305	4.66923	2.81568	0.996047		0.0695	0.350232	-0.12894	-0.058837		0.12876	0.660782	-0.0661	-0.0319092		0.055575	0.45	-0.067925	-0.0355535		0.172375	0.881375	-0.0232	-0.0116084
	236.1	4.54294	5.64523	3.7382	0.996444		4.30948	5.22627	3.4849	0.996694		3.46822	5.01261	2.77632	0.996266		3.58325	4.66949	2.81588	0.996118		0.06756	0.340456	-0.13088	-0.0597222		0.12812	0.657498	-0.06674	-0.0322182		0.05535	0.448178	-0.06815	-0.0356713		0.17115	0.875112	-0.024425	-0.0122214
	236.4	4.54326	5.64562	3.73852	0.996529		4.3111	5.22824	3.48652	0.997157		3.46807	5.01239	2.77617	0.996212		3.58365	4.67001	2.81628	0.996259		0.06658	0.335517	-0.13186	-0.0601694		0.12778	0.655753	-0.06708	-0.0323823		0.0574	0.464777	-0.0661	-0.0345983		0.17215	0.880225	-0.023425	-0.011721
	236.7	4.54424	5.64684	3.7395	0.996791		4.31028	5.22724	3.4857	0.996923		3.46723	5.01116	2.77533	0.995907		3.582	4.66786	2.81462	0.995675		0.06558	0.330478	-0.13286	-0.0606257		0.12714	0.652468	-0.06772	-0.0326913		0.0572	0.463158	-0.0663	-0.034703		0.17155	0.877157	-0.024025	-0.0120212
	237	4.5428	5.64505	3.73806	0.996407		4.3098	5.22666	3.48522	0.996785		3.46822	5.01261	2.77632	0.996266		3.58303	4.6692	2.81565	0.996038		0.06382	0.321609	-0.13462	-0.0614288		0.12614	0.647337	-0.06872	-0.033174		0.0588	0.476113	-0.0647	-0.0338655		0.172775	0.883421	-0.0228	-0.0114083
	237.3	4.54296	5.64525	3.73822	0.996449		4.30996	5.22685	3.48538	0.996831		3.46868	5.01326	2.77678	0.996428		3.58323	4.66946	2.81585	0.996109		0.06416	0.323322	-0.13428	-0.0612737		0.12828	0.658319	-0.06658	-0.032141		0.06045	0.489474	-0.06305	-0.0330018		0.172775	0.883421	-0.0228	-0.0114083
	237.6	4.5436	5.64605	3.73886	0.99662		4.31016	5.2271	3.48558	0.996888		3.46767	5.01182	2.77577	0.996069		3.58343	4.66972	2.81605	0.996179		0.06398	0.322415	-0.13446	-0.0613558		0.12912	0.66263	-0.06574	-0.0317355		0.059225	0.479555	-0.064275	-0.033643		0.174175	0.890579	-0.0214	-0.0107078
	237.9	4.54294	5.64523	3.7382	0.996444		4.30948	5.22627	3.4849	0.996694		3.46742	5.01145	2.77553	0.995979		3.58365	4.67001	2.81628	0.996259		0.06284	0.31667	-0.1356	-0.061876		0.12926	0.663348	-0.0656	-0.0316679		0.0582	0.471255	-0.0653	-0.0341795		0.175025	0.894925	-0.02055	-0.0102825
	238.2	4.54328	5.64565	3.73854	0.996535		4.30966	5.22649	3.48508	0.996745		3.46765	5.01178	2.77575	0.99606		3.58343	4.66972	2.81605	0.996179		0.0612	0.308406	-0.13724	-0.0626243		0.12862	0.660064	-0.06624	-0.0319768		0.059225	0.479555	-0.064275	-0.033643		0.176425	0.902084	-0.01915	-0.00958195
	238.5	4.54228	5.64441	3.73754	0.996268		4.31014	5.22707	3.48556	0.996883		3.46597	5.00936	2.77407	0.995459		3.58202	4.66789	2.81465	0.995684		0.06416	0.323322	-0.13428	-0.0612737		0.12942	0.664169	-0.06544	-0.0315906		0.058	0.469636	-0.0655	-0.0342842		0.175225	0.895948	-0.02035	-0.0101824
	238.8	4.54328	5.64565	3.73854	0.996535		4.30998	5.22688	3.4854	0.996837		3.46765	5.01178	2.77575	0.99606		3.58283	4.66894	2.81545	0.995967		0.06416	0.323322	-0.13428	-0.0612737		0.1309	0.671764	-0.06396	-0.0308762		0.0582	0.471255	-0.0653	-0.0341795		0.17725	0.906302	-0.018325	-0.00916915
	239.1	4.54164	5.64361	3.7369	0.996098		4.30982	5.22669	3.48524	0.996791		3.4666	5.01026	2.7747	0.995683		3.5828	4.6689	2.81542	0.995958		0.06138	0.309313	-0.13706	-0.0625422		0.13252	0.680078	-0.06234	-0.0300941		0.0582	0.471255	-0.0653	-0.0341795		0.178275	0.911543	-0.0173	-0.00865628
	239.4	4.54376	5.64625	3.73902	0.996663		4.31016	5.2271	3.48558	0.996888		3.46742	5.01145	2.77553	0.995979		3.58283	4.66894	2.81545	0.995967		0.06608	0.332997	-0.13236	-0.0603975		0.13252	0.680078	-0.06234	-0.0300941		0.0588	0.476113	-0.0647	-0.0338655		0.1803	0.921897	-0.015275	-0.00764304
	239.7	4.54214	5.64423	3.7374	0.996231		4.31014	5.22707	3.48556	0.996883		3.467	5.01084	2.7751	0.995827		3.58283	4.66894	2.81545	0.995967		0.0648	0.326547	-0.13364	-0.0609816		0.13042	0.669301	-0.06444	-0.0311079		0.0574	0.464777	-0.0661	-0.0345983		0.182125	0.931228	-0.01345	-0.00672988
	240	4.54312	5.64545	3.73838	0.996492		4.30982	5.22669	3.48524	0.996791		3.4664	5.00997	2.7745	0.995611		3.58265	4.66871	2.81528	0.995905		0.06512	0.32816	-0.13332	-0.0608356		0.13122	0.673407	-0.06364	-0.0307217		0.055975	0.453239	-0.067525	-0.0353442		0.181925	0.930206	-0.01365	-0.00682995
	240.3	4.54328	5.64565	3.73854	0.996535		4.30966	5.22649	3.48508	0.996745		3.46703	5.01088	2.77513	0.995836		3.58243	4.66842	2.81505	0.995826		0.0653	0.329067	-0.13314	-0.0607535		0.13186	0.676691	-0.063	-0.0304127		0.054325	0.439879	-0.069175	-0.0362078		0.181125	0.926115	-0.01445	-0.00723024
	240.6	4.54228	5.64441	3.73754	0.996268		4.30964	5.22647	3.48506	0.99674		3.46703	5.01088	2.77513	0.995836		3.5818	4.6676	2.81442	0.995605		0.0648	0.326547	-0.13364	-0.0609816		0.13316	0.683362	-0.0617	-0.0297852		0.054125	0.438259	-0.069375	-0.0363125		0.181725	0.929183	-0.01385	-0.00693002
	240.9	4.54246	5.64463	3.73772	0.996316		4.30966	5.22649	3.48508	0.996745		3.46683	5.01059	2.77493	0.995764		3.5814	4.66708	2.81402	0.995463		0.0661	0.333098	-0.13234	-0.0603884		0.13546	0.695166	-0.0594	-0.0286749		0.052925	0.428543	-0.070575	-0.0369406		0.181525	0.928161	-0.01405	-0.0070301
	241.2	4.54392	5.64644	3.73918	0.996705		4.30948	5.22627	3.4849	0.996694		3.4662	5.00968	2.7743	0.99554		3.5822	4.66812	2.81482	0.995746		0.06772	0.341262	-0.13072	-0.0596492		0.13808	0.708611	-0.05678	-0.0274101		0.0527	0.426721	-0.0708	-0.0370584		0.184375	0.942733	-0.0112	-0.00560406
	241.5	4.54326	5.64562	3.73852	0.996529		4.30918	5.22591	3.4846	0.996608		3.46663	5.0103	2.77473	0.995692		3.58182	4.66763	2.81445	0.995613		0.06986	0.352046	-0.12858	-0.0586727		0.13902	0.713435	-0.05584	-0.0269563		0.052725	0.426923	-0.070775	-0.0370453		0.182125	0.931228	-0.01345	-0.00672988
	241.8	4.54214	5.64423	3.7374	0.996231		4.30834	5.22489	3.48376	0.996368		3.46603	5.00943	2.77413	0.995477		3.5814	4.66708	2.81402	0.995463		0.06902	0.347813	-0.12942	-0.059056		0.13756	0.705943	-0.0573	-0.0276611		0.053725	0.43502	-0.069775	-0.0365219		0.1813	0.92701	-0.014275	-0.00714268
	242.1	4.54472	5.64744	3.73998	0.996919		4.30948	5.22627	3.4849	0.996694		3.46725	5.0112	2.77535	0.995916		3.58182	4.66763	2.81445	0.995613		0.07032	0.354364	-0.12812	-0.0584628		0.13642	0.700092	-0.05844	-0.0282114		0.057975	0.469433	-0.065525	-0.0342973		0.179875	0.919724	-0.0157	-0.0078557
	242.4	4.54262	5.64483	3.73788	0.996359		4.308	5.22448	3.48342	0.996271		3.46685	5.01062	2.77495	0.995773		3.5816	4.66734	2.81422	0.995534		0.0682	0.343681	-0.13024	-0.0594302		0.1356	0.695884	-0.05926	-0.0286073		0.057975	0.469433	-0.065525	-0.0342973		0.178875	0.914611	-0.0167	-0.00835606
	242.7	4.54294	5.64523	3.7382	0.996444		4.3082	5.22472	3.48362	0.996328		3.46617	5.00965	2.77427	0.995531		3.581	4.66656	2.81363	0.995322		0.0682	0.343681	-0.13024	-0.0594302		0.13514	0.693524	-0.05972	-0.0288294		0.057175	0.462955	-0.066325	-0.034716		0.1797	0.918829	-0.015875	-0.00794326
	243	4.54214	5.64423	3.7374	0.996231		4.3077	5.22411	3.48312	0.996185		3.46623	5.00972	2.77433	0.995549		3.58223	4.66815	2.81485	0.995755		0.06722	0.338742	-0.13122	-0.0598773		0.13528	0.694242	-0.05958	-0.0287618		0.0578	0.468016	-0.0657	-0.0343889		0.18215	0.931356	-0.013425	-0.00671737
	243.3	4.54522	5.64806	3.74048	0.997052		4.30916	5.22588	3.48458	0.996602		3.4656	5.00882	2.7737	0.995324		3.5816	4.66734	2.81422	0.995534		0.06836	0.344487	-0.13008	-0.0593571		0.13562	0.695987	-0.05924	-0.0285976		0.0562	0.455061	-0.0673	-0.0352264		0.18275	0.934424	-0.012825	-0.00641715
	243.6	4.54198	5.64403	3.73724	0.996188		4.3085	5.22508	3.48392	0.996414		3.46623	5.00972	2.77433	0.995549		3.5812	4.66682	2.81383	0.995392		0.064	0.322516	-0.13444	-0.0613467		0.1348	0.691779	-0.06006	-0.0289935		0.058575	0.474291	-0.064925	-0.0339833		0.181325	0.927138	-0.01425	-0.00713017
	243.9	4.54196	5.64401	3.73722	0.996183		4.3082	5.22472	3.48362	0.996328		3.4662	5.00968	2.7743	0.99554		3.58202	4.66789	2.81465	0.995684		0.06496	0.327353	-0.13348	-0.0609086		0.13578	0.696808	-0.05908	-0.0285204		0.059025	0.477935	-0.064475	-0.0337477		0.18275	0.934424	-0.012825	-0.00641715
	244.2	4.54148	5.64341	3.73674	0.996055		4.30802	5.2245	3.48344	0.996276		3.4662	5.00968	2.7743	0.99554		3.5808	4.6663	2.81343	0.995251		0.06464	0.325741	-0.1338	-0.0610546		0.13596	0.697732	-0.0589	-0.0284335		0.059	0.477733	-0.0645	-0.0337608		0.182725	0.934296	-0.01285	-0.00642966
	244.5	4.54228	5.64441	3.73754	0.996268		4.30784	5.22428	3.48326	0.996225		3.46643	5.01001	2.77453	0.99562		3.5816	4.66734	2.81422	0.995534		0.06642	0.334711	-0.13202	-0.0602424		0.1364	0.69999	-0.05846	-0.0282211		0.0586	0.474494	-0.0649	-0.0339702		0.18155	0.928288	-0.014025	-0.00701759
	244.8	4.54212	5.64421	3.73738	0.996226		4.30786	5.22431	3.48328	0.99623		3.466	5.00939	2.7741	0.995468		3.5816	4.66734	2.81422	0.995534		0.06578	0.331486	-0.13266	-0.0605344		0.13724	0.704301	-0.05762	-0.0278156		0.0586	0.474494	-0.0649	-0.0339702		0.18295	0.935447	-0.012625	-0.00631708
	245.1	4.54246	5.64463	3.73772	0.996316		4.30718	5.22348	3.4826	0.996036		3.46497	5.00791	2.77307	0.9951		3.5812	4.66682	2.81383	0.995392		0.06594	0.332292	-0.1325	-0.0604614		0.13528	0.694242	-0.05958	-0.0287618		0.055775	0.451619	-0.067725	-0.0354488		0.181725	0.929183	-0.01385	-0.00693002
	245.4	4.54068	5.64242	3.73594	0.995842		4.30802	5.2245	3.48344	0.996276		3.4658	5.00911	2.7739	0.995396		3.5814	4.66708	2.81402	0.995463		0.06512	0.32816	-0.13332	-0.0608356		0.13498	0.692702	-0.05988	-0.0289066		0.053725	0.43502	-0.069775	-0.0365219		0.183975	0.940688	-0.0116	-0.00580421
	245.7	4.54148	5.64341	3.73674	0.996055		4.30638	5.22251	3.4818	0.995807		3.46537	5.00849	2.77347	0.995244		3.5816	4.66734	2.81422	0.995534		0.06626	0.333904	-0.13218	-0.0603154		0.1348	0.691779	-0.06006	-0.0289935		0.056975	0.461336	-0.066525	-0.0348207		0.18275	0.934424	-0.012825	-0.00641715
	246	4.54148	5.64341	3.73674	0.996055		4.30768	5.22409	3.4831	0.996179		3.46663	5.0103	2.77473	0.995692		3.583	4.66916	2.81562	0.996029		0.06578	0.331486	-0.13266	-0.0605344		0.13528	0.694242	-0.05958	-0.0287618		0.0574	0.464777	-0.0661	-0.0345983		0.182525	0.933274	-0.01305	-0.00652973
	246.3	4.54052	5.64222	3.73578	0.995799		4.30718	5.22348	3.4826	0.996036		3.46683	5.01059	2.77493	0.995764		3.5824	4.66838	2.81502	0.995817		0.06528	0.328966	-0.13316	-0.0607626		0.13576	0.696705	-0.0591	-0.0285301		0.056775	0.459717	-0.066725	-0.0349254		0.18335	0.937492	-0.012225	-0.00611693
	246.6	4.53956	5.64103	3.73482	0.995543		4.30768	5.22409	3.4831	0.996179		3.46623	5.00972	2.77433	0.995549		3.581	4.66656	2.81363	0.995322		0.06302	0.317577	-0.13542	-0.0617939		0.13464	0.690958	-0.06022	-0.0290707		0.055775	0.451619	-0.067725	-0.0354488		0.183175	0.936597	-0.0124	-0.0062045
	246.9	4.54066	5.64239	3.73592	0.995836		4.30752	5.2239	3.48294	0.996133		3.46705	5.01091	2.77515	0.995845		3.58098	4.66653	2.8136	0.995313		0.0625	0.314957	-0.13594	-0.0620311		0.13334	0.684286	-0.06152	-0.0296983		0.05575	0.451417	-0.06775	-0.0354619		0.18295	0.935447	-0.012625	-0.00631708
	247.2	4.54098	5.64279	3.73624	0.995922		4.30674	5.22295	3.48216	0.99591		3.46597	5.00936	2.77407	0.995459		3.58018	4.66548	2.8128	0.99503		0.06268	0.315864	-0.13576	-0.061949		0.1335	0.685107	-0.06136	-0.029621		0.05395	0.436842	-0.06955	-0.0364041		0.18275	0.934424	-0.012825	-0.00641715
	247.5	4.54164	5.64361	3.7369	0.996098		4.30686	5.2231	3.48228	0.995944		3.46663	5.0103	2.77473	0.995692		3.57998	4.66522	2.8126	0.994959		0.06316	0.318283	-0.13528	-0.06173		0.13496	0.6926	-0.0599	-0.0289162		0.053325	0.431781	-0.070175	-0.0367312		0.182325	0.932251	-0.01325	-0.00662981
	247.8	4.54114	5.64299	3.7364	0.995964		4.3072	5.22351	3.48262	0.996042		3.4652	5.00824	2.7733	0.995181		3.58058	4.666	2.8132	0.995171		0.06416	0.323322	-0.13428	-0.0612737		0.13496	0.6926	-0.0599	-0.0289162		0.05475	0.44332	-0.06875	-0.0359853		0.18275	0.934424	-0.012825	-0.00641715
	248.1	4.54164	5.64361	3.7369	0.996098		4.3072	5.22351	3.48262	0.996042		3.46557	5.00878	2.77367	0.995315		3.5802	4.66552	2.81283	0.995039		0.0635	0.319996	-0.13494	-0.0615748		0.13596	0.697732	-0.0589	-0.0284335		0.055975	0.453239	-0.067525	-0.0353442		0.181925	0.930206	-0.01365	-0.00682995
	248.4	4.54214	5.64423	3.7374	0.996231		4.30688	5.22312	3.4823	0.99595		3.46497	5.00791	2.77307	0.9951		3.58018	4.66548	2.8128	0.99503		0.0661	0.333098	-0.13234	-0.0603884		0.13482	0.691881	-0.06004	-0.0289838		0.05575	0.451417	-0.06775	-0.0354619		0.181325	0.927138	-0.01425	-0.00713017
	248.7	4.5402	5.64182	3.73546	0.995714		4.30638	5.22251	3.4818	0.995807		3.4658	5.00911	2.7739	0.995396		3.58162	4.66737	2.81425	0.995543		0.06448	0.324934	-0.13396	-0.0611276		0.1343	0.689213	-0.06056	-0.0292349		0.0586	0.474494	-0.0649	-0.0339702		0.18215	0.931356	-0.013425	-0.00671737
	249	4.53968	5.64118	3.73494	0.995575		4.30526	5.22116	3.48068	0.995487		3.46537	5.00849	2.77347	0.995244		3.57978	4.66496	2.8124	0.994888		0.06562	0.330679	-0.13282	-0.0606074		0.13236	0.679257	-0.0625	-0.0301714		0.059025	0.477935	-0.064475	-0.0337477		0.181525	0.928161	-0.01405	-0.0070301
	249.3	4.54036	5.64202	3.73562	0.995756		4.30622	5.22232	3.48164	0.995761		3.46497	5.00791	2.77307	0.9951		3.58015	4.66545	2.81277	0.995021		0.06562	0.330679	-0.13282	-0.0606074		0.13074	0.670943	-0.06412	-0.0309534		0.0586	0.474494	-0.0649	-0.0339702		0.181125	0.926115	-0.01445	-0.00723024
	249.6	4.5405	5.64219	3.73576	0.995794		4.30572	5.22171	3.48114	0.995618		3.4652	5.00824	2.7733	0.995181		3.58058	4.666	2.8132	0.995171		0.06562	0.330679	-0.13282	-0.0606074		0.13024	0.668377	-0.06462	-0.0311948		0.059825	0.484413	-0.063675	-0.033329		0.179675	0.918701	-0.0159	-0.00795577
	249.9	4.53986	5.6414	3.73512	0.995623		4.3054	5.22132	3.48082	0.995527		3.46437	5.00705	2.77248	0.994885		3.58015	4.66545	2.81277	0.995021		0.06316	0.318283	-0.13528	-0.06173		0.13204	0.677615	-0.06282	-0.0303259		0.059825	0.484413	-0.063675	-0.033329		0.179675	0.918701	-0.0159	-0.00795577
	250.2	4.5405	5.64219	3.73576	0.995794		4.3064	5.22254	3.48182	0.995813		3.46497	5.00791	2.77307	0.9951		3.57938	4.66444	2.812	0.994747		0.0638	0.321508	-0.13464	-0.0614379		0.13332	0.684184	-0.06154	-0.0297079		0.05985	0.484615	-0.06365	-0.0333159		0.1791	0.915761	-0.016475	-0.00824348
	250.5	4.54016	5.64177	3.73542	0.995703		4.30508	5.22094	3.4805	0.995435		3.46497	5.00791	2.77307	0.9951		3.58035	4.66571	2.81297	0.995092		0.06416	0.323322	-0.13428	-0.0612737		0.1325	0.679975	-0.06236	-0.0301038		0.058825	0.476316	-0.064675	-0.0338524		0.180075	0.920747	-0.0155	-0.00775562
	250.8	4.53952	5.64098	3.73478	0.995533		4.30592	5.22196	3.48134	0.995676		3.46457	5.00733	2.77268	0.994956		3.58038	4.66574	2.813	0.995101		0.06464	0.325741	-0.1338	-0.0610546		0.13252	0.680078	-0.06234	-0.0300941		0.06065	0.491093	-0.06285	-0.0328971		0.1801	0.920874	-0.015475	-0.00774311
	251.1	4.5397	5.6412	3.73496	0.99558		4.3067	5.2229	3.48212	0.995899		3.4646	5.00737	2.7727	0.994965		3.58018	4.66548	2.8128	0.99503		0.06398	0.322415	-0.13446	-0.0613558		0.13154	0.675049	-0.06332	-0.0305672		0.059825	0.484413	-0.063675	-0.033329		0.179475	0.917679	-0.0161	-0.00805584
	251.4	4.53954	5.641	3.7348	0.995538		4.30638	5.22251	3.4818	0.995807		3.46398	5.00647	2.77208	0.994741		3.5802	4.66552	2.81283	0.995039		0.06268	0.315864	-0.13576	-0.061949		0.13056	0.67002	-0.0643	-0.0310403		0.0588	0.476113	-0.0647	-0.0338655		0.1813	0.92701	-0.014275	-0.00714268
	251.7	4.5392	5.64058	3.73446	0.995447		4.30638	5.22251	3.4818	0.995807		3.46537	5.00849	2.77347	0.995244		3.57935	4.66441	2.81197	0.994738		0.06268	0.315864	-0.13576	-0.061949		0.13138	0.674228	-0.06348	-0.0306445		0.0588	0.476113	-0.0647	-0.0338655		0.1805	0.92292	-0.015075	-0.00754297
	252	4.5395	5.64095	3.73476	0.995527		4.3064	5.22254	3.48182	0.995813		3.46358	5.00589	2.77168	0.994598		3.57998	4.66522	2.8126	0.994959		0.06286	0.316771	-0.13558	-0.0618669		0.13234	0.679154	-0.06252	-0.030181		0.05555	0.449798	-0.06795	-0.0355666		0.182725	0.934296	-0.01285	-0.00642966
	252.3	4.5402	5.64182	3.73546	0.995714		4.30624	5.22234	3.48166	0.995767		3.46418	5.00676	2.77228	0.994813		3.57915	4.66415	2.81177	0.994667		0.06478	0.326446	-0.13366	-0.0609907		0.13316	0.683362	-0.0617	-0.0297852		0.056975	0.461336	-0.066525	-0.0348207		0.18315	0.936469	-0.012425	-0.00621701
	252.6	4.5397	5.6412	3.73496	0.99558		4.30606	5.22213	3.48148	0.995716		3.46338	5.0056	2.77148	0.994526		3.57958	4.6647	2.8122	0.994818		0.06364	0.320701	-0.1348	-0.0615109		0.13302	0.682644	-0.06184	-0.0298528		0.056175	0.454858	-0.067325	-0.0352395		0.184575	0.943756	-0.011	-0.00550399
	252.9	4.5405	5.64219	3.73576	0.995794		4.30556	5.22152	3.48098	0.995573		3.46318	5.00531	2.77128	0.994454		3.57998	4.66522	2.8126	0.994959		0.0648	0.326547	-0.13364	-0.0609816		0.13332	0.684184	-0.06154	-0.0297079		0.05495	0.444939	-0.06855	-0.0358807		0.184775	0.944778	-0.0108	-0.00540392
	253.2	4.53938	5.6408	3.73464	0.995495		4.30574	5.22174	3.48116	0.995624		3.46215	5.00383	2.77025	0.994086		3.57935	4.66441	2.81197	0.994738		0.0653	0.329067	-0.13314	-0.0607535		0.13512	0.693421	-0.05974	-0.028839		0.053925	0.43664	-0.069575	-0.0364172		0.187625	0.959351	-0.00795	-0.00397788
	253.5	4.53954	5.641	3.7348	0.995538		4.30654	5.22271	3.48196	0.995853		3.46278	5.00473	2.77088	0.994311		3.57855	4.66337	2.81117	0.994455		0.0648	0.326547	-0.13364	-0.0609816		0.13398	0.687571	-0.06088	-0.0293893		0.056975	0.461336	-0.066525	-0.0348207		0.189475	0.96881	-0.0061	-0.00305221
	253.8	4.54214	5.64423	3.7374	0.996231		4.30588	5.22191	3.4813	0.995664		3.46298	5.00502	2.77108	0.994382		3.57918	4.66418	2.8118	0.994676		0.06482	0.326648	-0.13362	-0.0609725		0.13382	0.686749	-0.06104	-0.0294666		0.056775	0.459717	-0.066725	-0.0349254		0.188625	0.964464	-0.00695	-0.00347752
	254.1	4.53872	5.63998	3.73398	0.995319		4.3059	5.22193	3.48132	0.99567		3.46278	5.00473	2.77088	0.994311		3.57812	4.66281	2.81075	0.994305		0.06334	0.31919	-0.1351	-0.0616478		0.13448	0.690137	-0.06038	-0.029148		0.057175	0.462955	-0.066325	-0.034716		0.18905	0.966637	-0.006525	-0.00326487
	254.4	4.53836	5.63954	3.73362	0.995223		4.30688	5.22312	3.4823	0.99595		3.46278	5.00473	2.77088	0.994311		3.57855	4.66337	2.81117	0.994455		0.06432	0.324128	-0.13412	-0.0612006		0.13612	0.698553	-0.05874	-0.0283563		0.05415	0.438462	-0.06935	-0.0362994		0.188675	0.964719	-0.0069	-0.0034525
	254.7	4.53856	5.63978	3.73382	0.995277		4.30606	5.22213	3.48148	0.995716		3.46378	5.00618	2.77188	0.994669		3.57835	4.6631	2.81098	0.994384		0.064	0.322516	-0.13444	-0.0613467		0.13776	0.706969	-0.0571	-0.0275646		0.0541	0.438057	-0.0694	-0.0363256		0.188275	0.962674	-0.0073	-0.00365265
	255	4.5397	5.6412	3.73496	0.99558		4.30606	5.22213	3.48148	0.995716		3.46338	5.0056	2.77148	0.994526		3.57693	4.66125	2.80955	0.99388		0.06414	0.323221	-0.1343	-0.0612828		0.13724	0.704301	-0.05762	-0.0278156		0.054325	0.439879	-0.069175	-0.0362078		0.1874	0.9582	-0.008175	-0.00409047
	255.3	4.53918	5.64055	3.73444	0.995442		4.30558	5.22154	3.481	0.995578		3.46358	5.00589	2.77168	0.994598		3.57835	4.6631	2.81098	0.994384		0.06204	0.312639	-0.1364	-0.062241		0.13806	0.708509	-0.0568	-0.0274197		0.054525	0.441498	-0.068975	-0.0361031		0.18965	0.969705	-0.005925	-0.00296465
	255.6	4.53822	5.63936	3.73348	0.995186		4.3059	5.22193	3.48132	0.99567		3.46398	5.00647	2.77208	0.994741		3.57835	4.6631	2.81098	0.994384		0.06086	0.306692	-0.13758	-0.0627795		0.1387	0.711793	-0.05616	-0.0271108		0.056575	0.458097	-0.066925	-0.0350301		0.18945	0.968682	-0.006125	-0.00306472
	255.9	4.5405	5.64219	3.73576	0.995794		4.30526	5.22116	3.48068	0.995487		3.46298	5.00502	2.77108	0.994382		3.57832	4.66307	2.81095	0.994375		0.06268	0.315864	-0.13576	-0.061949		0.13938	0.715283	-0.05548	-0.0267825		0.0564	0.45668	-0.0671	-0.0351217		0.18825	0.962546	-0.007325	-0.00366516
	256.2	4.53804	5.63914	3.7333	0.995138		4.30542	5.22135	3.48084	0.995533		3.465	5.00795	2.7731	0.995109		3.57812	4.66281	2.81075	0.994305		0.06088	0.306793	-0.13756	-0.0627704		0.13904	0.713538	-0.05582	-0.0269467		0.057175	0.462955	-0.066325	-0.034716		0.1876	0.959223	-0.007975	-0.00399039
	256.5	4.53952	5.64098	3.73478	0.995533		4.30492	5.22074	3.48034	0.99539		3.46418	5.00676	2.77228	0.994813		3.57773	4.66229	2.81035	0.994163		0.06058	0.305281	-0.13786	-0.0629073		0.1387	0.711793	-0.05616	-0.0271108		0.057375	0.464575	-0.066125	-0.0346114		0.1864	0.953087	-0.009175	-0.00459083
	256.8	4.53838	5.63956	3.73364	0.995229		4.30508	5.22094	3.4805	0.995435		3.46298	5.00502	2.77108	0.994382		3.57815	4.66284	2.81078	0.994313		0.0581	0.292784	-0.14034	-0.0640389		0.13854	0.710972	-0.05632	-0.027188		0.0584	0.472874	-0.0651	-0.0340748		0.188625	0.964464	-0.00695	-0.00347752
	257.1	4.53934	5.64075	3.7346	0.995485		4.30526	5.22116	3.48068	0.995487		3.46358	5.00589	2.77168	0.994598		3.57755	4.66206	2.81018	0.994101		0.05976	0.301149	-0.13868	-0.0632814		0.13902	0.713435	-0.05584	-0.0269563		0.0576	0.466397	-0.0659	-0.0344936		0.18845	0.963569	-0.007125	-0.00356508
	257.4	4.53838	5.63956	3.73364	0.995229		4.30476	5.22055	3.48018	0.995344		3.46318	5.00531	2.77128	0.994454		3.57793	4.66255	2.81055	0.994234		0.06122	0.308506	-0.13722	-0.0626152		0.1374	0.705122	-0.05746	-0.0277384		0.05615	0.454656	-0.06735	-0.0352526		0.188425	0.963441	-0.00715	-0.00357759
	257.7	4.53806	5.63916	3.73332	0.995143		4.30444	5.22016	3.47986	0.995252		3.46155	5.00296	2.76965	0.993871		3.57673	4.66099	2.80935	0.993809		0.06284	0.31667	-0.1356	-0.061876		0.13578	0.696808	-0.05908	-0.0285204		0.056175	0.454858	-0.067325	-0.0352395		0.18985	0.970727	-0.005725	-0.00286458
	258	4.5371	5.63797	3.73236	0.994887		4.3051	5.22096	3.48052	0.995441		3.46278	5.00473	2.77088	0.994311		3.57713	4.66151	2.80975	0.993951		0.06252	0.315057	-0.13592	-0.062022		0.13578	0.696808	-0.05908	-0.0285204		0.05615	0.454656	-0.06735	-0.0352526		0.190075	0.971878	-0.0055	-0.002752
	258.3	4.53792	5.63899	3.73318	0.995106		4.30524	5.22113	3.48066	0.995481		3.46278	5.00473	2.77088	0.994311		3.57753	4.66203	2.81015	0.994092		0.06396	0.322314	-0.13448	-0.0613649		0.13626	0.699271	-0.0586	-0.0282887		0.055175	0.446761	-0.068325	-0.0357629		0.191675	0.980059	-0.0039	-0.00195141
	258.6	4.53856	5.63978	3.73382	0.995277		4.30508	5.22094	3.4805	0.995435		3.46195	5.00354	2.77005	0.994014		3.57793	4.66255	2.81055	0.994234		0.06448	0.324934	-0.13396	-0.0611276		0.13626	0.699271	-0.0586	-0.0282887		0.0541	0.438057	-0.0694	-0.0363256		0.193725	0.990541	-0.00185	-0.000925671
	258.9	4.53756	5.63854	3.73282	0.99501		4.30476	5.22055	3.48018	0.995344		3.46295	5.00499	2.77105	0.994373		3.57753	4.66203	2.81015	0.994092		0.06252	0.315057	-0.13592	-0.062022		0.13772	0.706764	-0.05714	-0.0275839		0.057375	0.464575	-0.066125	-0.0346114		0.191275	0.978014	-0.0043	-0.00215156
	259.2	4.5382	5.63934	3.73346	0.995181		4.3054	5.22132	3.48082	0.995527		3.46195	5.00354	2.77005	0.994014		3.5761	4.66017	2.80872	0.993588		0.063	0.317476	-0.13544	-0.061803		0.13822	0.70933	-0.05664	-0.0273425		0.0568	0.459919	-0.0667	-0.0349123		0.1907	0.975074	-0.004875	-0.00243927
	259.5	4.5382	5.63934	3.73346	0.995181		4.30426	5.21994	3.47968	0.995201		3.46172	5.00322	2.76982	0.993934		3.5763	4.66043	2.80892	0.993659		0.06236	0.314251	-0.13608	-0.062095		0.13872	0.711896	-0.05614	-0.0271011		0.05635	0.456275	-0.06715	-0.0351479		0.191675	0.980059	-0.0039	-0.00195141
	259.8	4.53772	5.63874	3.73298	0.995053		4.30428	5.21997	3.4797	0.995207		3.46338	5.0056	2.77148	0.994526		3.57693	4.66125	2.80955	0.99388		0.06266	0.315763	-0.13578	-0.0619581		0.13918	0.714256	-0.05568	-0.0268791		0.058825	0.476316	-0.064675	-0.0338524		0.1925	0.984277	-0.003075	-0.00153862
	260.1	4.53706	5.63792	3.73232	0.994877		4.30428	5.21997	3.4797	0.995207		3.46215	5.00383	2.77025	0.994086		3.57713	4.66151	2.80975	0.993951		0.06464	0.325741	-0.1338	-0.0610546		0.13872	0.711896	-0.05614	-0.0271011		0.059025	0.477935	-0.064475	-0.0337477		0.193725	0.990541	-0.00185	-0.000925671
	260.4	4.53774	5.63877	3.733	0.995058		4.30394	5.21955	3.47936	0.995109		3.46215	5.00383	2.77025	0.994086		3.57713	4.66151	2.80975	0.993951		0.06578	0.331486	-0.13266	-0.0605344		0.13954	0.716104	-0.05532	-0.0267053		0.0588	0.476113	-0.0647	-0.0338655		0.19435	0.993736	-0.001225	-0.000612944
	260.7	4.53838	5.63956	3.73364	0.995229		4.30362	5.21917	3.47904	0.995018		3.46238	5.00416	2.77047	0.994167		3.5767	4.66095	2.80932	0.993801		0.06528	0.328966	-0.13316	-0.0607626		0.13918	0.714256	-0.05568	-0.0268791		0.06025	0.487854	-0.06325	-0.0331065		0.193125	0.987473	-0.00245	-0.00122589
	261	4.53692	5.63775	3.73218	0.994839		4.3046	5.22035	3.48002	0.995298		3.46195	5.00354	2.77005	0.994014		3.57815	4.66284	2.81078	0.994313		0.06382	0.321609	-0.13462	-0.0614288		0.14018	0.719388	-0.05468	-0.0263963		0.059625	0.482794	-0.063875	-0.0334337		0.194925	0.996676	-0.00065	-0.000325236
	261.3	4.5374	5.63834	3.73266	0.994967		4.30344	5.21895	3.47886	0.994966		3.46335	5.00556	2.77145	0.994517		3.57653	4.66073	2.80915	0.993739		0.06464	0.325741	-0.1338	-0.0610546		0.13884	0.712512	-0.05602	-0.0270432		0.06065	0.491093	-0.06285	-0.0328971		0.19535	0.99885	-0.000225	-0.000112582
	261.6	4.53722	5.63812	3.73248	0.994919		4.3038	5.21938	3.47922	0.995069		3.46195	5.00354	2.77005	0.994014		3.57693	4.66125	2.80955	0.99388		0.0643	0.324027	-0.13414	-0.0612098		0.13904	0.713538	-0.05582	-0.0269467		0.06085	0.492713	-0.06265	-0.0327925		0.197	1.00729	0.001425	0.000713017
	261.9	4.53806	5.63916	3.73332	0.995143		4.30362	5.21917	3.47904	0.995018		3.46255	5.00441	2.77065	0.99423		3.5767	4.66095	2.80932	0.993801		0.06364	0.320701	-0.1348	-0.0615109		0.14128	0.725033	-0.05358	-0.0258653		0.061225	0.495749	-0.062275	-0.0325962		0.196975	1.00716	0.0014	0.000700508
	262.2	4.53662	5.63737	3.73188	0.994759		4.30314	5.21858	3.47856	0.994881		3.46195	5.00354	2.77005	0.994014		3.57693	4.66125	2.80955	0.99388		0.06514	0.32826	-0.1333	-0.0608265		0.14018	0.719388	-0.05468	-0.0263963		0.06125	0.495951	-0.06225	-0.0325831		0.196375	1.00409	0.0008	0.00040029
	262.5	4.5374	5.63834	3.73266	0.994967		4.30312	5.21856	3.47854	0.994875		3.46172	5.00322	2.76982	0.993934		3.5755	4.65939	2.80812	0.993376		0.06756	0.340456	-0.13088	-0.0597222		0.13886	0.712614	-0.056	-0.0270336		0.06125	0.495951	-0.06225	-0.0325831		0.19535	0.99885	-0.000225	-0.000112582
	262.8	4.5374	5.63834	3.73266	0.994967		4.30296	5.21837	3.47838	0.994829		3.46275	5.0047	2.77085	0.994302		3.57673	4.66099	2.80935	0.993809		0.06888	0.347107	-0.12956	-0.0591199		0.1395	0.715899	-0.05536	-0.0267246		0.0631	0.510931	-0.0604	-0.0316148		0.19575	1.00089	0.000175	8.75635e-05
	263.1	4.53692	5.63775	3.73218	0.994839		4.30344	5.21895	3.47886	0.994966		3.46238	5.00416	2.77047	0.994167		3.5763	4.66043	2.80892	0.993659		0.06724	0.338843	-0.1312	-0.0598682		0.13954	0.716104	-0.05532	-0.0267053		0.062475	0.50587	-0.061025	-0.0319419		0.19555	0.999872	-2.5e-05	-1.25091e-05
	263.4	4.53772	5.63874	3.73298	0.995053		4.30314	5.21858	3.47856	0.994881		3.46157	5.003	2.76967	0.99388		3.5757	4.65965	2.80832	0.993447		0.06758	0.340556	-0.13086	-0.0597131		0.1392	0.714359	-0.05566	-0.0268694		0.06285	0.508907	-0.06065	-0.0317456		0.19475	0.995782	-0.000825	-0.000412799
	263.7	4.53708	5.63795	3.73234	0.994882		4.30394	5.21955	3.47936	0.995109		3.46157	5.003	2.76967	0.99388		3.5763	4.66043	2.80892	0.993659		0.06706	0.337936	-0.13138	-0.0599504		0.13872	0.711896	-0.05614	-0.0271011		0.062475	0.50587	-0.061025	-0.0319419		0.195975	1.00205	0.0004	0.000200145
	264	4.53708	5.63795	3.73234	0.994882		4.30262	5.21795	3.47804	0.994732		3.46135	5.00267	2.76945	0.993799		3.5755	4.65939	2.80812	0.993376		0.06758	0.340556	-0.13086	-0.0597131		0.1384	0.710254	-0.05646	-0.0272556		0.06245	0.505668	-0.06105	-0.031955		0.19595	1.00192	0.000375	0.000187636
	264.3	4.53692	5.63775	3.73218	0.994839		4.30296	5.21837	3.47838	0.994829		3.46093	5.00206	2.76903	0.993647		3.57587	4.65988	2.8085	0.993509		0.06692	0.33723	-0.13152	-0.0600142		0.14	0.718465	-0.05486	-0.0264832		0.060225	0.487652	-0.063275	-0.0331196		0.196175	1.00307	0.0006	0.000300218
	264.6	4.53642	5.63713	3.73168	0.994706		4.30378	5.21936	3.4792	0.995064		3.46238	5.00416	2.77047	0.994167		3.57675	4.66102	2.80938	0.993818		0.06624	0.333804	-0.1322	-0.0603245		0.1423	0.730268	-0.05256	-0.0253729		0.060625	0.490891	-0.062875	-0.0329102		0.197175	1.00818	0.0016	0.00080058
	264.9	4.53678	5.63757	3.73204	0.994802		4.30234	5.21761	3.47776	0.994652		3.46135	5.00267	2.76945	0.993799		3.5761	4.66017	2.80872	0.993588		0.06642	0.334711	-0.13202	-0.0602424		0.14082	0.722673	-0.05404	-0.0260874		0.059425	0.481174	-0.064075	-0.0335383		0.19515	0.997827	-0.000425	-0.000212654
	265.2	4.53738	5.63832	3.73264	0.994962		4.30394	5.21955	3.47936	0.995109		3.46172	5.00322	2.76982	0.993934		3.57852	4.66333	2.81115	0.994446		0.06626	0.333904	-0.13218	-0.0603154		0.1392	0.714359	-0.05566	-0.0268694		0.0619	0.501215	-0.0616	-0.0322429		0.196575	1.00511	0.001	0.000500363
	265.5	4.53478	5.63509	3.73004	0.994269		4.30282	5.2182	3.47824	0.994789		3.4605	5.00145	2.7686	0.993494		3.57547	4.65936	2.8081	0.993367		0.06562	0.330679	-0.13282	-0.0606074		0.13854	0.710972	-0.05632	-0.027188		0.06145	0.497571	-0.06205	-0.0324784		0.195175	0.997955	-0.0004	-0.000200145
	265.8	4.53754	5.63852	3.7328	0.995005		4.3033	5.21878	3.47872	0.994926		3.46113	5.00235	2.76923	0.993718		3.5759	4.65991	2.80852	0.993518		0.06756	0.340456	-0.13088	-0.0597222		0.13952	0.716001	-0.05534	-0.0267149		0.063075	0.510729	-0.060425	-0.0316278		0.196375	1.00409	0.0008	0.00040029
	266.1	4.53608	5.6367	3.73134	0.994616		4.30314	5.21858	3.47856	0.994881		3.46155	5.00296	2.76965	0.993871		3.5761	4.66017	2.80872	0.993588		0.06626	0.333904	-0.13218	-0.0603154		0.13984	0.717643	-0.05502	-0.0265605		0.0649	0.525506	-0.0586	-0.0306726		0.195775	1.00102	0.0002	0.000100073
	266.4	4.53594	5.63653	3.7312	0.994578		4.30218	5.21742	3.4776	0.994606		3.46115	5.00238	2.76925	0.993727		3.57653	4.66073	2.80915	0.993739		0.06612	0.333199	-0.13232	-0.0603793		0.14132	0.725239	-0.05354	-0.025846		0.066925	0.541903	-0.056575	-0.0296127		0.194975	0.996932	-0.0006	-0.000300218
	266.7	4.53708	5.63795	3.73234	0.994882		4.30184	5.21701	3.47726	0.994509		3.46053	5.00148	2.76863	0.993503		3.57527	4.6591	2.8079	0.993296		0.06546	0.329873	-0.13298	-0.0606805		0.14084	0.722775	-0.05402	-0.0260777		0.06735	0.545344	-0.05615	-0.0293902		0.193125	0.987473	-0.00245	-0.00122589
	267	4.53626	5.63693	3.73152	0.994664		4.302	5.2172	3.47742	0.994554		3.4607	5.00173	2.7688	0.993566		3.57633	4.66047	2.80895	0.993668		0.06364	0.320701	-0.1348	-0.0615109		0.1423	0.730268	-0.05256	-0.0253729		0.06595	0.534008	-0.05755	-0.030123		0.19395	0.991691	-0.001625	-0.000813089
	267.3	4.53676	5.63755	3.73202	0.994797		4.30118	5.21621	3.4766	0.99432		3.46135	5.00267	2.76945	0.993799		3.57552	4.65942	2.80815	0.993385		0.06464	0.325741	-0.1338	-0.0610546		0.14326	0.735194	-0.0516	-0.0249095		0.06755	0.546964	-0.05595	-0.0292855		0.194175	0.992842	-0.0014	-0.000700508
	267.6	4.53612	5.63675	3.73138	0.994626		4.3015	5.2166	3.47692	0.994411		3.46053	5.00148	2.76863	0.993503		3.5745	4.65809	2.80713	0.993022		0.064	0.322516	-0.13444	-0.0613467		0.1413	0.725136	-0.05356	-0.0258557		0.06475	0.524291	-0.05875	-0.0307511		0.19495	0.996804	-0.000625	-0.000312727
	267.9	4.5356	5.63611	3.73086	0.994488		4.30264	5.21798	3.47806	0.994738		3.46113	5.00235	2.76923	0.993718		3.57428	4.65779	2.8069	0.992943		0.06478	0.326446	-0.13366	-0.0609907		0.14148	0.72606	-0.05338	-0.0257688		0.0651	0.527126	-0.0584	-0.0305679		0.1968	1.00626	0.001225	0.000612944
	268.2	4.53692	5.63775	3.73218	0.994839		4.30182	5.21698	3.47724	0.994503		3.46053	5.00148	2.76863	0.993503		3.57385	4.65724	2.80647	0.992792		0.06642	0.334711	-0.13202	-0.0602424		0.13904	0.713538	-0.05582	-0.0269467		0.065525	0.530567	-0.057975	-0.0303455		0.199025	1.01764	0.00345	0.00172625
	268.5	4.5361	5.63673	3.73136	0.994621		4.30214	5.21737	3.47756	0.994595		3.4605	5.00145	2.7686	0.993494		3.57388	4.65727	2.8065	0.992801		0.06544	0.329772	-0.133	-0.0606896		0.14116	0.724418	-0.0537	-0.0259232		0.063475	0.513968	-0.060025	-0.0314185		0.20045	1.02493	0.004875	0.00243927
	268.8	4.5371	5.63797	3.73236	0.994887		4.3025	5.21781	3.47792	0.994697		3.4607	5.00173	2.7688	0.993566		3.57428	4.65779	2.8069	0.992943		0.06594	0.332292	-0.1325	-0.0604614		0.14294	0.733552	-0.05192	-0.025064		0.061475	0.497773	-0.062025	-0.0324653		0.199425	1.01969	0.00385	0.0019264
	269.1	4.53592	5.6365	3.73118	0.994573		4.3025	5.21781	3.47792	0.994697		3.45907	4.99939	2.76717	0.992983		3.57388	4.65727	2.8065	0.992801		0.06236	0.314251	-0.13608	-0.062095		0.14278	0.732731	-0.05208	-0.0251412		0.060025	0.486032	-0.063475	-0.0332243		0.198	1.0124	0.002425	0.00121338
	269.4	4.53594	5.63653	3.7312	0.994578		4.30152	5.21662	3.47694	0.994417		3.46113	5.00235	2.76923	0.993718		3.57368	4.65701	2.8063	0.99273		0.0617	0.310925	-0.13674	-0.0623962		0.14132	0.725239	-0.05354	-0.025846		0.06085	0.492713	-0.06265	-0.0327925		0.1978	1.01138	0.002225	0.00111331
	269.7	4.5348	5.63511	3.73006	0.994274		4.3015	5.2166	3.47692	0.994411		3.46093	5.00206	2.76903	0.993647		3.57368	4.65701	2.8063	0.99273		0.06024	0.303568	-0.1382	-0.0630624		0.14148	0.72606	-0.05338	-0.0257688		0.063075	0.510729	-0.060425	-0.0316278		0.197175	1.00818	0.0016	0.00080058
	270	4.53594	5.63653	3.7312	0.994578		4.30166	5.21679	3.47708	0.994457		3.46033	5.00119	2.76843	0.993431		3.57307	4.65623	2.8057	0.992518		0.06236	0.314251	-0.13608	-0.062095		0.14148	0.72606	-0.05338	-0.0257688		0.0653	0.528745	-0.0582	-0.0304632		0.195975	1.00205	0.0004	0.000200145
	270.3	4.53546	5.63593	3.73072	0.99445		4.30068	5.2156	3.4761	0.994177		3.46053	5.00148	2.76863	0.993503		3.57307	4.65623	2.8057	0.992518		0.06104	0.307599	-0.1374	-0.0626974		0.14098	0.723494	-0.05388	-0.0260101		0.06595	0.534008	-0.05755	-0.030123		0.196375	1.00409	0.0008	0.00040029
	270.6	4.53576	5.6363	3.73102	0.99453		4.30152	5.21662	3.47694	0.994417		3.46135	5.00267	2.76945	0.993799		3.57428	4.65779	2.8069	0.992943		0.06298	0.317376	-0.13546	-0.0618121		0.1405	0.72103	-0.05436	-0.0262419		0.065925	0.533806	-0.057575	-0.0301361		0.195575	1	0	0
	270.9	4.5366	5.63735	3.73186	0.994754		4.3007	5.21562	3.47612	0.994183		3.4595	5	2.7676	0.993135		3.57328	4.65649	2.8059	0.992589		0.0661	0.333098	-0.13234	-0.0603884		0.13986	0.717746	-0.055	-0.0265508		0.065325	0.528947	-0.058175	-0.0304501		0.19375	0.990669	-0.001825	-0.000913162
	271.2	4.53418	5.63434	3.72944	0.994109		4.30102	5.21601	3.47644	0.994274		3.4597	5.00029	2.7678	0.993207		3.57428	4.65779	2.8069	0.992943		0.0656	0.330579	-0.13284	-0.0606166		0.14228	0.730165	-0.05258	-0.0253826		0.067775	0.548785	-0.055725	-0.0291678		0.19395	0.991691	-0.001625	-0.000813089
	271.5	4.53482	5.63514	3.73008	0.99428		4.30054	5.21543	3.47596	0.994137		3.45947	4.99996	2.76757	0.993126		3.57388	4.65727	2.8065	0.992801		0.06562	0.330679	-0.13282	-0.0606074		0.14052	0.721133	-0.05434	-0.0262322		0.06755	0.546964	-0.05595	-0.0292855		0.19375	0.990669	-0.001825	-0.000913162
	271.8	4.5348	5.63511	3.73006	0.994274		4.30118	5.21621	3.4766	0.99432		3.4603	5.00116	2.7684	0.993422		3.57388	4.65727	2.8065	0.992801		0.06658	0.335517	-0.13186	-0.0601694		0.13952	0.716001	-0.05534	-0.0267149		0.0692	0.560324	-0.0543	-0.0284219		0.195775	1.00102	0.0002	0.000100073
	272.1	4.53366	5.6337	3.72892	0.99397		4.30134	5.2164	3.47676	0.994366		3.46033	5.00119	2.76843	0.993431		3.57348	4.65675	2.8061	0.99266		0.06738	0.339548	-0.13106	-0.0598043		0.13886	0.712614	-0.056	-0.0270336		0.067775	0.548785	-0.055725	-0.0291678		0.19535	0.99885	-0.000225	-0.000112582
	272.4	4.53494	5.63529	3.7302	0.994312		4.29986	5.21461	3.47528	0.993942		3.4595	5	2.7676	0.993135		3.5735	4.65678	2.80613	0.992669		0.06806	0.342975	-0.13038	-0.059494		0.1382	0.709227	-0.05666	-0.0273522		0.0645	0.522267	-0.059	-0.030882		0.19395	0.991691	-0.001625	-0.000813089
	272.7	4.53594	5.63653	3.7312	0.994578		4.30152	5.21662	3.47694	0.994417		3.45993	5.00061	2.76803	0.993288		3.57345	4.65672	2.80607	0.992651		0.07068	0.356178	-0.12776	-0.0582985		0.1392	0.714359	-0.05566	-0.0268694		0.065725	0.532186	-0.057775	-0.0302408		0.1923	0.983255	-0.003275	-0.00163869
	273	4.53626	5.63693	3.73152	0.994664		4.30052	5.21541	3.47594	0.994131		3.4593	4.99971	2.7674	0.993064		3.57287	4.65597	2.8055	0.992447		0.07	0.352751	-0.12844	-0.0586088		0.13968	0.716822	-0.05518	-0.0266377		0.066525	0.538664	-0.056975	-0.029822		0.192325	0.983382	-0.00325	-0.00162618
	273.3	4.5366	5.63735	3.73186	0.994754		4.30004	5.21482	3.47546	0.993994		3.45847	4.99852	2.76658	0.992768		3.57305	4.6562	2.80567	0.992509		0.07032	0.354364	-0.12812	-0.0584628		0.1405	0.72103	-0.05436	-0.0262419		0.0647	0.523887	-0.0588	-0.0307773		0.1909	0.976096	-0.004675	-0.0023392
	273.6	4.53578	5.63633	3.73104	0.994536		4.30038	5.21524	3.4758	0.994091		3.45933	4.99975	2.76742	0.993073		3.57305	4.6562	2.80567	0.992509		0.06904	0.347914	-0.1294	-0.0590469		0.14228	0.730165	-0.05258	-0.0253826		0.0641	0.519028	-0.0594	-0.0310913		0.1919	0.981209	-0.003675	-0.00183883
	273.9	4.53544	5.63591	3.7307	0.994445		4.3002	5.21502	3.47562	0.99404		3.45933	4.99975	2.76742	0.993073		3.57325	4.65646	2.80587	0.99258		0.06722	0.338742	-0.13122	-0.0598773		0.14276	0.732629	-0.0521	-0.0251509		0.064925	0.525709	-0.058575	-0.0306595		0.193925	0.991563	-0.00165	-0.000825599
	274.2	4.534	5.63412	3.72926	0.994061		4.3002	5.21502	3.47562	0.99404		3.4591	4.99942	2.7672	0.992992		3.57287	4.65597	2.8055	0.992447		0.06642	0.334711	-0.13202	-0.0602424		0.14326	0.735194	-0.0516	-0.0249095		0.064725	0.524089	-0.058775	-0.0307642		0.19595	1.00192	0.000375	0.000187636
	274.5	4.53368	5.63372	3.72894	0.993976		4.29954	5.21422	3.47496	0.993851		3.4603	5.00116	2.7684	0.993422		3.57285	4.65594	2.80547	0.992439		0.06562	0.330679	-0.13282	-0.0606074		0.14472	0.742687	-0.05014	-0.0242047		0.065525	0.530567	-0.057975	-0.0303455		0.196775	1.00614	0.0012	0.000600435
	274.8	4.53562	5.63613	3.73088	0.994493		4.2997	5.21441	3.47512	0.993897		3.4595	5	2.7676	0.993135		3.57242	4.65538	2.80505	0.992288		0.06786	0.341967	-0.13058	-0.0595853		0.14538	0.746074	-0.04948	-0.0238861		0.0643	0.520648	-0.0592	-0.0309867		0.19575	1.00089	0.000175	8.75635e-05
	275.1	4.53528	5.63571	3.73054	0.994402		4.2989	5.21344	3.47432	0.993668		3.4581	4.99798	2.7662	0.992633		3.57305	4.6562	2.80567	0.992509		0.0666	0.335618	-0.13184	-0.0601603		0.1436	0.736939	-0.05126	-0.0247454		0.061875	0.501012	-0.061625	-0.032256		0.196575	1.00511	0.001	0.000500363
	275.4	4.53756	5.63854	3.73282	0.99501		4.29974	5.21446	3.47516	0.993908		3.4595	5	2.7676	0.993135		3.57348	4.65675	2.8061	0.99266		0.07034	0.354465	-0.1281	-0.0584536		0.14378	0.737863	-0.05108	-0.0246585		0.0639	0.517409	-0.0596	-0.031196		0.1982	1.01342	0.002625	0.00131345
	275.7	4.53414	5.63429	3.7294	0.994098		4.29888	5.21342	3.4743	0.993662		3.45728	4.99678	2.76538	0.992337		3.57328	4.65649	2.8059	0.992589		0.06756	0.340456	-0.13088	-0.0597222		0.14262	0.73191	-0.05224	-0.0252184		0.0641	0.519028	-0.0594	-0.0310913		0.1974	1.00933	0.001825	0.000913162
	276	4.53544	5.63591	3.7307	0.994445		4.30006	5.21485	3.47548	0.994		3.45748	4.99707	2.76558	0.992409		3.57408	4.65753	2.8067	0.992872		0.06774	0.341363	-0.1307	-0.0596401		0.14456	0.741866	-0.0503	-0.0242819		0.0637	0.515789	-0.0598	-0.0313007		0.20005	1.02288	0.004475	0.00223912
	276.3	4.53414	5.63429	3.7294	0.994098		4.29972	5.21444	3.47514	0.993902		3.45625	4.9953	2.76435	0.991969		3.57245	4.65542	2.80507	0.992297		0.0661	0.333098	-0.13234	-0.0603884		0.14554	0.746895	-0.04932	-0.0238088		0.064325	0.52085	-0.059175	-0.0309736		0.20045	1.02493	0.004875	0.00243927
	276.6	4.53202	5.63166	3.72728	0.993533		4.29922	5.21383	3.47464	0.993759		3.45768	4.99736	2.76578	0.99248		3.57348	4.65675	2.8061	0.99266		0.06496	0.327353	-0.13348	-0.0609086		0.14556	0.746998	-0.0493	-0.0237992		0.065925	0.533806	-0.057575	-0.0301361		0.20045	1.02493	0.004875	0.00243927
	276.9	4.53318	5.6331	3.72844	0.993843		4.2994	5.21405	3.47482	0.993811		3.45887	4.9991	2.76697	0.992911		3.57307	4.65623	2.8057	0.992518		0.06546	0.329873	-0.13298	-0.0606805		0.14376	0.73776	-0.0511	-0.0246681		0.06615	0.535628	-0.05735	-0.0300183		0.201475	1.03017	0.0059	0.00295214
	277.2	4.53316	5.63307	3.72842	0.993837		4.2994	5.21405	3.47482	0.993811		3.4595	5	2.7676	0.993135		3.57105	4.65359	2.80368	0.991802		0.06496	0.327353	-0.13348	-0.0609086		0.14312	0.734476	-0.05174	-0.0249771		0.066325	0.537045	-0.057175	-0.0299267		0.200425	1.0248	0.00485	0.00242676
	277.5	4.53316	5.63307	3.72842	0.993837		4.29942	5.21407	3.47484	0.993817		3.4593	4.99971	2.7674	0.993064		3.5712	4.65379	2.80382	0.991855		0.0656	0.330579	-0.13284	-0.0606166		0.14262	0.73191	-0.05224	-0.0252184		0.064725	0.524089	-0.058775	-0.0307642		0.201675	1.03119	0.0061	0.00305221
	277.8	4.53348	5.63347	3.72874	0.993922		4.29808	5.21245	3.4735	0.993433		3.4587	4.99884	2.7668	0.992848		3.57105	4.65359	2.80368	0.991802		0.06592	0.332191	-0.13252	-0.0604705		0.14328	0.735297	-0.05158	-0.0248998		0.06555	0.530769	-0.05795	-0.0303324		0.20105	1.02799	0.005475	0.00273949
	278.1	4.53332	5.63327	3.72858	0.99388		4.29906	5.21364	3.47448	0.993714		3.45827	4.99823	2.76638	0.992696		3.57205	4.65489	2.80468	0.992156		0.06448	0.324934	-0.13396	-0.0611276		0.14456	0.741866	-0.0503	-0.0242819		0.0651	0.527126	-0.0584	-0.0305679		0.201075	1.02812	0.0055	0.002752
	278.4	4.53122	5.63066	3.72648	0.99332		4.29874	5.21325	3.47416	0.993622		3.45788	4.99765	2.76598	0.992552		3.57105	4.65359	2.80368	0.991802		0.06204	0.312639	-0.1364	-0.062241		0.14226	0.730063	-0.0526	-0.0253922		0.065525	0.530567	-0.057975	-0.0303455		0.201875	1.03221	0.0063	0.00315229
	278.7	4.533	5.63288	3.72826	0.993795		4.29858	5.21305	3.474	0.993576		3.45827	4.99823	2.76638	0.992696		3.57143	4.65408	2.80405	0.991934		0.06366	0.320802	-0.13478	-0.0615018		0.14426	0.740326	-0.0506	-0.0244267		0.066325	0.537045	-0.057175	-0.0299267		0.204325	1.04474	0.00875	0.00437817
	279	4.53318	5.6331	3.72844	0.993843		4.29842	5.21286	3.47384	0.993531		3.45953	5.00004	2.76762	0.993144		3.57165	4.65437	2.80428	0.992014		0.06414	0.323221	-0.1343	-0.0612828		0.14278	0.732731	-0.05208	-0.0251412		0.06655	0.538866	-0.05695	-0.029809		0.2035	1.04052	0.007925	0.00396537
	279.3	4.53318	5.6331	3.72844	0.993843		4.29858	5.21305	3.474	0.993576		3.45827	4.99823	2.76638	0.992696		3.57123	4.65382	2.80385	0.991864		0.06596	0.332393	-0.13248	-0.0604523		0.14278	0.732731	-0.05208	-0.0251412		0.0647	0.523887	-0.0588	-0.0307773		0.20105	1.02799	0.005475	0.00273949
	279.6	4.53266	5.63245	3.72792	0.993704		4.29824	5.21264	3.47366	0.993479		3.4585	4.99855	2.7666	0.992776		3.57125	4.65385	2.80388	0.991873		0.06674	0.336323	-0.1317	-0.0600964		0.14194	0.72842	-0.05292	-0.0255467		0.068	0.550607	-0.0555	-0.02905		0.197775	1.01125	0.0022	0.0011008
	279.9	4.53332	5.63327	3.72858	0.99388		4.2981	5.21247	3.47352	0.993439		3.45768	4.99736	2.76578	0.99248		3.57203	4.65486	2.80465	0.992147		0.06902	0.347813	-0.12942	-0.059056		0.14294	0.733552	-0.05192	-0.025064		0.0651	0.527126	-0.0584	-0.0305679		0.197575	1.01023	0.002	0.00100073
	280.2	4.53364	5.63367	3.7289	0.993965		4.29856	5.21303	3.47398	0.993571		3.4575	4.99711	2.7656	0.992418		3.57185	4.65463	2.80448	0.992085		0.069	0.347712	-0.12944	-0.0590651		0.14374	0.737658	-0.05112	-0.0246778		0.064125	0.519231	-0.059375	-0.0310783		0.1976	1.01035	0.002025	0.00101323
	280.5	4.53384	5.63392	3.7291	0.994018		4.29774	5.21204	3.47316	0.993336		3.45808	4.99794	2.76618	0.992624		3.57185	4.65463	2.80448	0.992085		0.06952	0.350333	-0.12892	-0.0588278		0.14294	0.733552	-0.05192	-0.025064		0.063525	0.514372	-0.059975	-0.0313923		0.198625	1.0156	0.00305	0.00152611
	280.8	4.53202	5.63166	3.72728	0.993533		4.29872	5.21322	3.47414	0.993616		3.45607	4.99505	2.76417	0.991906		3.57083	4.6533	2.80345	0.991722		0.06984	0.351945	-0.1286	-0.0586818		0.1423	0.730268	-0.05256	-0.0253729		0.062075	0.502632	-0.061425	-0.0321513		0.198425	1.01457	0.00285	0.00142603
	281.1	4.5335	5.6335	3.72876	0.993928		4.29774	5.21204	3.47316	0.993336		3.45648	4.99563	2.76457	0.99205		3.56997	4.65219	2.8026	0.991422		0.07344	0.370087	-0.125	-0.0570391		0.14244	0.730986	-0.05242	-0.0253053		0.06225	0.504049	-0.06125	-0.0320597		0.197775	1.01125	0.0022	0.0011008
	281.4	4.53254	5.6323	3.7278	0.993672		4.29824	5.21264	3.47366	0.993479		3.4579	4.99769	2.766	0.992561		3.57183	4.6546	2.80445	0.992076		0.07148	0.36021	-0.12696	-0.0579335		0.1452	0.74515	-0.04966	-0.023973		0.065325	0.528947	-0.058175	-0.0304501		0.20025	1.0239	0.004675	0.0023392
	281.7	4.53414	5.63429	3.7294	0.994098		4.2976	5.21187	3.47302	0.993296		3.45625	4.9953	2.76435	0.991969		3.57143	4.65408	2.80405	0.991934		0.07066	0.356077	-0.12778	-0.0583076		0.14554	0.746895	-0.04932	-0.0238088		0.0639	0.517409	-0.0596	-0.031196		0.20065	1.02595	0.005075	0.00253934
	282	4.533	5.63288	3.72826	0.993795		4.29822	5.21262	3.47364	0.993473		3.45665	4.99588	2.76475	0.992113		3.571	4.65353	2.80362	0.991784		0.07132	0.359403	-0.12712	-0.0580065		0.14506	0.744432	-0.0498	-0.0240406		0.064125	0.519231	-0.059375	-0.0310783		0.20165	1.03106	0.006075	0.0030397
	282.3	4.53318	5.6331	3.72844	0.993843		4.29808	5.21245	3.4735	0.993433		3.45748	4.99707	2.76558	0.992409		3.57083	4.6533	2.80345	0.991722		0.07244	0.365047	-0.126	-0.0574954		0.14458	0.741969	-0.05028	-0.0242723		0.06615	0.535628	-0.05735	-0.0300183		0.202475	1.03528	0.0069	0.0034525
	282.6	4.53204	5.63168	3.7273	0.993539		4.29808	5.21245	3.4735	0.993433		3.45525	4.99386	2.76335	0.99161		3.5702	4.65248	2.80282	0.991501		0.0726	0.365854	-0.12584	-0.0574224		0.14506	0.744432	-0.0498	-0.0240406		0.064925	0.525709	-0.058575	-0.0306595		0.2033	1.0395	0.007725	0.0038653
	282.9	4.53284	5.63268	3.7281	0.993752		4.29726	5.21145	3.47268	0.993199		3.45688	4.99621	2.76498	0.992193		3.57123	4.65382	2.80385	0.991864		0.07246	0.365148	-0.12598	-0.0574863		0.14572	0.747819	-0.04914	-0.0237219		0.06815	0.551822	-0.05535	-0.0289715		0.20635	1.05509	0.010775	0.00539141
	283.2	4.53236	5.63208	3.72762	0.993624		4.2971	5.21126	3.47252	0.993153		3.45728	4.99678	2.76538	0.992337		3.57023	4.65252	2.80285	0.99151		0.07292	0.367466	-0.12552	-0.0572764		0.1457	0.747716	-0.04916	-0.0237316		0.06755	0.546964	-0.05595	-0.0292855		0.207775	1.06238	0.0122	0.00610443
	283.5	4.53252	5.63228	3.72778	0.993667		4.2979	5.21223	3.47332	0.993382		3.45705	4.99646	2.76515	0.992256		3.57057	4.65297	2.8032	0.991634		0.0741	0.373413	-0.12434	-0.0567379		0.14782	0.758596	-0.04704	-0.0227082		0.06775	0.548583	-0.05575	-0.0291808		0.206125	1.05394	0.01055	0.00527883
	283.8	4.53302	5.6329	3.72828	0.9938		4.29806	5.21242	3.47348	0.993428		3.45788	4.99765	2.76598	0.992552		3.56997	4.65219	2.8026	0.991422		0.0731	0.368373	-0.12534	-0.0571942		0.14766	0.757775	-0.0472	-0.0227854		0.06775	0.548583	-0.05575	-0.0291808		0.204525	1.04576	0.00895	0.00447825
	284.1	4.53124	5.63069	3.7265	0.993325		4.29694	5.21107	3.47236	0.993107		3.45645	4.99559	2.76455	0.992041		3.57017	4.65245	2.8028	0.991492		0.07066	0.356077	-0.12778	-0.0583076		0.1465	0.751822	-0.04836	-0.0233454		0.06635	0.537247	-0.05715	-0.0299136		0.202475	1.03528	0.0069	0.0034525
	284.4	4.52988	5.629	3.72514	0.992963		4.29806	5.21242	3.47348	0.993428		3.45688	4.99621	2.76498	0.992193		3.5704	4.65274	2.80302	0.991572		0.07326	0.36918	-0.12518	-0.0571212		0.1454	0.746177	-0.04946	-0.0238764		0.06795	0.550202	-0.05555	-0.0290762		0.20065	1.02595	0.005075	0.00253934
	284.7	4.53268	5.63248	3.72794	0.993709		4.29646	5.21048	3.47188	0.99297		3.45788	4.99765	2.76598	0.992552		3.57083	4.6533	2.80345	0.991722		0.07408	0.373312	-0.12436	-0.056747		0.1431	0.734373	-0.05176	-0.0249867		0.066925	0.541903	-0.056575	-0.0296127		0.202075	1.03324	0.0065	0.00325236
	285	4.53186	5.63146	3.72712	0.993491		4.29644	5.21046	3.47186	0.992964		3.45748	4.99707	2.76558	0.992409		3.56937	4.65141	2.802	0.991209		0.07148	0.36021	-0.12696	-0.0579335		0.14426	0.740326	-0.0506	-0.0244267		0.06595	0.534008	-0.05755	-0.030123		0.201675	1.03119	0.0061	0.00305221
	285.3	4.53464	5.63491	3.7299	0.994232		4.29612	5.21007	3.47154	0.992873		3.45728	4.99678	2.76538	0.992337		3.5696	4.6517	2.80222	0.991289		0.07212	0.363435	-0.12632	-0.0576414		0.14456	0.741866	-0.0503	-0.0242819		0.065925	0.533806	-0.057575	-0.0301361		0.20125	1.02902	0.005675	0.00283956
	285.6	4.53204	5.63168	3.7273	0.993539		4.29694	5.21107	3.47236	0.993107		3.45808	4.99794	2.76618	0.992624		3.57	4.65222	2.80262	0.99143		0.06902	0.347813	-0.12942	-0.059056		0.14652	0.751924	-0.04834	-0.0233357		0.066325	0.537045	-0.057175	-0.0299267		0.201275	1.02914	0.0057	0.00285207
	285.9	4.5353	5.63573	3.73056	0.994408		4.29614	5.21009	3.47156	0.992879		3.45685	4.99617	2.76495	0.992184		3.57	4.65222	2.80262	0.99143		0.06936	0.349526	-0.12908	-0.0589008		0.14702	0.75449	-0.04784	-0.0230944		0.064925	0.525709	-0.058575	-0.0306595		0.201475	1.03017	0.0059	0.00295214
	286.2	4.53284	5.63268	3.7281	0.993752		4.29662	5.21068	3.47204	0.993016		3.45483	4.99324	2.76293	0.991458		3.5706	4.65301	2.80322	0.991643		0.06578	0.331486	-0.13266	-0.0605344		0.14702	0.75449	-0.04784	-0.0230944		0.066125	0.535425	-0.057375	-0.0300314		0.20165	1.03106	0.006075	0.0030397
	286.5	4.53252	5.63228	3.72778	0.993667		4.29516	5.20891	3.47058	0.992598		3.45585	4.99472	2.76395	0.991826		3.56898	4.65089	2.8016	0.991068		0.06658	0.335517	-0.13186	-0.0601694		0.14702	0.75449	-0.04784	-0.0230944		0.067575	0.547166	-0.055925	-0.0292724		0.202675	1.0363	0.0071	0.00355258
	286.8	4.53234	5.63206	3.7276	0.993619		4.29596	5.20988	3.47138	0.992827		3.45645	4.99559	2.76455	0.992041		3.56858	4.65037	2.8012	0.990926		0.06594	0.332292	-0.1325	-0.0604614		0.14684	0.753567	-0.04802	-0.0231813		0.06555	0.530769	-0.05795	-0.0303324		0.203125	1.0386	0.00755	0.00377774
	287.1	4.53332	5.63327	3.72858	0.99388		4.29582	5.20971	3.47124	0.992787		3.45728	4.99678	2.76538	0.992337		3.56977	4.65193	2.8024	0.991351		0.06806	0.342975	-0.13038	-0.059494		0.1462	0.750282	-0.04866	-0.0234902		0.06715	0.543725	-0.05635	-0.0294949		0.20595	1.05305	0.010375	0.00519126
	287.4	4.53284	5.63268	3.7281	0.993752		4.29516	5.20891	3.47058	0.992598		3.45685	4.99617	2.76495	0.992184		3.5686	4.6504	2.80123	0.990935		0.06886	0.347007	-0.12958	-0.059129		0.14798	0.759417	-0.04688	-0.0226309		0.065725	0.532186	-0.057775	-0.0302408		0.2043	1.04461	0.008725	0.00436567
	287.7	4.53284	5.63268	3.7281	0.993752		4.29646	5.21048	3.47188	0.99297		3.45562	4.9944	2.76372	0.991745		3.56898	4.65089	2.8016	0.991068		0.06884	0.346906	-0.1296	-0.0591381		0.1483	0.761059	-0.04656	-0.0224765		0.066325	0.537045	-0.057175	-0.0299267		0.203925	1.04269	0.00835	0.00417803
	288	4.53172	5.63128	3.72698	0.993453		4.2958	5.20968	3.47122	0.992781		3.45708	4.9965	2.76518	0.992265		3.5694	4.65144	2.80202	0.991218		0.06852	0.345293	-0.12992	-0.0592841		0.14766	0.757775	-0.0472	-0.0227854		0.069	0.558704	-0.0545	-0.0285266		0.2041	1.04359	0.008525	0.00426559
	288.3	4.53038	5.62962	3.72564	0.993096		4.29628	5.21026	3.4717	0.992919		3.45645	4.99559	2.76455	0.992041		3.56898	4.65089	2.8016	0.991068		0.07002	0.352852	-0.12842	-0.0585997		0.1475	0.756954	-0.04736	-0.0228627		0.0696	0.563563	-0.0539	-0.0282125		0.2039	1.04257	0.008325	0.00416552
	288.6	4.53172	5.63128	3.72698	0.993453		4.29566	5.20951	3.47108	0.992741		3.45587	4.99476	2.76397	0.991835		3.56957	4.65167	2.8022	0.99128		0.0705	0.355271	-0.12794	-0.0583806		0.14588	0.74864	-0.04898	-0.0236447		0.0696	0.563563	-0.0539	-0.0282125		0.20675	1.05714	0.011175	0.00559155
	288.9	4.53076	5.63009	3.72602	0.993197		4.29452	5.20813	3.46994	0.992415		3.45483	4.99324	2.76293	0.991458		3.56937	4.65141	2.802	0.991209		0.0705	0.355271	-0.12794	-0.0583806		0.14718	0.755312	-0.04768	-0.0230171		0.068375	0.553644	-0.055125	-0.0288537		0.2088	1.06762	0.013225	0.0066173
	289.2	4.5314	5.63089	3.72666	0.993368		4.29532	5.2091	3.47074	0.992644		3.45768	4.99736	2.76578	0.99248		3.56858	4.65037	2.8012	0.990926		0.07112	0.358395	-0.12732	-0.0580977		0.14848	0.761983	-0.04638	-0.0223896		0.0696	0.563563	-0.0539	-0.0282125		0.207975	1.0634	0.0124	0.0062045
	289.5	4.53074	5.63007	3.726	0.993192		4.29434	5.20791	3.46976	0.992364		3.45645	4.99559	2.76455	0.992041		3.56917	4.65115	2.8018	0.991139		0.07116	0.358597	-0.12728	-0.0580795		0.14588	0.74864	-0.04898	-0.0236447		0.06675	0.540486	-0.05675	-0.0297043		0.20735	1.06021	0.011775	0.00589177
	289.8	4.53008	5.62925	3.72534	0.993016		4.29498	5.20869	3.4704	0.992547		3.45607	4.99505	2.76417	0.991906		3.56838	4.65011	2.801	0.990856		0.07114	0.358496	-0.1273	-0.0580886		0.14636	0.751103	-0.0485	-0.023413		0.06615	0.535628	-0.05735	-0.0300183		0.20695	1.05816	0.011375	0.00569163
	290.1	4.53088	5.63024	3.72614	0.993229		4.29434	5.20791	3.46976	0.992364		3.45562	4.9944	2.76372	0.991745		3.56878	4.65063	2.8014	0.990997		0.07114	0.358496	-0.1273	-0.0580886		0.14622	0.750385	-0.04864	-0.0234806		0.06635	0.537247	-0.05715	-0.0299136		0.2088	1.06762	0.013225	0.0066173
	290.4	4.52976	5.62885	3.72502	0.992931		4.29466	5.2083	3.47008	0.992455		3.45628	4.99534	2.76437	0.991978		3.56917	4.65115	2.8018	0.991139		0.06984	0.351945	-0.1286	-0.0586818		0.14914	0.76537	-0.04572	-0.022071		0.067375	0.545547	-0.056125	-0.0293771		0.21125	1.08015	0.015675	0.00784319
	290.7	4.5304	5.62964	3.72566	0.993101		4.29336	5.20672	3.46878	0.992083		3.45562	4.9944	2.76372	0.991745		3.56878	4.65063	2.8014	0.990997		0.07148	0.36021	-0.12696	-0.0579335		0.14994	0.769476	-0.04492	-0.0216848		0.068775	0.556883	-0.054725	-0.0286443		0.210425	1.07593	0.01485	0.00743039
	291	4.53138	5.63086	3.72664	0.993363		4.2945	5.20811	3.46992	0.992409		3.45565	4.99444	2.76375	0.991754		3.56917	4.65115	2.8018	0.991139		0.07082	0.356884	-0.12762	-0.0582346		0.15254	0.782818	-0.04232	-0.0204296		0.068775	0.556883	-0.054725	-0.0286443		0.210425	1.07593	0.01485	0.00743039
	291.3	4.53172	5.63128	3.72698	0.993453		4.2945	5.20811	3.46992	0.992409		3.45585	4.99472	2.76395	0.991826		3.56858	4.65037	2.8012	0.990926		0.07164	0.361016	-0.1268	-0.0578604		0.1532	0.786205	-0.04166	-0.020111		0.06615	0.535628	-0.05735	-0.0300183		0.2104	1.0758	0.014825	0.00741788
	291.6	4.53088	5.63024	3.72614	0.993229		4.29402	5.20752	3.46944	0.992272		3.45522	4.99382	2.76333	0.991601		3.56735	4.64877	2.79997	0.990493		0.0726	0.365854	-0.12584	-0.0574224		0.15334	0.786924	-0.04152	-0.0200434		0.065325	0.528947	-0.058175	-0.0304501		0.212475	1.08641	0.0169	0.00845613
	291.9	4.53086	5.63022	3.72612	0.993224		4.29436	5.20794	3.46978	0.992369		3.45625	4.9953	2.76435	0.991969		3.56838	4.65011	2.801	0.990856		0.07392	0.372506	-0.12452	-0.05682		0.15452	0.79298	-0.04034	-0.0194738		0.064075	0.518826	-0.059425	-0.0311044		0.212475	1.08641	0.0169	0.00845613
	292.2	4.53006	5.62922	3.72532	0.993011		4.29402	5.20752	3.46944	0.992272		3.45443	4.99267	2.76253	0.991314		3.56878	4.65063	2.8014	0.990997		0.07312	0.368474	-0.12532	-0.0571851		0.15302	0.785282	-0.04184	-0.0201979		0.0623	0.504453	-0.0612	-0.0320335		0.2137	1.09268	0.018125	0.00906908
	292.5	4.53006	5.62922	3.72532	0.993011		4.29532	5.2091	3.47074	0.992644		3.45607	4.99505	2.76417	0.991906		3.56778	4.64932	2.8004	0.990643		0.07392	0.372506	-0.12452	-0.05682		0.15416	0.791132	-0.0407	-0.0196476		0.06165	0.49919	-0.06185	-0.0323737		0.2137	1.09268	0.018125	0.00906908
	292.8	4.5307	5.63002	3.72596	0.993181		4.29368	5.20711	3.4691	0.992175		3.45463	4.99295	2.76273	0.991386		3.56818	4.64985	2.8008	0.990785		0.07506	0.37825	-0.12338	-0.0562999		0.15336	0.787027	-0.0415	-0.0200338		0.062875	0.509109	-0.060625	-0.0317325		0.214925	1.09894	0.01935	0.00968202
	293.1	4.5304	5.62964	3.72566	0.993101		4.29466	5.2083	3.47008	0.992455		3.45522	4.99382	2.76333	0.991601		3.5694	4.65144	2.80202	0.991218		0.07506	0.37825	-0.12338	-0.0562999		0.15352	0.787848	-0.04134	-0.0199566		0.062675	0.50749	-0.060825	-0.0318372		0.216125	1.10507	0.02055	0.0102825
	293.4	4.52992	5.62905	3.72518	0.992974		4.29402	5.20752	3.46944	0.992272		3.45522	4.99382	2.76333	0.991601		3.56758	4.64906	2.8002	0.990573		0.07472	0.376537	-0.12372	-0.056455		0.1529	0.784666	-0.04196	-0.0202559		0.0645	0.522267	-0.059	-0.030882		0.212675	1.08743	0.0171	0.0085562
	293.7	4.52862	5.62743	3.72388	0.992627		4.29402	5.20752	3.46944	0.992272		3.45562	4.9944	2.76372	0.991745		3.56858	4.65037	2.8012	0.990926		0.0731	0.368373	-0.12534	-0.0571942		0.15386	0.789593	-0.041	-0.0197924		0.066975	0.542308	-0.056525	-0.0295865		0.2131	1.08961	0.017525	0.00876886
	294	4.52926	5.62823	3.72452	0.992798		4.29402	5.20752	3.46944	0.992272		3.45565	4.99444	2.76375	0.991754		3.56715	4.64851	2.79977	0.990422		0.07246	0.365148	-0.12598	-0.0574863		0.15692	0.805296	-0.03794	-0.0183152		0.06755	0.546964	-0.05595	-0.0292855		0.214275	1.09562	0.0187	0.00935678
	294.3	4.52974	5.62882	3.725	0.992926		4.29384	5.20731	3.46926	0.992221		3.45562	4.9944	2.76372	0.991745		3.56755	4.64903	2.80017	0.990564		0.07148	0.36021	-0.12696	-0.0579335		0.15626	0.801909	-0.0386	-0.0186338		0.06595	0.534008	-0.05755	-0.030123		0.2143	1.09574	0.018725	0.00936929
	294.6	4.53008	5.62925	3.72534	0.993016		4.2932	5.20653	3.46862	0.992038		3.45545	4.99415	2.76355	0.991682		3.56855	4.65033	2.80118	0.990917		0.07066	0.356077	-0.12778	-0.0583076		0.15546	0.797804	-0.0394	-0.01902		0.066725	0.540283	-0.056775	-0.0297174		0.2141	1.09472	0.018525	0.00926922
	294.9	4.53024	5.62945	3.7255	0.993059		4.29306	5.20636	3.46848	0.991998		3.45483	4.99324	2.76293	0.991458		3.56715	4.64851	2.79977	0.990422		0.0715	0.36031	-0.12694	-0.0579243		0.15434	0.792056	-0.04052	-0.0195607		0.067175	0.543927	-0.056325	-0.0294818		0.215325	1.10098	0.01975	0.00988216
	295.2	4.52976	5.62885	3.72502	0.992931		4.29434	5.20791	3.46976	0.992364		3.45505	4.99357	2.76315	0.991538		3.56758	4.64906	2.8002	0.990573		0.07018	0.353659	-0.12826	-0.0585267		0.15468	0.793801	-0.04018	-0.0193966		0.066125	0.535425	-0.057375	-0.0300314		0.2161	1.10495	0.020525	0.0102699
	295.5	4.53072	5.63004	3.72598	0.993187		4.2937	5.20714	3.46912	0.992181		3.4536	4.99147	2.7617	0.991018		3.56718	4.64854	2.7998	0.990431		0.07146	0.360109	-0.12698	-0.0579426		0.15336	0.787027	-0.0415	-0.0200338		0.064925	0.525709	-0.058575	-0.0306595		0.214075	1.09459	0.0185	0.00925671
	295.8	4.53026	5.62947	3.72552	0.993064		4.29354	5.20694	3.46896	0.992135		3.4534	4.99118	2.7615	0.990946		3.56715	4.64851	2.79977	0.990422		0.07064	0.355977	-0.1278	-0.0583168		0.1553	0.796982	-0.03956	-0.0190973		0.066125	0.535425	-0.057375	-0.0300314		0.214475	1.09664	0.0189	0.00945686
	296.1	4.53154	5.63106	3.7268	0.993405		4.2932	5.20653	3.46862	0.992038		3.45403	4.99209	2.76213	0.991171		3.56738	4.6488	2.8	0.990502		0.07262	0.365954	-0.12582	-0.0574133		0.15402	0.790414	-0.04084	-0.0197152		0.0649	0.525506	-0.0586	-0.0306726		0.2147	1.09779	0.019125	0.00956944
	296.4	4.52896	5.62785	3.72422	0.992718		4.29336	5.20672	3.46878	0.992083		3.45423	4.99238	2.76233	0.991242		3.56735	4.64877	2.79997	0.990493		0.07016	0.353558	-0.12828	-0.0585358		0.1535	0.787745	-0.04136	-0.0199662		0.065325	0.528947	-0.058175	-0.0304501		0.215725	1.10303	0.02015	0.0100823
	296.7	4.53106	5.63046	3.72632	0.993277		4.29286	5.20612	3.46828	0.99194		3.4538	4.99176	2.7619	0.99109		3.56655	4.64773	2.79917	0.99021		0.0718	0.361822	-0.12664	-0.0577874		0.15318	0.786103	-0.04168	-0.0201207		0.065125	0.527328	-0.058375	-0.0305548		0.216725	1.10814	0.02115	0.0105827
	297	4.5304	5.62964	3.72566	0.993101		4.29302	5.20631	3.46844	0.991986		3.4538	4.99176	2.7619	0.99109		3.56715	4.64851	2.79977	0.990422		0.07276	0.36666	-0.12568	-0.0573494		0.15318	0.786103	-0.04168	-0.0201207		0.063875	0.517206	-0.059625	-0.0312091		0.21795	1.11441	0.022375	0.0111956
	297.3	4.5273	5.62579	3.72256	0.992275		4.29222	5.20534	3.46764	0.991757		3.45463	4.99295	2.76273	0.991386		3.56575	4.64669	2.79838	0.989927		0.07086	0.357085	-0.12758	-0.0582164		0.15482	0.794519	-0.04004	-0.019329		0.0647	0.523887	-0.0588	-0.0307773		0.2153	1.10086	0.019725	0.00986966
	297.6	4.53024	5.62945	3.7255	0.993059		4.29206	5.20515	3.46748	0.991712		3.4536	4.99147	2.7617	0.991018		3.56595	4.64695	2.79858	0.989998		0.0744	0.374924	-0.12404	-0.056601		0.15498	0.79534	-0.03988	-0.0192517		0.061275	0.496154	-0.062225	-0.03257		0.213075	1.08948	0.0175	0.00875635
	297.9	4.52892	5.62781	3.72418	0.992707		4.29288	5.20614	3.4683	0.991946		3.4534	4.99118	2.7615	0.990946		3.56615	4.64721	2.79878	0.990068		0.07082	0.356884	-0.12762	-0.0582346		0.15334	0.786924	-0.04152	-0.0200434		0.0629	0.509312	-0.0606	-0.0317194		0.21305	1.08935	0.017475	0.00874384
	298.2	4.52924	5.6282	3.7245	0.992792		4.29192	5.20498	3.46734	0.991672		3.4532	4.99089	2.7613	0.990875		3.56575	4.64669	2.79838	0.989927		0.07116	0.358597	-0.12728	-0.0580795		0.1519	0.779534	-0.04296	-0.0207386		0.0627	0.507692	-0.0608	-0.0318241		0.214475	1.09664	0.0189	0.00945686
	298.5	4.52958	5.62863	3.72484	0.992883		4.29208	5.20517	3.4675	0.991717		3.4534	4.99118	2.7615	0.990946		3.56675	4.64799	2.79937	0.990281		0.07228	0.364241	-0.12616	-0.0575684		0.15174	0.778713	-0.04312	-0.0208158		0.0651	0.527126	-0.0584	-0.0305679		0.2145	1.09677	0.018925	0.00946937
	298.8	4.53106	5.63046	3.72632	0.993277		4.29208	5.20517	3.4675	0.991717		3.45443	4.99267	2.76253	0.991314		3.56615	4.64721	2.79878	0.990068		0.07374	0.371598	-0.1247	-0.0569022		0.15302	0.785282	-0.04184	-0.0201979		0.065125	0.527328	-0.058375	-0.0305548		0.2145	1.09677	0.018925	0.00946937
	299.1	4.5291	5.62803	3.72436	0.992755		4.29158	5.20456	3.467	0.991574		3.4536	4.99147	2.7617	0.991018		3.56493	4.64561	2.79755	0.989635		0.07356	0.370691	-0.12488	-0.0569843		0.15272	0.783742	-0.04214	-0.0203427		0.064925	0.525709	-0.058575	-0.0306595		0.21265	1.08731	0.017075	0.00854369
	299.4	4.52958	5.62863	3.72484	0.992883		4.29206	5.20515	3.46748	0.991712		3.4514	4.98829	2.7595	0.990229		3.56473	4.64535	2.79735	0.989564		0.07408	0.373312	-0.12436	-0.056747		0.15192	0.779637	-0.04294	-0.0207289		0.064725	0.524089	-0.058775	-0.0307642		0.21365	1.09242	0.018075	0.00904406
	299.7	4.52878	5.62763	3.72404	0.99267		4.29158	5.20456	3.467	0.991574		3.4534	4.99118	2.7615	0.990946		3.56573	4.64665	2.79835	0.989918		0.07376	0.371699	-0.12468	-0.0568931		0.15188	0.779431	-0.04298	-0.0207483		0.06535	0.52915	-0.05815	-0.0304371		0.215325	1.10098	0.01975	0.00988216
	300	4.52892	5.62781	3.72418	0.992707		4.29142	5.20437	3.46684	0.991529		3.45297	4.99057	2.76107	0.990794		3.56595	4.64695	2.79858	0.989998		0.07536	0.379762	-0.12308	-0.056163		0.15452	0.79298	-0.04034	-0.0194738		0.065125	0.527328	-0.058375	-0.0305548		0.217725	1.11326	0.02215	0.011083

## Sheet: 20th day of drought
Variable OJIP chlorophyll fluorescence from PSII and the amount of oxidized PSI primary Chl electron donor (P700+)
was simultaneously measured using a DUAL PAM-100 system (WALZ, Effeltrich, Germany).
The maximum level of P700+ is called Pm in analogy with Fm. It was determined by application of a saturation pulse (300 ms, 10000 μmol m-2s-1; 635nm)
after pre-illumination with far-red light.Data presented below are mean (n=5)plants/treatment.
	(B) 20th day of drought-Secondary Leaves
		10%WCappelle_OJIP Fluorescence data					60%WCappelle_OJIP Fluorescence data					10%W Plainsman OJIP Fluorescence data					60%W Plainsman OJIP Fluorescence data					10%WCappelle_P700 data					60%WCappelle_P700 data					10%W Plainsman P700 data					60%W Plainsman P700 data
	Time (s)	Mean	Mean/Fo	Mean-Fo	(Mean-Fo)/Fv		Mean	Mean/Fo	Mean-Fo	(Mean-Fo)/Fv		Mean	Mean/Fo	Mean-Fo	(Mean-Fo)/Fv		Mean	Mean/Fo	Mean-Fo	(Mean-Fo)/Fv		Mean	Mean/Po	Mean-Po	(Mean-Po)/Pv		Mean	Mean/Po	Mean-Po	(Mean-Po)/Pv		Mean	Mean/Po	Mean-Po	(Mean-Po)/Pv		Mean	Mean/Po	Mean-Po	(Mean-Po)/Pv
	0.1	0.824575	0.999994	-5e-06	-1.64855e-06		0.79464	1	0	0		0.6968	1	0	0		0.748067	0.999996	-3.33333e-06	-1.24304e-06		0.0928	1	1.38778e-17	5.25186e-18		0.15336	1	0	0		0.165675	1	0	0		0.236333	1	3.33067e-16	1.92009e-16
	0.3	0.969675	1.17596	0.145095	0.0478392		0.94996	1.19546	0.15532	0.0540266		0.86425	1.24031	0.16745	0.0682698		0.908167	1.21401	0.160097	0.0597019		0.228325	2.4604	0.135525	0.0512876		0.309	2.01487	0.15564	0.0771855		0.2967	1.79086	0.131025	0.0555966		0.378233	1.60042	0.1419	0.0818037
	0.6	1.28592	1.55949	0.461345	0.15211		1.28288	1.61442	0.48824	0.16983		1.1738	1.68456	0.477	0.194474		1.23917	1.65648	0.491097	0.183136		0.540275	5.82193	0.447475	0.169341		0.62972	4.10616	0.47636	0.236238		0.546	3.29561	0.380325	0.16138		0.663933	2.80931	0.4276	0.246506
	0.9	1.5647	1.89757	0.74012	0.244025		1.56744	1.97252	0.7728	0.268811		1.4176	2.03444	0.7208	0.293872		1.5127	2.02214	0.76463	0.285139		0.894	9.63362	0.8012	0.303203		0.94944	6.19092	0.79608	0.394795		0.76965	4.64554	0.603975	0.256279		0.936933	3.96446	0.7006	0.403888
	1.2	1.77107	2.14785	0.946495	0.312069		1.7791	2.23888	0.98446	0.342435		1.5928	2.28588	0.896	0.365301		1.71157	2.28798	0.963497	0.359299		1.22323	13.1813	1.13043	0.427794		1.21644	7.93192	1.06308	0.527206		0.948925	5.72763	0.78325	0.332349		1.16403	4.92539	0.9277	0.534808
	1.5	1.91595	2.32355	1.09137	0.359835		1.923	2.41996	1.12836	0.392489		1.71245	2.45759	1.01565	0.414083		1.84533	2.46679	1.09726	0.409182		1.5122	16.2953	1.4194	0.537153		1.43004	9.32473	1.27668	0.633136		1.08648	6.55787	0.9208	0.390714		1.34283	5.68195	1.1065	0.637885
	1.8	2.01405	2.44252	1.18947	0.39218		2.01694	2.53818	1.2223	0.425166		1.78897	2.56742	1.09217	0.445282		1.93	2.57997	1.18193	0.440756		1.75537	18.9157	1.66257	0.629179		1.59706	10.4138	1.4437	0.715965		1.18965	7.18062	1.02398	0.434493		1.47903	6.25825	1.2427	0.716402
	2.1	2.07795	2.52001	1.25337	0.413248		2.07962	2.61706	1.28498	0.446968		1.84147	2.64276	1.14468	0.466687		1.99297	2.66414	1.2449	0.464237		1.95135	21.0275	1.85855	0.703343		1.72764	11.2653	1.57428	0.780722		1.26963	7.66335	1.10395	0.468428		1.59437	6.74626	1.35803	0.782891
	2.4	2.1223	2.5738	1.29772	0.427871		2.12096	2.66908	1.32632	0.461348		1.88138	2.70002	1.18457	0.482954		2.03363	2.71851	1.28556	0.479402		2.1097	22.7338	2.0169	0.763269		1.82614	11.9075	1.67278	0.829571		1.3315	8.03682	1.16582	0.494683		1.67823	7.10113	1.4419	0.831239
	2.7	2.16015	2.6197	1.33557	0.440351		2.15402	2.71069	1.35938	0.472848		1.91535	2.74878	1.21855	0.496806		2.0654	2.76097	1.31733	0.491248		2.23727	24.1086	2.14447	0.811548		1.90104	12.3959	1.74768	0.866716		1.37647	8.30828	1.2108	0.513767		1.73867	7.35684	1.50233	0.866078
	3	2.19192	2.65823	1.36735	0.450827		2.1851	2.7498	1.39046	0.483658		1.94975	2.79815	1.25295	0.510831		2.09797	2.80451	1.3499	0.503392		2.33352	25.1457	2.24072	0.847973		1.95962	12.7779	1.80626	0.895767		1.41065	8.51456	1.24497	0.528268		1.78783	7.56488	1.5515	0.894422
	3.3	2.2261	2.69968	1.40152	0.462095		2.21344	2.78546	1.4188	0.493516		1.98595	2.8501	1.28915	0.525589		2.1305	2.848	1.38243	0.515524		2.40923	25.9615	2.31643	0.87662		2.00292	13.0603	1.84956	0.91724		1.43265	8.64735	1.26697	0.537603		1.82553	7.7244	1.5892	0.916156
	3.6	2.2617	2.74285	1.43712	0.473833		2.24764	2.8285	1.453	0.505412		2.02402	2.90474	1.32723	0.541113		2.1655	2.89478	1.41743	0.528576		2.46848	26.5999	2.37568	0.899043		2.03844	13.2919	1.88508	0.934855		1.45158	8.76158	1.2859	0.545634		1.8532	7.84147	1.61687	0.932105
	3.9	2.29873	2.78775	1.47415	0.48604		2.28232	2.87214	1.48768	0.517476		2.06225	2.9596	1.36545	0.556697		2.20297	2.94487	1.4549	0.542548		2.51383	27.0886	2.42103	0.916205		2.06366	13.4563	1.9103	0.947363		1.4654	8.84503	1.29973	0.5515		1.87517	7.93441	1.63883	0.944769
	4.2	2.33677	2.8339	1.51219	0.498586		2.31712	2.91594	1.52248	0.52958		2.10602	3.02242	1.40922	0.574544		2.24013	2.99455	1.49206	0.556408		2.55008	27.4793	2.45728	0.929923		2.08402	13.5891	1.93066	0.95746		1.48105	8.93949	1.31537	0.55814		1.889	7.99295	1.65267	0.952743
	4.5	2.37628	2.8818	1.5517	0.511609		2.35476	2.9633	1.56012	0.542673		2.14447	3.0776	1.44768	0.59022		2.28003	3.04789	1.53196	0.571287		2.57693	27.7686	2.48413	0.940084		2.09734	13.6759	1.94398	0.964065		1.48575	8.96786	1.32008	0.560135		1.9042	8.05726	1.66787	0.961506
	4.8	2.41617	2.93019	1.5916	0.524765		2.3899	3.00753	1.59526	0.554896		2.18395	3.13426	1.48715	0.606314		2.32073	3.10229	1.57266	0.586465		2.60275	28.0469	2.50995	0.949857		2.10614	13.7333	1.95278	0.96843		1.4935	9.01464	1.32783	0.563423		1.91563	8.10564	1.6793	0.968097
	5.1	2.45178	2.97336	1.62719	0.536502		2.42668	3.05381	1.63204	0.56769		2.22265	3.1898	1.52585	0.622093		2.35653	3.15015	1.60846	0.599815		2.61987	28.2314	2.52707	0.956338		2.11574	13.7959	1.96238	0.97319		1.4992	9.04904	1.33353	0.565842		1.92077	8.12736	1.68443	0.971056
	5.4	2.48963	3.01926	1.66505	0.548982		2.4622	3.09851	1.66756	0.580045		2.25705	3.23916	1.56025	0.636118		2.39533	3.20202	1.64726	0.614284		2.63267	28.3693	2.53987	0.961182		2.1229	13.8426	1.96954	0.976741		1.49978	9.05251	1.3341	0.566086		1.92643	8.15134	1.6901	0.974323
	5.7	2.52038	3.05656	1.69579	0.55912		2.4949	3.13966	1.70026	0.591419		2.29038	3.28699	1.59357	0.649704		2.42897	3.24698	1.6809	0.626826		2.64102	28.4593	2.54822	0.964342		2.12648	13.8659	1.97312	0.978517		1.50143	9.06247	1.33575	0.566786		1.93	8.16643	1.69367	0.976379
	6	2.55415	3.09752	1.72957	0.570256		2.52454	3.17696	1.7299	0.601729		2.31973	3.32911	1.62292	0.66167		2.46097	3.28975	1.7129	0.638759		2.652	28.5776	2.5592	0.968495		2.13072	13.8936	1.97736	0.980619		1.50307	9.07243	1.3374	0.567486		1.93513	8.18815	1.6988	0.979339
	6.3	2.5822	3.13153	1.75762	0.579505		2.55498	3.21527	1.76034	0.612318		2.3488	3.37084	1.652	0.673524		2.49137	3.33039	1.7433	0.650096		2.65998	28.6635	2.56718	0.971513		2.13822	13.9425	1.98486	0.984339		1.50467	9.08209	1.339	0.568165		1.93977	8.20776	1.70343	0.98201
	6.6	2.60723	3.16188	1.78265	0.587756		2.57874	3.24517	1.7841	0.620582		2.37568	3.40941	1.67887	0.684481		2.51767	3.36555	1.7696	0.659903		2.66565	28.7247	2.57285	0.973661		2.14098	13.9605	1.98762	0.985707		1.50775	9.10065	1.34207	0.56947		1.93947	8.20649	1.70313	0.981837
	6.9	2.6345	3.19496	1.80992	0.596748		2.60402	3.27698	1.80938	0.629376		2.4005	3.44503	1.7037	0.694602		2.54487	3.40191	1.7968	0.670046		2.674	28.8147	2.5812	0.976821		2.14572	13.9914	1.99236	0.988058		1.51058	9.1177	1.3449	0.570668		1.9422	8.21805	1.70587	0.983413
	7.2	2.6579	3.22334	1.83332	0.604464		2.62728	3.30625	1.83264	0.637467		2.42227	3.47628	1.72548	0.70348		2.56547	3.42945	1.8174	0.677728		2.6811	28.8912	2.5883	0.979508		2.14912	14.0136	1.99576	0.989744		1.51343	9.1349	1.34775	0.571878		1.94357	8.22384	1.70723	0.9842
	7.5	2.67865	3.2485	1.85407	0.611305		2.64876	3.33328	1.85412	0.644938		2.44588	3.51015	1.74907	0.713102		2.59097	3.46354	1.8429	0.687238		2.68518	28.9351	2.59238	0.98105		2.15156	14.0295	1.9982	0.990954		1.51365	9.13626	1.34797	0.571973		1.95333	8.26516	1.717	0.989831
	7.8	2.69842	3.27248	1.87384	0.617825		2.67106	3.36135	1.87642	0.652695		2.46583	3.53878	1.76903	0.721236		2.61213	3.49183	1.86406	0.695131		2.68967	28.9836	2.59687	0.982753		2.1545	14.0486	2.00114	0.992412		1.51222	9.12766	1.34655	0.571369		1.9536	8.26629	1.71727	0.989984
	8.1	2.71897	3.29741	1.8944	0.624601		2.68914	3.3841	1.8945	0.658984		2.48535	3.56681	1.78855	0.729196		2.63167	3.51794	1.8836	0.702415		2.69373	29.0272	2.60093	0.984285		2.15416	14.0464	2.0008	0.992244		1.51323	9.1337	1.34755	0.571793		1.95413	8.26855	1.7178	0.990292
	8.4	2.7379	3.32036	1.91332	0.63084		2.70784	3.40763	1.9132	0.665489		2.50572	3.59605	1.80892	0.737503		2.65367	3.54735	1.9056	0.710619		2.6966	29.0582	2.6038	0.985373		2.1561	14.0591	2.00274	0.993206		1.51507	9.14486	1.3494	0.572578		1.9585	8.28702	1.72217	0.992809
	8.7	2.7548	3.34085	1.93022	0.636412		2.72806	3.43308	1.93342	0.672522		2.52465	3.62321	1.82785	0.745219		2.6748	3.5756	1.92673	0.7185		2.69983	29.0929	2.60703	0.986594		2.15858	14.0752	2.00522	0.994436		1.5163	9.15226	1.35062	0.573098		1.96013	8.29394	1.7238	0.993751
	9	2.77355	3.36359	1.94897	0.642595		2.74724	3.45721	1.9526	0.679194		2.54272	3.64915	1.84593	0.752588		2.69327	3.60029	1.9452	0.725387		2.70515	29.1503	2.61235	0.988609		2.15824	14.073	2.00488	0.994267		1.51505	9.14471	1.34937	0.572567		1.96443	8.31213	1.7281	0.99623
	9.3	2.79223	3.38624	1.96765	0.648752		2.765	3.47956	1.97036	0.685371		2.56245	3.67745	1.86565	0.76063		2.71633	3.63112	1.96826	0.733988		2.7098	29.2004	2.617	0.990369		2.16086	14.0901	2.0075	0.995566		1.51687	9.15573	1.3512	0.573342		1.96903	8.33159	1.7327	0.998882
	9.6	2.80932	3.40698	1.98474	0.65439		2.78406	3.50355	1.98942	0.692001		2.57975	3.70228	1.88295	0.767683		2.73237	3.65255	1.9843	0.739967		2.71468	29.253	2.62188	0.992214		2.16376	14.109	2.0104	0.997005		1.5173	9.15829	1.35163	0.573522		1.96877	8.33047	1.73243	0.998728
	9.9	2.82828	3.42996	2.0037	0.660638		2.80082	3.52464	2.00618	0.697831		2.5987	3.72948	1.9019	0.775409		2.7505	3.67679	2.00243	0.74673		2.71957	29.3058	2.62677	0.994068		2.16362	14.1081	2.01026	0.996935		1.5177	9.16071	1.35203	0.573692		1.97097	8.33977	1.73463	0.999996
	10.2	2.84393	3.44894	2.01934	0.665798		2.81742	3.54553	2.02278	0.703605		2.61643	3.75492	1.91962	0.782636		2.76927	3.70188	2.0212	0.753728		2.72262	29.3386	2.62982	0.995222		2.1649	14.1165	2.01154	0.99757		1.5185	9.16553	1.35282	0.574031		1.96797	8.32708	1.73163	0.998267
	10.5	2.8602	3.46867	2.03562	0.671164		2.8373	3.57055	2.04266	0.71052		2.63207	3.77738	1.93528	0.789016		2.7882	3.72719	2.04013	0.760788		2.72325	29.3454	2.63045	0.995459		2.16866	14.141	2.0153	0.999435		1.5169	9.15588	1.35122	0.573352		1.96583	8.31805	1.7295	0.997037
	10.8	2.8775	3.48966	2.05292	0.676868		2.8534	3.59081	2.05876	0.71612		2.6504	3.80367	1.9536	0.796487		2.8059	3.75085	2.05783	0.767389		2.7259	29.3739	2.6331	0.996462		2.16754	14.1337	2.01418	0.998879		1.51893	9.1681	1.35325	0.574212		1.9639	8.30987	1.72757	0.995922
	11.1	2.8956	3.51161	2.07102	0.682836		2.87212	3.61437	2.07748	0.722632		2.66605	3.82613	1.96925	0.802868		2.8243	3.77545	2.07623	0.77425		2.72955	29.4133	2.63675	0.997843		2.1698	14.1484	2.01644	1		1.5181	9.16312	1.35242	0.573861		1.96553	8.31678	1.7292	0.996864
	11.4	2.90945	3.5284	2.08487	0.687402		2.88466	3.63015	2.09002	0.726994		2.68135	3.84809	1.98455	0.809106		2.84413	3.80196	2.09606	0.781647		2.72953	29.413	2.63673	0.997833		2.16606	14.124	2.0127	0.998145		1.51545	9.14713	1.34977	0.572737		1.96773	8.32609	1.7314	0.998132
	11.7	2.92877	3.55184	2.10419	0.693774		2.90534	3.65617	2.1107	0.734187		2.69718	3.8708	2.00038	0.815558		2.8593	3.82224	2.11123	0.787302		2.73342	29.455	2.64062	0.999309		2.16736	14.1325	2.014	0.99879		1.51485	9.1435	1.34918	0.572482		1.96663	8.32144	1.7303	0.997498
	12	2.94425	3.57061	2.11967	0.698876		2.9226	3.67789	2.12796	0.740191		2.71125	3.891	2.01445	0.821296		2.87697	3.84585	2.1289	0.79389		2.7322	29.4418	2.6394	0.998846		2.16688	14.1294	2.01352	0.998552		1.51565	9.14833	1.34997	0.572822		1.96687	8.32243	1.73053	0.997633
	12.3	2.96115	3.5911	2.13657	0.704448		2.93902	3.69856	2.14438	0.745902		2.7261	3.91231	2.0293	0.82735		2.89323	3.8676	2.14516	0.799956		2.733	29.4504	2.6402	0.999149		2.16442	14.1133	2.01106	0.997332		1.5167	9.15467	1.35102	0.573267		1.9658	8.31791	1.72947	0.997018
	12.6	2.977	3.61032	2.15242	0.709674		2.95564	3.71947	2.161	0.751684		2.74072	3.9333	2.04393	0.833313		2.909	3.88867	2.16093	0.805836		2.73442	29.4658	2.64162	0.999688		2.16168	14.0955	2.00832	0.995973		1.5173	9.15829	1.35163	0.573522		1.96853	8.32948	1.7322	0.998593
	12.9	2.99123	3.62757	2.16664	0.714364		2.97126	3.73913	2.17662	0.757117		2.75418	3.9526	2.05737	0.838797		2.9247	3.90966	2.17663	0.811691		2.73157	29.4351	2.63877	0.998609		2.16246	14.1005	2.0091	0.99636		1.51955	9.17187	1.35387	0.574477		1.9691	8.33188	1.73277	0.99892
	13.2	3.01202	3.6528	2.18744	0.721222		2.98708	3.75904	2.19244	0.76262		2.76638	3.97011	2.06957	0.843771		2.9407	3.93105	2.19263	0.817657		2.7391	29.5162	2.6463	1.00146		2.16524	14.1187	2.01188	0.997739		1.52135	9.18274	1.35567	0.57524		1.96637	8.32031	1.73003	0.997344
	13.5	3.0224	3.66538	2.19782	0.724643		2.99942	3.77456	2.20478	0.766912		2.7798	3.98938	2.083	0.849244		2.95483	3.94994	2.20676	0.822928		2.73525	29.4747	2.64245	1		2.16686	14.1292	2.0135	0.998542		1.52238	9.18892	1.3567	0.575675		1.96173	8.30071	1.7254	0.994673
	13.8	3.0362	3.68212	2.21162	0.729193		3.01344	3.79221	2.2188	0.771789		2.7918	4.0066	2.095	0.854136		2.9681	3.96768	2.22003	0.827875		2.73485	29.4704	2.64205	0.999849		2.16654	14.1272	2.01318	0.998383		1.51975	9.17308	1.35407	0.574562		1.9563	8.27772	1.71997	0.991541
	14.1	3.04942	3.69816	2.22485	0.733553		3.02614	3.80819	2.2315	0.776206		2.80403	4.02415	2.10723	0.859121		2.98087	3.98474	2.2328	0.832636		2.73462	29.4679	2.64182	0.999763		2.16492	14.1166	2.01156	0.99758		1.51893	9.1681	1.35325	0.574212		1.9536	8.26629	1.71727	0.989984
	14.4	3.0639	3.71571	2.23932	0.738326		3.03898	3.82435	2.24434	0.780673		2.81398	4.03843	2.11718	0.863177		2.99443	4.00288	2.24636	0.837695		2.73362	29.4572	2.64082	0.999385		2.16232	14.0996	2.00896	0.99629		1.51792	9.16206	1.35225	0.573787		1.95197	8.25938	1.71563	0.989043
	14.7	3.07695	3.73154	2.25237	0.742629		3.05152	3.84013	2.25688	0.785035		2.82457	4.05364	2.12778	0.867499		3.008	4.02101	2.25993	0.842754		2.7328	29.4483	2.64	0.999073		2.15954	14.0815	2.00618	0.994912		1.5175	9.1595	1.35183	0.573607		1.9517	8.25825	1.71537	0.988889
	15	3.0875	3.74433	2.26292	0.746107		3.06244	3.85387	2.2678	0.788833		2.83495	4.06853	2.13815	0.871729		3.01803	4.03443	2.26996	0.846496		2.73057	29.4243	2.63777	0.998231		2.15742	14.0677	2.00406	0.99386		1.51465	9.1423	1.34898	0.572398		1.95033	8.25247	1.714	0.988101
	15.3	3.09992	3.7594	2.27535	0.750204		3.07418	3.86864	2.27954	0.792917		2.8417	4.07821	2.1449	0.874481		3.03353	4.05515	2.28546	0.852276		2.732	29.4397	2.6392	0.99877		2.15678	14.0635	2.00342	0.993543		1.5118	9.12509	1.34613	0.571188		1.95223	8.26051	1.7159	0.989197
	15.6	3.11072	3.7725	2.28614	0.753764		3.08506	3.88234	2.29042	0.796701		2.85308	4.09454	2.15627	0.879118		3.04083	4.0649	2.29276	0.854998		2.72912	29.4087	2.63632	0.997682		2.15726	14.0666	2.0039	0.993781		1.5114	9.12268	1.34573	0.571018		1.9498	8.25021	1.71347	0.987794
	15.9	3.1221	3.78629	2.29752	0.757515		3.09482	3.89462	2.30018	0.800096		2.8622	4.10763	2.1654	0.882839		3.0517	4.07943	2.30363	0.859051		2.7269	29.3847	2.6341	0.99684		2.15566	14.0562	2.0023	0.992988		1.5124	9.12872	1.34672	0.571443		1.9528	8.26291	1.71647	0.989523
	16.2	3.13165	3.79787	2.30707	0.760664		3.10592	3.90859	2.31128	0.803957		2.86895	4.11732	2.17215	0.885591		3.06067	4.09142	2.3126	0.862394		2.72385	29.3518	2.63105	0.995686		2.15466	14.0497	2.0013	0.992492		1.5128	9.13113	1.34712	0.571613		1.9517	8.25825	1.71537	0.988889
	16.5	3.14308	3.81173	2.31849	0.764431		3.11276	3.9172	2.31812	0.806336		2.87668	4.12841	2.17988	0.88874		3.0715	4.1059	2.32343	0.866434		2.72242	29.3365	2.62962	0.995147		2.15238	14.0348	1.99902	0.991361		1.51487	9.14365	1.3492	0.572493		1.95333	8.26516	1.717	0.989831
	16.8	3.1514	3.82182	2.32682	0.767175		3.12298	3.93006	2.32834	0.809891		2.884	4.13892	2.1872	0.891726		3.07853	4.1153	2.33046	0.869057		2.71977	29.3079	2.62697	0.994144		2.15416	14.0464	2.0008	0.992244		1.51465	9.1423	1.34898	0.572398		1.94817	8.2433	1.71183	0.986852
	17.1	3.1622	3.83492	2.33762	0.770736		3.13212	3.94156	2.33748	0.81307		2.8897	4.1471	2.1929	0.89405		3.08533	4.12439	2.33726	0.871593		2.71795	29.2883	2.62515	0.993453		2.15256	14.036	1.9992	0.99145		1.51323	9.1337	1.34755	0.571793		1.946	8.23413	1.70967	0.985603
	17.4	3.17135	3.84602	2.34677	0.773753		3.13894	3.95014	2.3443	0.815443		2.89703	4.15761	2.20023	0.897037		3.09483	4.13709	2.34676	0.875135		2.71508	29.2573	2.62228	0.992365		2.1488	14.0115	1.99544	0.989586		1.51382	9.13732	1.34815	0.572047		1.94657	8.23653	1.71023	0.98593
	17.7	3.1805	3.85712	2.35592	0.77677		3.14674	3.95996	2.3521	0.818156		2.90333	4.16665	2.20653	0.899605		3.10107	4.14542	2.353	0.87746		2.71163	29.2201	2.61883	0.991059		2.1488	14.0115	1.99544	0.989586		1.51628	9.15211	1.3506	0.573087		1.94737	8.23992	1.71103	0.986391
	18	3.18598	3.86375	2.36139	0.778575		3.15408	3.96919	2.35944	0.820709		2.90722	4.17225	2.21042	0.901195		3.1084	4.15523	2.36033	0.880195		2.70613	29.1608	2.61333	0.988978		2.14862	14.0103	1.99526	0.989496		1.51588	9.14969	1.3502	0.572917		1.94953	8.24908	1.7132	0.98764
	18.3	3.19415	3.87367	2.36957	0.781271		3.15896	3.97533	2.36432	0.822407		2.91455	4.18276	2.21775	0.904182		3.11383	4.16249	2.36576	0.882221		2.70268	29.1237	2.60988	0.987672		2.14588	13.9924	1.99252	0.988138		1.51608	9.1509	1.3504	0.573002		1.94763	8.24104	1.7113	0.986545
	18.6	3.2033	3.88477	2.37872	0.784287		3.16696	3.9854	2.37232	0.825189		2.91942	4.18976	2.22262	0.906169		3.1217	4.17301	2.37363	0.885154		2.69983	29.0929	2.60703	0.986594		2.14342	13.9764	1.99006	0.986918		1.51505	9.14471	1.34937	0.572567		1.9471	8.23879	1.71077	0.986237
	18.9	3.20898	3.89165	2.3844	0.786158		3.172	3.99174	2.37736	0.826942		2.92345	4.19554	2.22665	0.90781		3.12877	4.18245	2.3807	0.88779		2.69435	29.0339	2.60155	0.984522		2.13856	13.9447	1.9852	0.984507		1.51525	9.14592	1.34957	0.572652		1.9449	8.22948	1.70857	0.984969
	19.2	3.21387	3.89759	2.3893	0.787774		3.17574	3.99645	2.3811	0.828243		2.92857	4.20289	2.23177	0.9099		3.13417	4.18967	2.3861	0.889803		2.68825	28.9682	2.59545	0.982213		2.1364	13.9306	1.98304	0.983436		1.51585	9.14954	1.35017	0.572907		1.94597	8.23399	1.70963	0.985584
	19.5	3.22265	3.90823	2.39807	0.790667		3.18388	4.00669	2.38924	0.831075		2.93245	4.20845	2.23565	0.91148		3.13797	4.19475	2.3899	0.89122		2.68682	28.9529	2.59402	0.981674		2.13544	13.9244	1.98208	0.98296		1.5175	9.1595	1.35183	0.573607		1.9452	8.23075	1.70887	0.985142
	19.8	3.22852	3.91536	2.40395	0.792604		3.18928	4.01349	2.39464	0.832953		2.93712	4.21516	2.24032	0.913386		3.1442	4.20308	2.39613	0.893545		2.68295	28.9111	2.59015	0.980208		2.133	13.9085	1.97964	0.98175		1.5167	9.15467	1.35102	0.573267		1.94273	8.22031	1.7064	0.98372
	20.1	3.2344	3.92248	2.40982	0.794541		3.19332	4.01857	2.39868	0.834358		2.94203	4.22219	2.24523	0.915383		3.14963	4.21035	2.40156	0.895571		2.67825	28.8605	2.58545	0.978429		2.13528	13.9233	1.98192	0.982881		1.51263	9.13007	1.34695	0.571538		1.9452	8.23075	1.70887	0.985142
	20.4	3.2393	3.92842	2.41472	0.796157		3.19838	4.02494	2.40374	0.836118		2.94502	4.2265	2.24823	0.916607		3.15157	4.21293	2.4035	0.896292		2.67218	28.795	2.57938	0.97613		2.13674	13.9328	1.98338	0.983605		1.51137	9.12253	1.3457	0.571008		1.9414	8.21467	1.70507	0.982951
	20.7	3.2446	3.93485	2.42002	0.797904		3.20308	4.03086	2.40844	0.837753		2.94932	4.23267	2.25252	0.91836		3.15667	4.21975	2.4086	0.898194		2.66852	28.7557	2.57572	0.974749		2.13642	13.9308	1.98306	0.983446		1.51343	9.1349	1.34775	0.571878		1.94143	8.21481	1.7051	0.982971
	21	3.2491	3.94031	2.42452	0.799388		3.20734	4.03622	2.4127	0.839235		2.95178	4.23619	2.25497	0.919359		3.16023	4.22452	2.41216	0.899524		2.66547	28.7228	2.57267	0.973595		2.13692	13.934	1.98356	0.983694		1.51242	9.12887	1.34675	0.571453		1.94057	8.21114	1.70423	0.982471
	21.3	3.25215	3.94401	2.42757	0.800394		3.2127	4.04296	2.41806	0.841099		2.9534	4.23852	2.2566	0.920021		3.1662	4.23249	2.41813	0.901749		2.66242	28.6899	2.56962	0.97244		2.13512	13.9223	1.98176	0.982801		1.5108	9.11906	1.34512	0.570764		1.94383	8.22496	1.7075	0.984354
	21.6	3.25988	3.95338	2.43529	0.802941		3.21318	4.04357	2.41854	0.841266		2.95847	4.2458	2.26167	0.92209		3.16917	4.23646	2.4211	0.902855		2.65955	28.6589	2.56675	0.971352		2.12992	13.8884	1.97656	0.980223		1.511	9.12027	1.34533	0.570849		1.94573	8.233	1.7094	0.985449
	21.9	3.26558	3.96029	2.441	0.80482		3.22036	4.0526	2.42572	0.843764		2.9599	4.24785	2.2631	0.922671		3.17163	4.23975	2.42356	0.903775		2.65505	28.6105	2.56225	0.969649		2.12974	13.8872	1.97638	0.980133		1.51303	9.13249	1.34735	0.571708		1.94463	8.22835	1.7083	0.984815
	22.2	3.26903	3.96447	2.44444	0.805958		3.22376	4.05688	2.42912	0.844947		2.96215	4.25108	2.26535	0.923588		3.1754	4.24479	2.42733	0.90518		2.64752	28.5294	2.55472	0.966802		2.1268	13.868	1.97344	0.978675		1.5124	9.12872	1.34672	0.571443		1.94547	8.23188	1.70913	0.985296
	22.5	3.27327	3.96963	2.44869	0.807359		3.22508	4.05854	2.43044	0.845406		2.9658	4.25631	2.269	0.925077		3.1776	4.24773	2.42953	0.906		2.64387	28.49	2.55107	0.96542		2.12406	13.8502	1.9707	0.977316		1.51018	9.11529	1.3445	0.570499		1.94843	8.24443	1.7121	0.987006
	22.8	3.27553	3.97236	2.45094	0.808101		3.23078	4.06572	2.43614	0.847388		2.96825	4.25983	2.27145	0.926075		3.1811	4.25241	2.43303	0.907305		2.63983	28.4464	2.54703	0.963888		2.12308	13.8438	1.96972	0.97683		1.50978	9.11287	1.3441	0.570329		1.9468	8.23752	1.71047	0.986064
	23.1	3.279	3.97657	2.45442	0.809246		3.23322	4.06879	2.43858	0.848237		2.9709	4.26363	2.2741	0.927156		3.18467	4.25718	2.4366	0.908635		2.63433	28.3871	2.54153	0.961806		2.1208	13.8289	1.96744	0.9757		1.51202	9.12645	1.34635	0.571284		1.94467	8.22849	1.70833	0.984835
	23.4	3.2851	3.98397	2.46052	0.811258		3.2355	4.07166	2.44086	0.84903		2.97478	4.26919	2.27798	0.928736		3.18467	4.25718	2.4366	0.908635		2.6278	28.3168	2.535	0.959337		2.11998	13.8236	1.96662	0.975293		1.51425	9.13988	1.34858	0.572228		1.94437	8.22722	1.70803	0.984662
	23.7	3.28735	3.9867	2.46277	0.811999		3.2389	4.07593	2.44426	0.850213		2.97538	4.27006	2.27858	0.92898		3.189	4.26297	2.44093	0.910251		2.6219	28.2532	2.5291	0.957104		2.1192	13.8185	1.96584	0.974906		1.51385	9.13747	1.34817	0.572058		1.94083	8.21227	1.7045	0.982625
	24	3.29325	3.99385	2.46867	0.813945		3.24188	4.07968	2.44724	0.851249		2.97803	4.27386	2.28123	0.930061		3.19223	4.26729	2.44416	0.911457		2.61905	28.2225	2.52625	0.956026		2.11772	13.8088	1.96436	0.974172		1.51525	9.14592	1.34957	0.572652		1.93977	8.20776	1.70343	0.98201
	24.3	3.29548	3.99655	2.4709	0.814678		3.24852	4.08804	2.45388	0.853559		2.97925	4.27562	2.28245	0.93056		3.1955	4.27166	2.44743	0.912675		2.61152	28.1414	2.51872	0.953178		2.11772	13.8088	1.96436	0.974172		1.51628	9.15211	1.3506	0.573087		1.94113	8.21354	1.7048	0.982798
	24.6	3.2959	3.99707	2.47132	0.814818		3.24704	4.08618	2.4524	0.853044		2.97962	4.27616	2.28282	0.930713		3.19713	4.27384	2.44906	0.913284		2.6048	28.069	2.512	0.950633		2.11398	13.7844	1.96062	0.972318		1.51465	9.1423	1.34898	0.572398		1.94167	8.2158	1.70533	0.983105
	24.9	3.29975	4.00173	2.47517	0.816088		3.24864	4.08819	2.454	0.853601		2.9817	4.27913	2.2849	0.931559		3.19823	4.27531	2.45016	0.913695		2.5995	28.0119	2.5067	0.948627		2.11152	13.7684	1.95816	0.971098		1.51018	9.11529	1.3445	0.570499		1.9384	8.20197	1.70207	0.981222
	25.2	3.30302	4.00571	2.47844	0.817168		3.25112	4.09131	2.45648	0.854463		2.98395	4.28236	2.28715	0.932476		3.2015	4.27968	2.45343	0.914913		2.5938	27.9504	2.501	0.94647		2.11038	13.761	1.95702	0.970532		1.511	9.12027	1.34533	0.570849		1.93703	8.19619	1.7007	0.980434
	25.5	3.30708	4.01062	2.4825	0.818503		3.2542	4.09519	2.45956	0.855535		2.98577	4.28498	2.28898	0.93322		3.20447	4.28365	2.4564	0.916019		2.59037	27.9135	2.49757	0.945174		2.10872	13.7501	1.95536	0.969709		1.5116	9.12389	1.34593	0.571103		1.93787	8.19972	1.70153	0.980914
	25.8	3.30955	4.01362	2.48497	0.819319		3.25518	4.09642	2.46054	0.855876		2.98778	4.28785	2.29097	0.934036		3.2047	4.28396	2.45663	0.916106		2.58442	27.8494	2.49162	0.942922		2.10566	13.7302	1.9523	0.968191		1.51182	9.12525	1.34615	0.571199		1.93433	8.18477	1.698	0.978877
	26.1	3.31177	4.01632	2.48719	0.820053		3.25942	4.10176	2.46478	0.857351		2.98985	4.29083	2.29305	0.934882		3.20663	4.28654	2.45856	0.916827		2.57567	27.7551	2.48287	0.939611		2.10484	13.7248	1.95148	0.967785		1.5126	9.12992	1.34692	0.571528		1.93567	8.19041	1.69933	0.979646
	26.4	3.315	4.02023	2.49042	0.821116		3.26122	4.10402	2.46658	0.857977		2.99083	4.29223	2.29402	0.935279		3.2096	4.29051	2.46153	0.917933		2.56818	27.6743	2.47538	0.936773		2.10274	13.7111	1.94938	0.966743		1.51442	9.14094	1.34875	0.572302		1.9376	8.19859	1.70127	0.980761
	26.7	3.31787	4.02372	2.49329	0.822064		3.26186	4.10483	2.46722	0.858199		2.99227	4.29431	2.29548	0.93587		3.20907	4.28979	2.461	0.917734		2.56208	27.6086	2.46928	0.934464		2.10062	13.6973	1.94726	0.965692		1.5167	9.15467	1.35102	0.573267		1.933	8.17913	1.69667	0.978109
	27	3.31948	4.02566	2.4949	0.822591		3.26544	4.10933	2.4708	0.859445		2.9939	4.29664	2.2971	0.936533		3.21287	4.29487	2.4648	0.919152		2.55498	27.5321	2.46217	0.931777		2.0993	13.6887	1.94594	0.965037		1.5126	9.12992	1.34692	0.571528		1.9338	8.18251	1.69747	0.97857
	27.3	3.3209	4.02738	2.49632	0.823061		3.26596	4.10999	2.47132	0.859625		2.9947	4.29779	2.2979	0.936859		3.21447	4.29701	2.4664	0.919748		2.54968	27.4749	2.45688	0.929772		2.0967	13.6718	1.94334	0.963748		1.50957	9.11166	1.3439	0.570244		1.93407	8.18364	1.69773	0.978724
	27.6	3.32377	4.03087	2.49919	0.824009		3.26888	4.11366	2.47424	0.860641		2.99613	4.29983	2.29933	0.93744		3.2153	4.29813	2.46723	0.920059		2.5458	27.4332	2.453	0.928305		2.09396	13.6539	1.9406	0.962389		1.50795	9.10186	1.34228	0.569555		1.933	8.17913	1.69667	0.978109
	27.9	3.3264	4.03405	2.50182	0.824875		3.27082	4.1161	2.47618	0.861316		2.99635	4.30016	2.29955	0.937532		3.2164	4.2996	2.46833	0.920469		2.53825	27.3518	2.44545	0.925448		2.0915	13.6378	1.93814	0.961169		1.50527	9.08571	1.3396	0.56842		1.9319	8.17447	1.69557	0.977475
	28.2	3.32905	4.03727	2.50447	0.825748		3.27164	4.11713	2.477	0.861601		2.99878	4.30364	2.30198	0.938521		3.21803	4.30178	2.46996	0.921078		2.53218	27.2864	2.43938	0.923149		2.0884	13.6176	1.93504	0.959632		1.50772	9.1005	1.34205	0.569459		1.9311	8.17109	1.69477	0.977013
	28.5	3.3315	4.04024	2.50692	0.826556		3.27258	4.11832	2.47794	0.861928		2.99938	4.3045	2.30258	0.938765		3.21993	4.30432	2.47186	0.921787		2.52807	27.2422	2.43527	0.921597		2.08908	13.6221	1.93572	0.959969		1.50895	9.10789	1.34327	0.569979		1.93243	8.17673	1.6961	0.977782
	28.8	3.33495	4.04442	2.51037	0.827694		3.27556	4.12207	2.48092	0.862965		2.99923	4.30428	2.30242	0.938704		3.2202	4.30468	2.47213	0.921886		2.52382	27.1964	2.43102	0.919989		2.0863	13.6039	1.93294	0.95859		1.50895	9.10789	1.34327	0.569979		1.9308	8.16982	1.69447	0.976841
	29.1	3.33537	4.04494	2.51079	0.827834		3.2754	4.12187	2.48076	0.862909		2.9994	4.30454	2.3026	0.938775		3.221	4.30575	2.47293	0.922185		2.51445	27.0954	2.42165	0.916441		2.08238	13.5784	1.92902	0.956646		1.50713	9.09688	1.34145	0.569205		1.93083	8.16996	1.6945	0.97686
	29.4	3.33637	4.04615	2.5118	0.828163		3.27752	4.12453	2.48288	0.863646		3.00122	4.30715	2.30443	0.939519		3.22127	4.3061	2.4732	0.922284		2.50895	27.0361	2.41615	0.91436		2.0822	13.5772	1.92884	0.956557		1.50772	9.1005	1.34205	0.569459		1.93137	8.17221	1.69503	0.977167
	29.7	3.33882	4.04912	2.51424	0.828971		3.27912	4.12655	2.48448	0.864203		3.00265	4.3092	2.30585	0.9401		3.22453	4.31047	2.47646	0.923502		2.50283	26.9701	2.41003	0.912042		2.08204	13.5762	1.92868	0.956478		1.5057	9.08828	1.34003	0.5686		1.93053	8.16869	1.6942	0.976687
	30	3.3411	4.05188	2.51652	0.829721		3.27978	4.12738	2.48514	0.864433		3.0053	4.313	2.3085	0.941181		3.2251	4.31123	2.47703	0.923713		2.49408	26.8758	2.40128	0.908731		2.08042	13.5656	1.92706	0.955674		1.5061	9.09069	1.34042	0.56877		1.93053	8.16869	1.6942	0.976687
	30.3	3.34127	4.05209	2.51669	0.829779		3.28236	4.13063	2.48772	0.86533		3.00387	4.31096	2.30708	0.9406		3.22533	4.31154	2.47726	0.9238		2.48698	26.7993	2.39418	0.906044		2.08026	13.5646	1.9269	0.955595		1.5053	9.08586	1.33963	0.56843		1.93163	8.17334	1.6953	0.977321
	30.6	3.34432	4.05579	2.51974	0.830785		3.28498	4.13392	2.49034	0.866241		3.00652	4.31476	2.30972	0.94168		3.2275	4.31444	2.47943	0.924608		2.48007	26.7249	2.38727	0.903432		2.0744	13.5263	1.92104	0.952689		1.50713	9.09688	1.34145	0.569205		1.93433	8.18477	1.698	0.978877
	30.9	3.34655	4.05849	2.52197	0.831518		3.28484	4.13375	2.4902	0.866193		3.00632	4.31447	2.30952	0.941599		3.22807	4.31519	2.48	0.92482		2.46965	26.6126	2.37685	0.899487		2.07114	13.5051	1.91778	0.951072		1.5049	9.08345	1.33923	0.56826		1.93433	8.18477	1.698	0.978877
	31.2	3.34797	4.06022	2.52339	0.831988		3.28774	4.1374	2.4931	0.867201		3.00732	4.31591	2.31053	0.942006		3.23243	4.32103	2.48436	0.926448		2.46437	26.5558	2.37157	0.897491		2.07132	13.5063	1.91796	0.951161		1.50265	9.06987	1.33698	0.567306		1.9354	8.18928	1.69907	0.979492
	31.5	3.34822	4.06052	2.52365	0.832071		3.28824	4.13802	2.4936	0.867375		3.00853	4.31763	2.31173	0.942496		3.22997	4.31773	2.4819	0.925528		2.45688	26.4749	2.36408	0.894653		2.06738	13.4806	1.91402	0.949208		1.50165	9.06383	1.33597	0.566881		1.9316	8.1732	1.69527	0.977302
	31.8	3.35045	4.06322	2.52587	0.832804		3.28972	4.13989	2.49508	0.86789		3.00875	4.31795	2.31195	0.942587		3.23133	4.31956	2.48326	0.926038		2.44932	26.3936	2.35652	0.891795		2.06416	13.4596	1.9108	0.947611		1.49978	9.05251	1.3341	0.566086		1.93187	8.17433	1.69553	0.977455
	32.1	3.35308	4.0664	2.52849	0.83367		3.29134	4.14193	2.4967	0.868454		3.00835	4.31738	2.31155	0.942424		3.2335	4.32246	2.48543	0.926846		2.44303	26.3257	2.35023	0.889411		2.0633	13.454	1.90994	0.947184		1.50103	9.06006	1.33535	0.566616		1.93297	8.17898	1.69663	0.97809
	32.4	3.3549	4.06862	2.53032	0.834271		3.29134	4.14193	2.4967	0.868454		3.0104	4.32032	2.3136	0.94326		3.23457	4.32388	2.4865	0.927244		2.4351	26.2403	2.3423	0.886412		2.0604	13.4351	1.90704	0.945746		1.50305	9.07228	1.33737	0.567475		1.93217	8.1756	1.69583	0.977628
	32.7	3.35655	4.07062	2.53197	0.834815		3.2949	4.14641	2.50026	0.869692		3.011	4.32118	2.3142	0.943505		3.2351	4.3246	2.48703	0.927443		2.42738	26.1571	2.33458	0.883489		2.06154	13.4425	1.90818	0.946311		1.50063	9.05764	1.33495	0.566446		1.92593	8.14922	1.6896	0.974035
	33	3.35652	4.07059	2.53194	0.834807		3.29672	4.1487	2.50208	0.870325		3.0116	4.32204	2.3148	0.943749		3.23647	4.32642	2.4884	0.927952		2.42163	26.0951	2.32883	0.881313		2.06154	13.4425	1.90818	0.946311		1.4986	9.04542	1.33292	0.565587		1.92267	8.1354	1.68633	0.972152
	33.3	3.36203	4.07726	2.53744	0.836621		3.29558	4.14726	2.50094	0.869928		3.013	4.32405	2.3162	0.94432		3.23673	4.32678	2.48866	0.928052		2.41495	26.0232	2.32215	0.878787		2.0565	13.4096	1.90314	0.943812		1.49552	9.02686	1.32985	0.564282		1.9243	8.14231	1.68797	0.973093
	33.6	3.36077	4.07574	2.5362	0.836208		3.29978	4.15255	2.50514	0.871389		3.01363	4.32495	2.31683	0.944575		3.23943	4.33039	2.49136	0.929059		2.40515	25.9176	2.31235	0.875078		2.05502	13.4	1.90166	0.943078		1.49592	9.02927	1.33025	0.564452		1.92917	8.16291	1.69283	0.975899
	33.9	3.36285	4.07826	2.53827	0.836893		3.29914	4.15174	2.5045	0.871167		3.01403	4.32552	2.31723	0.944738		3.23973	4.33079	2.49166	0.92917		2.39947	25.8564	2.30667	0.87293		2.05044	13.3701	1.89708	0.940807		1.49875	9.04633	1.33308	0.565651		1.92863	8.16065	1.6923	0.975591
	34.2	3.36365	4.07923	2.53907	0.837156		3.30108	4.15418	2.50644	0.871842		3.0159	4.32821	2.3191	0.945502		3.24083	4.33226	2.49276	0.929581		2.39113	25.7664	2.29833	0.86977		2.05046	13.3702	1.8971	0.940816		1.4994	9.05025	1.33373	0.565927		1.9289	8.16178	1.69257	0.975745
	34.5	3.36587	4.08193	2.54129	0.83789		3.30242	4.15587	2.50778	0.872308		3.01485	4.32671	2.31805	0.945074		3.24217	4.33404	2.4941	0.930078		2.3846	25.6961	2.2918	0.867301		2.04836	13.3565	1.895	0.939775		1.4996	9.05146	1.33393	0.566012		1.93027	8.16756	1.69393	0.976533
	34.8	3.36713	4.08344	2.54255	0.838302		3.30306	4.15667	2.50842	0.87253		3.01567	4.32789	2.31887	0.945411		3.2408	4.33221	2.49273	0.929568		2.3781	25.6261	2.2853	0.864841		2.04524	13.3362	1.89188	0.938228		1.5004	9.05628	1.33472	0.566351		1.9273	8.15501	1.69097	0.974823
	35.1	3.3671	4.08341	2.54252	0.838294		3.30352	4.15725	2.50888	0.87269		3.0177	4.3308	2.3209	0.946236		3.24107	4.33257	2.493	0.929668		2.37012	25.5401	2.27732	0.861823		2.04348	13.3247	1.89012	0.937355		1.49897	9.04768	1.3333	0.565746		1.9278	8.15712	1.69147	0.975111
	35.4	3.37118	4.08835	2.54659	0.839637		3.30404	4.15791	2.5094	0.872871		3.0171	4.32994	2.3203	0.945992		3.2419	4.33369	2.49383	0.929978		2.36262	25.4593	2.26982	0.858985		2.04134	13.3108	1.88798	0.936294		1.49432	9.01962	1.32865	0.563773		1.9262	8.15035	1.68987	0.974189
	35.7	3.37217	4.08957	2.54759	0.839967		3.30614	4.16055	2.5115	0.873602		3.0183	4.33166	2.3215	0.946481		3.24353	4.33587	2.49546	0.930587		2.3535	25.361	2.2607	0.855532		2.04086	13.3076	1.8875	0.936056		1.49168	9.00362	1.326	0.562649		1.92593	8.14922	1.6896	0.974035
	36	3.37323	4.09084	2.54865	0.840313		3.30712	4.16178	2.51248	0.873943		3.01952	4.33342	2.32273	0.94698		3.24623	4.33948	2.49816	0.931594		2.34393	25.2578	2.25113	0.851908		2.03874	13.2938	1.88538	0.935004		1.49063	8.99728	1.32495	0.562203		1.92677	8.15275	1.69043	0.974515
	36.3	3.37443	4.0923	2.54984	0.840709		3.31316	4.16938	2.51852	0.876044		3.0179	4.33108	2.3211	0.946318		3.24487	4.33765	2.4968	0.931085		2.33392	25.1501	2.24112	0.848124		2.03584	13.2749	1.88248	0.933566		1.4892	8.98868	1.32353	0.561599		1.9251	8.1457	1.68877	0.973555
	36.6	3.37547	4.09357	2.5509	0.841055		3.3076	4.16239	2.51296	0.87411		3.02058	4.33492	2.32377	0.947408		3.24597	4.33912	2.4979	0.931495		2.32337	25.0364	2.23057	0.844131		2.02852	13.2272	1.87516	0.929936		1.49165	9.00347	1.32597	0.562638		1.9224	8.13427	1.68607	0.971998
	36.9	3.3777	4.09627	2.55312	0.841789		3.31118	4.16689	2.51654	0.875355		3.02015	4.33431	2.32335	0.947235		3.24703	4.34055	2.49896	0.931893		2.31502	24.9464	2.22222	0.840971		2.02734	13.2195	1.87398	0.929351		1.49085	8.99864	1.32517	0.562299		1.9224	8.13427	1.68607	0.971998
	37.2	3.38545	4.10567	2.56087	0.844344		3.31134	4.16709	2.5167	0.87541		3.02055	4.33489	2.32375	0.947398		3.2484	4.34237	2.50033	0.932402		2.31277	24.9221	2.21997	0.84012		2.0223	13.1866	1.86894	0.926851		1.49002	8.99366	1.32435	0.561949		1.9251	8.1457	1.68877	0.973555
	37.5	3.3793	4.09821	2.55472	0.842316		3.31298	4.16916	2.51834	0.875981		3.02097	4.3355	2.32417	0.947572		3.24733	4.34095	2.49926	0.932005		2.2971	24.7532	2.2043	0.834188		2.02196	13.1844	1.8686	0.926683		1.49063	8.99728	1.32495	0.562203		1.92373	8.13992	1.6874	0.972767
	37.8	3.38178	4.10121	2.5572	0.843132		3.3151	4.17183	2.52046	0.876718		3.02097	4.3355	2.32417	0.947572		3.24867	4.34273	2.5006	0.932502		2.28777	24.6527	2.19497	0.830659		2.02034	13.1738	1.86698	0.925879		1.4902	8.99472	1.32452	0.562023		1.9232	8.13766	1.68687	0.972459
	38.1	3.38158	4.10097	2.557	0.843066		3.3156	4.17246	2.52096	0.876892		3.023	4.3384	2.3262	0.948397		3.24897	4.34313	2.5009	0.932614		2.28003	24.5692	2.18723	0.827726		2.01826	13.1603	1.8649	0.924848		1.49002	8.99366	1.32435	0.561949		1.92267	8.1354	1.68633	0.972152
	38.4	3.38625	4.10664	2.56167	0.844608		3.31606	4.17303	2.52142	0.877052		3.02237	4.33751	2.32558	0.948142		3.2511	4.34598	2.50303	0.933409		2.2749	24.514	2.1821	0.825787		2.01614	13.1465	1.86278	0.923796		1.4876	8.97903	1.32193	0.56092		1.9232	8.13766	1.68687	0.972459
	38.7	3.38503	4.10515	2.56045	0.844204		3.31788	4.17532	2.52324	0.877685		3.0232	4.33869	2.3264	0.948479		3.25383	4.34964	2.50576	0.934428		2.26475	24.4046	2.17195	0.821946		2.01302	13.1261	1.85966	0.922249		1.489	8.98748	1.32333	0.561514		1.92073	8.12722	1.6844	0.971037
	39	3.38808	4.10885	2.5635	0.845209		3.31868	4.17633	2.52404	0.877964		3.02422	4.34016	2.32742	0.948897		3.2525	4.34786	2.50443	0.933931		2.25805	24.3324	2.16525	0.81941		2.00894	13.0995	1.85558	0.920226		1.488	8.98144	1.32232	0.561089		1.9186	8.11819	1.68227	0.969807
	39.3	3.3889	4.10985	2.56432	0.845481		3.31952	4.17739	2.52488	0.878256		3.02402	4.33988	2.32722	0.948815		3.2533	4.34892	2.50523	0.93423		2.25113	24.2578	2.15833	0.816789		2.00778	13.0919	1.85442	0.91965		1.48453	8.96046	1.31885	0.559615		1.9189	8.11946	1.68257	0.96998
	39.6	3.38928	4.1103	2.56469	0.845605		3.32258	4.18124	2.52794	0.87932		3.02422	4.34016	2.32742	0.948897		3.25463	4.35071	2.50656	0.934727		2.2434	24.1746	2.1506	0.813866		2.00472	13.072	1.85136	0.918133		1.48453	8.96046	1.31885	0.559615		1.92	8.12412	1.68367	0.970614
	39.9	3.39315	4.115	2.56857	0.846883		3.32178	4.18023	2.52714	0.879042		3.02502	4.34131	2.32823	0.949223		3.25303	4.34857	2.50496	0.93413		2.23548	24.0892	2.14268	0.810867		2.00016	13.0423	1.8468	0.915872		1.48352	8.95443	1.31785	0.559191		1.91943	8.12172	1.6831	0.970288
	40.2	3.3948	4.11701	2.57022	0.847427		3.32388	4.18288	2.52924	0.879772		3.02827	4.34597	2.33148	0.950548		3.256	4.35253	2.50793	0.935236		2.2269	23.9968	2.1341	0.807622		1.99854	13.0317	1.84518	0.915068		1.48473	8.96167	1.31905	0.5597		1.92103	8.12849	1.6847	0.97121
	40.5	3.39395	4.11597	2.56937	0.847147		3.3242	4.18328	2.52956	0.879884		3.02628	4.3431	2.32947	0.949732		3.25657	4.35329	2.5085	0.935448		2.2133	23.8502	2.1205	0.802475		1.99674	13.02	1.84338	0.914175		1.48127	8.94085	1.3156	0.558236		1.9183	8.11693	1.68197	0.969634
	40.8	3.395	4.11725	2.57042	0.847493		3.32518	4.18451	2.53054	0.880225		3.02727	4.34454	2.33047	0.95014		3.25547	4.35182	2.5074	0.935038		2.20127	23.7206	2.10847	0.797924		1.99186	12.9881	1.8385	0.911755		1.48107	8.93964	1.3154	0.558151		1.91833	8.11707	1.682	0.969654
	41.1	3.39622	4.11873	2.57165	0.847897		3.327	4.1868	2.53236	0.880858		3.0285	4.3463	2.3317	0.950639		3.2579	4.35507	2.50983	0.935945		2.1931	23.6325	2.1003	0.794831		1.99138	12.985	1.83802	0.911517		1.48188	8.94447	1.3162	0.55849		1.91887	8.11932	1.68253	0.969961
	41.4	3.39765	4.12046	2.57307	0.848366		3.32762	4.18758	2.53298	0.881073		3.02867	4.34655	2.33188	0.950711		3.25843	4.35579	2.51036	0.936144		2.18375	23.5318	2.09095	0.791292		1.98648	12.9531	1.83312	0.909087		1.48067	8.93723	1.315	0.557981		1.9186	8.11819	1.68227	0.969807
	41.7	3.39905	4.12216	2.57447	0.848828		3.32798	4.18803	2.53334	0.881199		3.02908	4.34712	2.33228	0.950874		3.25953	4.35726	2.51146	0.936554		2.17583	23.4464	2.08303	0.788293		1.9829	12.9297	1.82954	0.907312		1.48045	8.93587	1.31478	0.557886		1.91697	8.11128	1.68063	0.968866
	42	3.40068	4.12413	2.5761	0.849364		3.32946	4.1899	2.53482	0.881713		3.02807	4.34569	2.33128	0.950466		3.2598	4.35761	2.51173	0.936653		2.1675	23.3567	2.0747	0.785143		1.9808	12.916	1.82744	0.90627		1.48247	8.94809	1.3168	0.558745		1.91507	8.10324	1.67873	0.96777
	42.3	3.40192	4.12565	2.57735	0.849776		3.32944	4.18987	2.5348	0.881706		3.02992	4.34834	2.33312	0.95122		3.2584	4.35574	2.51033	0.936131		2.15813	23.2557	2.06533	0.781595		1.97802	12.8979	1.82466	0.904892		1.48293	8.95081	1.31725	0.558936		1.91427	8.09986	1.67793	0.967309
	42.6	3.4033	4.12731	2.57872	0.850229		3.33202	4.19312	2.53738	0.882604		3.03012	4.34863	2.33332	0.951302		3.2601	4.35801	2.51203	0.936765		2.14895	23.1568	2.05615	0.778123		1.97658	12.8885	1.82322	0.904178		1.48025	8.93466	1.31458	0.557801		1.9159	8.10677	1.67957	0.968251
	42.9	3.40495	4.12931	2.58037	0.850773		3.33384	4.19541	2.5392	0.883237		3.02707	4.34425	2.33027	0.950059		3.26007	4.35797	2.512	0.936753		2.14043	23.0649	2.04763	0.774896		1.97624	12.8863	1.82288	0.904009		1.47558	8.90644	1.3099	0.555817		1.91753	8.11368	1.6812	0.969192
	43.2	3.406	4.13059	2.58142	0.85112		3.3327	4.19397	2.53806	0.88284		3.03055	4.34924	2.33375	0.951475		3.26143	4.3598	2.51336	0.937263		2.13125	22.9661	2.03845	0.771424		1.9725	12.8619	1.81914	0.902154		1.4758	8.9078	1.31012	0.555913		1.91533	8.10437	1.679	0.967924
	43.5	3.407	4.1318	2.58242	0.851449		3.33432	4.19601	2.53968	0.883404		3.03195	4.35125	2.33515	0.952046		3.26333	4.36234	2.51526	0.937971		2.1221	22.8675	2.0293	0.767962		1.9699	12.8449	1.81654	0.900865		1.47415	8.89784	1.30848	0.555213		1.91723	8.11241	1.6809	0.96902
	43.8	3.40883	4.13401	2.58425	0.852051		3.33528	4.19722	2.54064	0.883738		3.03297	4.35272	2.33617	0.952464		3.2696	4.37071	2.52153	0.940308		2.11335	22.7732	2.02055	0.76465		1.96842	12.8353	1.81506	0.900131		1.47293	8.89045	1.30725	0.554693		1.9243	8.14231	1.68797	0.973093
	44.1	3.41047	4.13601	2.58589	0.852595		3.3361	4.19825	2.54146	0.884023		3.03377	4.35387	2.33697	0.95279		3.26413	4.36341	2.51606	0.938269		2.10297	22.6614	2.01017	0.760724		1.96386	12.8056	1.8105	0.89787		1.4705	8.87581	1.30482	0.553664		1.9205	8.12623	1.68417	0.970903
	44.4	3.41045	4.13598	2.58587	0.852587		3.33886	4.20173	2.54422	0.884983		3.0338	4.3539	2.337	0.9528		3.26603	4.36595	2.51796	0.938978		2.09178	22.5407	1.99897	0.756485		1.9606	12.7843	1.80724	0.896253		1.46745	8.8574	1.30177	0.55237		1.91887	8.11932	1.68253	0.969961
	44.7	3.41167	4.13747	2.5871	0.852991		3.33852	4.2013	2.54388	0.884865		3.03337	4.35329	2.33657	0.952627		3.26497	4.36452	2.5169	0.93858		2.08202	22.4356	1.98923	0.752796		1.95688	12.76	1.80352	0.894408		1.4705	8.87581	1.30482	0.553664		1.91533	8.10437	1.679	0.967924
	45	3.4131	4.1392	2.58852	0.85346		3.33954	4.20258	2.5449	0.88522		3.03602	4.3571	2.33922	0.953707		3.26633	4.36635	2.51826	0.93909		2.07083	22.3149	1.97802	0.748557		1.9549	12.7471	1.80154	0.893426		1.47293	8.89045	1.30725	0.554693		1.91373	8.0976	1.6774	0.967002
	45.3	3.41595	4.14265	2.59137	0.8544		3.34034	4.20359	2.5457	0.885498		3.03337	4.35329	2.33657	0.952627		3.26523	4.36488	2.51716	0.93868		2.06145	22.2139	1.96865	0.745009		1.95198	12.7281	1.79862	0.891978		1.46925	8.86827	1.30357	0.553133		1.91263	8.09295	1.6763	0.966368
	45.6	3.41515	4.14168	2.59057	0.854136		3.34116	4.20462	2.54652	0.885783		3.0348	4.35534	2.338	0.953208		3.2674	4.36777	2.51933	0.939488		2.05025	22.0932	1.95745	0.740771		1.94758	12.6994	1.79422	0.889796		1.4709	8.87823	1.30523	0.553834		1.91047	8.08378	1.67413	0.965119
	45.9	3.4174	4.14441	2.59282	0.854878		3.34212	4.20583	2.54748	0.886117		3.0348	4.35534	2.338	0.953208		3.26797	4.36853	2.5199	0.939699		2.04195	22.0038	1.94915	0.73763		1.9422	12.6643	1.78884	0.887128		1.47107	8.87928	1.3054	0.553908		1.91043	8.08364	1.6741	0.965099
	46.2	3.42207	4.15008	2.59749	0.85642		3.34572	4.21036	2.55108	0.887369		3.03443	4.3548	2.33763	0.953055		3.2701	4.37138	2.52203	0.940494		2.0348	21.9267	1.942	0.734924		1.94108	12.657	1.78772	0.886572		1.4715	8.88185	1.30583	0.554088		1.911	8.08604	1.67467	0.965426
	46.5	3.41922	4.14663	2.59464	0.85548		3.34536	4.20991	2.55072	0.887244		3.0362	4.35735	2.3394	0.953779		3.2682	4.36884	2.52013	0.939786		2.0234	21.8039	1.9306	0.73061		1.93536	12.6197	1.782	0.883736		1.47435	8.89905	1.30868	0.555297		1.9072	8.06996	1.67087	0.963235
	46.8	3.42085	4.1486	2.59627	0.856016		3.3462	4.21096	2.55156	0.887536		3.03725	4.35885	2.34045	0.954207		3.26957	4.37067	2.5215	0.940296		2.01302	21.6921	1.92023	0.726684		1.93292	12.6038	1.77956	0.882526		1.47335	8.89301	1.30767	0.554873		1.90557	8.06305	1.66923	0.962294
	47.1	3.42205	4.15005	2.59747	0.856411		3.34766	4.2128	2.55302	0.888044		3.03642	4.35767	2.33962	0.953871		3.27037	4.37174	2.5223	0.940594		2.001	21.5625	1.9082	0.722133		1.92852	12.5751	1.77516	0.880344		1.4715	8.88185	1.30583	0.554088		1.90583	8.06417	1.6695	0.962448
	47.4	3.42307	4.1513	2.5985	0.856749		3.35058	4.21648	2.55594	0.88906		3.0385	4.36065	2.3417	0.954717		3.26957	4.37067	2.5215	0.940296		1.989	21.4332	1.8962	0.717592		1.9277	12.5698	1.77434	0.879937		1.47192	8.88441	1.30625	0.554268		1.90393	8.05614	1.6676	0.961352
	47.7	3.42552	4.15427	2.60094	0.857557		3.34894	4.21441	2.5543	0.888489		3.03765	4.35943	2.34085	0.95437		3.27283	4.37504	2.52476	0.941514		1.98047	21.3413	1.88767	0.714365		1.92462	12.5497	1.77126	0.878409		1.46825	8.86223	1.30258	0.552709		1.9042	8.05726	1.66787	0.961506
	48	3.42572	4.15451	2.60114	0.857623		3.35108	4.2171	2.55644	0.889234		3.03868	4.3609	2.34187	0.954788		3.27257	4.37468	2.5245	0.941414		1.9709	21.2381	1.8781	0.710742		1.92134	12.5283	1.76798	0.876783		1.46825	8.86223	1.30258	0.552709		1.90367	8.05501	1.66733	0.961198
	48.3	3.42735	4.15648	2.60277	0.858159		3.35074	4.21668	2.5561	0.889115		3.0401	4.36294	2.3433	0.955369		3.27253	4.37464	2.52446	0.941402		1.96055	21.1266	1.86775	0.706825		1.91662	12.4975	1.76326	0.874442		1.4648	8.84141	1.29913	0.551245		1.90453	8.05867	1.6682	0.961698
	48.6	3.4306	4.16042	2.60602	0.85923		3.35174	4.21794	2.5571	0.889463		3.03927	4.36176	2.34247	0.955032		3.2731	4.37539	2.52503	0.941613		1.95115	21.0253	1.85835	0.703268		1.9124	12.47	1.75904	0.872349		1.46235	8.82662	1.29668	0.550206		1.90203	8.0481	1.6657	0.960257
	48.9	3.43043	4.16021	2.60584	0.859173		3.35206	4.21834	2.55742	0.889575		3.0399	4.36266	2.3431	0.955287		3.27417	4.37682	2.5261	0.942011		1.93893	20.8936	1.84613	0.698641		1.90622	12.4297	1.75286	0.869284		1.46355	8.83386	1.29787	0.550715		1.89933	8.03667	1.663	0.9587
	49.2	3.4367	4.16782	2.61212	0.861242		3.35124	4.21731	2.5566	0.889289		3.0411	4.36438	2.3443	0.955777		3.27253	4.37464	2.52446	0.941402		1.9318	20.8168	1.839	0.695945		1.90248	12.4053	1.74912	0.86743		1.46155	8.82179	1.29588	0.549866		1.89553	8.02059	1.6592	0.95651
	49.5	3.43205	4.16218	2.60747	0.859708		3.3545	4.22141	2.55986	0.890423		3.04053	4.36355	2.34373	0.955542		3.27637	4.37976	2.5283	0.942831		1.91698	20.6571	1.82418	0.690335		1.89908	12.3832	1.74572	0.865744		1.4589	8.80579	1.29323	0.548742		1.89743	8.02863	1.6611	0.957605
	49.8	3.43385	4.16436	2.60927	0.860302		3.35514	4.22221	2.5605	0.890646		3.04113	4.36442	2.34432	0.955787		3.2766	4.38007	2.52853	0.942918		1.9052	20.5302	1.8124	0.685879		1.89518	12.3577	1.74182	0.863809		1.4589	8.80579	1.29323	0.548742		1.8966	8.02511	1.66027	0.957125
	50.1	3.43427	4.16488	2.60969	0.860442		3.3558	4.22304	2.56116	0.890875		3.0415	4.36495	2.3447	0.95594		3.2766	4.38007	2.52853	0.942918		1.89175	20.3852	1.79895	0.680789		1.89108	12.331	1.73772	0.861776		1.45542	8.78482	1.28975	0.547267		1.8985	8.03315	1.66217	0.95822
	50.4	3.4351	4.16588	2.61052	0.860714		3.3566	4.22405	2.56196	0.891154		3.04153	4.36499	2.34472	0.95595		3.27853	4.38266	2.53046	0.943639		1.87932	20.2513	1.78652	0.676087		1.88636	12.3002	1.733	0.859435		1.45423	8.77758	1.28855	0.546758		1.8988	8.03441	1.66247	0.958393
	50.7	3.4371	4.1683	2.61252	0.861374		3.35826	4.22614	2.56362	0.891731		3.04232	4.36614	2.34552	0.956276		3.2766	4.38007	2.52853	0.942918		1.87098	20.1614	1.77818	0.672927		1.8826	12.2757	1.72924	0.857571		1.4536	8.7738	1.28792	0.546493		1.89583	8.02186	1.6595	0.956683
	51	3.43792	4.1693	2.61334	0.861646		3.3594	4.22757	2.56476	0.892128		3.04113	4.36442	2.34432	0.955787		3.27853	4.38266	2.53046	0.943639		1.86	20.0431	1.7672	0.668773		1.8797	12.2568	1.72634	0.856133		1.45095	8.75781	1.28527	0.545368		1.89663	8.02525	1.6603	0.957144
	51.3	3.43812	4.16955	2.61354	0.861711		3.36086	4.22941	2.56622	0.892636		3.04355	4.3679	2.34675	0.956775		3.28017	4.38484	2.5321	0.944248		1.84695	19.9025	1.75415	0.663835		1.87548	12.2293	1.72212	0.85404		1.452	8.76415	1.28632	0.545814		1.89773	8.0299	1.6614	0.957778
	51.6	3.441	4.17303	2.61642	0.862659		3.36054	4.22901	2.5659	0.892524		3.04475	4.36962	2.34795	0.957265		3.27883	4.38306	2.53076	0.943751		1.83702	19.7955	1.74422	0.660079		1.8709	12.1994	1.71754	0.851768		1.4489	8.74544	1.28323	0.544498		1.89117	8.00212	1.65483	0.953992
	51.9	3.4416	4.17376	2.61702	0.862857		3.36278	4.23183	2.56814	0.893303		3.04335	4.36761	2.34655	0.956694		3.2815	4.38662	2.53343	0.944746		1.825	19.6659	1.7322	0.655528		1.86716	12.175	1.7138	0.849914		1.4479	8.7394	1.28222	0.544074		1.89283	8.00917	1.6565	0.954953
	52.2	3.4418	4.174	2.61722	0.862923		3.36344	4.23266	2.5688	0.893533		3.04415	4.36876	2.34735	0.95702		3.2815	4.38662	2.53343	0.944746		1.814	19.5474	1.7212	0.651365		1.86162	12.1389	1.70826	0.847166		1.44808	8.74046	1.2824	0.544148		1.89173	8.00451	1.6554	0.954319
	52.5	3.44485	4.1777	2.62027	0.863929		3.36376	4.23306	2.56912	0.893644		3.04478	4.36965	2.34797	0.957275		3.27717	4.38083	2.5291	0.94313		1.80585	19.4596	1.71305	0.648281		1.86016	12.1294	1.7068	0.846442		1.44565	8.72582	1.27998	0.543119		1.889	7.99295	1.65267	0.952743
	52.8	3.44585	4.17892	2.62127	0.864258		3.36558	4.23535	2.57094	0.894277		3.04418	4.36879	2.34737	0.95703		3.2818	4.38702	2.53373	0.944858		1.79465	19.3389	1.70185	0.644042		1.85804	12.1155	1.70468	0.845391		1.44385	8.71495	1.27818	0.542356		1.89257	8.00804	1.65623	0.954799
	53.1	3.44588	4.17895	2.62129	0.864267		3.36606	4.23596	2.57142	0.894444		3.046	4.37141	2.3492	0.957774		3.28503	4.39134	2.53696	0.946063		1.78327	19.2163	1.69047	0.639738		1.85494	12.0953	1.70158	0.843854		1.44465	8.71978	1.27897	0.542695		1.89337	8.01142	1.65703	0.955261
	53.4	3.4475	4.18092	2.62292	0.864802		3.36752	4.23779	2.57288	0.894952		3.047	4.37285	2.3502	0.958182		3.28097	4.38591	2.5329	0.944547		1.7725	19.1002	1.6797	0.63566		1.85268	12.0806	1.69932	0.842733		1.44382	8.7148	1.27815	0.542345		1.88903	7.99309	1.6527	0.952763
	53.7	3.45052	4.18458	2.62595	0.8658		3.36834	4.23883	2.5737	0.895237		3.04497	4.36994	2.34817	0.957356		3.2845	4.39063	2.53643	0.945864		1.76147	18.9814	1.66867	0.631488		1.84648	12.0402	1.69312	0.839658		1.44322	8.71118	1.27755	0.54209		1.88957	7.99535	1.65323	0.95307
	54	3.45198	4.18634	2.62739	0.866278		3.36832	4.2388	2.57368	0.89523		3.0472	4.37313	2.3504	0.958264		3.28423	4.39028	2.53616	0.945765		1.74808	18.837	1.65528	0.626417		1.84094	12.004	1.68758	0.836911		1.44283	8.70877	1.27715	0.541921		1.88793	7.98843	1.6516	0.952128
	54.3	3.45098	4.18513	2.6264	0.865948		3.36898	4.23963	2.57434	0.89546		3.0464	4.37199	2.3496	0.957937		3.28583	4.39241	2.53776	0.946362		1.73503	18.6964	1.64223	0.621478		1.83704	11.9786	1.68368	0.834976		1.442	8.70379	1.27632	0.541571		1.88983	7.99647	1.6535	0.953224
	54.6	3.45323	4.18786	2.62865	0.86669		3.3708	4.24192	2.57616	0.896093		3.047	4.37285	2.3502	0.958182		3.2845	4.39063	2.53643	0.945864		1.72505	18.5889	1.63225	0.617703		1.83312	11.9531	1.67976	0.833032		1.4426	8.70741	1.27693	0.541825		1.88633	7.98166	1.65	0.951206
	54.9	3.4552	4.19025	2.63062	0.867341		3.37044	4.24147	2.5758	0.895968		3.04845	4.37493	2.35165	0.958773		3.2853	4.3917	2.53723	0.946163		1.71307	18.4599	1.62027	0.613171		1.82692	11.9126	1.67356	0.829958		1.44182	8.70273	1.27615	0.541496		1.88277	7.96657	1.64643	0.94915
	55.2	3.45485	4.18983	2.63027	0.867226		3.37372	4.2456	2.57908	0.897109		3.04885	4.3755	2.35205	0.958936		3.28663	4.39348	2.53856	0.94666		1.70105	18.3303	1.60825	0.608621		1.82286	11.8862	1.6695	0.827944		1.44097	8.6976	1.2753	0.541136		1.88357	7.96996	1.64723	0.949611
	55.5	3.45768	4.19326	2.63309	0.868157		3.37386	4.24577	2.57922	0.897157		3.04885	4.3755	2.35205	0.958936		3.28717	4.3942	2.5391	0.946859		1.6917	18.2295	1.5989	0.605082		1.817	11.8479	1.66364	0.825038		1.4416	8.70137	1.27592	0.541401		1.88197	7.96319	1.64563	0.948689
	55.8	3.4589	4.19474	2.63432	0.868561		3.37418	4.24617	2.57954	0.897269		3.04882	4.37547	2.35202	0.958926		3.28747	4.3946	2.5394	0.946971		1.68332	18.1393	1.59052	0.601913		1.80952	11.7992	1.65616	0.821329		1.43855	8.68296	1.27287	0.540107		1.8836	7.9701	1.64727	0.94963
	56.1	3.46073	4.19695	2.63614	0.869163		3.37616	4.24867	2.58152	0.897957		3.04905	4.37579	2.35225	0.959018		3.28803	4.39536	2.53996	0.947182		1.67215	18.0189	1.57935	0.597684		1.8082	11.7906	1.65484	0.820674		1.43833	8.68161	1.27265	0.540011		1.88307	7.96784	1.64673	0.949323
	56.4	3.46275	4.19941	2.63817	0.869831		3.37518	4.24743	2.58054	0.897617		3.05048	4.37783	2.35367	0.959599		3.2891	4.39678	2.54103	0.94758		1.6622	17.9116	1.5694	0.593919		1.80236	11.7525	1.649	0.817778		1.43548	8.6644	1.2698	0.538802		1.88173	7.9622	1.6454	0.948554
	56.7	3.46295	4.19965	2.63837	0.869897		3.37646	4.24904	2.58182	0.898062		3.05068	4.37812	2.35387	0.95968		3.28883	4.39642	2.54076	0.94748		1.64878	17.767	1.55598	0.588838		1.79944	11.7334	1.64608	0.81633		1.43345	8.65218	1.26778	0.537943		1.8809	7.95867	1.64457	0.948074
	57	3.46437	4.20138	2.63979	0.870366		3.37812	4.25113	2.58348	0.898639		3.05048	4.37783	2.35367	0.959599		3.29043	4.39856	2.54236	0.948077		1.63817	17.6527	1.54537	0.584827		1.79586	11.7101	1.6425	0.814554		1.43265	8.64735	1.26697	0.537603		1.88143	7.96093	1.6451	0.948381
	57.3	3.46585	4.20317	2.64127	0.870853		3.37696	4.24967	2.58232	0.898236		3.05068	4.37812	2.35387	0.95968		3.2899	4.39785	2.54183	0.947878		1.62332	17.4927	1.53052	0.579207		1.78998	11.6718	1.63662	0.811638		1.43122	8.63875	1.26555	0.536999		1.87793	7.94612	1.6416	0.946364
	57.6	3.46765	4.20535	2.64307	0.871446		3.37942	4.25277	2.58478	0.899091		3.05068	4.37812	2.35387	0.95968		3.28963	4.39749	2.54156	0.947779		1.6105	17.3545	1.5177	0.574353		1.78722	11.6538	1.63386	0.81027		1.42918	8.62638	1.2635	0.536129		1.87817	7.94711	1.64183	0.946498
	57.9	3.46928	4.20732	2.6447	0.871982		3.38168	4.25561	2.58704	0.899878		3.0513	4.37902	2.3545	0.959935		3.29043	4.39856	2.54236	0.948077		1.5995	17.236	1.5067	0.570191		1.78394	11.6324	1.63058	0.808643		1.42817	8.62034	1.2625	0.535704		1.876	7.93794	1.63967	0.945249
	58.2	3.4709	4.20929	2.64632	0.872518		3.38022	4.25378	2.58558	0.89937		3.05187	4.37984	2.35507	0.96017		3.291	4.39932	2.54293	0.948288		1.58953	17.1285	1.49673	0.566416		1.77646	11.5836	1.6231	0.804933		1.42775	8.61778	1.26208	0.535524		1.87413	7.93004	1.6378	0.944173
	58.5	3.47213	4.21078	2.64755	0.872922		3.38268	4.25687	2.58804	0.900225		3.05125	4.37895	2.35445	0.959915		3.29183	4.40043	2.54376	0.948599		1.58018	17.0277	1.48737	0.562877		1.77386	11.5666	1.6205	0.803644		1.4247	8.59937	1.25903	0.53423		1.87083	7.91608	1.6345	0.94227
	58.8	3.47253	4.21127	2.64794	0.873053		3.38328	4.25763	2.58864	0.900434		3.0521	4.38017	2.3553	0.960261		3.29047	4.39861	2.5424	0.948089		1.57102	16.9291	1.47822	0.559415		1.76962	11.539	1.61626	0.801541		1.42368	8.59318	1.258	0.533795		1.8695	7.91044	1.63317	0.941502
	59.1	3.47335	4.21227	2.64877	0.873325		3.38416	4.25873	2.58952	0.90074		3.05295	4.38139	2.35615	0.960608		3.29183	4.40043	2.54376	0.948599		1.55802	16.7891	1.46522	0.554495		1.7659	11.5147	1.61254	0.799696		1.42083	8.57598	1.25515	0.532586		1.86867	7.90691	1.63233	0.941021
	59.4	3.47515	4.21445	2.65057	0.873919		3.38394	4.25846	2.5893	0.900664		3.0531	4.3816	2.3563	0.960669		3.29343	4.40257	2.54536	0.949196		1.54865	16.688	1.45585	0.550947		1.75808	11.4637	1.60472	0.795818		1.4194	8.56738	1.25372	0.531981		1.87087	7.91622	1.63453	0.94229
	59.7	3.47598	4.21545	2.65139	0.874191		3.38478	4.25951	2.59014	0.900956		3.05333	4.38192	2.35652	0.960761		3.29343	4.40257	2.54536	0.949196		1.53828	16.5762	1.44548	0.547021		1.75222	11.4255	1.59886	0.792912		1.418	8.55893	1.25232	0.531387		1.8703	7.91382	1.63397	0.941963
	60	3.4766	4.21621	2.65202	0.874397		3.38672	4.26196	2.59208	0.901631		3.05455	4.38368	2.35775	0.96126		3.2937	4.40293	2.54563	0.949295		1.52622	16.4464	1.43342	0.542461		1.75158	11.4214	1.59822	0.792595		1.41778	8.55757	1.2521	0.531292		1.86897	7.90818	1.63263	0.941194
	60.3	3.47783	4.21769	2.65325	0.874801		3.38756	4.26301	2.59292	0.901923		3.05518	4.38458	2.35838	0.961515		3.2956	4.40547	2.54753	0.950004		1.51385	16.313	1.42105	0.537777		1.7467	11.3895	1.59334	0.790175		1.41413	8.53554	1.24845	0.529743		1.8676	7.9024	1.63127	0.940406
	60.6	3.47945	4.21966	2.65487	0.875337		3.38802	4.26359	2.59338	0.902083		3.05515	4.38454	2.35835	0.961505		3.29507	4.40476	2.547	0.949805		1.50388	16.2055	1.41108	0.534003		1.73758	11.3301	1.58422	0.785652		1.40905	8.5049	1.24337	0.527589		1.86513	7.89196	1.6288	0.938984
	60.9	3.4817	4.22239	2.65712	0.876079		3.38952	4.26548	2.59488	0.902605		3.05658	4.38659	2.35977	0.962086		3.29563	4.40551	2.54756	0.950016		1.49267	16.0849	1.39987	0.529764		1.73284	11.2992	1.57948	0.783301		1.40863	8.50234	1.24295	0.527409		1.86247	7.88068	1.62613	0.937447
	61.2	3.4827	4.2236	2.65812	0.876408		3.39306	4.26993	2.59842	0.903836		3.05638	4.3863	2.35957	0.962004		3.2983	4.40908	2.55023	0.951011		1.47905	15.938	1.38625	0.524608		1.72878	11.2727	1.57542	0.781288		1.4076	8.49615	1.24192	0.526974		1.8627	7.88166	1.62637	0.937582
	61.5	3.4835	4.22457	2.65892	0.876672		3.39194	4.26852	2.5973	0.903446		3.05638	4.3863	2.35957	0.962004		3.2959	4.40587	2.54783	0.950116		1.46785	15.8173	1.37505	0.520369		1.72146	11.225	1.5681	0.777658		1.40558	8.48393	1.2399	0.526115		1.86107	7.87475	1.62473	0.93664
	61.8	3.48495	4.22633	2.66037	0.87715		3.39452	4.27177	2.59988	0.904344		3.05618	4.38601	2.35938	0.961923		3.29833	4.40912	2.55026	0.951023		1.4591	15.7231	1.3663	0.517058		1.71818	11.2036	1.56482	0.776031		1.40272	8.46673	1.23705	0.524905		1.86053	7.8725	1.6242	0.936333
	62.1	3.48637	4.22806	2.6618	0.87762		3.39488	4.27222	2.60024	0.904469		3.05578	4.38544	2.35898	0.96176		3.2975	4.40801	2.54943	0.950712		1.4467	15.5894	1.3539	0.512365		1.712	11.1633	1.55864	0.772966		1.4025	8.46537	1.23683	0.52481		1.85863	7.86446	1.6223	0.935237
	62.4	3.48983	4.23225	2.66525	0.878757		3.39488	4.27222	2.60024	0.904469		3.0576	4.38806	2.3608	0.962504		3.29887	4.40984	2.5508	0.951222		1.4377	15.4925	1.3449	0.508959		1.70842	11.1399	1.55506	0.771191		1.40112	8.45707	1.23545	0.524227		1.8589	7.86559	1.62257	0.935391
	62.7	3.48985	4.23228	2.66527	0.878766		3.3973	4.27527	2.60266	0.905311		3.05678	4.38688	2.35997	0.962167		3.29833	4.40912	2.55026	0.951023		1.4237	15.3416	1.3309	0.503661		1.70174	11.0964	1.54838	0.767878		1.39745	8.43489	1.23178	0.522667		1.8567	7.85628	1.62037	0.934123
	63	3.49023	4.23273	2.66565	0.878889		3.39684	4.27469	2.6022	0.905151		3.05678	4.38688	2.35997	0.962167		3.2994	4.41055	2.55133	0.951421		1.41005	15.1945	1.31725	0.498496		1.69572	11.0571	1.54236	0.764893		1.3956	8.42372	1.22992	0.521882		1.85347	7.8426	1.61713	0.932259
	63.3	3.49388	4.23716	2.66929	0.880093		3.3978	4.2759	2.60316	0.905485		3.0574	4.38777	2.3606	0.962422		3.29913	4.41019	2.55106	0.951321		1.39823	15.0671	1.30543	0.494021		1.69294	11.039	1.53958	0.763514		1.39377	8.41271	1.2281	0.521108		1.85293	7.84034	1.6166	0.931951
	63.6	3.49205	4.23494	2.66747	0.879491		3.39894	4.27733	2.6043	0.905881		3.06165	4.39387	2.36485	0.964155		3.30077	4.41238	2.5527	0.95193		1.385	14.9246	1.2922	0.489016		1.6866	10.9977	1.53324	0.76037		1.39457	8.41753	1.2289	0.521447		1.85107	7.83244	1.61473	0.930875
	63.9	3.4941	4.23743	2.66952	0.880167		3.3991	4.27753	2.60446	0.905937		3.05983	4.39125	2.36302	0.963411		3.3	4.41135	2.55193	0.951645		1.37525	14.8195	1.28245	0.485326		1.67976	10.9531	1.5264	0.756978		1.39233	8.40395	1.22665	0.520493		1.84427	7.80367	1.60793	0.926955
	64.2	3.49512	4.23867	2.67055	0.880505		3.39958	4.27814	2.60494	0.906104		3.0588	4.38978	2.362	0.962993		3.30077	4.41238	2.5527	0.95193		1.36427	14.7012	1.27147	0.481173		1.67442	10.9182	1.52106	0.754329		1.39112	8.39671	1.22545	0.519983		1.84047	7.78759	1.60413	0.924764
	64.5	3.49553	4.23916	2.67095	0.880637		3.40022	4.27894	2.60558	0.906327		3.05923	4.39039	2.36242	0.963166		3.3008	4.41242	2.55273	0.951943		1.35265	14.576	1.25985	0.476773		1.66918	10.8841	1.51582	0.751731		1.3893	8.38569	1.22362	0.519209		1.83803	7.77729	1.6017	0.923362
	64.8	3.49858	4.24286	2.674	0.881642		3.40022	4.27894	2.60558	0.906327		3.06045	4.39215	2.36365	0.963666		3.30133	4.41313	2.55326	0.952142		1.34268	14.4685	1.24988	0.472999		1.66218	10.8384	1.50882	0.748259		1.39092	8.3955	1.22525	0.519899		1.8361	7.76911	1.59977	0.922247
	65.1	3.49795	4.2421	2.67337	0.881436		3.40106	4.28	2.60642	0.906619		3.06082	4.39269	2.36402	0.963818		3.3016	4.41349	2.55353	0.952241		1.32947	14.3262	1.23667	0.468003		1.6573	10.8066	1.50394	0.745839		1.38908	8.38434	1.2234	0.519114		1.835	7.76446	1.59867	0.921613
	65.4	3.49958	4.24407	2.675	0.881972		3.4027	4.28206	2.60806	0.907189		3.06002	4.39154	2.36322	0.963492		3.30293	4.41527	2.55486	0.952738		1.31785	14.201	1.22505	0.463604		1.65276	10.777	1.4994	0.743588		1.38688	8.37106	1.2212	0.51818		1.83423	7.76121	1.5979	0.921171
	65.7	3.50285	4.24804	2.67827	0.883052		3.40268	4.28204	2.60804	0.907182		3.06188	4.39419	2.36508	0.964247		3.30213	4.4142	2.55406	0.95244		1.30933	14.1091	1.21653	0.460378		1.64592	10.7324	1.49256	0.740196		1.38787	8.37709	1.2222	0.518604		1.83207	7.75205	1.59573	0.919922
	66	3.50327	4.24856	2.67869	0.883192		3.4056	4.28571	2.61096	0.908198		3.06105	4.39301	2.36425	0.96391		3.3027	4.41496	2.55463	0.952651		1.2971	13.9774	1.2043	0.455751		1.64182	10.7057	1.48846	0.738162		1.38542	8.36231	1.21975	0.517565		1.83067	7.74612	1.59433	0.919115
	66.3	3.50122	4.24607	2.67665	0.882516		3.40608	4.28632	2.61144	0.908365		3.06208	4.39448	2.36528	0.964328		3.3035	4.41603	2.55543	0.95295		1.2837	13.833	1.1909	0.45068		1.63564	10.6654	1.48228	0.735097		1.38177	8.34027	1.2161	0.516016		1.82633	7.72779	1.59	0.916617
	66.6	3.50493	4.25056	2.68034	0.883736		3.4051	4.28509	2.61046	0.908024		3.0629	4.39567	2.3661	0.964664		3.30483	4.41781	2.55676	0.953447		1.2727	13.7144	1.1799	0.446517		1.63028	10.6304	1.47692	0.732439		1.37813	8.31824	1.21245	0.514467		1.8277	7.73357	1.59137	0.917405
	66.9	3.5067	4.25271	2.68212	0.884321		3.4071	4.2876	2.61246	0.90872		3.0633	4.39624	2.3665	0.964828		3.30567	4.41893	2.5576	0.953758		1.2631	13.611	1.1703	0.442884		1.62492	10.5955	1.47156	0.729781		1.37445	8.29606	1.20877	0.512908		1.82607	7.72666	1.58973	0.916463
	67.2	3.50875	4.2552	2.68417	0.884997		3.4071	4.2876	2.61246	0.90872		3.0639	4.3971	2.3671	0.965072		3.30593	4.41928	2.55786	0.953857		1.25192	13.4906	1.15912	0.438655		1.61872	10.555	1.46536	0.726706		1.37403	8.2935	1.20835	0.512727		1.82633	7.72779	1.59	0.916617
	67.5	3.51037	4.25717	2.6858	0.885533		3.40806	4.28881	2.61342	0.909054		3.06413	4.39742	2.36733	0.965164		3.30787	4.42187	2.5598	0.954578		1.24235	13.3874	1.14955	0.435032		1.61224	10.5128	1.45888	0.723493		1.37098	8.27509	1.2053	0.511433		1.82527	7.72327	1.58893	0.916002
	67.8	3.51158	4.25862	2.687	0.885929		3.411	4.29251	2.61636	0.910076		3.0633	4.39624	2.3665	0.964828		3.3062	4.41964	2.55813	0.953957		1.23075	13.2624	1.13795	0.430642		1.607	10.4786	1.45364	0.720894		1.36955	8.26649	1.20388	0.510829		1.8209	7.7048	1.58457	0.913484
	68.1	3.51262	4.2599	2.68804	0.886275		3.41032	4.29165	2.61568	0.90984		3.0639	4.3971	2.3671	0.965072		3.3073	4.42111	2.55923	0.954367		1.2204	13.1509	1.1276	0.426725		1.60132	10.4416	1.44796	0.718077		1.36813	8.25788	1.20245	0.510224		1.81957	7.69915	1.58323	0.912716
	68.4	3.51385	4.26138	2.68927	0.886679		3.40984	4.29105	2.6152	0.909673		3.06453	4.398	2.36773	0.965327		3.30837	4.42254	2.5603	0.954765		1.20978	13.0364	1.11698	0.422704		1.59754	10.4169	1.44418	0.716203		1.3645	8.236	1.19883	0.508686		1.81713	7.68886	1.5808	0.911313
	68.7	3.51505	4.26284	2.69047	0.887074		3.4136	4.29578	2.61896	0.910981		3.06697	4.40151	2.37018	0.966326		3.30863	4.42289	2.56056	0.954864		1.1972	12.9009	1.1044	0.417945		1.59414	10.3948	1.44078	0.714517		1.36528	8.24068	1.1996	0.509015		1.8179	7.6921	1.58157	0.911755
	69	3.5175	4.26581	2.69292	0.887882		3.41294	4.29495	2.6183	0.910751		3.06573	4.39972	2.36892	0.965816		3.30943	4.42396	2.56136	0.955162		1.18762	12.7977	1.09482	0.414322		1.58796	10.3545	1.4346	0.711452		1.3606	8.21246	1.19493	0.507031		1.81577	7.68307	1.57943	0.910525
	69.3	3.5179	4.26629	2.69332	0.888014		3.4149	4.29742	2.62026	0.911433		3.06575	4.39976	2.36895	0.965826		3.30917	4.42361	2.5611	0.955063		1.17562	12.6684	1.08282	0.409781		1.58486	10.3342	1.4315	0.709915		1.35633	8.18666	1.19065	0.505217		1.81357	7.67377	1.57723	0.909257
	69.6	3.52177	4.27099	2.69719	0.889292		3.41538	4.29802	2.62074	0.9116		3.06493	4.39857	2.36813	0.96549		3.31027	4.42508	2.5622	0.955473		1.1697	12.6045	1.0769	0.407538		1.57526	10.2716	1.4219	0.705154		1.3539	8.17202	1.18823	0.504188		1.8136	7.67391	1.57727	0.909276
	69.9	3.51995	4.26878	2.69537	0.88869		3.41378	4.29601	2.61914	0.911043		3.06672	4.40116	2.36992	0.966224		3.30947	4.42401	2.5614	0.955175		1.15915	12.4908	1.06635	0.403546		1.566	10.2113	1.41264	0.700561		1.35062	8.15226	1.18495	0.502798		1.81113	7.66347	1.5748	0.907854
	70.2	3.51912	4.26778	2.69455	0.888418		3.4162	4.29905	2.62156	0.911885		3.06632	4.40058	2.36952	0.966061		3.31137	4.42655	2.5633	0.955883		1.14815	12.3723	1.05535	0.399383		1.55996	10.1719	1.4066	0.697566		1.3488	8.14124	1.18312	0.502024		1.8087	7.65317	1.57237	0.906451
	70.5	3.52217	4.27148	2.6976	0.889424		3.41474	4.29722	2.6201	0.911377		3.06675	4.40119	2.36995	0.966234		3.31057	4.42548	2.5625	0.955585		1.14003	12.2848	1.04723	0.396308		1.55214	10.1209	1.39878	0.693688		1.34882	8.14139	1.18315	0.502035		1.806	7.64175	1.56967	0.904895
	70.8	3.5232	4.27272	2.69862	0.889762		3.41634	4.29923	2.6217	0.911934		3.06778	4.40266	2.37098	0.966652		3.3108	4.42579	2.56273	0.955672		1.13045	12.1816	1.03765	0.392685		1.54676	10.0858	1.3934	0.69102		1.34535	8.12042	1.17968	0.50056		1.80493	7.63724	1.5686	0.90428
	71.1	3.52382	4.27348	2.69924	0.889968		3.4185	4.30195	2.62386	0.912685		3.06718	4.4018	2.37038	0.966407		3.31247	4.42802	2.5644	0.956294		1.1215	12.0851	1.0287	0.389298		1.54138	10.0507	1.38802	0.688352		1.3415	8.09718	1.17582	0.498926		1.8041	7.63371	1.56777	0.903799
	71.4	3.52648	4.27669	2.70189	0.890841		3.41864	4.30212	2.624	0.912734		3.06695	4.40148	2.37015	0.966316		3.3119	4.42726	2.56383	0.956082		1.11335	11.9973	1.02055	0.386214		1.53294	9.9957	1.37958	0.684166		1.34167	8.09823	1.176	0.499001		1.80243	7.62666	1.5661	0.902839
	71.7	3.52807	4.27863	2.7035	0.891369		3.41948	4.30318	2.62484	0.913026		3.06815	4.4032	2.37135	0.966805		3.31247	4.42802	2.5644	0.956294		1.1036	11.8922	1.0108	0.382524		1.52658	9.95423	1.37322	0.681012		1.34062	8.0919	1.17495	0.498555		1.79977	7.61537	1.56343	0.901301
	72	3.5295	4.28036	2.70492	0.891839		3.4206	4.30459	2.62596	0.913416		3.06715	4.40177	2.37035	0.966397		3.31217	4.42762	2.5641	0.956182		1.09215	11.7689	0.99935	0.378191		1.52006	9.91171	1.3667	0.677779		1.33842	8.07862	1.17275	0.497622		1.79703	7.60381	1.5607	0.899726
	72.3	3.53195	4.28333	2.70737	0.892646		3.42156	4.3058	2.62692	0.913749		3.06898	4.40438	2.37217	0.967141		3.31297	4.42869	2.5649	0.95648		1.08428	11.684	0.991475	0.375211		1.51258	9.86294	1.35922	0.674069		1.33718	8.07107	1.1715	0.497091		1.79353	7.589	1.5572	0.897708
	72.6	3.53218	4.2836	2.70759	0.892721		3.4219	4.30623	2.62726	0.913868		3.06917	4.40467	2.37237	0.967223		3.3108	4.42579	2.56273	0.955672		1.07248	11.5568	0.979675	0.370745		1.50622	9.82147	1.35286	0.670915		1.33537	8.06021	1.1697	0.496328		1.79	7.57405	1.55367	0.895671
	72.9	3.53275	4.2843	2.70817	0.89291		3.4248	4.30988	2.63016	0.914876		3.0682	4.40327	2.3714	0.966825		3.31433	4.43051	2.56626	0.95699		1.06042	11.427	0.967625	0.366185		1.50166	9.79173	1.3483	0.668654		1.33213	8.04059	1.16645	0.494948		1.79	7.57405	1.55367	0.895671
	73.2	3.5342	4.28606	2.70962	0.893388		3.4258	4.31113	2.63116	0.915224		3.06778	4.40266	2.37098	0.966652		3.31247	4.42802	2.5644	0.956294		1.04865	11.3001	0.95585	0.361729		1.4958	9.75352	1.34244	0.665748		1.32885	8.02082	1.16318	0.493559		1.78757	7.56375	1.55123	0.894268
	73.5	3.53602	4.28827	2.71144	0.89399		3.42286	4.30743	2.62822	0.914202		3.06838	4.40352	2.37157	0.966897		3.3135	4.4294	2.56543	0.956679		1.03745	11.1794	0.94465	0.35749		1.48686	9.69523	1.3335	0.661314		1.3266	8.00724	1.16092	0.492604		1.78483	7.55219	1.5485	0.892692
	73.8	3.5362	4.28849	2.71162	0.894048		3.42696	4.31259	2.63232	0.915628		3.0698	4.40557	2.373	0.967478		3.3149	4.43127	2.56683	0.957201		1.02645	11.0609	0.93365	0.353327		1.48378	9.67514	1.33042	0.659787		1.32583	8.00257	1.16015	0.492275		1.78103	7.53611	1.5447	0.890502
	74.1	3.53783	4.29046	2.71325	0.894584		3.42826	4.31423	2.63362	0.91608		3.0702	4.40614	2.3734	0.967641		3.31543	4.43198	2.56736	0.9574		1.01852	10.9755	0.925725	0.350328		1.47874	9.64228	1.32538	0.657287		1.32355	7.98883	1.15787	0.49131		1.77697	7.5189	1.54063	0.888157
	74.4	3.53725	4.28976	2.71267	0.894394		3.42892	4.31506	2.63428	0.91631		3.07023	4.40618	2.37343	0.967651		3.31627	4.4331	2.5682	0.957711		1.0059	10.8394	0.9131	0.345551		1.46976	9.58372	1.3164	0.652834		1.32215	7.98038	1.15647	0.490716		1.7745	7.50846	1.53817	0.886735
	74.7	3.5393	4.29225	2.71472	0.89507		3.42922	4.31544	2.63458	0.916414		3.0708	4.407	2.374	0.967885		3.31733	4.43452	2.56926	0.958108		0.995325	10.7255	0.902525	0.341549		1.46176	9.53156	1.3084	0.648866		1.3199	7.9668	1.15423	0.489761		1.77533	7.51199	1.539	0.887216
	75	3.5411	4.29443	2.71652	0.895663		3.42904	4.31521	2.6344	0.916351		3.07103	4.40733	2.37423	0.967977		3.31623	4.43305	2.56816	0.957698		0.984725	10.6113	0.891925	0.337537		1.45544	9.49035	1.30208	0.645732		1.31583	7.94221	1.15015	0.488032		1.77123	7.49464	1.5349	0.884852
	75.3	3.54415	4.29813	2.71957	0.896669		3.43132	4.31808	2.63668	0.917144		3.0698	4.40557	2.373	0.967478		3.3176	4.43488	2.56953	0.958208		0.9768	10.5259	0.884	0.334538		1.45134	9.46362	1.29798	0.643699		1.3134	7.92757	1.14773	0.487003		1.7672	7.47757	1.53087	0.882527
	75.6	3.545	4.29916	2.72042	0.896949		3.43084	4.31748	2.6362	0.916977		3.07325	4.41052	2.37645	0.968884		3.3184	4.43595	2.57033	0.958506		0.966025	10.4098	0.873225	0.33046		1.44308	9.40975	1.28972	0.639602		1.31115	7.91399	1.14548	0.486048		1.76207	7.45585	1.52573	0.879568
	75.9	3.5462	4.30061	2.72162	0.897345		3.43282	4.31997	2.63818	0.917666		3.07225	4.40908	2.37545	0.968476		3.3176	4.43488	2.56953	0.958208		0.955025	10.2912	0.862225	0.326298		1.43624	9.36515	1.28288	0.63621		1.3075	7.89196	1.14183	0.4845		1.75853	7.4409	1.5222	0.877531
	76.2	3.5482	4.30304	2.72362	0.898004		3.43198	4.31891	2.63734	0.917374		3.07368	4.41113	2.37688	0.969057		3.31893	4.43666	2.57086	0.958705		0.946075	10.1948	0.853275	0.322911		1.4276	9.30882	1.27424	0.631926		1.3026	7.86238	1.13692	0.48242		1.75337	7.41904	1.51703	0.874552
	76.5	3.548	4.3028	2.72342	0.897938		3.43264	4.31974	2.638	0.917604		3.07388	4.41142	2.37708	0.969139		3.3195	4.43742	2.57143	0.958916		0.9365	10.0916	0.8437	0.319287		1.4219	9.27165	1.26854	0.629099		1.30018	7.84774	1.1345	0.481391		1.75093	7.40874	1.5146	0.873149
	76.8	3.54928	4.30434	2.7247	0.898359		3.4351	4.32284	2.64046	0.918459		3.07265	4.40966	2.37585	0.96864		3.32137	4.43991	2.5733	0.959612		0.9292	10.0129	0.8364	0.316524		1.41522	9.22809	1.26186	0.625786		1.2965	7.82556	1.13082	0.479832		1.74847	7.39831	1.51213	0.871727
	77.1	3.54905	4.30407	2.72447	0.898285		3.43672	4.32488	2.64208	0.919023		3.07365	4.41109	2.37685	0.969047		3.32137	4.43991	2.5733	0.959612		0.920025	9.91406	0.827225	0.313052		1.4087	9.18558	1.25534	0.622553		1.29713	7.82933	1.13145	0.480097		1.74467	7.38223	1.50833	0.869537
	77.4	3.55107	4.30653	2.72649	0.898952		3.43572	4.32362	2.64108	0.918675		3.0743	4.41203	2.3775	0.969312		3.3203	4.43849	2.57223	0.959215		0.911675	9.82408	0.818875	0.309892		1.40088	9.13459	1.24752	0.618674		1.29812	7.83537	1.13245	0.480522		1.7428	7.37433	1.50647	0.868461
	77.7	3.55293	4.30877	2.72835	0.899562		3.43754	4.32591	2.6429	0.919308		3.0745	4.41231	2.3777	0.969394		3.32057	4.43884	2.5725	0.959314		0.903325	9.73411	0.810525	0.306732		1.39372	9.0879	1.24036	0.615124		1.2971	7.82918	1.13142	0.480087		1.7417	7.36968	1.50537	0.867827
	78	3.55435	4.3105	2.72977	0.900032		3.43702	4.32525	2.64238	0.919127		3.0755	4.41375	2.3787	0.969801		3.32087	4.43925	2.5728	0.959426		0.896425	9.65975	0.803625	0.304121		1.38626	9.03925	1.2329	0.611424		1.29588	7.82179	1.1302	0.479567		1.7379	7.3536	1.50157	0.865636
	78.3	3.55558	4.31198	2.731	0.900436		3.43706	4.3253	2.64242	0.919141		3.0751	4.41317	2.3783	0.969638		3.32167	4.44032	2.5736	0.959724		0.886675	9.55469	0.793875	0.300431		1.37778	8.98396	1.22442	0.607219		1.29405	7.81077	1.12837	0.478792		1.73763	7.35247	1.5013	0.865482
	78.6	3.558	4.31492	2.73342	0.901235		3.4411	4.33039	2.64646	0.920546		3.0753	4.41346	2.3785	0.96972		3.32193	4.44067	2.57386	0.959824		0.879925	9.48195	0.787125	0.297877		1.3708	8.93845	1.21744	0.603757		1.29222	7.79976	1.12655	0.478018		1.73383	7.33639	1.4975	0.863292
	78.9	3.5598	4.31711	2.73522	0.901829		3.43916	4.32795	2.64452	0.919871		3.0757	4.41404	2.3789	0.969883		3.32193	4.44067	2.57386	0.959824		0.8724	9.40086	0.7796	0.295029		1.36508	8.90115	1.21172	0.60092		1.29018	7.78738	1.1245	0.477148		1.73193	7.32835	1.4956	0.862196
	79.2	3.56025	4.31765	2.73567	0.901977		3.44014	4.32918	2.6455	0.920212		3.0759	4.41432	2.3791	0.969965		3.32083	4.4392	2.57276	0.959414		0.863275	9.30253	0.770475	0.291576		1.36018	8.8692	1.20682	0.59849		1.2896	7.78391	1.12393	0.476904		1.72677	7.30649	1.49043	0.859218
	79.5	3.56025	4.31765	2.73567	0.901977		3.44174	4.33119	2.6471	0.920769		3.0749	4.41289	2.3781	0.969557		3.32277	4.44179	2.5747	0.960134		0.85165	9.17726	0.75885	0.287177		1.35352	8.82577	1.20016	0.595188		1.2857	7.76037	1.12003	0.475249		1.72457	7.29718	1.48823	0.857949
	79.8	3.5637	4.32184	2.73912	0.903115		3.43996	4.32895	2.64532	0.92015		3.0761	4.41461	2.3793	0.970046		3.3222	4.44103	2.57413	0.959923		0.845125	9.10695	0.752325	0.284707		1.34312	8.75796	1.18976	0.59003		1.28265	7.74196	1.11698	0.473955		1.72323	7.29154	1.4869	0.857181
	80.1	3.5639	4.32208	2.73932	0.903181		3.4416	4.33102	2.64696	0.92072		3.0747	4.4126	2.3779	0.969475		3.32493	4.44468	2.57686	0.960942		0.8356	9.00431	0.7428	0.281103		1.33806	8.72496	1.1847	0.587521		1.27862	7.71767	1.11295	0.472247		1.7235	7.29267	1.48717	0.857334
	80.4	3.56595	4.32457	2.74137	0.903857		3.4437	4.33366	2.64906	0.921451		3.0767	4.41547	2.3799	0.970291		3.3249	4.44464	2.57683	0.96093		0.82705	8.91218	0.73425	0.277867		1.333	8.69197	1.17964	0.585011		1.2727	7.68191	1.10702	0.469733		1.71943	7.27546	1.4831	0.85499
	80.7	3.56858	4.32775	2.74399	0.904722		3.4429	4.33265	2.64826	0.921172		3.07693	4.41579	2.38013	0.970382		3.32547	4.4454	2.5774	0.961141		0.81685	8.80226	0.72405	0.274007		1.32618	8.6475	1.17282	0.581629		1.26943	7.66214	1.10375	0.468344		1.7151	7.25712	1.47877	0.852492
	81	3.5692	4.32851	2.74462	0.904928		3.44504	4.33535	2.6504	0.921917		3.0753	4.41346	2.3785	0.96972		3.32547	4.4454	2.5774	0.961141		0.806875	8.69477	0.714075	0.270232		1.32194	8.61985	1.16858	0.579526		1.26475	7.63392	1.09908	0.46636		1.7124	7.2457	1.47607	0.850935
	81.3	3.5696	4.32899	2.74502	0.90506		3.44648	4.33716	2.65184	0.922418		3.07635	4.41497	2.37955	0.970148		3.3244	4.44397	2.57633	0.960744		0.7967	8.58513	0.7039	0.266382		1.31396	8.56781	1.1606	0.575569		1.26315	7.62426	1.09747	0.465681		1.71023	7.23653	1.4739	0.849686
	81.6	3.57143	4.3312	2.74684	0.905662		3.44662	4.33734	2.65198	0.922466		3.07733	4.41637	2.38053	0.970546		3.3241	4.44357	2.57603	0.960632		0.78935	8.50593	0.69655	0.2636		1.30664	8.52008	1.15328	0.571939		1.2611	7.61189	1.09543	0.464811		1.70777	7.22609	1.47143	0.848264
	81.9	3.57203	4.33193	2.74744	0.90586		3.44824	4.33937	2.6536	0.92303		3.07713	4.41608	2.38033	0.970464		3.32493	4.44468	2.57686	0.960942		0.782875	8.43615	0.690075	0.26115		1.3011	8.48396	1.14774	0.569191		1.2603	7.60706	1.09462	0.464472		1.7045	7.21227	1.46817	0.846381
	82.2	3.57205	4.33196	2.74747	0.905868		3.44878	4.34005	2.65414	0.923218		3.07958	4.4196	2.38278	0.971463		3.32467	4.44433	2.5766	0.960843		0.774125	8.34186	0.681325	0.257838		1.2936	8.43505	1.14024	0.565472		1.25925	7.60072	1.09357	0.464026		1.69937	7.19055	1.46303	0.843422
	82.5	3.57203	4.33193	2.74744	0.90586		3.4481	4.3392	2.65346	0.922981		3.0779	4.41719	2.3811	0.97078		3.32543	4.44535	2.57736	0.961129		0.76455	8.23869	0.67175	0.254215		1.28676	8.39045	1.1334	0.56208		1.255	7.57507	1.08933	0.462223		1.69557	7.17447	1.45923	0.841231
	82.8	3.5757	4.33639	2.75112	0.907071		3.4499	4.34146	2.65526	0.923607		3.07815	4.41755	2.38135	0.970882		3.3249	4.44464	2.57683	0.96093		0.755575	8.14197	0.662775	0.250818		1.28204	8.35968	1.12868	0.559739		1.25457	7.57251	1.0889	0.462042		1.695	7.17207	1.45867	0.840905
	83.1	3.57633	4.33715	2.75175	0.907277		3.44878	4.34005	2.65414	0.923218		3.08	4.42021	2.3832	0.971636		3.32653	4.44682	2.57846	0.961539		0.748075	8.06115	0.655275	0.24798		1.27568	8.31821	1.12232	0.556585		1.25375	7.56753	1.08807	0.461692		1.6915	7.15726	1.45517	0.838887
	83.4	3.57775	4.33888	2.75317	0.907747		3.4507	4.34247	2.65606	0.923886		3.0796	4.41963	2.3828	0.971473		3.3282	4.44905	2.58013	0.962161		0.7393	7.96659	0.6465	0.244659		1.26982	8.27999	1.11646	0.553679		1.24968	7.54293	1.084	0.459963		1.68903	7.14683	1.4527	0.837465
	83.7	3.57855	4.33985	2.75397	0.908011		3.45088	4.3427	2.65624	0.923948		3.08117	4.42189	2.38437	0.972115		3.32657	4.44687	2.5785	0.961552		0.7312	7.87931	0.6384	0.241594		1.26382	8.24087	1.11046	0.550703		1.2497	7.54308	1.08403	0.459974		1.6866	7.13653	1.45027	0.836062
	84	3.58102	4.34285	2.75644	0.908827		3.45088	4.3427	2.65624	0.923948		3.0804	4.42078	2.3836	0.971799		3.32657	4.44687	2.5785	0.961552		0.723825	7.79984	0.631025	0.238803		1.25664	8.19405	1.10328	0.547142		1.2501	7.5455	1.08442	0.460144		1.68283	7.12059	1.4465	0.833891
	84.3	3.58243	4.34455	2.75785	0.909289		3.45608	4.34924	2.66144	0.925757		3.07897	4.41874	2.38218	0.971218		3.3287	4.44972	2.58063	0.962347		0.713475	7.68831	0.620675	0.234886		1.25358	8.1741	1.10022	0.545625		1.24422	7.51003	1.07855	0.457651		1.6804	7.1103	1.44407	0.832488
	84.6	3.58385	4.34627	2.75927	0.909758		3.45236	4.34456	2.65772	0.924463		3.0818	4.42279	2.385	0.97237		3.32873	4.44976	2.58066	0.96236		0.705975	7.60749	0.613175	0.232048		1.24298	8.10498	1.08962	0.540368		1.24378	7.50732	1.0781	0.45746		1.67493	7.08717	1.4386	0.829336
	84.9	3.58588	4.34873	2.7613	0.910426		3.45446	4.3472	2.65982	0.925193		3.081	4.42164	2.3842	0.972044		3.3325	4.4548	2.58443	0.963764		0.696575	7.5062	0.603775	0.228491		1.23664	8.06364	1.08328	0.537224		1.24115	7.49147	1.07547	0.456346		1.67413	7.08378	1.4378	0.828875
	85.2	3.58565	4.34846	2.76107	0.910352		3.45624	4.34944	2.6616	0.925813		3.07998	4.42017	2.38318	0.971626		3.33113	4.45297	2.58306	0.963255		0.68905	7.42511	0.59625	0.225643		1.2311	8.02752	1.07774	0.534477		1.2383	7.47427	1.07262	0.455137		1.6706	7.06883	1.43427	0.826838
	85.5	3.58787	4.35115	2.76329	0.911086		3.45542	4.34841	2.66078	0.925527		3.08283	4.42426	2.38603	0.972788		3.33087	4.45261	2.5828	0.963155		0.683325	7.36342	0.590525	0.223476		1.2236	7.97861	1.07024	0.530757		1.23667	7.46446	1.071	0.454447		1.6668	7.05275	1.43047	0.824648
	85.8	3.59017	4.35394	2.76559	0.911844		3.45888	4.35276	2.66424	0.926731		3.08323	4.42483	2.38643	0.972951		3.33007	4.45154	2.582	0.962857		0.675825	7.2826	0.583025	0.220638		1.2184	7.94471	1.06504	0.528178		1.2328	7.44107	1.06713	0.452803		1.6619	7.03202	1.42557	0.821823
	86.1	3.59013	4.35388	2.76554	0.911827		3.4582	4.35191	2.66356	0.926494		3.08283	4.42426	2.38603	0.972788		3.32953	4.45083	2.58146	0.962658		0.667075	7.18831	0.574275	0.217327		1.21058	7.89371	1.05722	0.5243		1.23158	7.43368	1.0659	0.452283		1.65677	7.0103	1.42043	0.818863
	86.4	3.59647	4.36158	2.7719	0.913921		3.46066	4.355	2.66602	0.92735		3.08363	4.42541	2.38682	0.973114		3.3306	4.45226	2.58253	0.963056		0.664025	7.15544	0.571225	0.216172		1.2047	7.85537	1.05134	0.521384		1.23178	7.43489	1.0661	0.452368		1.65543	7.00465	1.4191	0.818095
	86.7	3.59298	4.35734	2.76839	0.912767		3.45902	4.35294	2.66438	0.92678		3.08343	4.42512	2.38662	0.973033		3.3317	4.45373	2.58363	0.963466		0.650375	7.00835	0.557575	0.211007		1.19544	7.79499	1.04208	0.516792		1.2312	7.43142	1.06553	0.452124		1.6543	6.99986	1.41797	0.817441
	87	3.5938	4.35834	2.76922	0.913039		3.4618	4.35644	2.66716	0.927747		3.08137	4.42218	2.38457	0.972197		3.33117	4.45301	2.5831	0.963267		0.6447	6.9472	0.5519	0.208859		1.18924	7.75456	1.03588	0.513717		1.22545	7.39671	1.05977	0.449684		1.6519	6.9897	1.41557	0.816058
	87.3	3.59503	4.35983	2.77045	0.913443		3.45836	4.35211	2.66372	0.92655		3.08465	4.42688	2.38785	0.973532		3.33227	4.45449	2.5842	0.963677		0.6349	6.84159	0.5421	0.205151		1.18048	7.69744	1.02712	0.509373		1.22428	7.38962	1.0586	0.449186		1.64807	6.97348	1.41173	0.813848
	87.6	3.59868	4.36425	2.77409	0.914646		3.4624	4.35719	2.66776	0.927955		3.08323	4.42483	2.38643	0.972951		3.33227	4.45449	2.5842	0.963677		0.630875	6.79822	0.538075	0.203627		1.17412	7.65597	1.02076	0.506219		1.21895	7.35748	1.05327	0.446926		1.6432	6.95289	1.40687	0.811042
	87.9	3.5991	4.36477	2.77452	0.914786		3.46244	4.35724	2.6678	0.927969		3.08263	4.42397	2.38583	0.972706		3.3317	4.45373	2.58363	0.963466		0.6221	6.70366	0.5293	0.200307		1.16776	7.6145	1.0144	0.503065		1.21368	7.32564	1.048	0.444688		1.63917	6.93583	1.40283	0.808717
	88.2	3.60035	4.36628	2.77577	0.915199		3.46212	4.35684	2.66748	0.927858		3.08383	4.4257	2.38702	0.973196		3.33087	4.45261	2.5828	0.963155		0.611725	6.59186	0.518925	0.19638		1.16172	7.57512	1.00836	0.500069		1.21205	7.31583	1.04638	0.443998		1.63833	6.9323	1.402	0.808237
	88.5	3.60175	4.36798	2.77717	0.91566		3.46438	4.35968	2.66974	0.928644		3.08422	4.42627	2.38742	0.973359		3.3298	4.45119	2.58173	0.962757		0.60295	6.49731	0.51015	0.193059		1.158	7.55086	1.00464	0.498225		1.20755	7.28867	1.04188	0.442089		1.63397	6.91382	1.39763	0.80572
	88.8	3.60358	4.37019	2.779	0.916262		3.46374	4.35888	2.6691	0.928421		3.08588	4.42864	2.38908	0.974031		3.33307	4.45555	2.585	0.963975		0.59505	6.41218	0.50225	0.19007		1.14872	7.49035	0.99536	0.493622		1.2088	7.29621	1.04313	0.442619		1.63423	6.91495	1.3979	0.805873
	89.1	3.60315	4.36968	2.77857	0.916122		3.46552	4.36112	2.67088	0.929041		3.08588	4.42864	2.38908	0.974031		3.3336	4.45627	2.58553	0.964174		0.585475	6.309	0.492675	0.186446		1.14302	7.45318	0.98966	0.490796		1.2088	7.29621	1.04313	0.442619		1.63207	6.90578	1.39573	0.804624
	89.4	3.60683	4.37414	2.78225	0.917334		3.46324	4.35825	2.6686	0.928247		3.08485	4.42717	2.38805	0.973614		3.3347	4.45774	2.58663	0.964585		0.580575	6.2562	0.487775	0.184592		1.13636	7.40975	0.983	0.487493		1.2033	7.26301	1.03763	0.440285		1.6272	6.88519	1.39087	0.801819
	89.7	3.60542	4.37244	2.78084	0.916872		3.46666	4.36255	2.67202	0.929437		3.08525	4.42774	2.38845	0.973777		3.33143	4.45337	2.58336	0.963366		0.57325	6.17726	0.48045	0.18182		1.13244	7.38419	0.97908	0.485549		1.20148	7.252	1.0358	0.439511		1.62013	6.85529	1.3838	0.797745
	90	3.60885	4.37659	2.78427	0.918001		3.46746	4.36356	2.67282	0.929715		3.0877	4.43126	2.3909	0.974775		3.33333	4.45591	2.58526	0.964075		0.56855	6.12662	0.47575	0.180041		1.12612	7.34298	0.97276	0.482415		1.20085	7.24823	1.03517	0.439246		1.61633	6.83921	1.38	0.795554
	90.3	3.60867	4.37638	2.7841	0.917943		3.47644	4.37486	2.6818	0.932839		3.08708	4.43036	2.39027	0.974521		3.33417	4.45702	2.5861	0.964386		0.562675	6.06331	0.469875	0.177818		1.12298	7.32251	0.96962	0.480857		1.19515	7.21382	1.02947	0.436827		1.61253	6.82313	1.3762	0.793363
	90.6	3.61028	4.37832	2.7857	0.918471		3.46714	4.36316	2.6725	0.929604		3.08628	4.42921	2.38948	0.974194		3.3355	4.45881	2.58743	0.964883		0.55455	5.97575	0.46175	0.174743		1.11048	7.241	0.95712	0.474658		1.19128	7.19043	1.0256	0.435183		1.609	6.80818	1.37267	0.791327
	90.9	3.61253	4.38105	2.78795	0.919213		3.46994	4.36668	2.6753	0.930578		3.08548	4.42806	2.38868	0.973868		3.33443	4.45738	2.58636	0.964485		0.5478	5.90302	0.455	0.172189		1.1064	7.2144	0.95304	0.472635		1.18722	7.16599	1.02155	0.433464		1.60443	6.78886	1.3681	0.788694
	91.2	3.61415	4.38302	2.78957	0.919749		3.47092	4.36792	2.67628	0.930919		3.08628	4.42921	2.38948	0.974194		3.3347	4.45774	2.58663	0.964585		0.54215	5.84213	0.44935	0.170051		1.10004	7.17293	0.94668	0.469481		1.1852	7.15376	1.01953	0.432605		1.60033	6.77151	1.364	0.78633
	91.5	3.61497	4.38402	2.7904	0.920021		3.46894	4.36542	2.6743	0.93023		3.08708	4.43036	2.39027	0.974521		3.3336	4.45627	2.58553	0.964174		0.533575	5.74973	0.440775	0.166805		1.09468	7.13798	0.94132	0.466823		1.1813	7.13022	1.01562	0.43095		1.59357	6.74288	1.35723	0.782429
	91.8	3.6162	4.38551	2.79162	0.920425		3.47234	4.3697	2.6777	0.931413		3.0873	4.43068	2.3905	0.974612		3.3355	4.45881	2.58743	0.964883		0.52765	5.68588	0.43485	0.164563		1.09156	7.11763	0.9382	0.465275		1.17928	7.118	1.0136	0.430091		1.59003	6.72793	1.3537	0.780392
	92.1	3.61805	4.38775	2.79347	0.921034		3.47172	4.36892	2.67708	0.931197		3.08732	4.43072	2.39052	0.974623		3.33633	4.45992	2.58826	0.965194		0.524625	5.65329	0.431825	0.163418		1.08376	7.06677	0.9304	0.461407		1.17685	7.10337	1.01117	0.429062		1.58757	6.71749	1.35123	0.77897
	92.4	3.61865	4.38848	2.79407	0.921232		3.47402	4.37182	2.67938	0.931997		3.0883	4.43212	2.3915	0.97502		3.33577	4.45916	2.5877	0.964982		0.519125	5.59402	0.426325	0.161337		1.07626	7.01787	0.9229	0.457688		1.1728	7.07892	1.00713	0.427344		1.5854	6.70832	1.34907	0.777721
	92.7	3.61865	4.38848	2.79407	0.921232		3.47514	4.37323	2.6805	0.932387		3.0877	4.43126	2.3909	0.974775		3.3385	4.46282	2.59043	0.966002		0.5112	5.50862	0.4184	0.158338		1.06992	6.97653	0.91656	0.454544		1.1689	7.05538	1.00323	0.425689		1.58213	6.6945	1.3458	0.775838
	93	3.62127	4.39166	2.7967	0.922098		3.47544	4.3736	2.6808	0.932491		3.0875	4.43097	2.3907	0.974694		3.33687	4.46063	2.5888	0.965393		0.507925	5.47333	0.415125	0.157099		1.05918	6.90649	0.90582	0.449217		1.16685	7.04301	1.00117	0.424819		1.57723	6.67377	1.3409	0.773013
	93.3	3.62252	4.39318	2.79794	0.92251		3.47464	4.3726	2.68	0.932213		3.08975	4.4342	2.39295	0.975611		3.3385	4.46282	2.59043	0.966002		0.50285	5.41864	0.41005	0.155178		1.05284	6.86515	0.89948	0.446073		1.16728	7.04557	1.0016	0.424999		1.57483	6.66361	1.3385	0.77163
	93.6	3.62495	4.39612	2.80037	0.923309		3.48294	4.38304	2.6883	0.9351		3.0885	4.43241	2.3917	0.975102		3.33767	4.4617	2.5896	0.965691		0.495525	5.33971	0.402725	0.152406		1.05006	6.84703	0.8967	0.444695		1.16627	7.03954	1.0006	0.424575		1.56993	6.64288	1.3336	0.768805
	93.9	3.62538	4.39663	2.80079	0.92345		3.47758	4.3763	2.68294	0.933235		3.08893	4.43302	2.39213	0.975275		3.3374	4.46135	2.58933	0.965591		0.488375	5.26266	0.395575	0.1497		1.04094	6.78756	0.88758	0.440172		1.16952	7.05915	1.00385	0.425954		1.56693	6.63018	1.3306	0.767076
	94.2	3.62617	4.3976	2.80159	0.923713		3.47724	4.37587	2.6826	0.933117		3.08953	4.43388	2.39272	0.97552		3.3374	4.46135	2.58933	0.965591		0.48005	5.17295	0.38725	0.14655		1.03376	6.74074	0.8804	0.436611		1.1697	7.06021	1.00402	0.426028		1.56507	6.62228	1.32873	0.765999
	94.5	3.6268	4.39836	2.80222	0.923919		3.47954	4.37876	2.6849	0.933917		3.08915	4.43334	2.39235	0.975367		3.33847	4.46277	2.5904	0.965989		0.469475	5.059	0.376675	0.142548		1.02874	6.70801	0.87538	0.434122		1.1681	7.05055	1.00242	0.425349		1.5645	6.61989	1.32817	0.765673
	94.8	3.62962	4.40179	2.80504	0.924851		3.48066	4.38017	2.68602	0.934307		3.08955	4.43391	2.39275	0.97553		3.33877	4.46317	2.5907	0.966101		0.46295	4.98869	0.37015	0.140078		1.01962	6.64854	0.86626	0.429599		1.16625	7.03938	1.00057	0.424564		1.56017	6.60155	1.32383	0.763175
	95.1	3.63045	4.40279	2.80587	0.925123		3.48116	4.3808	2.68652	0.934481		3.08997	4.43452	2.39317	0.975703		3.3393	4.46389	2.59123	0.9663		0.45725	4.92726	0.36445	0.137921		1.01376	6.61033	0.8604	0.426693		1.16178	7.01237	0.9961	0.422665		1.55853	6.59464	1.3222	0.762233
	95.4	3.63327	4.40621	2.8087	0.926054		3.48374	4.38405	2.6891	0.935378		3.09037	4.4351	2.39357	0.975866		3.3385	4.46282	2.59043	0.966002		0.453625	4.8882	0.360825	0.136549		1.00788	6.57199	0.85452	0.423777		1.15932	6.99759	0.99365	0.421626		1.5553	6.58096	1.31897	0.760369
	95.7	3.63373	4.40676	2.80915	0.926203		3.48162	4.38138	2.68698	0.934641		3.09158	4.43682	2.39478	0.976355		3.33767	4.4617	2.5896	0.965691		0.4471	4.81789	0.3543	0.13408		1.00024	6.52217	0.84688	0.419988		1.15793	6.98914	0.99225	0.421032		1.552	6.567	1.31567	0.758467
	96	3.63472	4.40797	2.81014	0.926532		3.48378	4.3841	2.68914	0.935392		3.09178	4.43711	2.39498	0.976437		3.3412	4.46643	2.59313	0.967009		0.4414	4.75647	0.3486	0.131923		0.99292	6.47444	0.83956	0.416358		1.15508	6.97193	0.9894	0.419823		1.5493	6.55557	1.31297	0.75691
	96.3	3.63635	4.40994	2.81177	0.927068		3.4841	4.3845	2.68946	0.935503		3.09057	4.43538	2.39378	0.975948		3.3412	4.46643	2.59313	0.967009		0.4361	4.69935	0.3433	0.129917		0.98476	6.42123	0.8314	0.412311		1.1512	6.94854	0.985525	0.418178		1.5458	6.54076	1.30947	0.754892
	96.6	3.63695	4.41067	2.81237	0.927266		3.48442	4.3849	2.68978	0.935615		3.09178	4.43711	2.39498	0.976437		3.34227	4.46785	2.5942	0.967406		0.4314	4.64871	0.3386	0.128139		0.98054	6.39371	0.82718	0.410218		1.14938	6.93753	0.9837	0.417404		1.54227	6.52581	1.30593	0.752856
	96.9	3.63837	4.4124	2.81379	0.927736		3.48622	4.38717	2.69158	0.936241		3.09117	4.43624	2.39438	0.976192		3.3412	4.46643	2.59313	0.967009		0.425325	4.58324	0.332525	0.12584		0.97518	6.35876	0.82182	0.40756		1.14633	6.91912	0.98065	0.41611		1.5363	6.50056	1.29997	0.749416
	97.2	3.64023	4.41464	2.81564	0.928346		3.48618	4.38712	2.69154	0.936227		3.09198	4.43739	2.39518	0.976518		3.34147	4.46678	2.5934	0.967108		0.42145	4.54149	0.32865	0.124373		0.97014	6.3259	0.81678	0.40506		1.1451	6.91172	0.979425	0.41559		1.53303	6.48674	1.2967	0.747533
	97.5	3.63978	4.4141	2.8152	0.928197		3.48686	4.38797	2.69222	0.936463		3.0928	4.43858	2.396	0.976855		3.34287	4.46865	2.5948	0.96763		0.416375	4.4868	0.323575	0.122453		0.96572	6.29708	0.81236	0.402868		1.14285	6.89814	0.977175	0.414635		1.53033	6.47532	1.294	0.745976
	97.8	3.64245	4.41734	2.81787	0.929079		3.489	4.39067	2.69436	0.937208		3.09138	4.43653	2.39458	0.976274		3.34283	4.46861	2.59476	0.967618		0.41065	4.42511	0.31785	0.120286		0.96036	6.26213	0.807	0.40021		1.1402	6.88215	0.974525	0.413511		1.52707	6.4615	1.29073	0.744093
	98.1	3.6449	4.42031	2.82032	0.929887		3.48868	4.39026	2.69404	0.937097		3.09422	4.44062	2.39743	0.977436		3.34177	4.46718	2.5937	0.96722		0.405575	4.37042	0.312775	0.118366		0.95302	6.21427	0.79966	0.39657		1.13817	6.86993	0.9725	0.412652		1.52277	6.4433	1.28643	0.741614
	98.4	3.6453	4.4208	2.82072	0.930019		3.49092	4.39308	2.69628	0.937876		3.09302	4.4389	2.39622	0.976946		3.3439	4.47004	2.59583	0.968015		0.399875	4.309	0.307075	0.116208		0.94782	6.18036	0.79446	0.393991		1.13655	6.86012	0.970875	0.411962		1.51837	6.42468	1.28203	0.739077
	98.7	3.64672	4.42252	2.82214	0.930489		3.4906	4.39268	2.69596	0.937764		3.0938	4.44001	2.397	0.977262		3.34337	4.46932	2.5953	0.967816		0.397225	4.28044	0.304425	0.115206		0.94016	6.13041	0.7868	0.390193		1.13125	6.82813	0.965575	0.409713		1.51187	6.39718	1.27553	0.73533
	99	3.64792	4.42398	2.82335	0.930885		3.48948	4.39127	2.69484	0.937375		3.09485	4.44152	2.39805	0.977691		3.34363	4.46968	2.59556	0.967916		0.39355	4.24084	0.30075	0.113815		0.93398	6.09011	0.78062	0.387128		1.13085	6.82571	0.965175	0.409543		1.51217	6.39845	1.27583	0.735503
	99.3	3.6504	4.42698	2.82582	0.931701		3.49352	4.39636	2.69888	0.93878		3.0928	4.43858	2.396	0.976855		3.3423	4.4679	2.59423	0.967419		0.38765	4.17726	0.29485	0.111582		0.93008	6.06468	0.77672	0.385194		1.1268	6.80127	0.961125	0.407825		1.50887	6.38449	1.27253	0.733601
	99.6	3.6512	4.42795	2.82662	0.931964		3.49206	4.39452	2.69742	0.938272		3.09422	4.44062	2.39743	0.977436		3.3423	4.4679	2.59423	0.967419		0.38015	4.09644	0.28735	0.108744		0.92504	6.03182	0.77168	0.382694		1.12597	6.79629	0.9603	0.407475		1.50427	6.36502	1.26793	0.730949
	99.9	3.65322	4.43041	2.82864	0.932632		3.49384	4.39676	2.6992	0.938891		3.09687	4.44442	2.40008	0.978516		3.3431	4.46897	2.59503	0.967717		0.37505	4.04149	0.28225	0.106814		0.9203	6.00091	0.76694	0.380344		1.127	6.80247	0.961325	0.40791		1.49993	6.34669	1.2636	0.728451
	100.2	3.6526	4.42965	2.82802	0.932426		3.49468	4.39782	2.70004	0.939184		3.09583	4.44292	2.39902	0.978088		3.34363	4.46968	2.59556	0.967916		0.36935	3.98006	0.27655	0.104657		0.91412	5.96062	0.76076	0.377279		1.12515	6.79131	0.959475	0.407125		1.49507	6.32609	1.25873	0.725645
	100.5	3.65263	4.42968	2.82804	0.932434		3.49662	4.40026	2.70198	0.939858		3.09525	4.44209	2.39845	0.977854		3.34227	4.46785	2.5942	0.967406		0.364475	3.92753	0.271675	0.102812		0.90826	5.9224	0.7549	0.374373		1.12433	6.78633	0.95865	0.406775		1.48693	6.29168	1.2506	0.720957
	100.8	3.6549	4.43244	2.83032	0.933184		3.49614	4.39965	2.7015	0.939691		3.09565	4.44267	2.39885	0.978017		3.3439	4.47004	2.59583	0.968015		0.3604	3.88362	0.2676	0.10127		0.90142	5.8778	0.74806	0.370981		1.12272	6.77667	0.95705	0.406096		1.4839	6.27884	1.24757	0.719208
	101.1	3.6563	4.43414	2.83172	0.933646		3.49844	4.40255	2.7038	0.940491		3.0936	4.43972	2.3968	0.977181		3.34607	4.47293	2.598	0.968823		0.3543	3.81789	0.2615	0.0989612		0.89558	5.83972	0.74222	0.368084		1.11763	6.74589	0.95195	0.403932		1.48067	6.26516	1.24433	0.717344
	101.4	3.6565	4.43438	2.83192	0.933712		3.49678	4.40046	2.70214	0.939914		3.09585	4.44295	2.39905	0.978098		3.34823	4.47583	2.60016	0.969631		0.3502	3.77371	0.2574	0.0974096		0.88938	5.7993	0.73602	0.36501		1.117	6.74212	0.951325	0.403667		1.48093	6.26629	1.2446	0.717498
	101.7	3.65647	4.43435	2.83189	0.933704		3.49824	4.4023	2.7036	0.940422		3.09585	4.44295	2.39905	0.978098		3.34663	4.47369	2.59856	0.969035		0.343725	3.70393	0.250925	0.0949592		0.884	5.76421	0.73064	0.362342		1.11577	6.73472	0.9501	0.403147		1.47497	6.24104	1.23863	0.714058
	102	3.65915	4.43759	2.83457	0.934586		3.49842	4.40252	2.70378	0.940484		3.09585	4.44295	2.39905	0.978098		3.34743	4.47476	2.59936	0.969333		0.3439	3.70582	0.2511	0.0950254		0.87732	5.72066	0.72396	0.359029		1.11153	6.70907	0.94585	0.401343		1.4717	6.22722	1.23537	0.712175
	102.3	3.66078	4.43956	2.8362	0.935121		3.50006	4.40459	2.70542	0.941055		3.09848	4.44672	2.40168	0.979168		3.3477	4.47512	2.59963	0.969432		0.33985	3.66218	0.24705	0.0934928		0.87116	5.68049	0.7178	0.355974		1.1109	6.7053	0.945225	0.401078		1.46873	6.21467	1.2324	0.710464
	102.6	3.66217	4.44126	2.83759	0.935583		3.5004	4.40501	2.70576	0.941173		3.09785	4.44582	2.40105	0.978914		3.34663	4.47369	2.59856	0.969035		0.331475	3.57193	0.238675	0.0903234		0.86774	5.65819	0.71438	0.354278		1.1046	6.66727	0.938925	0.398405		1.46437	6.19619	1.22803	0.707947
	102.9	3.66317	4.44247	2.8386	0.935913		3.50152	4.40642	2.70688	0.941563		3.09745	4.44525	2.40065	0.978751		3.34557	4.47226	2.5975	0.968637		0.325775	3.51051	0.232975	0.0881663		0.8638	5.6325	0.71044	0.352324		1.10155	6.64886	0.935875	0.397111		1.46057	6.18011	1.22423	0.705756
	103.2	3.66443	4.44399	2.83984	0.936325		3.50264	4.40783	2.708	0.941952		3.09808	4.44615	2.40128	0.979005		3.34717	4.4744	2.5991	0.969234		0.321925	3.46902	0.229125	0.0867093		0.85976	5.60616	0.7064	0.35032		1.09767	6.62547	0.932	0.395467		1.45897	6.17334	1.22263	0.704834
	103.5	3.66565	4.44548	2.84107	0.936729		3.50232	4.40743	2.70768	0.941841		3.0979	4.4459	2.4011	0.978934		3.34743	4.47476	2.59936	0.969333		0.31705	3.41649	0.22425	0.0848644		0.85178	5.55412	0.69842	0.346363		1.09462	6.60706	0.92895	0.394172		1.45433	6.15374	1.218	0.702163
	103.8	3.66688	4.44696	2.8423	0.937133		3.50424	4.40985	2.7096	0.942509		3.09788	4.44586	2.40108	0.978924		3.34717	4.4744	2.5991	0.969234		0.31255	3.368	0.21975	0.0831615		0.84576	5.51487	0.6924	0.343377		1.09322	6.59861	0.92755	0.393578		1.45053	6.13766	1.2142	0.699972
	104.1	3.6687	4.44917	2.84412	0.937734		3.50378	4.40927	2.70914	0.942349		3.0993	4.4479	2.4025	0.979505		3.3485	4.47619	2.60043	0.969731		0.309725	3.33755	0.216925	0.0820924		0.8394	5.4734	0.68604	0.340223		1.09038	6.58141	0.9247	0.392369		1.44943	6.133	1.2131	0.699338
	104.4	3.6693	4.4499	2.84472	0.937932		3.50752	4.41397	2.71288	0.94365		3.0989	4.44733	2.4021	0.979342		3.34933	4.4773	2.60126	0.970042		0.30545	3.29149	0.21265	0.0804746		0.83322	5.4331	0.67986	0.337159		1.0871	6.56164	0.921425	0.390979		1.44783	6.12623	1.2115	0.698416
	104.7	3.67195	4.45312	2.84737	0.938806		3.50672	4.41297	2.71208	0.943372		3.09952	4.44823	2.40273	0.979597		3.34907	4.47694	2.601	0.969942		0.302225	3.25673	0.209425	0.0792541		0.82834	5.40128	0.67498	0.334738		1.08363	6.54067	0.91795	0.389505		1.4435	6.1079	1.20717	0.695918
	105	3.6732	4.45463	2.84862	0.939218		3.50738	4.4138	2.71274	0.943601		3.09972	4.44851	2.40293	0.979678		3.34933	4.4773	2.60126	0.970042		0.29835	3.21498	0.20555	0.0777877		0.82262	5.36398	0.66926	0.331902		1.08222	6.53222	0.91655	0.388911		1.4381	6.08505	1.20177	0.692805
	105.3	3.6736	4.45512	2.84902	0.93935		3.50948	4.41644	2.71484	0.944332		3.0987	4.44704	2.4019	0.97926		3.35017	4.47841	2.6021	0.970352		0.292	3.14655	0.1992	0.0753846		0.8197	5.34494	0.66634	0.330454		1.07977	6.51743	0.9141	0.387871		1.43563	6.07461	1.1993	0.691383
	105.6	3.67623	4.4583	2.85164	0.940215		3.5077	4.4142	2.71306	0.943712		3.1003	4.44934	2.4035	0.979913		3.3461	4.47298	2.59803	0.968836		0.28735	3.09644	0.19455	0.0736249		0.81206	5.29512	0.6587	0.326665		1.07997	6.51864	0.9143	0.387956		1.42367	6.02398	1.18733	0.684484
	105.9	3.6752	4.45706	2.85062	0.939877		3.51096	4.4183	2.71632	0.944846		3.09972	4.44851	2.40293	0.979678		3.3496	4.47766	2.60153	0.970141		0.28205	3.03933	0.18925	0.0716191		0.80912	5.27595	0.65576	0.325207		1.07713	6.50143	0.91145	0.386747		1.4245	6.0275	1.18817	0.684964
	106.2	3.67745	4.45979	2.85287	0.940619		3.51062	4.41787	2.71598	0.944728		3.0995	4.44819	2.4027	0.979586		3.34963	4.4777	2.60156	0.970153		0.2796	3.01293	0.1868	0.070692		0.80276	5.23448	0.6494	0.322053		1.0755	6.49163	0.909825	0.386057		1.421	6.01269	1.18467	0.682947
	106.5	3.67765	4.46003	2.85307	0.940685		3.51452	4.42278	2.71988	0.946085		3.10012	4.44909	2.40333	0.979841		3.34933	4.4773	2.60126	0.970042		0.2735	2.9472	0.1807	0.0683835		0.79772	5.20162	0.64436	0.319553		1.07407	6.48302	0.9084	0.385453		1.41693	5.99549	1.1806	0.680602
	106.8	3.6799	4.46276	2.85532	0.941427		3.51322	4.42115	2.71858	0.945633		3.10012	4.44909	2.40333	0.979841		3.35127	4.47988	2.6032	0.970762		0.2678	2.88578	0.175	0.0662264		0.7909	5.15715	0.63754	0.316171		1.07143	6.46703	0.90575	0.384328		1.4101	5.96657	1.17377	0.676663
	107.1	3.68193	4.46521	2.85735	0.942095		3.5142	4.42238	2.71956	0.945973		3.0995	4.44819	2.4027	0.979586		3.35017	4.47841	2.6021	0.970352		0.26355	2.83998	0.17075	0.0646181		0.78584	5.12415	0.63248	0.313662		1.0698	6.45722	0.904125	0.383639		1.40303	5.93667	1.1667	0.672589
	107.4	3.68173	4.46497	2.85715	0.942029		3.51518	4.42361	2.72054	0.946314		3.10115	4.45056	2.40435	0.980259		3.35123	4.47984	2.60316	0.97075		0.2605	2.80711	0.1677	0.0634638		0.7808	5.09129	0.62744	0.311162		1.06838	6.44862	0.9027	0.383034		1.40007	5.92412	1.16373	0.670879
	107.7	3.6852	4.46918	2.86062	0.943175		3.5155	4.42402	2.72086	0.946426		3.10133	4.45081	2.40453	0.98033		3.35317	4.48242	2.6051	0.971471		0.259675	2.79822	0.166875	0.0631516		0.77444	5.04982	0.62108	0.308008		1.06575	6.43278	0.900075	0.38192		1.39953	5.92186	1.1632	0.670571
	108	3.68622	4.47043	2.86165	0.943512		3.51612	4.4248	2.72148	0.946641		3.10115	4.45056	2.40435	0.980259		3.35123	4.47984	2.60316	0.97075		0.255	2.74784	0.1622	0.0613824		0.7712	5.02869	0.61784	0.306401		1.06595	6.43398	0.900275	0.382005		1.39277	5.89323	1.15643	0.666671
	108.3	3.68637	4.47061	2.86179	0.943562		3.51744	4.42646	2.7228	0.9471		3.10235	4.45228	2.40555	0.980748		3.3515	4.4802	2.60343	0.970849		0.247875	2.67107	0.155075	0.0586861		0.76566	4.99257	0.6123	0.303654		1.06655	6.4376	0.900875	0.38226		1.38923	5.87828	1.1529	0.664634
	108.6	3.6862	4.4704	2.86162	0.943504		3.51828	4.42751	2.72364	0.947393		3.10195	4.45171	2.40515	0.980585		3.35393	4.48345	2.60586	0.971757		0.240925	2.59617	0.148125	0.0560559		0.7593	4.9511	0.60594	0.3005		1.06208	6.41059	0.8964	0.380361		1.38487	5.8598	1.14853	0.662116
	108.9	3.68905	4.47385	2.86447	0.944444		3.51796	4.42711	2.72332	0.947281		3.10237	4.45232	2.40557	0.980758		3.35343	4.48278	2.60536	0.97157		0.2395	2.58082	0.1467	0.0555167		0.75312	4.9108	0.59976	0.297435		1.06005	6.39837	0.894375	0.379502		1.38217	5.84838	1.14583	0.66056
	109.2	3.68843	4.4731	2.86384	0.944238		3.52006	4.42975	2.72542	0.948012		3.10398	4.45461	2.40718	0.981411		3.35447	4.48416	2.6064	0.971956		0.23465	2.52856	0.14185	0.0536812		0.74838	4.87989	0.59502	0.295084		1.0576	6.38358	0.891925	0.378462		1.37863	5.83343	1.1423	0.658523
	109.5	3.6921	4.47755	2.86752	0.94545		3.52056	4.43038	2.72592	0.948186		3.1034	4.45379	2.4066	0.981176		3.35423	4.48385	2.60616	0.971869		0.234625	2.52829	0.141825	0.0536718		0.7417	4.83633	0.58834	0.291772		1.0537	6.36004	0.888025	0.376807		1.3724	5.80705	1.13607	0.654929
	109.8	3.69313	4.4788	2.86855	0.945787		3.52104	4.43099	2.7264	0.948353		3.10542	4.45669	2.40862	0.982002		3.35503	4.48492	2.60696	0.972167		0.233225	2.5132	0.140425	0.053142		0.73618	4.80034	0.58282	0.289034		1.05065	6.34163	0.884975	0.375513		1.36913	5.79323	1.1328	0.653046
	110.1	3.69353	4.47928	2.86895	0.945919		3.523	4.43345	2.72836	0.949034		3.1036	4.45408	2.4068	0.981258		3.35503	4.48492	2.60696	0.972167		0.22915	2.46929	0.13635	0.0515998		0.7318	4.77178	0.57844	0.286862		1.04682	6.31855	0.88115	0.37389		1.36533	5.77715	1.129	0.650856
	110.4	3.69495	4.48101	2.87037	0.946389		3.52268	4.43305	2.72804	0.948923		3.1038	4.45436	2.407	0.981339		3.35423	4.48385	2.60616	0.971869		0.2259	2.43427	0.1331	0.0503699		0.72496	4.72718	0.5716	0.28347		1.04495	6.30723	0.879275	0.373094		1.36317	5.76798	1.12683	0.649606
	110.7	3.69575	4.48198	2.87117	0.946653		3.52396	4.43466	2.72932	0.949368		3.1032	4.4535	2.4064	0.981095		3.35317	4.48242	2.6051	0.971471		0.22305	2.40356	0.13025	0.0492914		0.7248	4.72613	0.57144	0.283391		1.0458	6.31236	0.880125	0.373455		1.35913	5.75092	1.1228	0.647281
	111	3.69782	4.4845	2.87324	0.947337		3.52462	4.43549	2.72998	0.949598		3.10542	4.45669	2.40862	0.982002		3.3545	4.48421	2.60643	0.971968		0.21735	2.34213	0.12455	0.0471343		0.72052	4.69823	0.56716	0.281268		1.04723	6.32096	0.88155	0.37406		1.3591	5.75078	1.12277	0.647262
	111.3	3.69802	4.48474	2.87344	0.947403		3.52576	4.43693	2.73112	0.949994		3.1042	4.45494	2.4074	0.981503		3.3553	4.48528	2.60723	0.972267		0.213275	2.29822	0.120475	0.0455922		0.71746	4.67827	0.5641	0.27975		1.04598	6.31341	0.8803	0.373529		1.35857	5.74852	1.12223	0.646955
	111.6	3.70167	4.48916	2.8771	0.948606		3.52542	4.4365	2.73078	0.949876		3.105	4.45608	2.4082	0.981829		3.35287	4.48202	2.6048	0.971359		0.211825	2.2826	0.119025	0.0450434		0.71372	4.65389	0.56036	0.277896		1.04638	6.31583	0.8807	0.373699		1.3545	5.73131	1.11817	0.64461
	111.9	3.69965	4.48671	2.87507	0.947939		3.52708	4.43859	2.73244	0.950454		3.10257	4.4526	2.40578	0.98084		3.3553	4.48528	2.60723	0.972267		0.207175	2.23249	0.114375	0.0432837		0.71308	4.64971	0.55972	0.277578		1.04232	6.29138	0.87665	0.37198		1.35233	5.72214	1.116	0.643361
	112.2	3.70187	4.48941	2.8773	0.948672		3.52642	4.43776	2.73178	0.950224		3.10418	4.4549	2.40738	0.981492		3.3542	4.4838	2.60613	0.971856		0.207575	2.2368	0.114775	0.0434351		0.7077	4.61463	0.55434	0.27491		1.0393	6.27313	0.873625	0.370697		1.3488	5.70719	1.11247	0.641324
	112.5	3.70045	4.48768	2.87587	0.948203		3.52834	4.44017	2.7337	0.950892		3.10375	4.45429	2.40695	0.981319		3.35503	4.48492	2.60696	0.972167		0.202075	2.17753	0.109275	0.0413537		0.70428	4.59233	0.55092	0.273214		1.03683	6.25819	0.87115	0.369647		1.34637	5.6969	1.11003	0.639921
	112.8	3.70348	4.49135	2.87889	0.9492		3.5297	4.44189	2.73506	0.951365		3.1042	4.45494	2.4074	0.981503		3.35613	4.48639	2.60806	0.972577		0.200225	2.1576	0.107425	0.0406536		0.69892	4.55738	0.54556	0.270556		1.03357	6.23857	0.8679	0.368268		1.3423	5.67969	1.10597	0.637577
	113.1	3.70492	4.49311	2.88035	0.949678		3.52918	4.44123	2.73454	0.951184		3.1046	4.45551	2.4078	0.981666		3.35587	4.48603	2.6078	0.972478		0.1976	2.12931	0.1048	0.0396602		0.69322	4.52021	0.53986	0.267729		1.03135	6.22514	0.865675	0.367324		1.3363	5.6543	1.09997	0.634118
	113.4	3.7082	4.49708	2.88362	0.950758		3.53098	4.4435	2.73634	0.95181		3.10502	4.45612	2.40822	0.981839		3.35667	4.4871	2.6086	0.972776		0.19735	2.12662	0.10455	0.0395656		0.68994	4.49883	0.53658	0.266103		1.0287	6.20914	0.863025	0.366199		1.3333	5.64161	1.09697	0.632389
	113.7	3.70797	4.4968	2.8834	0.950684		3.53114	4.4437	2.7365	0.951866		3.10582	4.45727	2.40903	0.982165		3.3548	4.48461	2.60673	0.97208		0.189475	2.04176	0.096675	0.0365854		0.68424	4.46166	0.53088	0.263276		1.0281	6.20552	0.862425	0.365944		1.3279	5.61876	1.09157	0.629276
	114	3.70717	4.49583	2.88259	0.95042		3.53098	4.4435	2.73634	0.95181		3.10585	4.4573	2.40905	0.982175		3.35643	4.48679	2.60836	0.972689		0.185825	2.00242	0.093025	0.0352041		0.67678	4.41302	0.52342	0.259576		1.02565	6.19073	0.859975	0.364905		1.3222	5.59464	1.08587	0.62599
	114.3	3.70838	4.49729	2.8838	0.950816		3.53178	4.4445	2.73714	0.952088		3.10643	4.45813	2.40963	0.98241		3.3583	4.48929	2.61023	0.973385		0.182125	1.96255	0.089325	0.0338039		0.6712	4.37663	0.51784	0.256809		1.02343	6.1773	0.85775	0.363961		1.3198	5.58449	1.08347	0.624606
	114.6	3.7088	4.4978	2.88422	0.950956		3.53388	4.44715	2.73924	0.952819		3.10622	4.45784	2.40943	0.982328		3.35693	4.48746	2.60886	0.972876		0.1793	1.93211	0.0865	0.0327348		0.66782	4.35459	0.51446	0.255133		1.02317	6.1758	0.8575	0.363855		1.3149	5.56375	1.07857	0.621781
	114.9	3.71062	4.50002	2.88605	0.951557		3.53388	4.44715	2.73924	0.952819		3.10708	4.45906	2.41027	0.982675		3.35777	4.48857	2.6097	0.973186		0.175425	1.89036	0.082625	0.0312683		0.66014	4.30451	0.50678	0.251324		1.01893	6.15014	0.85325	0.362051		1.31107	5.54753	1.07473	0.619571
	115.2	3.71185	4.5015	2.88727	0.951961		3.53684	4.45087	2.7422	0.953849		3.10643	4.45813	2.40963	0.98241		3.35857	4.48964	2.6105	0.973485		0.17215	1.85506	0.07935	0.030029		0.65674	4.28234	0.50338	0.249638		1.0173	6.14033	0.851625	0.361362		1.3062	5.52694	1.06987	0.616766
	115.5	3.7151	4.50545	2.89052	0.953033		3.53604	4.44986	2.7414	0.95357		3.10705	4.45903	2.41025	0.982664		3.35747	4.48817	2.6094	0.973075		0.170125	1.83324	0.077325	0.0292626		0.65168	4.24935	0.49832	0.247129		1.01525	6.12796	0.849575	0.360492		1.30023	5.50169	1.0639	0.613326
	115.8	3.7155	4.50593	2.89092	0.953165		3.53828	4.45268	2.74364	0.954349		3.10787	4.46021	2.41107	0.983001		3.35857	4.48964	2.6105	0.973485		0.166875	1.79822	0.074075	0.0280327		0.64776	4.22379	0.4944	0.245185		1.01402	6.12057	0.84835	0.359972		1.2994	5.49817	1.06307	0.612846
	116.1	3.7161	4.50666	2.89152	0.953363		3.53944	4.45414	2.7448	0.954753		3.10685	4.45874	2.41005	0.982583		3.35937	4.49071	2.6113	0.973783		0.16545	1.78287	0.07265	0.0274934		0.6437	4.19731	0.49034	0.243171		1.012	6.10834	0.846325	0.359113		1.29533	5.48096	1.059	0.610501
	116.4	3.71795	4.5089	2.89337	0.953973		3.53862	4.45311	2.74398	0.954468		3.1095	4.46254	2.4127	0.983663		3.35913	4.4904	2.61106	0.973696		0.1628	1.75431	0.07	0.0264906		0.63754	4.15715	0.48418	0.240116		1.01097	6.10216	0.8453	0.358678		1.28803	5.45007	1.0517	0.606293
	116.7	3.71877	4.5099	2.89419	0.954245		3.54024	4.45515	2.7456	0.955031		3.10787	4.46021	2.41107	0.983001		3.36157	4.49365	2.6135	0.974603		0.160975	1.73464	0.068175	0.0257999		0.63394	4.13367	0.48058	0.238331		1.0065	6.07515	0.840825	0.356779		1.28507	5.43752	1.04873	0.604583
	117	3.71935	4.5106	2.89477	0.954434		3.54088	4.45595	2.74624	0.955254		3.1099	4.46312	2.4131	0.983826		3.3602	4.49183	2.61213	0.974094		0.1581	1.70366	0.0653	0.0247119		0.62956	4.10511	0.4762	0.236159		1.00242	6.05055	0.83675	0.35505		1.28043	5.41791	1.0441	0.601912
	117.3	3.72182	4.5136	2.89724	0.95525		3.54268	4.45822	2.74804	0.95588		3.1103	4.46369	2.4135	0.98399		3.35967	4.49111	2.6116	0.973895		0.155675	1.67753	0.062875	0.0237942		0.62644	4.08477	0.47308	0.234611		0.998375	6.02611	0.8327	0.353332		1.27853	5.40987	1.0422	0.600816
	117.6	3.72162	4.51336	2.89704	0.955184		3.54254	4.45804	2.7479	0.955831		3.1097	4.46283	2.4129	0.983745		3.3618	4.49396	2.61373	0.97469		0.14915	1.60722	0.05635	0.0213249		0.62076	4.04773	0.4674	0.231795		0.9959	6.01117	0.830225	0.352281		1.27583	5.39845	1.0395	0.59926
	117.9	3.72302	4.51506	2.89845	0.955646		3.54336	4.45908	2.74872	0.956116		3.1101	4.4634	2.4133	0.983908		3.3602	4.49183	2.61213	0.974094		0.1504	1.62069	0.0576	0.021798		0.61752	4.0266	0.46416	0.230188		0.995925	6.01132	0.83025	0.352292		1.2712	5.37884	1.03487	0.596589
	118.2	3.72345	4.51557	2.89887	0.955786		3.54272	4.45827	2.74808	0.955894		3.10847	4.46107	2.41167	0.983245		3.3621	4.49437	2.61403	0.974802		0.14855	1.60075	0.05575	0.0210978		0.6144	4.00626	0.46104	0.228641		0.9943	6.00151	0.828625	0.351602		1.27067	5.37659	1.03433	0.596281
	118.5	3.72487	4.5173	2.90029	0.956256		3.54466	4.46071	2.75002	0.956569		3.1097	4.46283	2.4129	0.983745		3.36237	4.49472	2.6143	0.974902		0.147725	1.59186	0.054925	0.0207856		0.60918	3.97222	0.45582	0.226052		0.991675	5.98566	0.826	0.350489		1.26683	5.36037	1.0305	0.594071
	118.8	3.72587	4.51851	2.9013	0.956585		3.54544	4.46169	2.7508	0.95684		3.10907	4.46193	2.41228	0.98349		3.36183	4.49401	2.61376	0.974703		0.14325	1.54364	0.05045	0.0190921		0.6061	3.95214	0.45274	0.224524		0.987575	5.96092	0.8219	0.348749		1.26063	5.33413	1.0243	0.590497
	119.1	3.72708	4.51997	2.9025	0.956981		3.54612	4.46255	2.75148	0.957076		3.11112	4.46488	2.41432	0.984326		3.35993	4.49147	2.61186	0.973994		0.139	1.49784	0.0462	0.0174838		0.60398	3.93832	0.45062	0.223473		0.989	5.96952	0.823325	0.349354		1.25737	5.32031	1.02103	0.588614
	119.4	3.7279	4.52097	2.90332	0.957253		3.54776	4.46461	2.75312	0.957647		3.1095	4.46254	2.4127	0.983663		3.361	4.4929	2.61293	0.974392		0.135525	1.4604	0.042725	0.0161687		0.6009	3.91823	0.44754	0.221946		0.987	5.95745	0.821325	0.348505		1.25383	5.30536	1.0175	0.586577
	119.7	3.72915	4.52248	2.90457	0.957665		3.54646	4.46298	2.75182	0.957195		3.11052	4.46401	2.41372	0.984081		3.3629	4.49543	2.61483	0.975101		0.1331	1.43427	0.0403	0.015251		0.59456	3.87689	0.4412	0.218801		0.988	5.96348	0.822325	0.348929		1.253	5.30183	1.01667	0.586097
	120	3.72958	4.523	2.90499	0.957805		3.54904	4.46622	2.7544	0.958092		3.1103	4.46369	2.4135	0.98399		3.36207	4.49432	2.614	0.97479		0.131675	1.41891	0.038875	0.0147117		0.59358	3.8705	0.44022	0.218315		0.9882	5.96469	0.822525	0.349014		1.24813	5.28124	1.0118	0.583291
	120.3	3.73097	4.5247	2.90639	0.958267		3.54936	4.46663	2.75472	0.958203		3.1105	4.46398	2.4137	0.984071		3.36263	4.49508	2.61456	0.975001		0.133275	1.43615	0.040475	0.0153172		0.589	3.84064	0.43564	0.216044		0.98515	5.94628	0.819475	0.34772		1.24623	5.2732	1.0099	0.582196
	120.6	3.73037	4.52397	2.90579	0.958069		3.54856	4.46562	2.75392	0.957925		3.11072	4.4643	2.41392	0.984163		3.36103	4.49294	2.61296	0.974405		0.131475	1.41676	0.038675	0.014636		0.58544	3.81742	0.43208	0.214279		0.9831	5.93391	0.817425	0.34685		1.24353	5.26178	1.0072	0.580639
	120.9	3.73095	4.52467	2.90637	0.958259		3.55116	4.46889	2.75652	0.95883		3.11215	4.46635	2.41535	0.984744		3.36373	4.49655	2.61566	0.975411		0.1292	1.39224	0.0364	0.0137751		0.583	3.80151	0.42964	0.213069		0.979225	5.91052	0.81355	0.345206		1.2389	5.24217	1.00257	0.577968
	121.2	3.73157	4.52543	2.907	0.958465		3.55312	4.47136	2.75848	0.959511		3.11172	4.46574	2.41493	0.984571		3.36153	4.49361	2.61346	0.974591		0.125575	1.35318	0.032775	0.0124033		0.57974	3.78026	0.42638	0.211452		0.975575	5.88849	0.8099	0.343657		1.2335	5.21932	0.997167	0.574855
	121.5	3.73342	4.52767	2.90884	0.959075		3.55292	4.47111	2.75828	0.959442		3.11275	4.46721	2.41595	0.984988		3.3629	4.49543	2.61483	0.975101		0.122925	1.32462	0.030125	0.0114004		0.57372	3.741	0.42036	0.208466		0.971525	5.86404	0.80585	0.341939		1.23077	5.20776	0.994433	0.573279
	121.8	3.73628	4.53112	2.91169	0.960014		3.5549	4.4736	2.76026	0.960131		3.11172	4.46574	2.41493	0.984571		3.364	4.49691	2.61593	0.975511		0.1217	1.31142	0.0289	0.0109368		0.57096	3.723	0.4176	0.207098		0.968675	5.84684	0.803	0.340729		1.2245	5.18124	0.988167	0.569667
	122.1	3.73787	4.53307	2.9133	0.960542		3.5544	4.47297	2.75976	0.959957		3.1115	4.46541	2.4147	0.984479		3.3618	4.49396	2.61373	0.97469		0.11865	1.27856	0.02585	0.00978259		0.5641	3.67827	0.41074	0.203696		0.9664	5.83311	0.800725	0.339764		1.2153	5.14231	0.978967	0.564363
[truncated: 593 more rows]

## Sheet: 21st day of drought
Variable OJIP chlorophyll fluorescence from PSII and the amount of oxidized PSI primary Chl electron donor (P700+)
[truncated: 1,007 more rows]

## Sheet: 28th day of drought
Variable OJIP chlorophyll fluorescence from PSII and the amount of oxidized PSI primary Chl electron donor (P700+)
[truncated: 1,007 more rows]
