# Supplementary material for: Contrasting response of biomass and grain yield to severe drought in Cappelle Desprez and Plainsman V wheat cultivars
Source: PeerJ. 2016 Feb 18;4:e1708. doi: 10.7717/peerj.1708 (PMC4815492; doi:10.7717/peerj.1708)
Supplement: Supplemental Information 4 — Electron transport rates through PSI (ETR(I)) and PSII (ETR(II)) were measured in leaves of well watered (60% W-) and drought stressed (10% W) Cappelle Desprez (circles) and Plainsman V. (squares) cv. wheat seedlings at different light intensities of 94, 363 and 849 µmol photons m−2s−1. The values, which are shown as a function of the duration of drought treatment, represent the mean ±SE of five plants per treatment. [file peerj-04-1708-s004.xlsx]

## Sheet: Figure 6
Changes in the ETR(I)/ETR(II) ratio as a function of light
	(A) ETR(I)/ETR(II)- PPFD 94 µmol photons m-2 s-1
Secondary leaves	10%W Cappelle	±SE	60%W Cappelle	±SE	10%W Plainsman	±SE	60%W Plainsman	±SE
1st day of drought	1.1878	0.01551	1.1878	0.01551	1.27837	0.02443	1.27837	0.02443
9th day of drought	1.42032	0.0538	1.44975	0.05559	1.50016	0.06334	1.4297	0.0142
13th day of drought	1.42051	0.01123	1.43812	0.03599	1.44891	0.01881	1.44787	0.03513
21st day of drought	1.3654	0.02147	1.42682	0.02426	1.60477	0.03582	1.5107	0.05095
Flag leaves
22nd day of drought	1.35966	0.03001	1.41562	0.02554	1.4963	0.05098	1.57338	0.0276
28th day of drought	1.41415	0.06135	1.41301	0.02612	1.55363	0.07554	1.66591	0.09713
	(B) ETR(I)/ETR(II)- PPFD 363 µmol photons m-2 s-1
Secondary leaves	10%W Cappelle	±SE	60%W Cappelle	±SE	10%W Plainsman	±SE	60%W Plainsman	±SE
1st day of drought	1.4971	0.02938	1.4971	0.02938	1.44839	0.03801	1.44839	0.03801
9th day of drought	1.74937	0.04299	1.69815	0.07025	1.80615	0.16077	1.60808	0.03376
13th day of drought	1.95603	0.0644	2.0054	0.0548	1.94252	0.09859	1.7307	0.03664
21st day of drought	1.82043	0.04908	1.61451	0.02301	1.62215	0.08632	1.65597	0.07135
Flag leaves
22nd day of drought	1.82133	0.06805	1.88159	0.10186	1.69032	0.16094	1.88503	0.13131
28th day of drought	1.93316	0.18278	1.73645	0.11118	1.57036	0.02547	1.89429	0.14247
	(C) ETR(I)/ETR(II)- PPFD 849 µmol photons m-2 s-1
Secondary leaves	10%W Cappelle	±SE	60%W Cappelle	±SE	10%W Plainsman	±SE	60%W Plainsman	±SE
1st day of drought	1.58846	0.0354	1.58846	0.0354	1.46829	0.06974	1.46829	0.06974
9th day of drought	1.81021	0.04947	1.77943	0.07309	1.86169	0.21273	1.65095	0.06646
13th day of drought	2.20013	0.09771	2.18052	0.06804	2.09188	0.13401	1.84787	0.04449
21st day of drought	2.04367	0.07481	1.72437	0.01857	1.75721	0.12167	1.77598	0.05689
Flag leaves
22nd day of drought	2.44936	0.14275	2.11295	0.13621	1.80616	0.24222	2.05433	0.15543
28th day of drought	2.32839	0.24053	1.85521	0.14008	1.70553	0.04155	2.28504	0.24842
Data presented are from the mean (n=5) of five plants/treatment.
